# Supplementary material for: Translatome analysis reveals cellular network in DLK-dependent hippocampal glutamatergic neuron degeneration
Source: eLife. 2025 Mar 11;13:RP101173. doi: 10.7554/eLife.101173 (PMC11896613; doi:10.7554/eLife.101173)
Supplement: Supplementary file 1. — File containing differential expression results from DLK(cKO) compared to control and their regional enrichment. Highlighted columns show gene symbols of differentially expressed genes (padj <0.05), Log2 fold change, and adjusted p-values. Sheets show genes sorted by all differentially expressed genes, upregulated genes, downregulated genes, and synaptic genes. [file elife-101173-supp1.xlsx]

## Sheet: WT vs DLKcKO Ribotag P15 hp gen
ENTREZID	SYMBOL	GENENAME	GeneID	Base mean	log2(FC)	StdErr	Wald-Stats	pvalue	padj
16476	Jun	jun proto-oncogene	ENSMUSG00000052684	3222.07	-0.346339	0.0352668	-9.82056	9.18286e-23	7.52535e-19
56471	Stmn4	stathmin-like 4	ENSMUSG00000022044	8092.25	-0.263065	0.0300699	-8.74843	2.16338e-18	8.86445e-15
27387	Sh2d3c	SH2 domain containing 3C	ENSMUSG00000059013	809.04	-0.29818	0.0473657	-6.29526	3.06879e-10	8.3829e-07
26558	Homer3	homer scaffolding protein 3	ENSMUSG00000003573	1865.45	-0.22524	0.0438473	-5.13692	2.79272e-07	0.000572159
140743	Rem2	rad and gem related GTP binding protein 2	ENSMUSG00000022176	1257.95	-0.228624	0.0450405	-5.07596	3.85547e-07	0.000631912
23965	Tenm3	teneurin transmembrane protein 3	ENSMUSG00000031561	3783.9	0.191862	0.0381168	5.03353	4.81525e-07	0.000657683
18111	Nnat	neuronatin	ENSMUSG00000067786	15941.8	-0.151469	0.0310221	-4.88261	1.04689e-06	0.00111875
213783	Plekhg1	pleckstrin homology domain containing, family G (with RhoGef domain) member 1	ENSMUSG00000040624	1135.44	-0.240414	0.0493231	-4.87427	1.09212e-06	0.00111875
320554	Tcp11l1	t-complex 11 like 1	ENSMUSG00000027175	490.516	0.229425	0.0503913	4.55287	5.29179e-06	0.00441539
76161	Lamp5	lysosomal-associated membrane protein family, member 5	ENSMUSG00000027270	513.622	0.226143	0.050318	4.49427	6.98103e-06	0.00441539
21912	Tspan7	tetraspanin 7	ENSMUSG00000058254	16302.4	-0.120934	0.0268023	-4.5121	6.41901e-06	0.00441539
16478	Jund	jun D proto-oncogene	ENSMUSG00000071076	3059.93	-0.171676	0.0382049	-4.49356	7.00429e-06	0.00441539
26404	Map3k12	mitogen-activated protein kinase kinase kinase 12	ENSMUSG00000023050	3607.65	-0.154412	0.034247	-4.50878	6.52026e-06	0.00441539
27008	Micall1	microtubule associated monooxygenase, calponin and LIM domain containing -like 1	ENSMUSG00000033039	943.003	0.221804	0.0495752	4.47408	7.67396e-06	0.00449201
226562	Prrc2c	proline-rich coiled-coil 2C	ENSMUSG00000040225	4111.75	0.14018	0.0331036	4.23459	2.2897e-05	0.0125094
11834	Aqr	aquarius	ENSMUSG00000040383	699.177	-0.207321	0.0497052	-4.17102	3.03238e-05	0.0146661
238323	Rps6kl1	ribosomal protein S6 kinase-like 1	ENSMUSG00000019235	1691.6	-0.173305	0.0416716	-4.15884	3.19872e-05	0.0146661
11789	Apc	adenomatosis polyposis coli	ENSMUSG00000005871	13045	0.122837	0.0295479	4.15723	3.22135e-05	0.0146661
50918	Myadm	myeloid-associated differentiation marker	ENSMUSG00000068566	8682.12	-0.140305	0.0340756	-4.11747	3.83059e-05	0.0162985
22129	Ttc3	tetratricopeptide repeat domain 3	ENSMUSG00000040785	17252.8	-0.138925	0.0338119	-4.10877	3.97767e-05	0.0162985
15194	Htt	huntingtin	ENSMUSG00000029104	4253.57	-0.134144	0.0330566	-4.05801	4.94933e-05	0.0193142
18164	Nptx1	neuronal pentraxin 1	ENSMUSG00000025582	25968	-0.118373	0.0295885	-4.00063	6.31749e-05	0.0235327
17754	Map1a	microtubule-associated protein 1 A	ENSMUSG00000027254	33280.4	0.109909	0.027881	3.94207	8.07813e-05	0.0275902
207596	Thsd4	thrombospondin, type I, domain containing 4	ENSMUSG00000032289	5501.95	-0.155368	0.0394135	-3.94201	8.08012e-05	0.0275902
223726	Mpped1	metallophosphoesterase domain containing 1	ENSMUSG00000041708	6526.79	0.121513	0.0312108	3.89331	9.8886e-05	0.0324148
66860	Tanc1	tetratricopeptide repeat, ankyrin repeat and coiled-coil containing 1	ENSMUSG00000035168	3880.68	-0.161416	0.0420375	-3.83981	0.000123132	0.0357466
12444	Ccnd2	cyclin D2	ENSMUSG00000000184	5362.11	-0.160964	0.0419405	-3.83792	0.000124082	0.0357466
67468	Mmd	monocyte to macrophage differentiation-associated	ENSMUSG00000003948	7881.91	-0.125161	0.0326521	-3.83318	0.000126498	0.0357466
20741	Sptb	spectrin beta, erythrocytic	ENSMUSG00000021061	2672.73	-0.162832	0.0423412	-3.8457	0.00012021	0.0357466
73340	Nptxr	neuronal pentraxin receptor	ENSMUSG00000022421	70615.4	-0.0994493	0.0260022	-3.82464	0.000130961	0.0357741
76900	Ssbp4	single stranded DNA binding protein 4	ENSMUSG00000070003	3102.86	0.157951	0.0416337	3.79383	0.00014834	0.0367396
18040	Nefm	neurofilament, medium polypeptide	ENSMUSG00000022054	13898.4	0.12325	0.032545	3.78708	0.000152428	0.0367396
20524	Slc25a17	solute carrier family 25 (mitochondrial carrier, peroxisomal membrane protein), member 17	ENSMUSG00000022404	758.287	0.191601	0.0505371	3.79129	0.000149865	0.0367396
207785	Csrnp2	cysteine-serine-rich nuclear protein 2	ENSMUSG00000044636	1188.68	0.167961	0.0442809	3.79308	0.000148793	0.0367396
12297	Cacnb3	calcium channel, voltage-dependent, beta 3 subunit	ENSMUSG00000003352	5146.19	-0.119332	0.0318811	-3.74304	0.000181808	0.0425691
110637	Grik4	glutamate receptor, ionotropic, kainate 4	ENSMUSG00000032017	2851.48	-0.137544	0.0368929	-3.72819	0.000192857	0.0439018
21808	Tgfb2	transforming growth factor, beta 2	ENSMUSG00000039239	2572.2	-0.149348	0.0406939	-3.67002	0.000242528	0.0537166
50786	Hs6st2	heparan sulfate 6-O-sulfotransferase 2	ENSMUSG00000062184	1378.12	0.17091	0.0468204	3.65034	0.000261893	0.0564794
18823	Plp1	proteolipid protein (myelin) 1	ENSMUSG00000031425	1810.3	0.169286	0.0469547	3.6053	0.000311795	0.0655168
210801	Unc5d	unc-5 netrin receptor D	ENSMUSG00000063626	758.293	0.18018	0.050468	3.57019	0.000356727	0.0726403
19009	Pou6f1	POU domain, class 6, transcription factor 1	ENSMUSG00000009739	2076.92	0.141807	0.0397741	3.56531	0.000363423	0.0726403
170738	Kcnh7	potassium voltage-gated channel, subfamily H (eag-related), member 7	ENSMUSG00000059742	1884.76	0.15596	0.0438288	3.55838	0.000373149	0.0728085
13527	Dtna	dystrobrevin alpha	ENSMUSG00000024302	3647.97	-0.123098	0.0347383	-3.54359	0.000394715	0.0752254
67295	Rab3c	RAB3C, member RAS oncogene family	ENSMUSG00000021700	20385.8	0.104933	0.0296902	3.53425	0.000408929	0.0761631
64074	Smoc2	SPARC related modular calcium binding 2	ENSMUSG00000023886	721.966	-0.17265	0.0489797	-3.52493	0.000423591	0.0771407
18791	Plat	plasminogen activator, tissue	ENSMUSG00000031538	851.14	-0.168342	0.0481327	-3.49745	0.000469736	0.0836845
18377	Omg	oligodendrocyte myelin glycoprotein	ENSMUSG00000049612	2526.79	0.135538	0.0389235	3.48216	0.000497385	0.0850648
105859	Csdc2	cold shock domain containing C2, RNA binding	ENSMUSG00000042109	2104.82	0.154883	0.0444849	3.4817	0.000498244	0.0850648
20512	Slc1a3	solute carrier family 1 (glial high affinity glutamate transporter), member 3	ENSMUSG00000005360	584.716	0.173793	0.0503047	3.45481	0.000550681	0.0920985
64176	Sv2b	synaptic vesicle glycoprotein 2 b	ENSMUSG00000053025	39978.3	-0.0977431	0.0284582	-3.43462	0.000593375	0.0950739
234577	Cpne2	copine II	ENSMUSG00000034361	1542.65	-0.147128	0.0428927	-3.43014	0.000603276	0.0950739
59033	Slc4a8	solute carrier family 4 (anion exchanger), member 8	ENSMUSG00000023032	5457.37	0.108669	0.0316667	3.43165	0.000599931	0.0950739
14766	Adgrg1	adhesion G protein-coupled receptor G1	ENSMUSG00000031785	984.801	-0.161556	0.0472474	-3.41935	0.000627707	0.0970578
58235	Nectin1	nectin cell adhesion molecule 1	ENSMUSG00000032012	3665.7	-0.127287	0.0373	-3.41252	0.000643642	0.0976786
18526	Pcdh10	protocadherin 10	ENSMUSG00000049100	3409.88	0.139735	0.0416049	3.35861	0.000783356	0.114636
381677	Vgf	VGF nerve growth factor inducible	ENSMUSG00000037428	13508.8	-0.104948	0.0312235	-3.36119	0.000776065	0.114636
232023	Vopp1	vesicular, overexpressed in cancer, prosurvival protein 1	ENSMUSG00000037788	2205.04	0.12697	0.0385613	3.29268	0.000992357	0.140213
19280	Ptprs	protein tyrosine phosphatase, receptor type, S	ENSMUSG00000013236	19459.3	-0.102816	0.0312009	-3.2953	0.000983166	0.140213
12890	Cplx2	complexin 2	ENSMUSG00000025867	63662.2	-0.0852148	0.0259784	-3.28022	0.00103725	0.144072
268890	Lsamp	limbic system-associated membrane protein	ENSMUSG00000061080	14845.3	0.099002	0.0302469	3.27313	0.00106362	0.145273
98170	Tmem132a	transmembrane protein 132A	ENSMUSG00000024736	10903.3	-0.10716	0.032816	-3.26548	0.00109279	0.146809
20744	Strbp	spermatid perinuclear RNA binding protein	ENSMUSG00000026915	3480	0.114402	0.0351101	3.25838	0.00112052	0.14724
22343	Lin7c	lin-7 homolog C (C. elegans)	ENSMUSG00000027162	2600.38	-0.129602	0.0399058	-3.2477	0.00116343	0.14724
18710	Pik3r3	phosphoinositide-3-kinase regulatory subunit 3	ENSMUSG00000028698	1112.95	-0.153983	0.0473779	-3.2501	0.00115363	0.14724
77134	Hnrnpa0	heterogeneous nuclear ribonucleoprotein A0	ENSMUSG00000007836	4192.49	-0.115629	0.0356153	-3.24662	0.00116786	0.14724
81905	Cacng8	calcium channel, voltage-dependent, gamma subunit 8	ENSMUSG00000053395	6904.69	-0.0995558	0.0307101	-3.24179	0.0011878	0.147485
269109	Dpp10	dipeptidylpeptidase 10	ENSMUSG00000036815	863.865	0.163564	0.0505545	3.23539	0.00121475	0.14858
17755	Map1b	microtubule-associated protein 1B	ENSMUSG00000052727	37630.1	0.0912588	0.0283074	3.22385	0.00126481	0.152428
70713	Gpr137c	G protein-coupled receptor 137C	ENSMUSG00000049092	819.078	-0.154682	0.0481133	-3.21495	0.00130466	0.154952
320495	Ipcef1	interaction protein for cytohesin exchange factors 1	ENSMUSG00000064065	1044.97	0.156228	0.0487968	3.20161	0.00136663	0.159993
69908	Rab3b	RAB3B, member RAS oncogene family	ENSMUSG00000003411	776.099	0.147415	0.0462696	3.18599	0.00144257	0.164991
93760	Arid1a	AT rich interactive domain 1A (SWI-like)	ENSMUSG00000007880	3447.58	0.114163	0.0358937	3.1806	0.00146972	0.164991
65079	Rtn4r	reticulon 4 receptor	ENSMUSG00000043811	2673.68	-0.127924	0.040171	-3.18447	0.00145017	0.164991
17196	Mbp	myelin basic protein	ENSMUSG00000041607	5189.98	0.130898	0.0415593	3.14966	0.0016346	0.181021
225392	Rell2	RELT-like 2	ENSMUSG00000044024	1823.82	0.131819	0.0419312	3.1437	0.00166827	0.182286
226359	C1ql2	complement component 1, q subcomponent-like 2	ENSMUSG00000036907	829.105	-0.150676	0.0485391	-3.10423	0.00190775	0.200436
235106	Ntm	neurotrimin	ENSMUSG00000059974	3594.38	0.115387	0.0370849	3.11144	0.00186178	0.200436
216825	Usp22	ubiquitin specific peptidase 22	ENSMUSG00000042506	15197.2	-0.103135	0.033222	-3.10441	0.00190659	0.200436
241638	Lzts3	leucine zipper, putative tumor suppressor family member 3	ENSMUSG00000037703	4072.66	-0.113077	0.0365199	-3.09631	0.00195943	0.200719
21881	Tkt	transketolase	ENSMUSG00000021957	3777.9	0.10803	0.0348675	3.09828	0.00194645	0.200719
214162	Kmt2a	lysine (K)-specific methyltransferase 2A	ENSMUSG00000002028	1014.05	0.147025	0.0476136	3.08788	0.00201587	0.201464
20317	Serpinf1	serine (or cysteine) peptidase inhibitor, clade F, member 1	ENSMUSG00000000753	337.506	-0.155175	0.0502273	-3.08945	0.00200526	0.201464
433022	Plcxd2	phosphatidylinositol-specific phospholipase C, X domain containing 2	ENSMUSG00000087141	2548.81	0.128011	0.0415315	3.08225	0.0020544	0.202842
232333	Slc6a1	solute carrier family 6 (neurotransmitter transporter, GABA), member 1	ENSMUSG00000030310	929.915	0.14989	0.0488752	3.06679	0.0021637	0.204038
20238	Atxn1	ataxin 1	ENSMUSG00000046876	2808.57	0.119625	0.0390589	3.06269	0.00219361	0.204038
15519	Hsp90aa1	heat shock protein 90, alpha (cytosolic), class A member 1	ENSMUSG00000021270	35685.9	-0.0791095	0.0258515	-3.06016	0.00221222	0.204038
20607	Sstr3	somatostatin receptor 3	ENSMUSG00000044933	1597.87	-0.136201	0.044484	-3.06179	0.00220021	0.204038
224022	Slc7a4	solute carrier family 7 (cationic amino acid transporter, y+ system), member 4	ENSMUSG00000022756	2611.07	-0.112202	0.0366716	-3.05966	0.00221591	0.204038
110197	Dgkg	diacylglycerol kinase, gamma	ENSMUSG00000022861	7518.82	-0.0990177	0.0323121	-3.06442	0.00218092	0.204038
170835	Inpp5j	inositol polyphosphate 5-phosphatase J	ENSMUSG00000034570	2342.32	-0.124095	0.0406206	-3.05498	0.00225073	0.204942
76813	Armc6	armadillo repeat containing 6	ENSMUSG00000002343	1363.22	-0.140186	0.046197	-3.03453	0.0024091	0.214604
76820	Fam49a	family with sequence similarity 49, member A	ENSMUSG00000020589	10876.3	0.0830709	0.0273754	3.03452	0.00240922	0.214604
242570	Raver2	ribonucleoprotein, PTB-binding 2	ENSMUSG00000035275	2329.62	-0.11876	0.0391855	-3.03071	0.00243976	0.214988
19417	Rasgrf1	RAS protein-specific guanine nucleotide-releasing factor 1	ENSMUSG00000032356	11537.3	-0.106114	0.035142	-3.01959	0.00253116	0.218346
22671	Rnf112	ring finger protein 112	ENSMUSG00000010086	8728.7	-0.091509	0.0302968	-3.02042	0.00252422	0.218346
11677	Akr1b3	aldo-keto reductase family 1, member B3 (aldose reductase)	ENSMUSG00000001642	531.145	0.151496	0.0505784	2.99526	0.00274207	0.230623
78651	Lsm6	LSM6 homolog, U6 small nuclear RNA and mRNA degradation associated	ENSMUSG00000031683	347.588	0.149014	0.049764	2.99442	0.00274968	0.230623
12286	Cacna1a	calcium channel, voltage-dependent, P/Q type, alpha 1A subunit	ENSMUSG00000034656	5704.86	-0.115141	0.0384634	-2.99351	0.0027579	0.230623
114874	Ddhd1	DDHD domain containing 1	ENSMUSG00000037697	1382.94	0.129316	0.0432977	2.98668	0.00282026	0.233016
11676	Aldoc	aldolase C, fructose-bisphosphate	ENSMUSG00000017390	390.756	0.150734	0.0505111	2.98418	0.0028434	0.233016
74747	Ddit4	DNA-damage-inducible transcript 4	ENSMUSG00000020108	1862.51	-0.138291	0.0464581	-2.97669	0.00291383	0.236424
18007	Neo1	neogenin	ENSMUSG00000032340	3905.27	0.116937	0.0393694	2.97025	0.00297562	0.239071
20511	Slc1a2	solute carrier family 1 (glial high affinity glutamate transporter), member 2	ENSMUSG00000005089	22417.8	0.0764896	0.0258082	2.96377	0.00303892	0.241786
27367	Rpl3	ribosomal protein L3	ENSMUSG00000060036	4355.99	0.133995	0.0454316	2.94938	0.00318416	0.250906
12035	Bcat1	branched chain aminotransferase 1, cytosolic	ENSMUSG00000030268	2859.97	0.124444	0.042266	2.9443	0.00323689	0.252631
84035	Kremen1	kringle containing transmembrane protein 1	ENSMUSG00000020393	442.286	-0.148673	0.0505746	-2.93968	0.00328553	0.254008
223604	Kcnk9	potassium channel, subfamily K, member 9	ENSMUSG00000036760	2107.27	0.136052	0.0463659	2.93432	0.00334278	0.256019
22003	Tpm1	tropomyosin 1, alpha	ENSMUSG00000032366	5052.82	-0.121171	0.0413408	-2.93103	0.00337844	0.256355
399548	Scn4b	sodium channel, type IV, beta	ENSMUSG00000046480	563.788	0.14788	0.0505721	2.92414	0.00345405	0.259688
380684	Nefh	neurofilament, heavy polypeptide	ENSMUSG00000020396	2779.06	0.126831	0.0434448	2.91936	0.00350752	0.26131
22360	Nrsn1	neurensin 1	ENSMUSG00000048978	1906.39	0.121583	0.0417551	2.91181	0.00359346	0.262932
22042	Tfrc	transferrin receptor	ENSMUSG00000022797	2516.87	0.0950026	0.0326021	2.914	0.00356827	0.262932
110891	Slc8a2	solute carrier family 8 (sodium/calcium exchanger), member 2	ENSMUSG00000030376	25430.6	-0.0843074	0.0291293	-2.89425	0.00380069	0.27084
20430	Cyfip1	cytoplasmic FMR1 interacting protein 1	ENSMUSG00000030447	2463.07	-0.117236	0.0404726	-2.89668	0.00377134	0.27084
71949	Cers5	ceramide synthase 5	ENSMUSG00000023021	596.779	0.145578	0.0502864	2.89498	0.00379183	0.27084
56541	Habp4	hyaluronic acid binding protein 4	ENSMUSG00000021476	5095.3	0.10231	0.0353897	2.89095	0.00384075	0.271336
16592	Fabp5	fatty acid binding protein 5, epidermal	ENSMUSG00000027533	1181.8	0.140047	0.0485558	2.88425	0.00392342	0.274807
12716	Ckmt1	creatine kinase, mitochondrial 1, ubiquitous	ENSMUSG00000000308	7935.9	0.10778	0.0376728	2.86096	0.00422358	0.287509
110078	Pygb	brain glycogen phosphorylase	ENSMUSG00000033059	4939.6	-0.0970925	0.0340134	-2.85454	0.00430991	0.287509
229791	Plppr4	phospholipid phosphatase related 4	ENSMUSG00000044667	20605.3	-0.077999	0.0272648	-2.86079	0.00422586	0.287509
13822	Epb41l2	erythrocyte membrane protein band 4.1 like 2	ENSMUSG00000019978	640.287	0.141889	0.0497132	2.85415	0.00431527	0.287509
238130	Dock4	dedicator of cytokinesis 4	ENSMUSG00000035954	9405.65	-0.100977	0.0353725	-2.85466	0.00430824	0.287509
11911	Atf4	activating transcription factor 4	ENSMUSG00000042406	1563.61	0.119714	0.0418212	2.86252	0.00420281	0.287509
406218	Panx2	pannexin 2	ENSMUSG00000058441	2537.83	0.110864	0.0389825	2.84393	0.00445604	0.294494
11550	Adra1d	adrenergic receptor, alpha 1d	ENSMUSG00000027335	2887.32	-0.11751	0.041472	-2.83348	0.00460436	0.301862
17965	Nbl1	neuroblastoma, suppression of tumorigenicity 1	ENSMUSG00000041120	1561.2	-0.123365	0.0435987	-2.82955	0.00466133	0.302744
103551	Epop	elongin BC and polycomb repressive complex 2 associated protein	ENSMUSG00000043439	486.916	0.142676	0.0504919	2.82573	0.00471732	0.302744
53357	Pla2g6	phospholipase A2, group VI	ENSMUSG00000042632	579.88	-0.14281	0.050553	-2.82496	0.00472864	0.302744
224671	Btbd9	BTB (POZ) domain containing 9	ENSMUSG00000062202	4010.97	-0.10745	0.0381075	-2.81965	0.00480768	0.305418
18218	Dusp8	dual specificity phosphatase 8	ENSMUSG00000037887	6020.67	-0.0917337	0.0325868	-2.81506	0.00487687	0.307431
NA	NA	NA	ENSMUSG00000097451	6841.24	0.141887	0.0505777	2.80532	0.00502667	0.314455
12520	Cd81	CD81 antigen	ENSMUSG00000037706	3168.95	-0.0985651	0.0352807	-2.79374	0.00521018	0.323466
78928	Pigt	phosphatidylinositol glycan anchor biosynthesis, class T	ENSMUSG00000017721	2554.9	0.125743	0.0451114	2.78739	0.00531345	0.327397
228012	Tlk1	tousled-like kinase 1	ENSMUSG00000041997	2605.69	0.105765	0.0380721	2.77803	0.00546895	0.329907
14827	Pdia3	protein disulfide isomerase associated 3	ENSMUSG00000027248	6405.24	0.101344	0.0364508	2.7803	0.00543093	0.329907
229759	Olfm3	olfactomedin 3	ENSMUSG00000027965	738.375	0.140008	0.0504048	2.77767	0.00547497	0.329907
13518	Dst	dystonin	ENSMUSG00000026131	3604.15	0.110895	0.0400201	2.771	0.00558851	0.334291
12727	Clcn4	chloride channel, voltage-sensitive 4	ENSMUSG00000000605	7685.3	-0.0889465	0.0321683	-2.76503	0.0056917	0.337996
23948	Mmp17	matrix metallopeptidase 17	ENSMUSG00000029436	8879.35	-0.0897399	0.0325364	-2.75814	0.00581313	0.342724
192657	Ell2	elongation factor RNA polymerase II 2	ENSMUSG00000001542	515.227	0.137826	0.0501833	2.74644	0.00602451	0.352649
12305	Ddr1	discoidin domain receptor family, member 1	ENSMUSG00000003534	993.029	-0.126035	0.0459892	-2.74052	0.00613412	0.356519
26562	Ncdn	neurochondrin	ENSMUSG00000028833	98640.7	-0.0743936	0.0272128	-2.73378	0.00626128	0.361346
20972	Syngr1	synaptogyrin 1	ENSMUSG00000022415	25883.7	0.078466	0.0287482	2.72942	0.00634452	0.36359
14387	Gaa	glucosidase, alpha, acid	ENSMUSG00000025579	8393.43	-0.0939167	0.0345552	-2.71787	0.00657035	0.373917
21834	Thrb	thyroid hormone receptor beta	ENSMUSG00000021779	910.794	0.128087	0.0471953	2.71398	0.00664807	0.375731
12326	Camk4	calcium/calmodulin-dependent protein kinase IV	ENSMUSG00000038128	18903.8	0.090059	0.0332771	2.70634	0.006803	0.381853
216881	Wscd1	WSC domain containing 1	ENSMUSG00000020811	2189.17	-0.106501	0.0393907	-2.70371	0.00685709	0.382271
109169	Igip	IgA inducing protein	ENSMUSG00000110185	1400.1	0.125041	0.0463542	2.69752	0.00698588	0.386819
11603	Agrn	agrin	ENSMUSG00000041936	5476.57	-0.0919961	0.0341949	-2.69034	0.00713788	0.39257
18844	Plxna1	plexin A1	ENSMUSG00000030084	12727.6	-0.0890778	0.0331376	-2.68812	0.00718554	0.39257
242748	Disp3	dispatched RND transporter family member 3	ENSMUSG00000041544	873.299	-0.129847	0.0484786	-2.67844	0.00739651	0.40142
55984	Camkk1	calcium/calmodulin-dependent protein kinase kinase 1, alpha	ENSMUSG00000020785	3846.51	-0.109543	0.0410292	-2.66988	0.00758788	0.409097
12805	Cntn1	contactin 1	ENSMUSG00000055022	22440.7	-0.0834506	0.0312859	-2.66736	0.007645	0.409482
75786	Ckap5	cytoskeleton associated protein 5	ENSMUSG00000040549	3272.84	0.0996905	0.0375291	2.65635	0.00789909	0.410018
70974	Pgm2l1	phosphoglucomutase 2-like 1	ENSMUSG00000030729	30656	0.0779614	0.0293754	2.65397	0.00795519	0.410018
16956	Lpl	lipoprotein lipase	ENSMUSG00000015568	8661.88	0.119273	0.044924	2.65499	0.00793098	0.410018
103768	Tubg2	tubulin, gamma 2	ENSMUSG00000045007	1009.35	0.122917	0.0462798	2.65594	0.00790871	0.410018
NA	NA	NA	ENSMUSG00000029878	1314.84	0.122307	0.045955	2.66144	0.00778062	0.410018
223696	Tomm22	translocase of outer mitochondrial membrane 22 homolog (yeast)	ENSMUSG00000022427	976.506	0.12178	0.0458059	2.65862	0.0078461	0.410018
269608	Plekhg5	pleckstrin homology domain containing, family G (with RhoGef domain) member 5	ENSMUSG00000039713	3644.6	-0.103082	0.0389349	-2.64754	0.00810796	0.41528
243219	2900026A02Rik	RIKEN cDNA 2900026A02 gene	ENSMUSG00000051339	6385.29	-0.0896666	0.0339081	-2.6444	0.00818367	0.416554
69480	Ttc9	tetratricopeptide repeat domain 9	ENSMUSG00000042734	1433.52	0.119174	0.0451194	2.64131	0.00825854	0.41777
71904	Paqr7	progestin and adipoQ receptor family member VII	ENSMUSG00000037348	978.253	0.123679	0.0471334	2.62402	0.00868989	0.42599
67937	Tmem59l	transmembrane protein 59-like	ENSMUSG00000035964	8680.69	-0.125801	0.047805	-2.63154	0.00849978	0.42599
12351	Car4	carbonic anhydrase 4	ENSMUSG00000000805	647.951	-0.12844	0.0490172	-2.62031	0.00878491	0.42599
76626	Msi2	musashi RNA-binding protein 2	ENSMUSG00000069769	541.535	0.13153	0.0501873	2.62079	0.00877274	0.42599
207911	Mchr1	melanin-concentrating hormone receptor 1	ENSMUSG00000050164	911.246	-0.129679	0.0494026	-2.62494	0.00866654	0.42599
66725	Lrrk2	leucine-rich repeat kinase 2	ENSMUSG00000036273	513.858	-0.131908	0.050305	-2.62217	0.00873716	0.42599
78913	Ltn1	listerin E3 ubiquitin protein ligase 1	ENSMUSG00000052299	1476.91	-0.110094	0.0418612	-2.62998	0.00853892	0.42599
19281	Ptprt	protein tyrosine phosphatase, receptor type, T	ENSMUSG00000053141	1821.29	0.116602	0.0446217	2.61312	0.00897203	0.429975
20788	Srebf2	sterol regulatory element binding factor 2	ENSMUSG00000022463	8069.54	-0.0750671	0.0287107	-2.6146	0.00893313	0.429975
241118	Asic4	acid-sensing (proton-gated) ion channel family member 4	ENSMUSG00000033007	387.598	0.131097	0.050417	2.60025	0.00931565	0.430876
100034361	Mfap1b	microfibrillar-associated protein 1B	ENSMUSG00000048222	534.108	-0.131134	0.0503676	-2.60353	0.0092268	0.430876
11928	Atp1a1	ATPase, Na+/K+ transporting, alpha 1 polypeptide	ENSMUSG00000033161	24916.7	-0.0758409	0.0290663	-2.60924	0.00907442	0.430876
69352	Necab1	N-terminal EF-hand calcium binding protein 1	ENSMUSG00000040536	2170.65	0.119356	0.0459079	2.59991	0.00932483	0.430876
16353	Ipw	imprinted gene in the Prader-Willi syndrome region	ENSMUSG00000100826	608.434	0.130895	0.0504159	2.5963	0.00942338	0.430876
52480	Snhg14	small nucleolar RNA host gene 14	ENSMUSG00000100826	608.434	0.130895	0.0504159	2.5963	0.00942338	0.430876
380928	Lmo7	LIM domain only 7	ENSMUSG00000033060	3402.64	-0.0907922	0.0350216	-2.59246	0.00952909	0.430876
214058	Megf11	multiple EGF-like-domains 11	ENSMUSG00000036466	680.286	-0.129008	0.0497253	-2.59442	0.00947502	0.430876
76499	Clasp2	CLIP associating protein 2	ENSMUSG00000033392	10914.5	-0.0782019	0.0302291	-2.58697	0.0096823	0.430876
18013	Neurod2	neurogenic differentiation 2	ENSMUSG00000038255	7077.71	-0.0825384	0.0319181	-2.58594	0.00971141	0.430876
77480	Kidins220	kinase D-interacting substrate 220	ENSMUSG00000036333	9155.37	-0.0743966	0.0286132	-2.60008	0.0093201	0.430876
72393	Faim2	Fas apoptotic inhibitory molecule 2	ENSMUSG00000023011	8904.18	0.0878731	0.0339048	2.59176	0.00954856	0.430876
93708	Pcdhgc5	protocadherin gamma subfamily C, 5	ENSMUSG00000102543	4735.59	-0.106491	0.0411456	-2.58815	0.00964918	0.430876
68731	Rbfa	ribosome binding factor A	ENSMUSG00000024570	553.506	0.128436	0.0496774	2.58539	0.00972691	0.430876
278795	Lrrc10b	leucine rich repeat containing 10B	ENSMUSG00000090291	1216.37	-0.118551	0.0454685	-2.60732	0.00912542	0.430876
15460	Hr	hairless	ENSMUSG00000022096	961.565	-0.128645	0.0498067	-2.58288	0.00979788	0.431686
210293	Dock10	dedicator of cytokinesis 10	ENSMUSG00000038608	536.09	-0.129485	0.0502909	-2.57472	0.0100322	0.432111
12490	Cd34	CD34 antigen	ENSMUSG00000016494	969.737	0.12801	0.0496914	2.57609	0.00999247	0.432111
56177	Olfm1	olfactomedin 1	ENSMUSG00000026833	29978.7	-0.0727362	0.02827	-2.57291	0.0100847	0.432111
228536	Bahd1	bromo adjacent homology domain containing 1	ENSMUSG00000040007	2269.33	-0.101382	0.0393364	-2.57731	0.00995716	0.432111
235431	Coro2b	coronin, actin binding protein, 2B	ENSMUSG00000041729	8755.48	-0.0841872	0.0326734	-2.57663	0.00997686	0.432111
668212	Efr3b	EFR3 homolog B	ENSMUSG00000020658	8131.49	-0.0761862	0.0296264	-2.57157	0.0101239	0.432111
19736	Rgs4	regulator of G-protein signaling 4	ENSMUSG00000038530	10524.7	-0.0811533	0.0315961	-2.56846	0.010215	0.432298
110213	Tmbim6	transmembrane BAX inhibitor motif containing 6	ENSMUSG00000023010	5977.38	-0.0792681	0.0308697	-2.56783	0.0102338	0.432298
20515	Slc20a1	solute carrier family 20, member 1	ENSMUSG00000027397	1622.66	-0.119602	0.0467888	-2.55621	0.010582	0.433966
54667	Atp8b2	ATPase, class I, type 8B, member 2	ENSMUSG00000060671	1367.6	-0.118386	0.0463379	-2.55484	0.0106238	0.433966
387314	Tmtc1	transmembrane and tetratricopeptide repeat containing 1	ENSMUSG00000030306	1478.74	0.107463	0.0420729	2.55422	0.0106427	0.433966
116838	Rims2	regulating synaptic membrane exocytosis 2	ENSMUSG00000037386	2405.79	0.103463	0.0405076	2.55418	0.0106439	0.433966
77980	Sbf1	SET binding factor 1	ENSMUSG00000036529	8168.41	-0.0771301	0.03013	-2.55991	0.0104699	0.433966
207806	Usf3	upstream transcription factor family member 3	ENSMUSG00000068284	1682.6	0.11279	0.0440459	2.56073	0.0104453	0.433966
16528	Kcnk4	potassium channel, subfamily K, member 4	ENSMUSG00000024957	366.989	-0.129534	0.0505992	-2.56001	0.0104669	0.433966
17912	Myo1b	myosin IB	ENSMUSG00000018417	517.205	0.128741	0.0504593	2.55138	0.0107298	0.434959
16011	Igfbp5	insulin-like growth factor binding protein 5	ENSMUSG00000026185	1739.86	0.12001	0.0470805	2.54905	0.0108018	0.434959
12325	Camk2g	calcium/calmodulin-dependent protein kinase II gamma	ENSMUSG00000021820	4328.97	0.104081	0.0408448	2.54822	0.0108275	0.434959
19704	Upf1	UPF1 regulator of nonsense transcripts homolog (yeast)	ENSMUSG00000058301	2447.23	-0.108239	0.0426112	-2.54017	0.01108	0.43865
77519	Zfp266	zinc finger protein 266	ENSMUSG00000060510	825.838	-0.123742	0.0486507	-2.54348	0.0109753	0.43865
97761	Sgsm2	small G protein signaling modulator 2	ENSMUSG00000038351	2749.04	-0.0942811	0.0371071	-2.54079	0.0110604	0.43865
108682	Gpt2	glutamic pyruvate transaminase (alanine aminotransferase) 2	ENSMUSG00000031700	1334.47	-0.119751	0.0473782	-2.52756	0.011486	0.452536
23874	Farsb	phenylalanyl-tRNA synthetase, beta subunit	ENSMUSG00000026245	1655.63	-0.113826	0.0451434	-2.52143	0.011688	0.453949
216440	Os9	amplified in osteosarcoma	ENSMUSG00000040462	2774.74	0.0997396	0.0395356	2.52278	0.011643	0.453949
217082	Hlf	hepatic leukemia factor	ENSMUSG00000003949	2306.09	0.113874	0.0451298	2.52325	0.0116274	0.453949
23963	Tenm1	teneurin transmembrane protein 1	ENSMUSG00000016150	1491.96	0.108698	0.0431493	2.51912	0.0117648	0.454778
225849	Ppp2r5b	protein phosphatase 2, regulatory subunit B', beta	ENSMUSG00000024777	4387.39	-0.0922756	0.0367897	-2.50819	0.0121351	0.466889
103554	Psme4	proteasome (prosome, macropain) activator subunit 4	ENSMUSG00000040850	1007.64	-0.12012	0.047978	-2.50364	0.0122924	0.470728
223254	Farp1	FERM, RhoGEF (Arhgef) and pleckstrin domain protein 1 (chondrocyte-derived)	ENSMUSG00000025555	838.68	0.120937	0.0483397	2.50182	0.0123558	0.470958
19231	Ptma	prothymosin alpha	ENSMUSG00000026238	2615.66	-0.101424	0.040847	-2.48302	0.0130275	0.471205
18227	Nr4a2	nuclear receptor subfamily 4, group A, member 2	ENSMUSG00000026826	3469.06	0.0985282	0.0396891	2.4825	0.0130464	0.471205
20394	Scg5	secretogranin V	ENSMUSG00000023236	7534.83	0.0621108	0.0250282	2.48163	0.0130782	0.471205
20813	Srp14	signal recognition particle 14	ENSMUSG00000009549	1249.59	0.121941	0.0491984	2.47855	0.0131917	0.471205
29808	Mga	MAX gene associated	ENSMUSG00000033943	827.272	0.119717	0.0479902	2.49461	0.0126094	0.471205
76089	Rapgef2	Rap guanine nucleotide exchange factor (GEF) 2	ENSMUSG00000062232	6965.02	-0.0819175	0.0328727	-2.49196	0.012704	0.471205
109676	Ank2	ankyrin 2, brain	ENSMUSG00000032826	11397.9	0.0724328	0.0292111	2.47963	0.0131518	0.471205
56455	Dynll1	dynein light chain LC8-type 1	ENSMUSG00000009013	5476.29	-0.0849526	0.0343075	-2.47621	0.0132786	0.471205
103466	Nt5dc3	5'-nucleotidase domain containing 3	ENSMUSG00000054027	11512	-0.0748287	0.0301977	-2.47796	0.0132136	0.471205
102278	Cpne7	copine VII	ENSMUSG00000034796	7699.16	-0.0843462	0.033903	-2.48787	0.0128511	0.471205
14860	Gsta4	glutathione S-transferase, alpha 4	ENSMUSG00000032348	927.225	0.122285	0.0491035	2.49036	0.0127614	0.471205
13207	Ddx5	DEAD (Asp-Glu-Ala-Asp) box polypeptide 5	ENSMUSG00000020719	20938.1	-0.0681679	0.0274273	-2.4854	0.0129405	0.471205
94253	Hecw1	HECT, C2 and WW domain containing E3 ubiquitin protein ligase 1	ENSMUSG00000021301	1962.8	0.100633	0.04057	2.48048	0.0131207	0.471205
217480	Dgkb	diacylglycerol kinase, beta	ENSMUSG00000036095	7830.78	-0.0853363	0.0344639	-2.47611	0.0132823	0.471205
207304	Hectd1	HECT domain E3 ubiquitin protein ligase 1	ENSMUSG00000035247	4011.54	-0.0923885	0.0371645	-2.48594	0.0129211	0.471205
14167	Fgf12	fibroblast growth factor 12	ENSMUSG00000022523	2828.7	0.0972816	0.0391587	2.48429	0.0129809	0.471205
14396	Gabra3	gamma-aminobutyric acid (GABA) A receptor, subunit alpha 3	ENSMUSG00000031343	1897.66	0.105915	0.0428275	2.47306	0.0133962	0.473199
11852	Rhob	ras homolog family member B	ENSMUSG00000054364	9145.23	-0.0720565	0.0292255	-2.46553	0.013681	0.475068
11514	Adcy8	adenylate cyclase 8	ENSMUSG00000022376	754.65	0.120018	0.0486521	2.46687	0.0136302	0.475068
223732	Rtl6	retrotransposon Gag like 6	ENSMUSG00000055745	3589.5	-0.0877871	0.03558	-2.46732	0.013613	0.475068
268902	Robo2	roundabout guidance receptor 2	ENSMUSG00000052516	5087.75	0.0843301	0.0341412	2.47004	0.0135097	0.475068
73750	Whrn	whirlin	ENSMUSG00000039137	509.261	0.123713	0.0503241	2.45833	0.0139584	0.482655
66296	Haus2	HAUS augmin-like complex, subunit 2	ENSMUSG00000027285	559.67	-0.124248	0.0505854	-2.4562	0.0140416	0.483491
230674	Kdm4a	lysine (K)-specific demethylase 4A	ENSMUSG00000033326	1905.71	-0.102594	0.0418416	-2.45196	0.0142081	0.485146
72981	Thap12	THAP domain containing 12	ENSMUSG00000030753	1256.05	0.109231	0.0445477	2.45199	0.0142068	0.485146
12298	Cacnb4	calcium channel, voltage-dependent, beta 4 subunit	ENSMUSG00000017412	3595.27	0.089891	0.0368645	2.43842	0.0147518	0.49955
11658	Alcam	activated leukocyte cell adhesion molecule	ENSMUSG00000022636	2611.37	0.100531	0.0412247	2.43862	0.0147433	0.49955
18457	Bloc1s6	biogenesis of lysosomal organelles complex-1, subunit 6, pallidin	ENSMUSG00000005804	928.779	0.119133	0.04892	2.43526	0.0148812	0.501857
231659	Gcn1l1	GCN1 general control of amino-acid synthesis 1-like 1 (yeast)	ENSMUSG00000041638	1704.85	-0.102668	0.0422285	-2.43126	0.0150465	0.505353
268481	Krt222	keratin 222	ENSMUSG00000035849	1393.95	0.1038	0.0427446	2.42838	0.0151663	0.507296
20740	Sptan1	spectrin alpha, non-erythrocytic 1	ENSMUSG00000057738	16337	-0.0727953	0.030148	-2.4146	0.0157526	0.508238
99167	Ssx2ip	synovial sarcoma, X 2 interacting protein	ENSMUSG00000036825	4545.56	0.0883785	0.0364304	2.42595	0.0152683	0.508238
20563	Slit2	slit guidance ligand 2	ENSMUSG00000031558	1933.88	-0.105285	0.0434468	-2.42332	0.0153795	0.508238
15468	Prmt2	protein arginine N-methyltransferase 2	ENSMUSG00000020230	1837.23	-0.10393	0.0430242	-2.41563	0.0157082	0.508238
320563	Islr2	immunoglobulin superfamily containing leucine-rich repeat 2	ENSMUSG00000051243	9154.41	-0.0839803	0.0346752	-2.42191	0.0154391	0.508238
192786	Rapgef6	Rap guanine nucleotide exchange factor (GEF) 6	ENSMUSG00000037533	1069.06	-0.113835	0.0471236	-2.41568	0.015706	0.508238
72605	Car10	carbonic anhydrase 10	ENSMUSG00000056158	1251.12	0.117587	0.0486085	2.41907	0.0155604	0.508238
18708	Pik3r1	phosphoinositide-3-kinase regulatory subunit 1	ENSMUSG00000041417	3165.65	-0.0956393	0.0396029	-2.41495	0.0157372	0.508238
78929	Polr3h	polymerase (RNA) III (DNA directed) polypeptide H	ENSMUSG00000022476	588.505	-0.120863	0.0500215	-2.41623	0.0156823	0.508238
18143	Npas2	neuronal PAS domain protein 2	ENSMUSG00000026077	758.139	0.119963	0.0497425	2.41169	0.0158788	0.510303
242259	Slc44a5	solute carrier family 44, member 5	ENSMUSG00000028360	1244.9	-0.116672	0.0484334	-2.40891	0.0160002	0.512194
329628	Fat4	FAT atypical cadherin 4	ENSMUSG00000046743	763.244	0.116616	0.048497	2.40461	0.0161897	0.512258
11772	Ap2a2	adaptor-related protein complex 2, alpha 2 subunit	ENSMUSG00000002957	15919.4	-0.0731587	0.0304113	-2.40564	0.0161441	0.512258
12891	Cpne6	copine VI	ENSMUSG00000022212	22881.1	-0.065529	0.0272418	-2.40546	0.016152	0.512258
236899	Pcyt1b	phosphate cytidylyltransferase 1, choline, beta isoform	ENSMUSG00000035246	2473	0.0896387	0.0373725	2.39852	0.0164616	0.512938
14807	Grik3	glutamate receptor, ionotropic, kainate 3	ENSMUSG00000001985	1596.1	0.115836	0.0482594	2.40028	0.0163826	0.512938
13655	Egr3	early growth response 3	ENSMUSG00000033730	4805.59	-0.0942002	0.0392697	-2.3988	0.0164488	0.512938
NA	NA	NA	ENSMUSG00000112941	541.79	-0.121186	0.0504697	-2.40116	0.0163433	0.512938
235604	Camkv	CaM kinase-like vesicle-associated	ENSMUSG00000032936	27513.5	-0.0643946	0.0269011	-2.39375	0.0166769	0.51768
327826	Frs2	fibroblast growth factor receptor substrate 2	ENSMUSG00000020170	1029.62	-0.108851	0.0455369	-2.39039	0.0168304	0.520471
14155	Fem1b	feminization 1 homolog b (C. elegans)	ENSMUSG00000032244	6146.13	-0.0729664	0.0305438	-2.38891	0.0168984	0.520612
212712	Satb2	special AT-rich sequence binding protein 2	ENSMUSG00000038331	798.496	0.119741	0.0501679	2.38681	0.0169951	0.521628
228829	Phf20	PHD finger protein 20	ENSMUSG00000038116	1633.51	0.105291	0.0441467	2.38501	0.0170784	0.522231
14679	Gnai3	guanine nucleotide binding protein (G protein), alpha inhibiting 3	ENSMUSG00000000001	870.414	-0.111807	0.0469096	-2.38345	0.0171513	0.52251
228602	4930402H24Rik	RIKEN cDNA 4930402H24 gene	ENSMUSG00000027309	1321.63	0.109102	0.0458997	2.37697	0.0174553	0.526669
269536	Tex10	testis expressed gene 10	ENSMUSG00000028345	438.746	-0.119823	0.050421	-2.37644	0.0174807	0.526669
244654	Mtss1l	metastasis suppressor 1-like	ENSMUSG00000033763	2670.38	0.10795	0.0454117	2.37715	0.0174471	0.526669
17850	Mut	methylmalonyl-Coenzyme A mutase	ENSMUSG00000023921	805.79	-0.11869	0.0501047	-2.36885	0.0178436	0.535635
219257	Pcdh20	protocadherin 20	ENSMUSG00000050505	4557.42	-0.0903955	0.038254	-2.36304	0.0181259	0.542122
270058	Map1s	microtubule-associated protein 1S	ENSMUSG00000019261	2234.08	-0.0982639	0.0416451	-2.35955	0.0182969	0.545248
20402	Zfp106	zinc finger protein 106	ENSMUSG00000027288	4341.96	0.0870513	0.0369999	2.35275	0.0186353	0.549629
19679	Pitpnm2	phosphatidylinositol transfer protein, membrane-associated 2	ENSMUSG00000029406	6463.44	-0.0749597	0.0318469	-2.35375	0.0185851	0.549629
53901	Rcan2	regulator of calcineurin 2	ENSMUSG00000039601	621.287	0.118657	0.0504377	2.35255	0.0186451	0.549629
329178	Unc80	unc-80, NALCN activator	ENSMUSG00000055567	5105.04	0.0940385	0.0403209	2.33225	0.0196875	0.550792
14733	Gpc1	glypican 1	ENSMUSG00000034220	5679.23	-0.0893047	0.0381735	-2.33944	0.0193126	0.550792
66447	Mgst3	microsomal glutathione S-transferase 3	ENSMUSG00000026688	1590.82	0.104748	0.0446014	2.34853	0.0188477	0.550792
56772	Mllt11	myeloid/lymphoid or mixed-lineage leukemia; translocated to, 11	ENSMUSG00000053192	15633	0.0673161	0.0288239	2.33543	0.0195212	0.550792
110075	Bmp3	bone morphogenetic protein 3	ENSMUSG00000029335	339.695	0.117696	0.0505046	2.3304	0.019785	0.550792
320916	Wscd2	WSC domain containing 2	ENSMUSG00000063430	3786.96	-0.0856955	0.036576	-2.34294	0.0191322	0.550792
12443	Ccnd1	cyclin D1	ENSMUSG00000070348	763.408	-0.105163	0.045052	-2.33427	0.0195815	0.550792
234214	Sorbs2	sorbin and SH3 domain containing 2	ENSMUSG00000031626	2520.96	-0.0964585	0.0411168	-2.34596	0.018978	0.550792
212528	Trmt1	tRNA methyltransferase 1	ENSMUSG00000001909	780.291	0.111829	0.0480295	2.32833	0.0198944	0.550792
330817	Dhps	deoxyhypusine synthase	ENSMUSG00000060038	674.861	0.117935	0.0503976	2.34009	0.0192789	0.550792
219022	Ttc5	tetratricopeptide repeat domain 5	ENSMUSG00000006288	835.032	-0.11383	0.0485506	-2.34456	0.0190496	0.550792
239096	Cdh24	cadherin-like 24	ENSMUSG00000059674	351.307	-0.117755	0.0504965	-2.33195	0.0197034	0.550792
15551	Htr1b	5-hydroxytryptamine (serotonin) receptor 1B	ENSMUSG00000049511	409.635	0.118311	0.0505928	2.3385	0.0193611	0.550792
270190	Ephb1	Eph receptor B1	ENSMUSG00000032537	1331.1	-0.106118	0.0454997	-2.33228	0.0196857	0.550792
17433	Mobp	myelin-associated oligodendrocytic basic protein	ENSMUSG00000032517	847.983	0.115164	0.0493162	2.33522	0.0195318	0.550792
72349	Dusp3	dual specificity phosphatase 3 (vaccinia virus phosphatase VH1-related)	ENSMUSG00000003518	5698.04	-0.0710287	0.0305043	-2.32848	0.0198866	0.550792
24050	2022-09-03	septin 3	ENSMUSG00000022456	16727.5	0.0742855	0.0318618	2.33149	0.0197275	0.550792
17254	Slc3a2	solute carrier family 3 (activators of dibasic and neutral amino acid transport), member 2	ENSMUSG00000010095	2903.31	0.0835507	0.0356539	2.34338	0.0191097	0.550792
215008	Vezt	vezatin, adherens junctions transmembrane protein	ENSMUSG00000036099	1671.32	0.100012	0.0429926	2.32626	0.0200049	0.551987
11639	Ak4	adenylate kinase 4	ENSMUSG00000028527	2700.48	-0.100349	0.0432916	-2.31798	0.0204506	0.562393
100710	Pds5b	PDS5 cohesin associated factor B	ENSMUSG00000034021	2750.16	-0.0884267	0.0381851	-2.31574	0.0205727	0.563856
269060	Dagla	diacylglycerol lipase, alpha	ENSMUSG00000035735	8268.15	-0.0755681	0.0327232	-2.30932	0.0209261	0.57163
347740	2900097C17Rik	RIKEN cDNA 2900097C17 gene	ENSMUSG00000102869	16507	0.0744485	0.032307	2.30441	0.0211997	0.57527
16443	Itsn1	intersectin 1 (SH3 domain protein 1A)	ENSMUSG00000022957	4383.79	0.0824983	0.0357847	2.30541	0.0211438	0.57527
22284	Usp9x	ubiquitin specific peptidase 9, X chromosome	ENSMUSG00000031010	3977.77	-0.084424	0.0367593	-2.29667	0.0216376	0.576127
11835	Ar	androgen receptor	ENSMUSG00000046532	890.213	0.107108	0.046559	2.30048	0.0214213	0.576127
100072	Camta1	calmodulin binding transcription activator 1	ENSMUSG00000014592	11507.9	-0.0634555	0.0275976	-2.29932	0.0214869	0.576127
57423	Atp5j2	ATP synthase, H+ transporting, mitochondrial F0 complex, subunit F2	ENSMUSG00000038690	1433.23	0.0972531	0.0422433	2.30222	0.021323	0.576127
81904	Cacng7	calcium channel, voltage-dependent, gamma subunit 7	ENSMUSG00000069806	1356.35	0.0992928	0.0432081	2.29802	0.0215609	0.576127
NA	NA	NA	ENSMUSG00000085133	966.386	0.113085	0.0492445	2.2964	0.0216531	0.576127
75599	Pcdh1	protocadherin 1	ENSMUSG00000051375	19294.8	-0.062632	0.0273005	-2.29417	0.0217808	0.577649
217893	Pacs2	phosphofurin acidic cluster sorting protein 2	ENSMUSG00000021143	2723.6	0.0934093	0.0407805	2.29054	0.02199	0.581317
17222	Anapc1	anaphase promoting complex subunit 1	ENSMUSG00000014355	2605.79	-0.0913672	0.0399522	-2.28691	0.0222009	0.581952
20393	Sgk1	serum/glucocorticoid regulated kinase 1	ENSMUSG00000019970	1506.9	-0.102585	0.0448395	-2.28783	0.0221475	0.581952
215085	Slc35f1	solute carrier family 35, member F1	ENSMUSG00000038602	1643.8	0.10488	0.0458699	2.28646	0.0222271	0.581952
110784	Nr3c2	nuclear receptor subfamily 3, group C, member 2	ENSMUSG00000031618	7651.17	-0.0846206	0.0370457	-2.28422	0.0223586	0.582349
56531	Ylpm1	YLP motif containing 1	ENSMUSG00000021244	3163.82	0.0958376	0.0419644	2.28378	0.0223844	0.582349
99375	Cul4a	cullin 4A	ENSMUSG00000031446	2061.56	-0.0894963	0.0392991	-2.27731	0.0227678	0.583138
53376	Usp2	ubiquitin specific peptidase 2	ENSMUSG00000032010	1615.82	0.102934	0.045168	2.27891	0.0226723	0.583138
223601	Fam49b	family with sequence similarity 49, member B	ENSMUSG00000022378	3948.11	0.0784358	0.034443	2.27726	0.0227705	0.583138
494448	Cbx6	chromobox 6	ENSMUSG00000089715	23787.6	-0.06279	0.0275339	-2.28046	0.0225803	0.583138
69029	Smdt1	single-pass membrane protein with aspartate rich tail 1	ENSMUSG00000022452	631.309	-0.113334	0.0497377	-2.27865	0.0226882	0.583138
230784	Sesn2	sestrin 2	ENSMUSG00000028893	737.461	-0.11362	0.0500448	-2.27037	0.0231854	0.588249
71835	Lancl2	LanC (bacterial lantibiotic synthetase component C)-like 2	ENSMUSG00000062190	3622.31	-0.0773259	0.0340418	-2.2715	0.0231169	0.588249
237847	Rtn4rl1	reticulon 4 receptor-like 1	ENSMUSG00000045287	3342.97	-0.0834447	0.0367307	-2.2718	0.0230989	0.588249
68666	Svop	SV2 related protein	ENSMUSG00000042078	6751.74	-0.0716377	0.0315844	-2.26813	0.023321	0.589864
20720	Serpine2	serine (or cysteine) peptidase inhibitor, clade E, member 2	ENSMUSG00000026249	1025.89	0.103103	0.0457785	2.25222	0.0243083	0.600019
319996	Casc4	cancer susceptibility candidate 4	ENSMUSG00000060227	2515.62	0.0875701	0.0387837	2.25791	0.0239511	0.600019
77113	Klhl2	kelch-like 2, Mayven	ENSMUSG00000031605	9287.31	-0.0874246	0.0387074	-2.2586	0.0239082	0.600019
15898	Icam5	intercellular adhesion molecule 5, telencephalin	ENSMUSG00000032174	15090.3	-0.0671424	0.029756	-2.25643	0.0240435	0.600019
19684	Rdx	radixin	ENSMUSG00000032050	1410.32	-0.103289	0.0458576	-2.25239	0.0242974	0.600019
13855	Epn2	epsin 2	ENSMUSG00000001036	4088.25	-0.0799776	0.0354817	-2.25405	0.0241928	0.600019
14958	H1f0	H1 histone family, member 0	ENSMUSG00000096210	1820.7	0.0930684	0.0412361	2.25696	0.0240104	0.600019
66513	Tab1	TGF-beta activated kinase 1/MAP3K7 binding protein 1	ENSMUSG00000022414	666.107	-0.110763	0.0491416	-2.25396	0.0241989	0.600019
12858	Cox5a	cytochrome c oxidase subunit Va	ENSMUSG00000000088	3398.74	0.0922044	0.0410084	2.24843	0.0245491	0.603744
20562	Slit1	slit guidance ligand 1	ENSMUSG00000025020	8512.69	-0.0712688	0.0317099	-2.24752	0.0246065	0.603744
58178	Sorcs1	sortilin-related VPS10 domain containing receptor 1	ENSMUSG00000043531	359.365	0.113589	0.0505764	2.24589	0.024711	0.604498
12010	B2m	beta-2 microglobulin	ENSMUSG00000060802	523.483	-0.0795811	0.035488	-2.24248	0.0249305	0.608051
68507	Ppfia4	protein tyrosine phosphatase, receptor type, f polypeptide (PTPRF), interacting protein (liprin), alpha 4	ENSMUSG00000026458	4731.61	-0.0791259	0.0354236	-2.2337	0.0255027	0.620162
72500	Ier5l	immediate early response 5-like	ENSMUSG00000089762	330.766	-0.111954	0.0501479	-2.23247	0.0255839	0.620295
245450	Slitrk2	SLIT and NTRK-like family, member 2	ENSMUSG00000036790	742.506	-0.108852	0.0488634	-2.22768	0.0259018	0.621987
57816	Tesc	tescalcin	ENSMUSG00000029359	852.938	-0.109704	0.0492633	-2.22688	0.0259551	0.621987
16885	Limk1	LIM-domain containing, protein kinase	ENSMUSG00000029674	1151.76	0.106553	0.0478493	2.22685	0.0259572	0.621987
24056	Sh3bp5	SH3-domain binding protein 5 (BTK-associated)	ENSMUSG00000021892	4976.43	-0.075577	0.0339126	-2.22858	0.0258418	0.621987
665775	Bod1l	biorientation of chromosomes in cell division 1-like	ENSMUSG00000061755	1339.5	0.100407	0.045137	2.2245	0.0261146	0.623934
98660	Atp1a2	ATPase, Na+/K+ transporting, alpha 2 polypeptide	ENSMUSG00000007097	980.205	0.104372	0.047057	2.218	0.0265549	0.632609
208727	Hdac4	histone deacetylase 4	ENSMUSG00000026313	2465.68	-0.090672	0.0410341	-2.20968	0.0271276	0.640665
77038	Arfgap2	ADP-ribosylation factor GTPase activating protein 2	ENSMUSG00000027255	1696.46	-0.0912862	0.0413004	-2.2103	0.0270845	0.640665
414077	Wdr83os	WD repeat domain 83 opposite strand	ENSMUSG00000059355	465.07	-0.111858	0.0505901	-2.21107	0.0270311	0.640665
100040052	Gm2573	predicted gene 2573	ENSMUSG00000059355	465.07	-0.111858	0.0505901	-2.21107	0.0270311	0.640665
78283	Map7d2	MAP7 domain containing 2	ENSMUSG00000041020	5679.15	0.0725556	0.0328645	2.20772	0.0272637	0.64203
225872	Npas4	neuronal PAS domain protein 4	ENSMUSG00000045903	579.654	-0.111135	0.0503706	-2.20634	0.0273601	0.642452
217194	Klhl11	kelch-like 11	ENSMUSG00000048732	736.908	-0.107252	0.0486579	-2.20421	0.0275095	0.644115
243548	Prickle2	prickle planar cell polarity protein 2	ENSMUSG00000030020	15016.5	-0.0730761	0.0331805	-2.20238	0.0276387	0.645297
432530	Adcy1	adenylate cyclase 1	ENSMUSG00000020431	21315.3	0.0686725	0.0312077	2.2005	0.0277715	0.646556
19277	Ptpro	protein tyrosine phosphatase, receptor type, O	ENSMUSG00000030223	2078.17	-0.0877093	0.0399025	-2.19809	0.0279428	0.648701
243339	Tmem130	transmembrane protein 130	ENSMUSG00000043388	5153.44	0.0751485	0.0342307	2.19535	0.0281383	0.651279
12337	Capn5	calpain 5	ENSMUSG00000035547	4037.62	0.0774574	0.0353126	2.19347	0.0282732	0.651279
12554	Cdh13	cadherin 13	ENSMUSG00000031841	2211.28	0.098636	0.0449734	2.19321	0.0282923	0.651279
231051	Kmt2c	lysine (K)-specific methyltransferase 2C	ENSMUSG00000038056	1772.29	0.0930951	0.0424727	2.19188	0.0283882	0.651655
67608	Narf	nuclear prelamin A recognition factor	ENSMUSG00000000056	2668.72	0.0814683	0.0372025	2.18986	0.0285344	0.653182
12227	Btg2	B cell translocation gene 2, anti-proliferative	ENSMUSG00000020423	374.805	-0.105095	0.0482874	-2.17645	0.0295219	0.653376
20502	Slc16a2	solute carrier family 16 (monocarboxylic acid transporters), member 2	ENSMUSG00000033965	3150.71	0.0806219	0.0372715	2.1631	0.0305337	0.653376
22589	Atrx	ATRX, chromatin remodeler	ENSMUSG00000031229	1651.31	0.0984233	0.0455427	2.16112	0.030686	0.653376
230316	Megf9	multiple EGF-like-domains 9	ENSMUSG00000039270	5526.66	0.0680491	0.0312787	2.17557	0.0295874	0.653376
72754	Arhgef10l	Rho guanine nucleotide exchange factor (GEF) 10-like	ENSMUSG00000040964	642.319	-0.107955	0.0495972	-2.17664	0.0295074	0.653376
269642	Nat8l	N-acetyltransferase 8-like	ENSMUSG00000048142	7225.52	0.0638909	0.0295297	2.16362	0.0304937	0.653376
13839	Epha5	Eph receptor A5	ENSMUSG00000029245	8845.61	0.0760254	0.0350537	2.16883	0.0300959	0.653376
12123	Hrk	harakiri, BCL2 interacting protein (contains only BH3 domain)	ENSMUSG00000046607	2366.15	-0.0922684	0.0422533	-2.18369	0.0289847	0.653376
105247240	Gm42372	predicted gene, 42372	ENSMUSG00000108348	3961.17	-0.0780492	0.0358119	-2.17942	0.0293007	0.653376
216154	Med16	mediator complex subunit 16	ENSMUSG00000013833	1837.66	-0.0864812	0.0398092	-2.17239	0.0298261	0.653376
70885	Ints10	integrator complex subunit 10	ENSMUSG00000031864	1060.34	-0.107687	0.0496871	-2.1673	0.0302123	0.653376
15571	Elavl3	ELAV like RNA binding protein 3	ENSMUSG00000003410	9567.76	0.0637749	0.0295118	2.161	0.0306955	0.653376
50876	Tmod2	tropomodulin 2	ENSMUSG00000032186	20205.3	0.0796326	0.0367821	2.16498	0.0303889	0.653376
22063	Trpc1	transient receptor potential cation channel, subfamily C, member 1	ENSMUSG00000032839	1788.75	-0.0892647	0.0412053	-2.16634	0.0302851	0.653376
19944	Rpl29	ribosomal protein L29	ENSMUSG00000048758	1216.61	0.0988191	0.0455399	2.16995	0.0300108	0.653376
666642	Gm8210	predicted pseudogene 8210	ENSMUSG00000048758	1216.61	0.0988191	0.0455399	2.16995	0.0300108	0.653376
75909	Vmp1	vacuole membrane protein 1	ENSMUSG00000018171	2753.51	-0.0823583	0.0376902	-2.18514	0.0288785	0.653376
217154	Stac2	SH3 and cysteine rich domain 2	ENSMUSG00000017400	978.311	-0.103765	0.047654	-2.17746	0.0294466	0.653376
13384	Mpp3	membrane protein, palmitoylated 3 (MAGUK p55 subfamily member 3)	ENSMUSG00000052373	2430.92	-0.0819301	0.0379012	-2.16168	0.0306431	0.653376
27404	Abca8b	ATP-binding cassette, sub-family A (ABC1), member 8b	ENSMUSG00000020620	670.389	-0.106361	0.0487087	-2.18361	0.0289909	0.653376
328329	Mast4	microtubule associated serine/threonine kinase family member 4	ENSMUSG00000034751	1423.02	-0.0961651	0.0443655	-2.16756	0.030192	0.653376
218544	Sgtb	small glutamine-rich tetratricopeptide repeat (TPR)-containing, beta	ENSMUSG00000042743	2898.31	0.0800703	0.0367376	2.17952	0.0292929	0.653376
224020	Pi4ka	phosphatidylinositol 4-kinase alpha	ENSMUSG00000041720	7243.01	-0.0659508	0.0304357	-2.16689	0.0302434	0.653376
66972	Slc25a23	solute carrier family 25 (mitochondrial carrier; phosphate carrier), member 23	ENSMUSG00000046329	7287.63	0.0753489	0.0345782	2.17908	0.0293254	0.653376
20358	Sema6a	sema domain, transmembrane domain (TM), and cytoplasmic domain, (semaphorin) 6A	ENSMUSG00000019647	480.4	0.110078	0.0504872	2.18031	0.0292345	0.653376
14109	Fau	Finkel-Biskis-Reilly murine sarcoma virus (FBR-MuSV) ubiquitously expressed (fox derived)	ENSMUSG00000038274	1286.33	-0.102856	0.0473625	-2.17168	0.0298801	0.653376
72727	B3gat3	beta-1,3-glucuronyltransferase 3 (glucuronosyltransferase I)	ENSMUSG00000071649	1797.1	0.0894415	0.0409877	2.18216	0.029098	0.653376
226252	Fam160b1	family with sequence similarity 160, member B1	ENSMUSG00000033478	899.304	-0.102867	0.0472702	-2.17614	0.0295449	0.653376
228355	Madd	MAP-kinase activating death domain	ENSMUSG00000040687	8986.84	-0.06534	0.0302799	-2.15787	0.0309381	0.655063
13004	Ncan	neurocan	ENSMUSG00000002341	9000.94	-0.107475	0.0498229	-2.15713	0.0309952	0.655063
17388	Mmp15	matrix metallopeptidase 15	ENSMUSG00000031790	453.266	0.108233	0.0501803	2.15689	0.0310146	0.655063
78779	Spata2l	spermatogenesis associated 2-like	ENSMUSG00000033594	3060.82	-0.0795676	0.0369611	-2.15274	0.0313391	0.660217
75668	Rasl10a	RAS-like, family 10, member A	ENSMUSG00000034209	628.169	-0.106944	0.0498319	-2.14609	0.0318658	0.66959
66606	Lrrc57	leucine rich repeat containing 57	ENSMUSG00000027286	566.346	-0.106946	0.0499862	-2.1395	0.032395	0.678969
76829	Dok5	docking protein 5	ENSMUSG00000027560	527.361	0.107804	0.0505678	2.13188	0.0330171	0.688487
216505	Pik3ip1	phosphoinositide-3-kinase interacting protein 1	ENSMUSG00000034614	397.564	-0.107874	0.0505916	-2.13224	0.0329868	0.688487
14043	Ext2	exostoses (multiple) 2	ENSMUSG00000027198	1163.53	0.098524	0.0463505	2.12563	0.0335343	0.689203
19266	Ptprd	protein tyrosine phosphatase, receptor type, D	ENSMUSG00000028399	4152.14	0.0824393	0.0387666	2.12655	0.0334572	0.689203
319277	Washc4	WASH complex subunit 4	ENSMUSG00000034560	710.025	-0.102771	0.048247	-2.13011	0.0331627	0.689203
54446	Nfat5	nuclear factor of activated T cells 5	ENSMUSG00000003847	1617.78	0.0947159	0.0445645	2.12537	0.0335561	0.689203
170571	Cntnap4	contactin associated protein-like 4	ENSMUSG00000031772	522.307	0.106246	0.0499713	2.12614	0.0334915	0.689203
382034	Gse1	genetic suppressor element 1, coiled-coil protein	ENSMUSG00000031822	4581.58	-0.0832337	0.0390976	-2.12887	0.0332651	0.689203
17873	Gadd45b	growth arrest and DNA-damage-inducible 45 beta	ENSMUSG00000015312	414.956	-0.107365	0.0505697	-2.12311	0.0337445	0.69134
218194	Phactr1	phosphatase and actin regulator 1	ENSMUSG00000054728	14976.5	0.0588423	0.0277548	2.12008	0.0339996	0.69483
11426	Macf1	microtubule-actin crosslinking factor 1	ENSMUSG00000028649	2551.97	0.0876672	0.0413798	2.1186	0.0341242	0.695641
100502846	Gm19410	predicted gene, 19410	ENSMUSG00000109372	1099.18	-0.102088	0.0482356	-2.11644	0.0343073	0.696497
29858	Pmm1	phosphomannomutase 1	ENSMUSG00000022474	2251.29	0.0862999	0.0407825	2.1161	0.0343362	0.696497
16589	Uhmk1	U2AF homology motif (UHM) kinase 1	ENSMUSG00000026667	11961.2	0.0702451	0.033283	2.11054	0.034812	0.702671
14788	Gpr162	G protein-coupled receptor 162	ENSMUSG00000038390	4601.63	-0.0766543	0.0363123	-2.11097	0.0347746	0.702671
26407	Map3k4	mitogen-activated protein kinase kinase kinase 4	ENSMUSG00000014426	787.286	-0.100472	0.0476446	-2.10878	0.0349637	0.703999
11800	Api5	apoptosis inhibitor 5	ENSMUSG00000027193	2063.63	-0.0847023	0.0402471	-2.10456	0.0353298	0.709165
107831	Adgrb1	adhesion G protein-coupled receptor B1	ENSMUSG00000034730	11948.4	-0.0590627	0.0280739	-2.10383	0.0353934	0.709165
72042	Cotl1	coactosin-like 1 (Dictyostelium)	ENSMUSG00000031827	1831.12	-0.0851274	0.0405075	-2.10152	0.0355953	0.711471
74211	1700017B05Rik	RIKEN cDNA 1700017B05 gene	ENSMUSG00000032300	852.004	-0.0994941	0.0474357	-2.09745	0.0359536	0.716884
675812	Zfp605	zinc finger protein 605	ENSMUSG00000023284	493.445	-0.0664806	0.0317196	-2.09589	0.0360923	0.717905
105445	Dock9	dedicator of cytokinesis 9	ENSMUSG00000025558	12890.2	-0.0593805	0.0283603	-2.09379	0.0362788	0.719866
56695	Pnkd	paroxysmal nonkinesiogenic dyskinesia	ENSMUSG00000026179	5402.79	0.0774498	0.0370193	2.09215	0.0364252	0.720734
11750	Anxa7	annexin A7	ENSMUSG00000021814	2552.67	0.0795589	0.0380423	2.09133	0.0364984	0.720734
14395	Gabra2	gamma-aminobutyric acid (GABA) A receptor, subunit alpha 2	ENSMUSG00000000560	7650.05	0.0876923	0.0419728	2.08927	0.0366836	0.722649
23797	Akt3	thymoma viral proto-oncogene 3	ENSMUSG00000019699	9421.78	0.0711927	0.0341397	2.08534	0.0370389	0.726157
381489	Rxfp1	relaxin/insulin-like family peptide receptor 1	ENSMUSG00000034009	474.277	0.104316	0.0500126	2.0858	0.036997	0.726157
237213	Glra2	glycine receptor, alpha 2 subunit	ENSMUSG00000018589	450.961	0.105427	0.0505989	2.08358	0.0371982	0.727541
66199	Commd4	COMM domain containing 4	ENSMUSG00000032299	445.521	-0.104823	0.0503734	-2.08091	0.0374421	0.730567
381022	Kmt2d	lysine (K)-specific methyltransferase 2D	ENSMUSG00000048154	1791.45	0.0937168	0.0450904	2.07842	0.0376705	0.733278
16531	Kcnma1	potassium large conductance calcium-activated channel, subfamily M, alpha member 1	ENSMUSG00000063142	9047.87	0.0696889	0.0335487	2.07725	0.0377789	0.733644
18187	Nrp2	neuropilin 2	ENSMUSG00000025969	3877.06	0.0736268	0.035546	2.07131	0.0383296	0.73461
54216	Pcdh7	protocadherin 7	ENSMUSG00000029108	2686.13	0.077825	0.037516	2.07445	0.0380379	0.73461
74596	Cds1	CDP-diacylglycerol synthase 1	ENSMUSG00000029330	2669.11	0.0787659	0.0380043	2.07255	0.0382141	0.73461
73178	Wasl	Wiskott-Aldrich syndrome-like (human)	ENSMUSG00000029684	4430.03	0.0756466	0.0365473	2.06983	0.0384683	0.73461
50934	Slc7a8	solute carrier family 7 (cationic amino acid transporter, y+ system), member 8	ENSMUSG00000022180	4376.49	0.0733809	0.0355022	2.06694	0.0387397	0.73461
69642	Mlip	muscular LMNA-interacting protein	ENSMUSG00000032355	1007.07	0.0976637	0.0472447	2.06719	0.0387161	0.73461
72503	2610507B11Rik	RIKEN cDNA 2610507B11 gene	ENSMUSG00000010277	7939.6	0.0661446	0.0320135	2.06615	0.0388147	0.73461
105348	Golm1	golgi membrane protein 1	ENSMUSG00000021556	2134.17	-0.0842412	0.0407246	-2.06856	0.0385874	0.73461
13803	Enc1	ectodermal-neural cortex 1	ENSMUSG00000041773	45255.5	-0.0571631	0.0276168	-2.06987	0.0384646	0.73461
56784	Ralgapa1	Ral GTPase activating protein, alpha subunit 1	ENSMUSG00000021027	2757.15	-0.0782934	0.0377802	-2.07234	0.0382339	0.73461
20743	Sptbn2	spectrin beta, non-erythrocytic 2	ENSMUSG00000067889	21225.1	-0.098607	0.0476573	-2.06908	0.0385382	0.73461
319998	Tmem198	transmembrane protein 198	ENSMUSG00000051703	1758.42	-0.0824381	0.0401892	-2.05125	0.0402426	0.735063
227325	Dner	delta/notch-like EGF repeat containing	ENSMUSG00000036766	5630.65	0.0682878	0.0331338	2.06097	0.039306	0.735063
12064	Bdnf	brain derived neurotrophic factor	ENSMUSG00000048482	2054.29	-0.0823728	0.040011	-2.05875	0.0395178	0.735063
22234	Ugcg	UDP-glucose ceramide glucosyltransferase	ENSMUSG00000028381	2432.9	0.0779314	0.0379769	2.05207	0.0401624	0.735063
69863	Ttc39b	tetratricopeptide repeat domain 39B	ENSMUSG00000038172	1278.37	0.0924379	0.0449573	2.05613	0.0397704	0.735063
52850	Sgsm1	small G protein signaling modulator 1	ENSMUSG00000042216	2993.92	-0.0790995	0.0383337	-2.06344	0.0390704	0.735063
109205	Sobp	sine oculis binding protein	ENSMUSG00000038248	5278.57	0.0663855	0.0323972	2.04911	0.0404511	0.735063
12931	Crlf1	cytokine receptor-like factor 1	ENSMUSG00000007888	430.625	-0.103616	0.0505256	-2.05076	0.0402903	0.735063
101943	Sf3b3	splicing factor 3b, subunit 3	ENSMUSG00000033732	2833.9	-0.082165	0.0400032	-2.05396	0.0399792	0.735063
244668	Sipa1l2	signal-induced proliferation-associated 1 like 2	ENSMUSG00000001995	1403.31	-0.0891535	0.0431963	-2.06392	0.0390256	0.735063
76898	B3gat1	beta-1,3-glucuronyltransferase 1 (glucuronosyltransferase P)	ENSMUSG00000045994	7977.47	0.0669576	0.0326638	2.0499	0.0403741	0.735063
20255	Scg3	secretogranin III	ENSMUSG00000032181	3255.07	0.0764399	0.0371487	2.05767	0.0396214	0.735063
244954	Prss35	protease, serine 35	ENSMUSG00000033491	700.1	-0.103188	0.0502878	-2.05196	0.040174	0.735063
12387	Ctnnb1	catenin (cadherin associated protein), beta 1	ENSMUSG00000006932	22064.4	-0.0590957	0.0286692	-2.06129	0.0392749	0.735063
218543	Srek1	splicing regulatory glutamine/lysine-rich protein 1	ENSMUSG00000032621	1318.74	-0.091611	0.0447081	-2.04909	0.0404531	0.735063
20384	Srsf5	serine/arginine-rich splicing factor 5	ENSMUSG00000021134	2492.43	-0.0826295	0.0401305	-2.05902	0.0394922	0.735063
238330	Irf2bpl	interferon regulatory factor 2 binding protein-like	ENSMUSG00000034168	2749.62	-0.080984	0.0392598	-2.06277	0.0391343	0.735063
207683	Igsf11	immunoglobulin superfamily, member 11	ENSMUSG00000022790	509.243	0.10224	0.0498915	2.04926	0.0404371	0.735063
19225	Ptgs2	prostaglandin-endoperoxide synthase 2	ENSMUSG00000032487	1293.48	-0.0940367	0.0459357	-2.04714	0.0406443	0.736903
74427	Eaf1	ELL associated factor 1	ENSMUSG00000021890	418.929	-0.103053	0.0505271	-2.03956	0.0413945	0.748848
53416	Stk39	serine/threonine kinase 39	ENSMUSG00000027030	1638.33	0.0855093	0.0419737	2.03721	0.0416287	0.749217
14538	Gcnt2	glucosaminyl (N-acetyl) transferase 2, I-branching enzyme	ENSMUSG00000021360	739.417	-0.097952	0.0480712	-2.03764	0.0415855	0.749217
21847	Klf10	Kruppel-like factor 10	ENSMUSG00000037465	1589.87	-0.0904656	0.0444197	-2.03661	0.0416892	0.749217
381353	Gm996	predicted gene 996	ENSMUSG00000029419	4954.06	-0.0672173	0.0330328	-2.03486	0.0418646	0.750631
75415	Arhgap12	Rho GTPase activating protein 12	ENSMUSG00000041225	2105.18	0.0837564	0.0411781	2.03401	0.0419511	0.750631
245555	Nexmif	neurite extension and migration factor	ENSMUSG00000046449	2738.95	0.0794651	0.0391785	2.02829	0.0425311	0.759352
101490	Inpp5f	inositol polyphosphate-5-phosphatase F	ENSMUSG00000042105	4437.36	0.0760459	0.0375978	2.02262	0.0431128	0.766397
19014	Med1	mediator complex subunit 1	ENSMUSG00000018160	1416.01	-0.0903156	0.0446372	-2.02332	0.0430397	0.766397
93716	Pcdhga8	protocadherin gamma subfamily A, 8	ENSMUSG00000103897	422.582	-0.102233	0.0505948	-2.02063	0.043318	0.768379
56030	Tmem131	transmembrane protein 131	ENSMUSG00000026116	2069.44	-0.080848	0.0400569	-2.01833	0.043557	0.770949
17847	Usp34	ubiquitin specific peptidase 34	ENSMUSG00000056342	3984.71	0.073756	0.0366306	2.01351	0.0440612	0.777369
192231	Hexim1	hexamethylene bis-acetamide inducible 1	ENSMUSG00000048878	2246.65	-0.0821878	0.0408275	-2.01305	0.0441094	0.777369
73251	Setd7	SET domain containing (lysine methyltransferase) 7	ENSMUSG00000037111	5791.6	-0.0795111	0.0396393	-2.00587	0.0448706	0.778808
70747	Tspan2	tetraspanin 2	ENSMUSG00000027858	454.782	0.101066	0.0504067	2.005	0.0449628	0.778808
57741	Noc2l	NOC2 like nucleolar associated transcriptional repressor	ENSMUSG00000095567	1600.37	0.0970324	0.0483825	2.00553	0.0449068	0.778808
665180	Clec2l	C-type lectin domain family 2, member L	ENSMUSG00000079598	1441.94	0.0871503	0.0434781	2.00447	0.0450202	0.778808
234388	Ccdc124	coiled-coil domain containing 124	ENSMUSG00000007721	1303.75	-0.0989224	0.0492619	-2.00809	0.0446336	0.778808
19341	Rab4a	RAB4A, member RAS oncogene family	ENSMUSG00000019478	749.799	0.0986978	0.0490855	2.01073	0.0443535	0.778808
246710	Rhobtb2	Rho-related BTB domain containing 2	ENSMUSG00000022075	2406.86	0.0784029	0.0390436	2.00809	0.0446341	0.778808
244745	Dpy19l1	dpy-19-like 1 (C. elegans)	ENSMUSG00000043067	1102.02	0.0932983	0.0464481	2.00866	0.0445732	0.778808
75580	Zbtb4	zinc finger and BTB domain containing 4	ENSMUSG00000018750	3150.26	-0.0711184	0.0354843	-2.00422	0.0450464	0.778808
18028	Nfib	nuclear factor I/B	ENSMUSG00000008575	5123.28	-0.0631441	0.0315197	-2.00333	0.0451424	0.778825
19419	Rasgrp1	RAS guanyl releasing protein 1	ENSMUSG00000027347	30399.8	-0.092905	0.0464648	-1.99947	0.0455573	0.779196
20336	Exoc4	exocyst complex component 4	ENSMUSG00000029763	2528.34	-0.0800718	0.0401105	-1.99628	0.0459035	0.779196
30853	Mlf2	myeloid leukemia factor 2	ENSMUSG00000030120	14195	-0.0577263	0.028923	-1.99586	0.0459489	0.779196
18213	Ntrk3	neurotrophic tyrosine kinase, receptor, type 3	ENSMUSG00000059146	6473.8	0.0727751	0.0363759	2.00064	0.0454309	0.779196
414121	E430016F16Rik	RIKEN cDNA E430016F16 gene	ENSMUSG00000059146	6473.8	0.0727751	0.0363759	2.00064	0.0454309	0.779196
71310	Tbc1d9	TBC1 domain family, member 9	ENSMUSG00000031709	3701.92	-0.0710032	0.0355586	-1.99679	0.0458477	0.779196
66590	Farsa	phenylalanyl-tRNA synthetase, alpha subunit	ENSMUSG00000003808	853.293	0.0996967	0.0497955	2.00212	0.0452715	0.779196
14802	Gria4	glutamate receptor, ionotropic, AMPA4 (alpha 4)	ENSMUSG00000025892	881.118	0.0958551	0.0480425	1.99521	0.0460196	0.779196
20918	Eif1	eukaryotic translation initiation factor 1	ENSMUSG00000035530	3995.23	-0.0684941	0.0342967	-1.9971	0.045814	0.779196
18591	Pdgfb	platelet derived growth factor, B polypeptide	ENSMUSG00000000489	1185.06	0.0897314	0.0449637	1.99564	0.0459728	0.779196
98910	Usp6nl	USP6 N-terminal like	ENSMUSG00000039046	533.633	0.0989244	0.0498172	1.98575	0.0470614	0.782288
71703	Armcx3	armadillo repeat containing, X-linked 3	ENSMUSG00000049047	2202.18	-0.0774402	0.038892	-1.99116	0.0464633	0.782288
22784	Slc30a3	solute carrier family 30 (zinc transporter), member 3	ENSMUSG00000029151	1896.54	-0.0855789	0.0429571	-1.9922	0.0463496	0.782288
18641	Pfkl	phosphofructokinase, liver, B-type	ENSMUSG00000020277	8787.51	-0.0738258	0.037086	-1.99067	0.0465177	0.782288
104303	Arl1	ADP-ribosylation factor-like 1	ENSMUSG00000060904	2831.55	-0.074394	0.0374456	-1.98672	0.0469534	0.782288
17159	Man2b1	mannosidase 2, alpha B1	ENSMUSG00000005142	712.927	-0.0574624	0.0289273	-1.98645	0.0469838	0.782288
50769	Atp8a2	ATPase, aminophospholipid transporter-like, class I, type 8A, member 2	ENSMUSG00000021983	2506.06	0.0837173	0.0421215	1.98752	0.0468647	0.782288
108168164	LOC108168164	uncharacterized LOC108168164	ENSMUSG00000021983	2506.06	0.0837173	0.0421215	1.98752	0.0468647	0.782288
53817	Ddx39b	DEAD (Asp-Glu-Ala-Asp) box polypeptide 39B	ENSMUSG00000019432	2692.9	-0.072639	0.0365641	-1.98662	0.0469644	0.782288
19211	Pten	phosphatase and tensin homolog	ENSMUSG00000013663	4963.03	-0.0709882	0.0356796	-1.9896	0.046635	0.782288
18767	Pkia	protein kinase inhibitor, alpha	ENSMUSG00000027499	4404.92	-0.0719044	0.0363568	-1.97774	0.0479579	0.78837
69807	Trim32	tripartite motif-containing 32	ENSMUSG00000051675	8418.75	-0.0592807	0.0299802	-1.97733	0.0480044	0.78837
28015	Polr2m	polymerase (RNA) II (DNA directed) polypeptide M	ENSMUSG00000032199	2559.85	0.0774749	0.0391592	1.97846	0.047877	0.78837
94230	Cpsf1	cleavage and polyadenylation specific factor 1	ENSMUSG00000034022	1245.96	-0.0898164	0.0453338	-1.98122	0.0475664	0.78837
21411	Tcf20	transcription factor 20	ENSMUSG00000041852	3278.08	0.0730185	0.0368903	1.97934	0.0477777	0.78837
224454	Zdhhc14	zinc finger, DHHC domain containing 14	ENSMUSG00000034265	1353.54	-0.0894574	0.0452345	-1.97764	0.0479699	0.78837
269615	Plch2	phospholipase C, eta 2	ENSMUSG00000029055	5368.39	-0.0761337	0.0385621	-1.97431	0.0483462	0.792393
26412	Map4k2	mitogen-activated protein kinase kinase kinase kinase 2	ENSMUSG00000024948	627.484	0.0971536	0.049296	1.97082	0.0487444	0.797326
218811	Sec24c	Sec24 related gene family, member C (S. cerevisiae)	ENSMUSG00000039367	2866.39	-0.0725225	0.0368198	-1.96966	0.0488773	0.797908
19894	Rph3a	rabphilin 3A	ENSMUSG00000029608	14004	0.0634721	0.0322897	1.96571	0.0493322	0.802137
54003	Nell2	NEL-like 2	ENSMUSG00000022454	41928.3	-0.0593015	0.030167	-1.96577	0.0493247	0.802137
68525	Evc2	EvC ciliary complex subunit 2	ENSMUSG00000050248	702.446	-0.0951407	0.0486013	-1.95758	0.0502796	0.815893
72902	Spock3	sparc/osteonectin, cwcv and kazal-like domains proteoglycan 3	ENSMUSG00000054162	1513.26	-0.0879427	0.0449628	-1.9559	0.0504769	0.815893
12418	Cbx4	chromobox 4	ENSMUSG00000039989	2686.32	-0.0752236	0.0384531	-1.95624	0.0504366	0.815893
70239	Gtf3c5	general transcription factor IIIC, polypeptide 5	ENSMUSG00000026816	390.493	-0.0986419	0.0505577	-1.95107	0.0510481	0.819058
15476	Hs3st1	heparan sulfate (glucosamine) 3-O-sulfotransferase 1	ENSMUSG00000051022	371.004	0.0986428	0.0505395	1.9518	0.0509623	0.819058
84113	Ptov1	prostate tumor over expressed gene 1	ENSMUSG00000038502	3348.74	-0.0697123	0.0357886	-1.94789	0.0514279	0.819058
223272	Itgbl1	integrin, beta-like 1	ENSMUSG00000032925	413.991	-0.0981811	0.0503555	-1.94976	0.0512049	0.819058
244895	Peak1	pseudopodium-enriched atypical kinase 1	ENSMUSG00000074305	2785.43	0.079988	0.0410367	1.94918	0.0512735	0.819058
328234	Rnf182	ring finger protein 182	ENSMUSG00000044164	1481.51	-0.086059	0.0441415	-1.94962	0.0512218	0.819058
13196	Asap1	ArfGAP with SH3 domain, ankyrin repeat and PH domain1	ENSMUSG00000022377	4016.19	0.0707364	0.0363212	1.94752	0.0514722	0.819058
23994	Dazap2	DAZ associated protein 2	ENSMUSG00000000346	1267.2	-0.0862727	0.0442746	-1.94858	0.0513454	0.819058
15510	Hspd1	heat shock protein 1 (chaperonin)	ENSMUSG00000025980	5578.54	0.0605105	0.0312641	1.93546	0.0529335	0.819506
13838	Epha4	Eph receptor A4	ENSMUSG00000026235	20460.3	-0.0590477	0.0304069	-1.94192	0.0521473	0.819506
227541	Camk1d	calcium/calmodulin-dependent protein kinase ID	ENSMUSG00000039145	10734.6	-0.0563046	0.0289792	-1.94293	0.0520247	0.819506
241556	Tspan18	tetraspanin 18	ENSMUSG00000027217	1107.89	-0.0927347	0.047927	-1.93492	0.0530004	0.819506
269336	Ccdc32	coiled-coil domain containing 32	ENSMUSG00000039983	1860.42	0.0803103	0.0413166	1.94378	0.0519221	0.819506
17979	Ncoa3	nuclear receptor coactivator 3	ENSMUSG00000027678	1134.89	-0.094555	0.0487645	-1.93901	0.0524996	0.819506
230861	Eif4g3	eukaryotic translation initiation factor 4 gamma, 3	ENSMUSG00000028760	12362.2	0.0566857	0.0292264	1.93954	0.0524358	0.819506
16826	Ldb2	LIM domain binding 2	ENSMUSG00000039706	2044.9	0.0841306	0.0432581	1.94485	0.0517931	0.819506
17319	Mif	macrophage migration inhibitory factor (glycosylation-inhibiting factor)	ENSMUSG00000033307	2355.29	-0.0745906	0.0383389	-1.94556	0.051708	0.819506
103098	Slc6a15	solute carrier family 6 (neurotransmitter transporter), member 15	ENSMUSG00000019894	2717.32	0.0749954	0.0386437	1.94069	0.0522958	0.819506
14559	Gdf1	growth differentiation factor 1	ENSMUSG00000087408	2256.47	-0.0968003	0.0499493	-1.93797	0.0526269	0.819506
93898	Cers1	ceramide synthase 1	ENSMUSG00000087408	2256.47	-0.0968003	0.0499493	-1.93797	0.0526269	0.819506
235320	Zbtb16	zinc finger and BTB domain containing 16	ENSMUSG00000066687	1992.87	0.0885191	0.0456719	1.93815	0.0526047	0.819506
103677	Smg6	Smg-6 homolog, nonsense mediated mRNA decay factor (C. elegans)	ENSMUSG00000038290	875.314	-0.0939294	0.0483317	-1.94343	0.051964	0.819506
76980	Ube2ql1	ubiquitin-conjugating enzyme E2Q family-like 1	ENSMUSG00000052981	8598.73	0.054724	0.0282765	1.93532	0.0529514	0.819506
240614	Ranbp6	RAN binding protein 6	ENSMUSG00000074909	1247.25	-0.0852087	0.0440276	-1.93535	0.0529474	0.819506
223666	Arhgap39	Rho GTPase activating protein 39	ENSMUSG00000033697	4840.42	-0.076264	0.0394416	-1.93359	0.0531635	0.820479
16329	Inpp1	inositol polyphosphate-1-phosphatase	ENSMUSG00000026102	1087.5	-0.0875057	0.0453894	-1.92789	0.053869	0.822003
19275	Ptprn	protein tyrosine phosphatase, receptor type, N	ENSMUSG00000026204	20146.6	-0.0584671	0.0304273	-1.92153	0.0546647	0.822003
66967	Edem3	ER degradation enhancer, mannosidase alpha-like 3	ENSMUSG00000043019	1802.55	-0.0768056	0.0400806	-1.91628	0.0553294	0.822003
13205	Ddx3x	DEAD/H (Asp-Glu-Ala-Asp/His) box polypeptide 3, X-linked	ENSMUSG00000000787	7988.39	-0.0576633	0.0301773	-1.91082	0.056028	0.822003
56692	Lamtor3	late endosomal/lysosomal adaptor, MAPK and MTOR activator 3	ENSMUSG00000091512	704.118	-0.094756	0.0491512	-1.92785	0.0538739	0.822003
77032	Tstd3	thiosulfate sulfurtransferase (rhodanese)-like domain containing 3	ENSMUSG00000028251	420.692	0.0970055	0.0504757	1.92183	0.0546276	0.822003
230514	Leprot	leptin receptor overlapping transcript	ENSMUSG00000035212	416.957	-0.0968204	0.0505464	-1.91548	0.0554319	0.822003
242960	Fbxl5	F-box and leucine-rich repeat protein 5	ENSMUSG00000039753	1949.89	-0.0793143	0.0410896	-1.93028	0.0535727	0.822003
NA	NA	NA	ENSMUSG00000072769	1835.99	0.0779497	0.040541	1.92274	0.0545132	0.822003
54201	Zfp316	zinc finger protein 316	ENSMUSG00000046658	832.659	-0.0912228	0.0474072	-1.92424	0.0543245	0.822003
245880	Wasf3	WAS protein family, member 3	ENSMUSG00000029636	3150.9	0.0685702	0.0359016	1.90995	0.0561399	0.822003
13191	Dctn1	dynactin 1	ENSMUSG00000031865	16211.7	-0.0502603	0.0262892	-1.91182	0.0558987	0.822003
233824	Cog7	component of oligomeric golgi complex 7	ENSMUSG00000034951	1456.02	-0.0848041	0.0442481	-1.91656	0.0552938	0.822003
76484	Kndc1	kinase non-catalytic C-lobe domain (KIND) containing 1	ENSMUSG00000066129	3203.09	-0.0703412	0.0366206	-1.92081	0.0547559	0.822003
73420	Ccsap	centriole, cilia and spindle associated protein	ENSMUSG00000031971	2111.93	-0.0822984	0.0426093	-1.93146	0.0534256	0.822003
72003	Synpr	synaptoporin	ENSMUSG00000056296	2354.62	-0.082021	0.0428908	-1.91232	0.0558345	0.822003
14702	Gng2	guanine nucleotide binding protein (G protein), gamma 2	ENSMUSG00000043004	10919.1	0.060127	0.0312608	1.9234	0.0544303	0.822003
237761	Sowaha	sosondowah ankyrin repeat domain family member A	ENSMUSG00000044352	4356.98	-0.0723036	0.0375798	-1.924	0.054354	0.822003
23989	Med24	mediator complex subunit 24	ENSMUSG00000017210	3397.02	-0.0675365	0.0352537	-1.91573	0.0553996	0.822003
16647	Kpna2	karyopherin (importin) alpha 2	ENSMUSG00000018362	719.957	0.0929423	0.0486683	1.90971	0.056171	0.822003
217310	Hid1	HID1 domain containing	ENSMUSG00000034586	3729.03	-0.0709459	0.0370887	-1.91287	0.0557643	0.822003
15081	H3f3b	H3 histone, family 3B	ENSMUSG00000016559	3244.47	-0.0707921	0.0367416	-1.92676	0.05401	0.822003
625328	H3f3c	H3 histone, family 3C	ENSMUSG00000016559	3244.47	-0.0707921	0.0367416	-1.92676	0.05401	0.822003
667250	Gm12657	predicted gene 12657	ENSMUSG00000016559	3244.47	-0.0707921	0.0367416	-1.92676	0.05401	0.822003
11992	Auh	AU RNA binding protein/enoyl-coenzyme A hydratase	ENSMUSG00000021460	1199.85	-0.0881072	0.0460019	-1.91529	0.055455	0.822003
70435	Inf2	inverted formin, FH2 and WH2 domain containing	ENSMUSG00000037679	4531.93	-0.095694	0.0500524	-1.91188	0.055892	0.822003
64706	Scube1	signal peptide, CUB domain, EGF-like 1	ENSMUSG00000016763	1047.78	-0.0897004	0.0469557	-1.91032	0.056092	0.822003
17968	Ncam2	neural cell adhesion molecule 2	ENSMUSG00000022762	2370.29	0.07336	0.0380889	1.92602	0.0541022	0.822003
20541	Slc8a1	solute carrier family 8 (sodium/calcium exchanger), member 1	ENSMUSG00000054640	1798.21	-0.0811309	0.0422505	-1.92024	0.0548281	0.822003
574402	Gpr17	G protein-coupled receptor 17	ENSMUSG00000052229	343.659	0.0949939	0.049592	1.91551	0.0554275	0.822003
67393	Cxxc5	CXXC finger 5	ENSMUSG00000046668	2090.3	-0.0752036	0.0390815	-1.92428	0.0543198	0.822003
50935	St6galnac6	ST6 (alpha-N-acetyl-neuraminyl-2,3-beta-galactosyl-1,3)-N-acetylgalactosaminide alpha-2,6-sialyltransferase 6	ENSMUSG00000026811	1553.61	0.0795773	0.0418374	1.90206	0.0571631	0.826142
72404	Wdr44	WD repeat domain 44	ENSMUSG00000036769	641.514	-0.0930146	0.0488079	-1.90573	0.0566853	0.826142
16490	Kcna2	potassium voltage-gated channel, shaker-related subfamily, member 2	ENSMUSG00000040724	5770.05	0.0696531	0.036649	1.90055	0.0573612	0.826142
13858	Eps15	epidermal growth factor receptor pathway substrate 15	ENSMUSG00000028552	7870.41	0.0607749	0.0319237	1.90375	0.0569425	0.826142
330401	Tmcc1	transmembrane and coiled coil domains 1	ENSMUSG00000030126	2307.6	0.072104	0.037922	1.90138	0.0572527	0.826142
216760	Mfap3	microfibrillar-associated protein 3	ENSMUSG00000020522	652.679	-0.0951043	0.0500378	-1.90065	0.0573479	0.826142
68149	Otub2	OTU domain, ubiquitin aldehyde binding 2	ENSMUSG00000021203	1442.33	-0.0813393	0.0427846	-1.90113	0.0572844	0.826142
93711	Pcdhga3	protocadherin gamma subfamily A, 3	ENSMUSG00000104346	716.273	-0.0956908	0.0502745	-1.90336	0.0569929	0.826142
226098	Hectd2	HECT domain E3 ubiquitin protein ligase 2	ENSMUSG00000041180	979.84	-0.0915574	0.0480491	-1.9055	0.0567154	0.826142
246198	Mllt6	myeloid/lymphoid or mixed-lineage leukemia; translocated to, 6	ENSMUSG00000038437	1828.91	0.079575	0.041902	1.89907	0.0575547	0.827475
319478	Cxxc4	CXXC finger 4	ENSMUSG00000044365	553.07	0.0958931	0.0505578	1.8967	0.057867	0.829057
20621	Snn	stannin	ENSMUSG00000037972	5737.99	0.0580093	0.0305791	1.89703	0.0578243	0.829057
14104	Fasn	fatty acid synthase	ENSMUSG00000025153	13234.3	-0.0617362	0.0325994	-1.89378	0.0582539	0.83255
319924	Apba1	amyloid beta (A4) precursor protein binding, family A, member 1	ENSMUSG00000024897	9564.34	0.0704251	0.0371964	1.89333	0.0583141	0.83255
74309	Osbp2	oxysterol binding protein 2	ENSMUSG00000020435	3960.41	-0.0699706	0.0369744	-1.89241	0.0584367	0.832851
27062	Cadps	Ca2+-dependent secretion activator	ENSMUSG00000054423	10461.1	-0.0583269	0.0308573	-1.89021	0.0587293	0.835567
66673	Sorcs3	sortilin-related VPS10 domain containing receptor 3	ENSMUSG00000063434	2322.94	-0.0808156	0.0427798	-1.8891	0.0588779	0.836229
99480	Dnttip2	deoxynucleotidyltransferase, terminal, interacting protein 2	ENSMUSG00000039756	322.575	0.0930777	0.049306	1.88776	0.0590588	0.836297
212168	Zswim4	zinc finger SWIM-type containing 4	ENSMUSG00000035671	622.287	-0.093941	0.0497688	-1.88755	0.0590868	0.836297
320707	Atp2b3	ATPase, Ca++ transporting, plasma membrane 3	ENSMUSG00000031376	5930.76	-0.0649732	0.0344675	-1.88506	0.059422	0.836707
234847	Spg7	SPG7, paraplegin matrix AAA peptidase subunit	ENSMUSG00000000738	1409.93	0.081792	0.0433771	1.8856	0.0593488	0.836707
70530	Lrfn2	leucine rich repeat and fibronectin type III domain containing 2	ENSMUSG00000040490	1332.77	-0.081665	0.0432942	-1.88628	0.0592571	0.836707
68404	Nrn1	neuritin 1	ENSMUSG00000039114	5394.97	-0.0740773	0.0393348	-1.88325	0.0596663	0.837269
106585	Ankrd12	ankyrin repeat domain 12	ENSMUSG00000034647	633.829	0.093742	0.0497704	1.88349	0.059634	0.837269
98741	Kcnb2	potassium voltage gated channel, Shab-related subfamily, member 2	ENSMUSG00000092083	769.589	0.0888944	0.0477953	1.8599	0.0629001	0.844376
110895	Slc9a4	solute carrier family 9 (sodium/hydrogen exchanger), member 4	ENSMUSG00000026065	614.274	-0.0929037	0.0497722	-1.86658	0.0619604	0.844376
74159	Acbd5	acyl-Coenzyme A binding domain containing 5	ENSMUSG00000026781	1891.49	0.0776341	0.0413449	1.87772	0.0604194	0.844376
171171	Ntng2	netrin G2	ENSMUSG00000035513	1457.53	-0.0814786	0.0437111	-1.86402	0.0623182	0.844376
227731	Slc25a25	solute carrier family 25 (mitochondrial carrier, phosphate carrier), member 25	ENSMUSG00000026819	1705.12	-0.0769099	0.0413765	-1.85878	0.0630577	0.844376
66632	Dph6	diphthamine biosynthesis 6	ENSMUSG00000057147	598.74	-0.0938217	0.0502014	-1.86891	0.0616358	0.844376
13821	Epb41l1	erythrocyte membrane protein band 4.1 like 1	ENSMUSG00000027624	16470.5	0.0505246	0.0270038	1.87102	0.0613422	0.844376
228880	Zmynd8	zinc finger, MYND-type containing 8	ENSMUSG00000039671	3777.63	-0.0687491	0.0368612	-1.86508	0.06217	0.844376
72043	Sulf2	sulfatase 2	ENSMUSG00000006800	8736.85	-0.0652728	0.034844	-1.87329	0.0610289	0.844376
67615	Ube2r2	ubiquitin-conjugating enzyme E2R 2	ENSMUSG00000036241	1831.84	0.0749635	0.0402742	1.86133	0.0626975	0.844376
20481	Ski	ski sarcoma viral oncogene homolog (avian)	ENSMUSG00000029050	5229.57	-0.0616911	0.0328749	-1.87654	0.0605806	0.844376
67568	Mrfap1	Morf4 family associated protein 1	ENSMUSG00000055302	6450.6	-0.0659669	0.0353712	-1.86499	0.0621827	0.844376
214292	Syna	syncytin a	ENSMUSG00000085957	523.779	-0.095006	0.0505923	-1.87788	0.0603982	0.844376
50794	Klf13	Kruppel-like factor 13	ENSMUSG00000052040	7456.55	-0.0562984	0.0302576	-1.86064	0.0627952	0.844376
73822	Mfsd12	major facilitator superfamily domain containing 12	ENSMUSG00000034854	1762.24	-0.0759589	0.0405058	-1.87526	0.0607568	0.844376
382056	Crtc1	CREB regulated transcription coactivator 1	ENSMUSG00000003575	8383.99	-0.0621999	0.0332954	-1.86812	0.0617449	0.844376
27057	Ncoa4	nuclear receptor coactivator 4	ENSMUSG00000056234	1005.2	-0.0733367	0.0392002	-1.87082	0.0613695	0.844376
74551	Pck2	phosphoenolpyruvate carboxykinase 2 (mitochondrial)	ENSMUSG00000040618	694.323	-0.0919839	0.0493842	-1.86262	0.0625163	0.844376
110265	Msra	methionine sulfoxide reductase A	ENSMUSG00000054733	1005.33	0.0854262	0.0458579	1.86284	0.0624842	0.844376
74020	Cpne4	copine IV	ENSMUSG00000032564	6264.06	-0.0626945	0.033657	-1.86275	0.0624976	0.844376
108068	Grm2	glutamate receptor, metabotropic 2	ENSMUSG00000023192	2057.14	-0.0815095	0.0434989	-1.87383	0.0609538	0.844376
170625	Snx18	sorting nexin 18	ENSMUSG00000042364	459.488	-0.0942527	0.0505335	-1.86515	0.0621599	0.844376
71175	Nipbl	NIPBL cohesin loading factor	ENSMUSG00000022141	492.97	0.0939382	0.0505363	1.85883	0.0630516	0.844376
66251	Arfgap3	ADP-ribosylation factor GTPase activating protein 3	ENSMUSG00000054277	497.257	0.0944888	0.0504391	1.87332	0.0610236	0.844376
332175	Zdhhc23	zinc finger, DHHC domain containing 23	ENSMUSG00000036304	3136.44	0.0706696	0.0380138	1.85905	0.0630198	0.844376
13664	Eif1a	eukaryotic translation initiation factor 1A	ENSMUSG00000057561	1146.8	0.0824799	0.0443174	1.86112	0.0627279	0.844376
18563	Pcx	pyruvate carboxylase	ENSMUSG00000024892	1440.96	0.0811863	0.0435132	1.86578	0.0620716	0.844376
107094	Rrp12	ribosomal RNA processing 12 homolog (S. cerevisiae)	ENSMUSG00000035049	1093.74	-0.0884639	0.0473185	-1.86954	0.0615474	0.844376
212427	A730008H23Rik	RIKEN cDNA A730008H23 gene	ENSMUSG00000044783	474.337	0.0914855	0.0494715	1.84926	0.0644208	0.844686
381280	Hjurp	Holliday junction recognition protein	ENSMUSG00000044783	474.337	0.0914855	0.0494715	1.84926	0.0644208	0.844686
72323	Asb6	ankyrin repeat and SOCS box-containing 6	ENSMUSG00000039483	792.562	-0.0882764	0.0476333	-1.85325	0.0638465	0.844686
18167	Npy2r	neuropeptide Y receptor Y2	ENSMUSG00000028004	2442.63	0.0753201	0.0406421	1.85325	0.0638459	0.844686
20360	Sema6c	sema domain, transmembrane domain (TM), and cytoplasmic domain, (semaphorin) 6C	ENSMUSG00000038777	1017.28	0.0875461	0.0472913	1.85121	0.0641391	0.844686
66797	Cntnap2	contactin associated protein-like 2	ENSMUSG00000039419	5752.08	0.0684032	0.0369781	1.84983	0.0643381	0.844686
232430	Crebl2	cAMP responsive element binding protein-like 2	ENSMUSG00000032652	379.672	0.0936002	0.0505704	1.85089	0.0641854	0.844686
14282	Fosb	FBJ osteosarcoma oncogene B	ENSMUSG00000003545	414.593	-0.0935836	0.0505595	-1.85096	0.0641753	0.844686
18624	Pepd	peptidase D	ENSMUSG00000063931	811.721	-0.0876928	0.0473042	-1.85381	0.0637668	0.844686
117150	Pip4k2c	phosphatidylinositol-5-phosphate 4-kinase, type II, gamma	ENSMUSG00000025417	4743.28	-0.0744715	0.0401673	-1.85403	0.0637342	0.844686
14661	Glud1	glutamate dehydrogenase 1	ENSMUSG00000021794	2442.99	0.0701372	0.0378419	1.85343	0.0638212	0.844686
216831	Arhgap44	Rho GTPase activating protein 44	ENSMUSG00000033389	5345.88	0.0646884	0.0349144	1.85277	0.0639154	0.844686
237943	Gpatch8	G patch domain containing 8	ENSMUSG00000034621	1323.56	0.0820769	0.0443726	1.84972	0.0643539	0.844686
14009	Etv1	ets variant 1	ENSMUSG00000004151	5738.1	0.0631383	0.0341137	1.85082	0.0641957	0.844686
241263	Gpr158	G protein-coupled receptor 158	ENSMUSG00000045967	6543.25	-0.0573982	0.0311339	-1.84359	0.0652428	0.845613
20779	Src	Rous sarcoma oncogene	ENSMUSG00000027646	3830.85	-0.0722495	0.0392154	-1.84238	0.0654202	0.845613
22401	Zmat3	zinc finger matrin type 3	ENSMUSG00000027663	3804.81	0.0649023	0.0351496	1.84646	0.0648256	0.845613
11769	Ap1s1	adaptor protein complex AP-1, sigma 1	ENSMUSG00000004849	3612.72	-0.0694585	0.0376585	-1.84443	0.0651202	0.845613
232976	Zfp574	zinc finger protein 574	ENSMUSG00000045252	829.845	-0.0871192	0.0472713	-1.84296	0.0653346	0.845613
20979	Syt1	synaptotagmin I	ENSMUSG00000035864	55905.4	0.044549	0.0241243	1.84664	0.0647987	0.845613
270156	AU019823	expressed sequence AU019823	ENSMUSG00000059820	397.64	0.0933942	0.0505988	1.84578	0.0649245	0.845613
94066	Mrpl36	mitochondrial ribosomal protein L36	ENSMUSG00000021607	390.111	-0.0931868	0.050551	-1.84342	0.0652674	0.845613
238266	Syt16	synaptotagmin XVI	ENSMUSG00000044912	2589.95	0.0698043	0.0378636	1.84358	0.065245	0.845613
212996	Wbscr17	Williams-Beuren syndrome chromosome region 17 homolog (human)	ENSMUSG00000034040	7200.95	-0.0584143	0.0317669	-1.83884	0.0659385	0.848298
70208	Med23	mediator complex subunit 23	ENSMUSG00000019984	690.019	-0.089477	0.0486539	-1.83905	0.0659076	0.848298
330790	Hapln4	hyaluronan and proteoglycan link protein 4	ENSMUSG00000007594	2527.46	0.0510617	0.0277583	1.83951	0.0658402	0.848298
14400	Gabrb1	gamma-aminobutyric acid (GABA) A receptor, subunit beta 1	ENSMUSG00000029212	6331.02	0.0691213	0.0376758	1.83464	0.0665597	0.854948
12764	Cmas	cytidine monophospho-N-acetylneuraminic acid synthetase	ENSMUSG00000030282	2681.18	0.0685513	0.037457	1.83013	0.0672302	0.861209
94246	Arid4b	AT rich interactive domain 4B (RBP1-like)	ENSMUSG00000039219	1098.43	-0.086359	0.047192	-1.82995	0.0672573	0.861209
29871	Scmh1	sex comb on midleg homolog 1	ENSMUSG00000000085	1647.01	0.0759161	0.0415205	1.8284	0.0674898	0.861494
67516	Kctd4	potassium channel tetramerisation domain containing 4	ENSMUSG00000046523	1875.35	-0.0749631	0.0409891	-1.82885	0.0674214	0.861494
104069	Sncb	synuclein, beta	ENSMUSG00000034891	11713.1	0.0626404	0.0342779	1.82743	0.0676354	0.862009
56846	Necab3	N-terminal EF-hand calcium binding protein 3	ENSMUSG00000027489	534.595	0.0918033	0.0503126	1.82466	0.0680529	0.86286
16497	Kcnab1	potassium voltage-gated channel, shaker-related subfamily, beta member 1	ENSMUSG00000027827	3586.9	0.0647019	0.0354688	1.82419	0.0681233	0.86286
52830	Pnrc2	proline-rich nuclear receptor coactivator 2	ENSMUSG00000028675	473.121	-0.0917141	0.0502536	-1.82502	0.0679973	0.86286
14365	Fzd3	frizzled class receptor 3	ENSMUSG00000007989	2382.89	0.0750728	0.0411368	1.82496	0.0680076	0.86286
16524	Kcnj9	potassium inwardly-rectifying channel, subfamily J, member 9	ENSMUSG00000038026	2675.09	0.0764275	0.0419395	1.82233	0.0684055	0.863021
72572	Spats2	spermatogenesis associated, serine-rich 2	ENSMUSG00000051934	1066.01	-0.0829348	0.0455159	-1.82211	0.0684387	0.863021
16594	Klc2	kinesin light chain 2	ENSMUSG00000024862	9876.07	0.0582164	0.0319516	1.82202	0.0684519	0.863021
214230	Pak6	p21 protein (Cdc42/Rac)-activated kinase 6	ENSMUSG00000074923	3337.99	-0.0755038	0.0414976	-1.81948	0.0688387	0.865552
22688	Zfp26	zinc finger protein 26	ENSMUSG00000063108	480.064	-0.0911146	0.0500819	-1.81931	0.0688639	0.865552
71538	Fbxo9	f-box protein 9	ENSMUSG00000001366	2177.78	0.0708224	0.0389568	1.81797	0.0690684	0.866793
12017	Bag1	BCL2-associated athanogene 1	ENSMUSG00000028416	1316.76	0.0843357	0.0464869	1.81418	0.0696498	0.87142
93706	Pcdhgc3	protocadherin gamma subfamily C, 3	ENSMUSG00000102918	804.601	-0.0867774	0.0478287	-1.81434	0.0696261	0.87142
68272	Rbm28	RNA binding motif protein 28	ENSMUSG00000029701	819.677	-0.0893209	0.0493011	-1.81174	0.0700259	0.871816
54161	Copg1	coatomer protein complex, subunit gamma 1	ENSMUSG00000030058	8603.21	-0.0534855	0.0294981	-1.81319	0.0698032	0.871816
79555	BC005537	cDNA sequence BC005537	ENSMUSG00000019132	4491.21	0.0625033	0.0345124	1.81104	0.0701344	0.871816
223693	Tmem184b	transmembrane protein 184b	ENSMUSG00000009035	1609.2	-0.0779394	0.043035	-1.81107	0.0701299	0.871816
225908	Myrf	myelin regulatory factor	ENSMUSG00000036098	400.436	-0.0916099	0.0505984	-1.81053	0.0702134	0.871816
240756	Klhl12	kelch-like 12	ENSMUSG00000026455	1470.81	-0.0799974	0.0444821	-1.79842	0.0721106	0.873015
320267	Fubp3	far upstream element (FUSE) binding protein 3	ENSMUSG00000026843	459.655	-0.0908073	0.0503032	-1.8052	0.0710436	0.873015
NA	NA	NA	ENSMUSG00000104597	4052.94	0.0786692	0.0435196	1.80767	0.0706572	0.873015
16765	Stmn1	stathmin 1	ENSMUSG00000028832	5181.12	0.0757787	0.0420066	1.80397	0.0712358	0.873015
19046	Ppp1cb	protein phosphatase 1, catalytic subunit, beta isoform	ENSMUSG00000014956	7375.88	-0.0603171	0.033471	-1.80207	0.071534	0.873015
19240	Tmsb10	thymosin, beta 10	ENSMUSG00000079523	2769.35	0.0762729	0.0421829	1.80815	0.0705839	0.873015
58911	Sumf1	sulfatase modifying factor 1	ENSMUSG00000030101	446.144	0.0907869	0.0503569	1.80287	0.0714087	0.873015
67412	Soga3	SOGA family member 3	ENSMUSG00000038916	2466.81	-0.0734092	0.0407847	-1.79992	0.071873	0.873015
100038725	Cep85l	centrosomal protein 85-like	ENSMUSG00000038594	442.646	-0.0907904	0.0505027	-1.79773	0.0722196	0.873015
244484	Wdr17	WD repeat domain 17	ENSMUSG00000039375	716.411	0.0863046	0.047972	1.79906	0.072009	0.873015
19270	Ptprg	protein tyrosine phosphatase, receptor type, G	ENSMUSG00000021745	4686.33	-0.0706605	0.0393358	-1.79634	0.0724405	0.873015
70601	Ecd	ecdysoneless cell cycle regulator	ENSMUSG00000021810	1198.36	-0.0787849	0.043836	-1.79726	0.0722936	0.873015
629059	Fam124a	family with sequence similarity 124, member A	ENSMUSG00000035184	531.539	0.0909835	0.050544	1.80008	0.0718473	0.873015
14586	Gfra2	glial cell line derived neurotrophic factor family receptor alpha 2	ENSMUSG00000022103	769.898	0.0891149	0.0493902	1.8043	0.0711841	0.873015
59095	Fxyd6	FXYD domain-containing ion transport regulator 6	ENSMUSG00000066705	2807.4	0.0818662	0.0454339	1.80187	0.0715653	0.873015
216766	Gemin5	gem nuclear organelle associated protein 5	ENSMUSG00000037275	846.4	-0.08798	0.0488648	-1.80048	0.071785	0.873015
245269	Nim1k	NIM1 serine/threonine protein kinase	ENSMUSG00000095930	369.179	0.0911619	0.0505694	1.80271	0.071434	0.873015
223664	Lrrc14	leucine rich repeat containing 14	ENSMUSG00000033728	567.255	-0.0901012	0.0501443	-1.79684	0.0723615	0.873015
76936	Hnrnpm	heterogeneous nuclear ribonucleoprotein M	ENSMUSG00000059208	2543.58	-0.0762858	0.042454	-1.7969	0.072351	0.873015
171180	Syt12	synaptotagmin XII	ENSMUSG00000049303	1627.04	-0.0794627	0.04393	-1.80885	0.0704742	0.873015
98402	Sh3bp4	SH3-domain binding protein 4	ENSMUSG00000036206	1357.27	0.0810661	0.0451584	1.79515	0.0726299	0.873691
26356	Ing1	inhibitor of growth family, member 1	ENSMUSG00000045969	448.335	0.0904256	0.0503907	1.79449	0.072735	0.873691
234407	Colgalt1	collagen beta(1-O)galactosyltransferase 1	ENSMUSG00000034807	1324.81	-0.0859584	0.0479149	-1.79398	0.0728165	0.873691
83674	Cnnm1	cyclin M1	ENSMUSG00000025189	2799.92	0.0714047	0.0398395	1.79231	0.0730832	0.87561
99152	Anapc2	anaphase promoting complex subunit 2	ENSMUSG00000026965	1885.66	-0.0720784	0.0402418	-1.79113	0.0732724	0.876595
234373	Sugp2	SURP and G patch domain containing 2	ENSMUSG00000036054	3258.08	-0.0675906	0.037804	-1.78792	0.0737883	0.878917
65257	Asb3	ankyrin repeat and SOCS box-containing 3	ENSMUSG00000020305	367.059	-0.0899703	0.0503026	-1.78858	0.0736823	0.878917
225288	Fhod3	formin homology 2 domain containing 3	ENSMUSG00000034295	598.188	0.0887493	0.049627	1.78833	0.0737235	0.878917
230162	Zfp189	zinc finger protein 189	ENSMUSG00000039634	719.294	-0.086617	0.0485157	-1.78534	0.0742061	0.880635
52915	Zmiz2	zinc finger, MIZ-type containing 2	ENSMUSG00000041164	8843.7	0.0528232	0.029587	1.78535	0.0742039	0.880635
60441	Mrpl38	mitochondrial ribosomal protein L38	ENSMUSG00000020775	964.14	-0.0843494	0.0472535	-1.78504	0.0742549	0.880635
245537	Nlgn3	neuroligin 3	ENSMUSG00000031302	2550.36	0.0749755	0.0420443	1.78325	0.0745454	0.881685
23805	Apc2	adenomatosis polyposis coli 2	ENSMUSG00000020135	4937.91	-0.061233	0.0343567	-1.78227	0.0747048	0.881685
223649	Nrbp2	nuclear receptor binding protein 2	ENSMUSG00000075590	2192.9	0.0752423	0.0422271	1.78185	0.0747738	0.881685
52864	Slx4	SLX4 structure-specific endonuclease subunit homolog (S. cerevisiae)	ENSMUSG00000039738	963.423	-0.0823289	0.0461723	-1.78308	0.0745737	0.881685
74081	Cep350	centrosomal protein 350	ENSMUSG00000033671	813.687	0.0875869	0.0492718	1.77763	0.075465	0.883479
19699	Reln	reelin	ENSMUSG00000042453	508.267	0.0438135	0.0246144	1.77999	0.0750774	0.883479
67661	Ift172	intraflagellar transport 172	ENSMUSG00000038564	1101.23	-0.0842114	0.0473493	-1.77851	0.0753197	0.883479
330119	Adamts3	a disintegrin-like and metallopeptidase (reprolysin type) with thrombospondin type 1 motif, 3	ENSMUSG00000043635	1652.36	-0.0824001	0.0463257	-1.77871	0.0752873	0.883479
19415	Rasal1	RAS protein activator like 1 (GAP1 like)	ENSMUSG00000029602	4701.25	-0.0642314	0.0361202	-1.77827	0.0753601	0.883479
78655	Eif3j1	eukaryotic translation initiation factor 3, subunit J1	ENSMUSG00000027236	664.347	-0.0591693	0.0333275	-1.77539	0.0758335	0.884947
80334	Kcnip4	Kv channel interacting protein 4	ENSMUSG00000029088	1694.89	0.0780216	0.0439402	1.77563	0.0757937	0.884947
381126	Garem1	GRB2 associated regulator of MAPK1 subtype 1	ENSMUSG00000042680	2273.36	-0.0706201	0.0397882	-1.7749	0.0759143	0.884947
20230	Satb1	special AT-rich sequence binding protein 1	ENSMUSG00000023927	2198.85	0.0783604	0.0441983	1.77293	0.0762407	0.887489
620292	Cntnap5c	contactin associated protein-like 5C	ENSMUSG00000038048	508.817	-0.0895458	0.0505273	-1.77223	0.076357	0.887582
20833	Ssrp1	structure specific recognition protein 1	ENSMUSG00000027067	2375.15	-0.0698323	0.0394633	-1.76955	0.0768017	0.891487
76561	Snx7	sorting nexin 7	ENSMUSG00000028007	537.52	0.0885494	0.050148	1.76576	0.0774358	0.896308
23877	Fiz1	Flt3 interacting zinc finger protein 1	ENSMUSG00000061374	530.747	-0.0887306	0.0502398	-1.76614	0.077372	0.896308
102857	Slc6a8	solute carrier family 6 (neurotransmitter transporter, creatine), member 8	ENSMUSG00000019558	2219.44	-0.0692034	0.0392134	-1.76479	0.0775995	0.896937
12653	Chgb	chromogranin B	ENSMUSG00000027350	38432.3	-0.0821592	0.0466823	-1.75997	0.0784135	0.899626
20614	Snap25	synaptosomal-associated protein 25	ENSMUSG00000027273	80102.5	0.0529625	0.030093	1.75996	0.0784143	0.899626
11553	Adra2c	adrenergic receptor, alpha 2c	ENSMUSG00000045318	503.378	-0.0890304	0.0505995	-1.75951	0.0784908	0.899626
15258	Hipk2	homeodomain interacting protein kinase 2	ENSMUSG00000061436	354.92	0.0890694	0.0505979	1.76034	0.0783505	0.899626
66612	Ormdl3	ORM1-like 3 (S. cerevisiae)	ENSMUSG00000038150	1267.12	-0.0777552	0.0441754	-1.76015	0.0783828	0.899626
170936	Zfp369	zinc finger protein 369	ENSMUSG00000021514	745.746	0.0870667	0.0494638	1.76021	0.078372	0.899626
228026	Pdk1	pyruvate dehydrogenase kinase, isoenzyme 1	ENSMUSG00000006494	1426.26	0.0763147	0.043423	1.75747	0.0788373	0.899821
24109	Ubl3	ubiquitin-like 3	ENSMUSG00000001687	2657.17	-0.0695477	0.0395689	-1.75764	0.0788096	0.899821
107272	Psat1	phosphoserine aminotransferase 1	ENSMUSG00000024640	948.849	-0.0856831	0.0487286	-1.75838	0.0786836	0.899821
330812	Rnf150	ring finger protein 150	ENSMUSG00000047747	3271.11	-0.0643442	0.0366441	-1.75592	0.0791017	0.901583
70827	Trak2	trafficking protein, kinesin binding 2	ENSMUSG00000026028	5425.46	0.0555989	0.0317749	1.74977	0.0801574	0.903242
241066	Carf	calcium response factor	ENSMUSG00000026017	495.367	-0.0867862	0.0499629	-1.73701	0.0823849	0.903242
51800	Bok	BCL2-related ovarian killer	ENSMUSG00000026278	1990.6	-0.0765087	0.0436611	-1.75233	0.0797165	0.903242
320632	Snrnp200	small nuclear ribonucleoprotein 200 (U5)	ENSMUSG00000003660	3095.23	-0.0651881	0.0374625	-1.74009	0.0818438	0.903242
66104	Tceal6	transcription elongation factor A (SII)-like 6	ENSMUSG00000031409	1115.68	0.0794774	0.0457071	1.73884	0.0820622	0.903242
170439	Elovl6	ELOVL family member 6, elongation of long chain fatty acids (yeast)	ENSMUSG00000041220	2783.81	0.0665316	0.0380998	1.74625	0.0807678	0.903242
67490	Ufl1	UFM1 specific ligase 1	ENSMUSG00000040359	625.693	-0.085987	0.0492809	-1.74483	0.0810137	0.903242
74326	Hnrnpr	heterogeneous nuclear ribonucleoprotein R	ENSMUSG00000066037	2814.14	-0.0641924	0.0367676	-1.74589	0.0808295	0.903242
19017	Ppargc1a	peroxisome proliferative activated receptor, gamma, coactivator 1 alpha	ENSMUSG00000029167	1230.18	0.0790273	0.045129	1.75114	0.0799213	0.903242
243274	Tmem132d	transmembrane protein 132D	ENSMUSG00000034310	651.64	0.0869824	0.0497265	1.74921	0.0802539	0.903242
53324	Nptx2	neuronal pentraxin 2	ENSMUSG00000059991	3217.68	-0.0735623	0.0422849	-1.73968	0.0819147	0.903242
18430	Oxtr	oxytocin receptor	ENSMUSG00000049112	555.009	-0.0879481	0.050254	-1.75007	0.0801058	0.903242
243621	Iqsec3	IQ motif and Sec7 domain 3	ENSMUSG00000040797	6186.63	-0.0591126	0.0339932	-1.73895	0.0820433	0.903242
259277	Klk8	kallikrein related-peptidase 8	ENSMUSG00000064023	425.74	-0.0881294	0.0505978	-1.74177	0.0815495	0.903242
140742	Sesn1	sestrin 1	ENSMUSG00000038332	1080.35	0.0818878	0.0471003	1.73858	0.0821081	0.903242
64451	Dip2a	disco interacting protein 2 homolog A	ENSMUSG00000020231	1468.17	0.0764907	0.0436491	1.7524	0.0797046	0.903242
70359	Gtpbp3	GTP binding protein 3	ENSMUSG00000007610	456.963	0.0876099	0.0503999	1.7383	0.0821586	0.903242
74166	Tmem38a	transmembrane protein 38A	ENSMUSG00000031791	3683.78	0.0714082	0.0410415	1.7399	0.0818761	0.903242
102060	Gadd45gip1	growth arrest and DNA-damage-inducible, gamma interacting protein 1	ENSMUSG00000033751	565.577	0.0872015	0.0501951	1.73725	0.0823429	0.903242
66714	4921524J17Rik	RIKEN cDNA 4921524J17 gene	ENSMUSG00000036934	388.594	-0.0878241	0.0505485	-1.73742	0.0823123	0.903242
109151	Chd9	chromodomain helicase DNA binding protein 9	ENSMUSG00000056608	1059.75	0.0866952	0.04984	1.73947	0.0819517	0.903242
170930	Sumo2	small ubiquitin-like modifier 2	ENSMUSG00000020738	643.527	-0.0863647	0.0492712	-1.75284	0.0796289	0.903242
238331	Zdhhc22	zinc finger, DHHC-type containing 22	ENSMUSG00000048483	376.639	0.0671894	0.0386456	1.7386	0.0821045	0.903242
72258	Kcnk10	potassium channel, subfamily K, member 10	ENSMUSG00000033854	554.636	0.0874235	0.0502694	1.7391	0.0820169	0.903242
12709	Ckb	creatine kinase, brain	ENSMUSG00000001270	17377.4	-0.0507775	0.0292314	-1.73708	0.0823723	0.903242
20442	St3gal1	ST3 beta-galactoside alpha-2,3-sialyltransferase 1	ENSMUSG00000013846	789.121	0.0874375	0.0503475	1.73668	0.0824435	0.903242
93878	Pcdhb7	protocadherin beta 7	ENSMUSG00000045062	453.363	-0.0875583	0.0502344	-1.74299	0.0813349	0.903242
17919	Myo5b	myosin VB	ENSMUSG00000025885	5420.64	-0.0871777	0.0498075	-1.75029	0.0800677	0.903242
226255	Atrnl1	attractin like 1	ENSMUSG00000054843	3959.77	-0.059108	0.0337742	-1.75009	0.0801025	0.903242
57754	Cend1	cell cycle exit and neuronal differentiation 1	ENSMUSG00000060240	10409	0.0479156	0.0276448	1.73326	0.0830498	0.906249
414085	9330151L19Rik	RIKEN cDNA 9330151L19 gene	ENSMUSG00000097061	367.183	0.0877458	0.0505973	1.7342	0.0828826	0.906249
20975	Synj2	synaptojanin 2	ENSMUSG00000023805	2890.83	-0.0654131	0.0377388	-1.73331	0.08304	0.906249
636808	Cntnap5a	contactin associated protein-like 5A	ENSMUSG00000070695	925.308	0.0821123	0.0476301	1.72396	0.0847156	0.907813
241514	Zfp804a	zinc finger protein 804A	ENSMUSG00000070866	1114.57	0.0790823	0.0458207	1.72591	0.0843641	0.907813
229709	Ahcyl1	S-adenosylhomocysteine hydrolase-like 1	ENSMUSG00000027893	6189.12	0.0555728	0.0321916	1.72631	0.0842912	0.907813
108058	Camk2d	calcium/calmodulin-dependent protein kinase II, delta	ENSMUSG00000053819	1941.03	0.0870589	0.0504278	1.72641	0.084274	0.907813
76800	Usp42	ubiquitin specific peptidase 42	ENSMUSG00000051306	507.994	-0.08638	0.0499829	-1.72819	0.0839542	0.907813
21872	Tjp1	tight junction protein 1	ENSMUSG00000030516	1306.35	-0.0759246	0.044024	-1.72462	0.084596	0.907813
11776	Ap3d1	adaptor-related protein complex 3, delta 1 subunit	ENSMUSG00000020198	5487.85	-0.056883	0.0328533	-1.73143	0.083376	0.907813
320191	Hook3	hook microtubule tethering protein 3	ENSMUSG00000037234	1453.63	0.0767223	0.044506	1.72386	0.0847324	0.907813
74100	Arpp21	cyclic AMP-regulated phosphoprotein, 21	ENSMUSG00000032503	8665.27	0.0613084	0.0355114	1.72645	0.0842672	0.907813
18015	Nf1	neurofibromin 1	ENSMUSG00000020716	2428.22	-0.0656251	0.038019	-1.72611	0.0843273	0.907813
68653	Samm50	SAMM50 sorting and assembly machinery component	ENSMUSG00000022437	2059.49	-0.0678578	0.0392672	-1.72811	0.0839694	0.907813
68614	Letmd1	LETM1 domain containing 1	ENSMUSG00000037353	1368.45	-0.073622	0.0426719	-1.72531	0.0844725	0.907813
210982	Bicral	BRD4 interacting chromatin remodeling complex associated protein like	ENSMUSG00000036568	1197.99	0.0763532	0.0442936	1.7238	0.084744	0.907813
193796	Kdm4b	lysine (K)-specific demethylase 4B	ENSMUSG00000024201	2948.06	-0.0626282	0.0362249	-1.72887	0.0838322	0.907813
104582	Rprml	reprimo-like	ENSMUSG00000046215	2229.29	-0.066822	0.0387791	-1.72315	0.0848622	0.907892
80909	Gatsl2	GATS protein-like 2	ENSMUSG00000015944	4149.23	0.0601117	0.0349174	1.72154	0.0851524	0.909739
16485	Kcna1	potassium voltage-gated channel, shaker-related subfamily, member 1	ENSMUSG00000047976	1987.95	-0.0772623	0.0448947	-1.72097	0.0852568	0.909739
78523	Mrpl9	mitochondrial ribosomal protein L9	ENSMUSG00000028140	787.452	-0.0821966	0.0477892	-1.71998	0.0854359	0.910465
11966	Atp6v1b2	ATPase, H+ transporting, lysosomal V1 subunit B2	ENSMUSG00000006273	32841.1	0.0541009	0.0314702	1.71911	0.0855938	0.910962
52064	Coq5	coenzyme Q5 methyltransferase	ENSMUSG00000041733	870.671	-0.0815985	0.0475541	-1.71591	0.0861787	0.912574
140580	Elmo1	engulfment and cell motility 1	ENSMUSG00000041112	1022.6	0.0816346	0.0475751	1.71591	0.0861785	0.912574
69675	Pxdn	peroxidasin	ENSMUSG00000020674	1467.29	-0.0810799	0.0472391	-1.71637	0.0860941	0.912574
319944	Taf2	TATA-box binding protein associated factor 2	ENSMUSG00000037343	816.736	-0.0825358	0.0481022	-1.71584	0.0861907	0.912574
11477	Acvr1	activin A receptor, type 1	ENSMUSG00000026836	1334.32	-0.0745533	0.0434792	-1.71469	0.0864019	0.913631
217371	Rab40b	Rab40B, member RAS oncogene family	ENSMUSG00000025170	947.463	-0.0808453	0.0471657	-1.71407	0.086516	0.913658
228140	Tnks1bp1	tankyrase 1 binding protein 1	ENSMUSG00000033955	3427.16	-0.061571	0.0361897	-1.70134	0.0888793	0.915605
29812	Ndrg3	N-myc downstream regulated gene 3	ENSMUSG00000027634	26825.4	0.0485331	0.0284261	1.70734	0.0877585	0.915605
67790	Rab39b	RAB39B, member RAS oncogene family	ENSMUSG00000031202	1471.78	-0.0715528	0.0420869	-1.70012	0.0891084	0.915605
260305	Nphp4	nephronophthisis 4 (juvenile) homolog (human)	ENSMUSG00000039577	505.939	-0.0849474	0.0499661	-1.7001	0.0891117	0.915605
76522	Lsm8	LSM8 homolog, U6 small nuclear RNA associated	ENSMUSG00000044155	590.785	-0.0859806	0.0502474	-1.71114	0.0870547	0.915605
67582	Slc25a26	solute carrier family 25 (mitochondrial carrier, phosphate carrier), member 26	ENSMUSG00000045100	326.648	-0.0854054	0.0499932	-1.70834	0.087573	0.915605
108073	Grm7	glutamate receptor, metabotropic 7	ENSMUSG00000056755	2846.76	-0.0652639	0.0381813	-1.70932	0.0873924	0.915605
76787	Ppfia3	protein tyrosine phosphatase, receptor type, f polypeptide (PTPRF), interacting protein (liprin), alpha 3	ENSMUSG00000003863	7697.16	-0.0494674	0.0290859	-1.70073	0.0889929	0.915605
22141	Tub	tubby bipartite transcription factor	ENSMUSG00000031028	6473.79	0.0518885	0.0304108	1.70625	0.0879611	0.915605
546071	Mast3	microtubule associated serine/threonine kinase 3	ENSMUSG00000031833	12845.2	-0.0525087	0.0308	-1.70483	0.0882259	0.915605
67873	Mri1	methylthioribose-1-phosphate isomerase 1	ENSMUSG00000004996	335.638	-0.0854577	0.0501343	-1.70458	0.0882735	0.915605
19651	Rbl2	RB transcriptional corepressor like 2	ENSMUSG00000031666	791.875	-0.0854487	0.0500813	-1.7062	0.0879708	0.915605
218756	Slc4a7	solute carrier family 4, sodium bicarbonate cotransporter, member 7	ENSMUSG00000021733	1628.55	-0.0714753	0.0420557	-1.69954	0.0892182	0.915605
18530	Pcdh8	protocadherin 8	ENSMUSG00000036422	2637.57	-0.0690181	0.0406165	-1.69926	0.0892701	0.915605
211712	Pcdh9	protocadherin 9	ENSMUSG00000055421	4308.35	0.0655007	0.0383537	1.70781	0.0876721	0.915605
19941	Rpl26	ribosomal protein L26	ENSMUSG00000060938	966.854	0.0787253	0.0462938	1.70056	0.0890259	0.915605
20115	Rps7	ribosomal protein S7	ENSMUSG00000061477	1497.65	-0.077452	0.0454037	-1.70585	0.0880355	0.915605
320244	Ttll5	tubulin tyrosine ligase-like family, member 5	ENSMUSG00000012609	683.643	0.0822286	0.0483359	1.70119	0.0889075	0.915605
14904	Gtpbp1	GTP binding protein 1	ENSMUSG00000042535	1646.96	-0.0741877	0.0435533	-1.70338	0.0884977	0.915605
58234	Shank3	SH3 and multiple ankyrin repeat domains 3	ENSMUSG00000022623	10452.8	0.0538016	0.0314582	1.71026	0.0872183	0.915605
72555	Shisa9	shisa family member 9	ENSMUSG00000022494	1117.18	0.0824808	0.0481991	1.71125	0.0870345	0.915605
11544	Adprh	ADP-ribosylarginine hydrolase	ENSMUSG00000002844	2520.15	-0.0712125	0.0417809	-1.70443	0.0883015	0.915605
57908	Zfp318	zinc finger protein 318	ENSMUSG00000015597	1152.51	0.0822638	0.0480574	1.71178	0.0869368	0.915605
12725	Clcn3	chloride channel, voltage-sensitive 3	ENSMUSG00000004319	5436.7	-0.0582504	0.0343181	-1.69737	0.0896273	0.917745
66573	Dzip1	DAZ interacting protein 1	ENSMUSG00000042156	700.257	0.0829205	0.0488919	1.696	0.0898863	0.917745
102423	Hinfp	histone H4 transcription factor	ENSMUSG00000032119	585.821	0.0856088	0.0504833	1.69578	0.0899267	0.917745
268860	Abat	4-aminobutyrate aminotransferase	ENSMUSG00000057880	3663.45	0.0597445	0.0352302	1.69584	0.0899171	0.917745
52250	Reep1	receptor accessory protein 1	ENSMUSG00000052852	5061.26	0.0574492	0.0339112	1.69411	0.0902449	0.918788
73102	Slc22a23	solute carrier family 22, member 23	ENSMUSG00000038267	1118.79	0.0780505	0.0460729	1.69406	0.0902531	0.918788
67784	Plxnd1	plexin D1	ENSMUSG00000030123	1866.05	0.0783395	0.0463124	1.69155	0.0907327	0.922524
65114	Vps35	VPS35 retromer complex component	ENSMUSG00000031696	6144.45	0.0564934	0.0334201	1.6904	0.0909511	0.923599
109154	Mlec	malectin	ENSMUSG00000048578	3393.71	0.0648676	0.0383938	1.68953	0.0911172	0.923793
235072	2022-09-07	septin 7	ENSMUSG00000001833	8941.32	0.048555	0.0287457	1.68912	0.0911957	0.923793
29811	Ndrg2	N-myc downstream regulated gene 2	ENSMUSG00000004558	457.043	0.0851978	0.0504753	1.68791	0.0914284	0.923867
18193	Nsd1	nuclear receptor-binding SET-domain protein 1	ENSMUSG00000021488	4666.46	0.0616257	0.0364992	1.68841	0.0913319	0.923867
269994	Gsg1l	GSG1-like	ENSMUSG00000046182	509.724	0.068846	0.0408104	1.68697	0.0916088	0.924549
98952	Fam102a	family with sequence similarity 102, member A	ENSMUSG00000039157	2047.36	0.0677418	0.040263	1.68248	0.0924754	0.925057
12632	Cfl2	cofilin 2, muscle	ENSMUSG00000062929	1591.44	0.073289	0.0435717	1.68203	0.0925621	0.925057
18949	Pnn	pinin	ENSMUSG00000020994	934.304	-0.0815926	0.0484831	-1.68291	0.092393	0.925057
14432	Gap43	growth associated protein 43	ENSMUSG00000047261	10393.2	0.0604538	0.0358886	1.68449	0.0920875	0.925057
19252	Dusp1	dual specificity phosphatase 1	ENSMUSG00000024190	501.086	-0.0847737	0.0503818	-1.68263	0.0924476	0.925057
NA	NA	NA	ENSMUSG00000109836	1427.11	0.075538	0.0448924	1.68265	0.0924438	0.925057
29805	Znhit2	zinc finger, HIT domain containing 2	ENSMUSG00000075227	555.547	-0.0840228	0.0498827	-1.68441	0.0921027	0.925057
67590	Tctn3	tectonic family member 3	ENSMUSG00000025008	414.519	-0.0850646	0.0505427	-1.68302	0.0923705	0.925057
226751	Cdc42bpa	CDC42 binding protein kinase alpha	ENSMUSG00000026490	8199.95	0.0514965	0.0306825	1.67836	0.0932759	0.926012
27176	Rpl7a	ribosomal protein L7A	ENSMUSG00000062647	3374.84	0.0617424	0.0367853	1.67845	0.0932585	0.926012
109349	Fam163b	family with sequence similarity 163, member B	ENSMUSG00000009216	3409.76	-0.0717206	0.0427402	-1.67806	0.0933357	0.926012
214459	Fnbp1l	formin binding protein 1-like	ENSMUSG00000039735	1178.66	0.081217	0.0483766	1.67885	0.0931816	0.926012
69219	Ddah1	dimethylarginine dimethylaminohydrolase 1	ENSMUSG00000028194	510.993	0.0848823	0.0505073	1.6806	0.0928414	0.926012
75985	Rab30	RAB30, member RAS oncogene family	ENSMUSG00000030643	1006.73	-0.0779694	0.0464123	-1.67993	0.092971	0.926012
75805	Nln	neurolysin (metallopeptidase M3 family)	ENSMUSG00000021710	971.897	0.0774689	0.0461843	1.67739	0.0934669	0.926193
269639	Zfp512	zinc finger protein 512	ENSMUSG00000062761	1063.47	-0.0772297	0.046094	-1.67548	0.0938395	0.926524
235505	Cd109	CD109 antigen	ENSMUSG00000046186	772.616	-0.083905	0.0500468	-1.67653	0.0936339	0.926524
58226	Cacna1h	calcium channel, voltage-dependent, T type, alpha 1H subunit	ENSMUSG00000024112	3057.18	-0.0681432	0.0406678	-1.67561	0.0938156	0.926524
217201	Rundc1	RUN domain containing 1	ENSMUSG00000035007	1221.89	-0.0737851	0.0440608	-1.67462	0.0940085	0.927075
20687	Sp3	trans-acting transcription factor 3	ENSMUSG00000027109	1252.07	-0.0768228	0.0459496	-1.67189	0.0945452	0.92728
108937	Rnf169	ring finger protein 169	ENSMUSG00000058761	926.251	0.083299	0.0497978	1.67274	0.0943778	0.92728
67630	Samd8	sterile alpha motif domain containing 8	ENSMUSG00000021770	3590.47	-0.0656096	0.0392443	-1.67183	0.0945586	0.92728
76459	Car12	carbonic anhydrase 12	ENSMUSG00000032373	1525.83	-0.076487	0.0457108	-1.67328	0.0942721	0.92728
12424	Cck	cholecystokinin	ENSMUSG00000032532	9943.97	-0.0550942	0.0329611	-1.67149	0.0946243	0.92728
20742	Sptbn1	spectrin beta, non-erythrocytic 1	ENSMUSG00000020315	10941.8	0.051781	0.0309867	1.67107	0.0947082	0.92728
71691	Pnmal1	PNMA-like 1	ENSMUSG00000041141	5120.8	-0.059111	0.0353929	-1.67013	0.0948929	0.927544
20359	Sema6b	sema domain, transmembrane domain (TM), and cytoplasmic domain, (semaphorin) 6B	ENSMUSG00000001227	5868.49	-0.0524222	0.0313945	-1.66979	0.0949615	0.927544
74186	Ccdc3	coiled-coil domain containing 3	ENSMUSG00000026676	670.22	0.0817215	0.0489989	1.66782	0.0953507	0.929131
26417	Mapk3	mitogen-activated protein kinase 3	ENSMUSG00000063065	3039.19	0.0741965	0.0444744	1.66829	0.0952572	0.929131
226499	BC003331	cDNA sequence BC003331	ENSMUSG00000006010	913.927	0.0794784	0.047725	1.66534	0.0958449	0.929165
232370	Clstn3	calsyntenin 3	ENSMUSG00000008153	18902.4	-0.0483494	0.0290108	-1.6666	0.0955943	0.929165
72368	Borcs8	BLOC-1 related complex subunit 8	ENSMUSG00000002345	352.444	-0.0835616	0.050124	-1.6671	0.0954951	0.929165
105980076	Gm45929	predicted gene, 45929	ENSMUSG00000002345	352.444	-0.0835616	0.050124	-1.6671	0.0954951	0.929165
239985	Arid1b	AT rich interactive domain 1B (SWI-like)	ENSMUSG00000069729	3883.83	0.0600808	0.0360709	1.66563	0.0957869	0.929165
58523	Elp2	elongator acetyltransferase complex subunit 2	ENSMUSG00000024271	2852.9	-0.0616136	0.0370061	-1.66496	0.0959211	0.929165
12537	Cdk11b	cyclin-dependent kinase 11B	ENSMUSG00000029062	1440.33	0.0786119	0.0473319	1.66086	0.0967408	0.935998
231440	Parm1	prostate androgen-regulated mucin-like protein 1	ENSMUSG00000034981	2679.22	0.0644078	0.0388513	1.6578	0.0973573	0.940275
69718	Ipmk	inositol polyphosphate multikinase	ENSMUSG00000060733	1019.22	0.0769105	0.0464006	1.65753	0.0974122	0.940275
233065	Alkbh6	alkB homolog 6	ENSMUSG00000042831	396.531	-0.0837503	0.050575	-1.65596	0.0977294	0.94183
239606	Slc2a13	solute carrier family 2 (facilitated glucose transporter), member 13	ENSMUSG00000036298	1992.62	-0.0668337	0.0403733	-1.65539	0.0978446	0.94183
210573	Tmem151b	transmembrane protein 151B	ENSMUSG00000096847	5164.71	-0.0606024	0.036617	-1.65503	0.0979181	0.94183
18032	Nfix	nuclear factor I/X	ENSMUSG00000001911	15648.5	-0.0578709	0.0349853	-1.65415	0.0980972	0.942446
98432	Phlpp1	PH domain and leucine rich repeat protein phosphatase 1	ENSMUSG00000044340	2012.79	-0.0673977	0.0407622	-1.65343	0.0982424	0.942736
69568	Vkorc1l1	vitamin K epoxide reductase complex, subunit 1-like 1	ENSMUSG00000066735	1716.1	0.0672602	0.0406957	1.65276	0.0983796	0.942948
NA	NA	NA	ENSMUSG00000110523	365.711	0.0835305	0.0505752	1.65161	0.098614	0.944036
12867	Cox7c	cytochrome c oxidase subunit VIIc	ENSMUSG00000017778	1177.99	0.0728707	0.0441504	1.65051	0.0988386	0.944036
13877	Erh	ERH mRNA splicing and mitosis factor	ENSMUSG00000021131	506.272	-0.0829955	0.0502829	-1.65057	0.0988264	0.944036
54380	Smarcal1	SWI/SNF related matrix associated, actin dependent regulator of chromatin, subfamily a-like 1	ENSMUSG00000039354	1141.44	-0.0739383	0.0448458	-1.64872	0.0992041	0.944353
229521	Syt11	synaptotagmin XI	ENSMUSG00000068923	27444.7	-0.043001	0.0261034	-1.64733	0.0994898	0.944353
53902	Rcan3	regulator of calcineurin 3	ENSMUSG00000059713	336.424	0.0819177	0.049751	1.64655	0.0996497	0.944353
100683	Trrap	transformation/transcription domain-associated protein	ENSMUSG00000045482	2736.44	-0.0626254	0.0380763	-1.64474	0.100024	0.944353
233908	Fus	fused in sarcoma	ENSMUSG00000030795	5929.25	-0.05479	0.033237	-1.64846	0.0992575	0.944353
66822	Fbxo25	F-box protein 25	ENSMUSG00000038365	2105.59	-0.0734737	0.0446343	-1.64613	0.0997373	0.944353
107566	Arl2bp	ADP-ribosylation factor-like 2 binding protein	ENSMUSG00000031776	1906.87	0.065388	0.0397527	1.64487	0.0999965	0.944353
23939	Mapk7	mitogen-activated protein kinase 7	ENSMUSG00000001034	593.228	-0.0825216	0.0501661	-1.64497	0.0999768	0.944353
67283	Slc25a19	solute carrier family 25 (mitochondrial thiamine pyrophosphate carrier), member 19	ENSMUSG00000020744	788.936	0.0795243	0.0482503	1.64816	0.0993196	0.944353
105352	Dusp22	dual specificity phosphatase 22	ENSMUSG00000069255	480.391	0.0826509	0.0501813	1.64705	0.0995484	0.944353
209224	Enox2	ecto-NOX disulfide-thiol exchanger 2	ENSMUSG00000031109	995.246	0.0753274	0.045853	1.6428	0.100424	0.944746
100972	Rab28	RAB28, member RAS oncogene family	ENSMUSG00000029128	626.408	0.0812751	0.0495173	1.64135	0.100725	0.944746
11517	Adcyap1r1	adenylate cyclase activating polypeptide 1 receptor 1	ENSMUSG00000029778	2064.06	0.0716326	0.0436699	1.64032	0.100939	0.944746
79362	Bhlhe41	basic helix-loop-helix family, member e41	ENSMUSG00000030256	421.515	0.0827845	0.0504758	1.64008	0.100988	0.944746
22110	Tspyl1	testis-specific protein, Y-encoded-like 1	ENSMUSG00000047514	6047.43	-0.0547586	0.0333738	-1.64077	0.100846	0.944746
238799	Tnpo1	transportin 1	ENSMUSG00000009470	894.793	-0.0785599	0.0478642	-1.64131	0.100734	0.944746
17171	Mas1	MAS1 oncogene	ENSMUSG00000068037	1091.16	-0.0764871	0.0465889	-1.64175	0.100643	0.944746
224824	Pex6	peroxisomal biogenesis factor 6	ENSMUSG00000002763	1404.57	-0.0741267	0.0451523	-1.6417	0.100652	0.944746
70892	Ttll7	tubulin tyrosine ligase-like family, member 7	ENSMUSG00000036745	7203.83	0.0487454	0.0297348	1.63934	0.101143	0.945113
59014	Rrs1	ribosome biogenesis regulator 1	ENSMUSG00000061024	575.896	-0.0807556	0.0493604	-1.63604	0.101831	0.948303
72828	Ubash3b	ubiquitin associated and SH3 domain containing, B	ENSMUSG00000032020	857.666	-0.0785729	0.0480202	-1.63625	0.101788	0.948303
108737	Oxsr1	oxidative-stress responsive 1	ENSMUSG00000036737	1028.76	0.0764285	0.0466866	1.63706	0.101619	0.948303
14812	Grin2b	glutamate receptor, ionotropic, NMDA2B (epsilon 2)	ENSMUSG00000030209	22389.9	0.0809978	0.0495429	1.6349	0.10207	0.949447
19099	Mapk8ip1	mitogen-activated protein kinase 8 interacting protein 1	ENSMUSG00000027223	9864.7	-0.0489744	0.0299759	-1.63379	0.102303	0.949724
12426	Cckbr	cholecystokinin B receptor	ENSMUSG00000030898	636.833	0.0825818	0.0505503	1.63365	0.102331	0.949724
26936	Mprip	myosin phosphatase Rho interacting protein	ENSMUSG00000005417	4386.58	-0.060504	0.0370904	-1.63126	0.102836	0.952254
19317	Qk	quaking	ENSMUSG00000062078	1096.42	0.0752243	0.0461064	1.63154	0.102777	0.952254
77683	Ehmt1	euchromatic histone methyltransferase 1	ENSMUSG00000036893	1134.83	-0.0722303	0.0443602	-1.62827	0.103468	0.955508
74192	Arpc5l	actin related protein 2/3 complex, subunit 5-like	ENSMUSG00000026755	1284.71	-0.0734271	0.0455827	-1.61085	0.107212	0.955508
80976	Syt13	synaptotagmin XIII	ENSMUSG00000027220	7351.08	-0.0813754	0.050503	-1.6113	0.107115	0.955508
69702	Ndufaf1	NADH dehydrogenase (ubiquinone) 1 alpha subcomplex, assembly factor 1	ENSMUSG00000027305	527.076	-0.0813327	0.0501155	-1.6229	0.10461	0.955508
11364	Acadm	acyl-Coenzyme A dehydrogenase, medium chain	ENSMUSG00000062908	377.96	-0.0816515	0.0502184	-1.62593	0.103965	0.955508
230085	Phf24	PHD finger protein 24	ENSMUSG00000036062	6523.07	0.0633228	0.0392838	1.61193	0.106977	0.955508
18124	Nr4a3	nuclear receptor subfamily 4, group A, member 3	ENSMUSG00000028341	8668.41	-0.0484876	0.0298466	-1.62456	0.104256	0.955508
100986	Akap9	A kinase (PRKA) anchor protein (yotiao) 9	ENSMUSG00000040407	1084.47	0.0750076	0.0462536	1.62166	0.104877	0.955508
21982	Tmem165	transmembrane protein 165	ENSMUSG00000029234	629.885	0.0800395	0.0496102	1.61337	0.106664	0.955508
68955	Srrm4	serine/arginine repetitive matrix 4	ENSMUSG00000063919	2213.1	0.0643588	0.0399698	1.61019	0.107357	0.955508
94282	Sfxn5	sideroflexin 5	ENSMUSG00000033720	1210.21	0.0739409	0.0456643	1.61923	0.105398	0.955508
330485	Tmem145	transmembrane protein 145	ENSMUSG00000043843	736.066	0.0788447	0.0487702	1.61666	0.105952	0.955508
269878	Megf8	multiple EGF-like-domains 8	ENSMUSG00000045039	6239.78	-0.0582726	0.0361465	-1.61212	0.106935	0.955508
18223	Numbl	numb-like	ENSMUSG00000063160	6672.19	-0.0507169	0.031369	-1.61679	0.105924	0.955508
233271	Luzp2	leucine zipper protein 2	ENSMUSG00000063297	2179.14	-0.0686834	0.0425425	-1.61447	0.106426	0.955508
14407	Gabrg3	gamma-aminobutyric acid (GABA) A receptor, subunit gamma 3	ENSMUSG00000055026	966.118	0.0757754	0.0466718	1.62358	0.104466	0.955508
54376	Cacng3	calcium channel, voltage-dependent, gamma subunit 3	ENSMUSG00000066189	1524.92	0.0728936	0.0447965	1.62722	0.103691	0.955508
214764	Edrf1	erythroid differentiation regulatory factor 1	ENSMUSG00000039990	910.691	-0.0784003	0.0485061	-1.6163	0.10603	0.955508
56533	Rgs17	regulator of G-protein signaling 17	ENSMUSG00000019775	1978.66	0.0671518	0.0414846	1.61872	0.105508	0.955508
27204	Syn3	synapsin III	ENSMUSG00000059602	401.688	-0.0811476	0.0502664	-1.61435	0.106452	0.955508
77733	Rnf170	ring finger protein 170	ENSMUSG00000013878	428.284	0.0815895	0.0505319	1.61461	0.106395	0.955508
11886	Asah1	N-acylsphingosine amidohydrolase 1	ENSMUSG00000031591	647.462	0.0795885	0.0489776	1.625	0.104163	0.955508
65107	Lrp10	low-density lipoprotein receptor-related protein 10	ENSMUSG00000022175	931.183	-0.0762875	0.0470876	-1.62012	0.105207	0.955508
66435	Uggt2	UDP-glucose glycoprotein glucosyltransferase 2	ENSMUSG00000042104	488.643	-0.0815478	0.0504473	-1.61649	0.105988	0.955508
12402	Cbl	Casitas B-lineage lymphoma	ENSMUSG00000034342	2716.27	0.0659302	0.040949	1.61006	0.107385	0.955508
69459	Ubl7	ubiquitin-like 7 (bone marrow stromal cell-derived)	ENSMUSG00000055720	2224.26	0.0646066	0.0401112	1.61069	0.107248	0.955508
76508	Ube2d-ps	ubiquitin-conjugating enzyme E2D, pseudogene	ENSMUSG00000083844	346.585	0.0820269	0.0504524	1.62583	0.103986	0.955508
22318	Vamp2	vesicle-associated membrane protein 2	ENSMUSG00000020894	43992.6	0.0394255	0.0244117	1.61502	0.106305	0.955508
68729	Trim37	tripartite motif-containing 37	ENSMUSG00000018548	12369.5	0.0451712	0.0278607	1.62133	0.104948	0.955508
68732	Carmil1	capping protein regulator and myosin 1 linker 1	ENSMUSG00000021338	380.582	0.0819653	0.0505133	1.62265	0.104665	0.955508
78689	Naa35	N(alpha)-acetyltransferase 35, NatC auxiliary subunit	ENSMUSG00000021555	1107.74	0.0735526	0.0454092	1.61977	0.105281	0.955508
12565	Cdh9	cadherin 9	ENSMUSG00000025370	1319.43	-0.0733517	0.0453789	-1.61643	0.106002	0.955508
57259	Tob2	transducer of ERBB2, 2	ENSMUSG00000048546	481.789	-0.0814263	0.0501735	-1.62289	0.104612	0.955508
67501	Ccdc50	coiled-coil domain containing 50	ENSMUSG00000038127	1474.78	0.0691731	0.0429074	1.61215	0.10693	0.955508
15925	Ide	insulin degrading enzyme	ENSMUSG00000056999	2589.69	0.057848	0.0358598	1.61317	0.106707	0.955508
71653	Shtn1	shootin 1	ENSMUSG00000041362	1243.19	0.0792242	0.0491365	1.61233	0.10689	0.955508
56323	Dnajb5	DnaJ heat shock protein family (Hsp40) member B5	ENSMUSG00000036052	6893.06	-0.0543837	0.0338043	-1.60878	0.107664	0.956952
272359	Irf2bp1	interferon regulatory factor 2 binding protein 1	ENSMUSG00000044030	1269.13	-0.0718614	0.0446991	-1.60767	0.107907	0.957031
103236	Csnk1g2	casein kinase 1, gamma 2	ENSMUSG00000003345	2657.74	0.0657563	0.0408992	1.60777	0.107886	0.957031
11775	Ap3b2	adaptor-related protein complex 3, beta 2 subunit	ENSMUSG00000062444	6609.36	-0.0497461	0.0309945	-1.605	0.108494	0.960884
216848	Chd3	chromodomain helicase DNA binding protein 3	ENSMUSG00000018474	23347.5	0.0487196	0.030362	1.60463	0.108576	0.960884
84036	Kcnn1	potassium intermediate/small conductance calcium-activated channel, subfamily N, member 1	ENSMUSG00000002908	708.028	0.0776171	0.0483972	1.60375	0.108769	0.961552
329739	Fam102b	family with sequence similarity 102, member B	ENSMUSG00000040339	1075.43	-0.0731408	0.0456266	-1.60303	0.108928	0.961923
445007	Nup85	nucleoporin 85	ENSMUSG00000020739	532.254	0.0796247	0.0497226	1.60138	0.109293	0.964111
12570	Cdk5r2	cyclin-dependent kinase 5, regulatory subunit 2 (p39)	ENSMUSG00000090071	12587.5	0.0474045	0.0296383	1.59944	0.109724	0.966867
15505	Hsph1	heat shock 105kDa/110kDa protein 1	ENSMUSG00000029657	12718	-0.0541637	0.0338768	-1.59885	0.109855	0.966929
114479	Slc5a5	solute carrier family 5 (sodium iodide symporter), member 5	ENSMUSG00000000792	389.598	-0.0253579	0.0158651	-1.59834	0.109967	0.966929
215378	Brinp3	bone morphogenetic protein/retinoic acid inducible neural specific 3	ENSMUSG00000035131	349.512	0.0760301	0.0476816	1.59454	0.110816	0.966996
69726	Smyd3	SET and MYND domain containing 3	ENSMUSG00000055067	785.576	0.0769296	0.0483216	1.59203	0.111377	0.966996
98970	Fibcd1	fibrinogen C domain containing 1	ENSMUSG00000026841	9947.89	0.0545301	0.0342519	1.59203	0.111378	0.966996
245643	Frmpd3	FERM and PDZ domain containing 3	ENSMUSG00000042425	1360.51	-0.0680319	0.0427906	-1.58988	0.111862	0.966996
320938	Tnpo3	transportin 3	ENSMUSG00000012535	2271.46	-0.0635208	0.0398602	-1.59359	0.111028	0.966996
244058	Rgma	repulsive guidance molecule family member A	ENSMUSG00000070509	1547.82	0.0774568	0.0485349	1.5959	0.110511	0.966996
20408	Sh3gl3	SH3-domain GRB2-like 3	ENSMUSG00000030638	456.931	0.0803497	0.0504292	1.59332	0.111089	0.966996
54473	Tollip	toll interacting protein	ENSMUSG00000025139	5973	-0.0507434	0.0319086	-1.59027	0.111773	0.966996
18186	Nrp1	neuropilin 1	ENSMUSG00000025810	3780.44	-0.0562794	0.0352461	-1.59676	0.11032	0.966996
26398	Map2k4	mitogen-activated protein kinase kinase 4	ENSMUSG00000033352	9227.88	0.0477744	0.0300312	1.59082	0.111649	0.966996
216869	Arrb2	arrestin, beta 2	ENSMUSG00000060216	1155.48	-0.0710455	0.0446023	-1.59287	0.11119	0.966996
142688	Asb13	ankyrin repeat and SOCS box-containing 13	ENSMUSG00000033781	971.987	0.0756658	0.0474389	1.59502	0.110708	0.966996
14026	Evl	Ena-vasodilator stimulated phosphoprotein	ENSMUSG00000021262	2432.08	0.0677497	0.042448	1.59606	0.110475	0.966996
67739	Slc48a1	solute carrier family 48 (heme transporter), member 1	ENSMUSG00000081534	1518.96	0.0661904	0.0416314	1.58992	0.111854	0.966996
56149	Grasp	GRP1 (general receptor for phosphoinositides 1)-associated scaffold protein	ENSMUSG00000000531	2402.28	-0.0678001	0.0426166	-1.59093	0.111625	0.966996
72747	Ttc39c	tetratricopeptide repeat domain 39C	ENSMUSG00000024424	833.603	-0.0765794	0.0480482	-1.5938	0.11098	0.966996
13528	Dtnb	dystrobrevin, beta	ENSMUSG00000071454	1836.16	0.0689138	0.0433698	1.58898	0.112064	0.96772
14348	Fut9	fucosyltransferase 9	ENSMUSG00000055373	1768.68	0.0722182	0.0454811	1.58787	0.112315	0.968753
110695	Aldh7a1	aldehyde dehydrogenase family 7, member A1	ENSMUSG00000053644	735.363	-0.076384	0.0481187	-1.58741	0.11242	0.968753
11496	Adam22	a disintegrin and metallopeptidase domain 22	ENSMUSG00000040537	5844.77	0.0505558	0.0318734	1.58614	0.112707	0.969498
26875	Pclo	piccolo (presynaptic cytomatrix protein)	ENSMUSG00000061601	4150.77	0.0801487	0.0505523	1.58546	0.112862	0.969498
13194	Ddb1	damage specific DNA binding protein 1	ENSMUSG00000024740	9074.01	-0.0479107	0.0302143	-1.58569	0.112809	0.969498
13628	Eef1a2	eukaryotic translation elongation factor 1 alpha 2	ENSMUSG00000016349	32141.5	-0.0454592	0.0287678	-1.58021	0.114058	0.970253
22201	Uba1	ubiquitin-like modifier activating enzyme 1	ENSMUSG00000001924	15663.4	-0.0434911	0.027531	-1.57971	0.114172	0.970253
19172	Psmb4	proteasome (prosome, macropain) subunit, beta type 4	ENSMUSG00000005779	2620.03	-0.0581975	0.036813	-1.5809	0.113902	0.970253
384763	Zfp667	zinc finger protein 667	ENSMUSG00000054893	472.963	-0.0800732	0.050556	-1.58385	0.113228	0.970253
17258	Mef2a	myocyte enhancer factor 2A	ENSMUSG00000030557	7384.61	0.0502162	0.0317987	1.57919	0.114292	0.970253
67023	Use1	unconventional SNARE in the ER 1 homolog (S. cerevisiae)	ENSMUSG00000002395	366.838	-0.0798259	0.0505419	-1.5794	0.114244	0.970253
23821	Bace1	beta-site APP cleaving enzyme 1	ENSMUSG00000032086	5621.95	0.0578999	0.0366722	1.57885	0.11437	0.970253
217340	Rnf157	ring finger protein 157	ENSMUSG00000052949	12175.8	0.054376	0.0343593	1.58257	0.11352	0.970253
56705	Ranbp9	RAN binding protein 9	ENSMUSG00000038546	2705.03	0.0664894	0.0421044	1.57916	0.1143	0.970253
239393	Lrp12	low density lipoprotein-related protein 12	ENSMUSG00000022305	1853.71	-0.0701243	0.0443894	-1.57975	0.114164	0.970253
93687	Csnk1a1	casein kinase 1, alpha 1	ENSMUSG00000024576	10449.6	-0.0467132	0.0295379	-1.58147	0.113771	0.970253
18569	Pdcd4	programmed cell death 4	ENSMUSG00000024975	2954.6	0.0634571	0.0400753	1.58345	0.113319	0.970253
269181	Mgat4a	mannoside acetylglucosaminyltransferase 4, isoenzyme A	ENSMUSG00000026110	1025.19	-0.074543	0.047256	-1.57743	0.114697	0.972019
67426	Coq8a	coenzyme Q8A	ENSMUSG00000026489	1539.34	-0.0745539	0.0473447	-1.5747	0.115325	0.973314
67048	Vma21	VMA21 vacuolar H+-ATPase homolog (S. cerevisiae)	ENSMUSG00000073131	1176.7	0.0710614	0.0451082	1.57536	0.115174	0.973314
20349	Sema3e	sema domain, immunoglobulin domain (Ig), short basic domain, secreted, (semaphorin) 3E	ENSMUSG00000063531	4343.84	-0.0623783	0.0395784	-1.57607	0.11501	0.973314
209225	Zfp710	zinc finger protein 710	ENSMUSG00000048897	639.12	0.0778601	0.0494406	1.57482	0.115298	0.973314
26557	Homer2	homer scaffolding protein 2	ENSMUSG00000025813	2406.51	0.0706641	0.044906	1.5736	0.11558	0.974461
241324	Crb2	crumbs family member 2	ENSMUSG00000035403	337.906	-0.0794781	0.0505748	-1.57149	0.116068	0.97757
100043272	Inafm2	InaF motif containing 2	ENSMUSG00000074918	1063.05	-0.0728225	0.0463566	-1.57092	0.116201	0.977691
277414	Trp53i11	transformation related protein 53 inducible protein 11	ENSMUSG00000068735	1201.93	-0.0754565	0.0480688	-1.56976	0.116471	0.978033
232286	Tmf1	TATA element modulatory factor 1	ENSMUSG00000030059	953.301	0.073122	0.0465829	1.56972	0.116481	0.978033
229707	Strip1	striatin interacting protein 1	ENSMUSG00000014601	3386.85	-0.0556748	0.0354955	-1.5685	0.116764	0.979409
227638	Qsox2	quiescin Q6 sulfhydryl oxidase 2	ENSMUSG00000036327	959.164	-0.0750352	0.047876	-1.56728	0.117049	0.980795
29867	Cabp1	calcium binding protein 1	ENSMUSG00000029544	1827.26	-0.0644233	0.0411621	-1.56511	0.117557	0.982394
68089	Arpc4	actin related protein 2/3 complex, subunit 4	ENSMUSG00000079426	3883.76	-0.0557755	0.0356374	-1.56508	0.117563	0.982394
106957	Slc39a6	solute carrier family 39 (metal ion transporter), member 6	ENSMUSG00000024270	1841.11	-0.0686005	0.0438362	-1.56493	0.1176	0.982394
333639	Mamld1	mastermind-like domain containing 1	ENSMUSG00000059401	1052.72	0.0722063	0.0461906	1.56323	0.117999	0.983421
59026	Huwe1	HECT, UBA and WWE domain containing 1	ENSMUSG00000025261	8357.32	0.051786	0.0331351	1.56287	0.118083	0.983421
207393	Elfn2	leucine rich repeat and fibronectin type III, extracellular 2	ENSMUSG00000043460	8361.69	-0.0476988	0.0305124	-1.56326	0.117992	0.983421
15939	Ier5	immediate early response 5	ENSMUSG00000056708	1301.35	-0.0722775	0.0462708	-1.56205	0.118275	0.984025
241062	Pgap1	post-GPI attachment to proteins 1	ENSMUSG00000073678	1232.13	0.0703107	0.0451205	1.55829	0.119166	0.984904
18597	Pdha1	pyruvate dehydrogenase E1 alpha 1	ENSMUSG00000031299	11979.4	0.0442838	0.0283995	1.55931	0.118922	0.984904
77963	Hook1	hook microtubule tethering protein 1	ENSMUSG00000028572	771.952	-0.0775992	0.0498395	-1.55698	0.119475	0.984904
55982	Paxip1	PAX interacting (with transcription-activation domain) protein 1	ENSMUSG00000002221	1175.2	0.0719341	0.0462442	1.55553	0.11982	0.984904
17855	Mvk	mevalonate kinase	ENSMUSG00000041939	488.813	0.0781997	0.0502709	1.55557	0.119811	0.984904
100561	Slc15a4	solute carrier family 15, member 4	ENSMUSG00000029416	488.687	-0.0783899	0.0504517	-1.55376	0.120241	0.984904
18181	Nrf1	nuclear respiratory factor 1	ENSMUSG00000058440	397.867	-0.0783584	0.050538	-1.55049	0.121025	0.984904
18139	Zfp638	zinc finger protein 638	ENSMUSG00000030016	1979.42	0.0612944	0.0395179	1.55105	0.120889	0.984904
108841	Rdh13	retinol dehydrogenase 13 (all-trans and 9-cis)	ENSMUSG00000008435	605.347	0.0765713	0.0492872	1.55357	0.120286	0.984904
330474	Zc3h4	zinc finger CCCH-type containing 4	ENSMUSG00000059273	2361.64	0.0599337	0.0385628	1.55418	0.120141	0.984904
237400	Mex3d	mex3 RNA binding family member D	ENSMUSG00000048696	410.968	-0.0789101	0.0505966	-1.55959	0.118856	0.984904
74549	Mau2	MAU2 sister chromatid cohesion factor	ENSMUSG00000031858	2080.27	0.0703094	0.045191	1.55583	0.119749	0.984904
103583	Fbxw11	F-box and WD-40 domain protein 11	ENSMUSG00000020271	4875	-0.05301	0.0339814	-1.55997	0.118767	0.984904
14799	Gria1	glutamate receptor, ionotropic, AMPA1 (alpha 1)	ENSMUSG00000020524	33328	-0.0490166	0.0315895	-1.55167	0.12074	0.984904
216877	Dhx33	DEAH (Asp-Glu-Ala-His) box polypeptide 33	ENSMUSG00000040620	1274.69	-0.0728297	0.04667	-1.56052	0.118636	0.984904
11951	Atp5g1	ATP synthase, H+ transporting, mitochondrial F0 complex, subunit C1 (subunit 9)	ENSMUSG00000006057	4589.85	0.0537065	0.0346309	1.55083	0.120943	0.984904
26914	H2afy	H2A histone family, member Y	ENSMUSG00000015937	1701.32	-0.0656309	0.0422263	-1.55426	0.120121	0.984904
52882	Rgs7bp	regulator of G-protein signalling 7 binding protein	ENSMUSG00000021719	9265	-0.0460648	0.0296971	-1.55116	0.120864	0.984904
94090	Trim9	tripartite motif-containing 9	ENSMUSG00000021071	12558.4	-0.0455512	0.0292248	-1.55865	0.11908	0.984904
22770	Zhx1	zinc fingers and homeoboxes 1	ENSMUSG00000022361	2057.03	0.0609168	0.0392188	1.55325	0.120363	0.984904
380969	Nckap5l	NCK-associated protein 5-like	ENSMUSG00000023009	1156.17	0.0702164	0.0452222	1.5527	0.120495	0.984904
223922	Atf7	activating transcription factor 7	ENSMUSG00000099083	445.388	0.0783412	0.0504487	1.55289	0.12045	0.984904
72612	Hpf1	histone PARylation factor 1	ENSMUSG00000038005	591.262	0.076364	0.0492848	1.54944	0.121275	0.985963
14218	Sh3pxd2a	SH3 and PX domains 2A	ENSMUSG00000053617	2752.01	-0.0592054	0.0382547	-1.54766	0.121704	0.988466
212285	Arap2	ArfGAP with RhoGAP domain, ankyrin repeat and PH domain 2	ENSMUSG00000037999	1982.48	0.061652	0.0399	1.54516	0.122307	0.991537
192156	Mvd	mevalonate (diphospho) decarboxylase	ENSMUSG00000006517	650.029	0.0755379	0.0488889	1.54509	0.122324	0.991537
80292	Zxdc	ZXD family zinc finger C	ENSMUSG00000034430	747.277	-0.0747458	0.0483997	-1.54434	0.122505	0.992025
17207	Mcf2l	mcf.2 transforming sequence-like	ENSMUSG00000031442	3317.03	-0.0560317	0.0363265	-1.54245	0.122965	0.993785
15511	Hspa1b	heat shock protein 1B	ENSMUSG00000090877	393.628	-0.0771268	0.0499876	-1.54292	0.122851	0.993785
100503659	Cbarp	calcium channel, voltage-dependent, beta subunit associated regulatory protein	ENSMUSG00000035640	12737.4	-0.0479439	0.0311211	-1.54056	0.123424	0.996511
107515	Lgr4	leucine-rich repeat-containing G protein-coupled receptor 4	ENSMUSG00000050199	506.149	-0.0777476	0.0505786	-1.53716	0.124253	0.99731
22222	Ubr1	ubiquitin protein ligase E3 component n-recognin 1	ENSMUSG00000027272	1721.55	0.0688781	0.0447577	1.53891	0.123826	0.99731
67126	Atp5e	ATP synthase, H+ transporting, mitochondrial F1 complex, epsilon subunit	ENSMUSG00000016252	538.185	-0.0775657	0.0504287	-1.53813	0.124018	0.99731
26414	Mapk10	mitogen-activated protein kinase 10	ENSMUSG00000046709	13640.1	0.044912	0.0292055	1.53779	0.1241	0.99731
237253	Lrp11	low density lipoprotein receptor-related protein 11	ENSMUSG00000019796	7200.37	-0.0468547	0.0304636	-1.53805	0.124035	0.99731
NA	NA	NA	ENSMUSG00000113184	389.089	0.0777787	0.050598	1.53719	0.124247	0.99731
74552	Nipal3	NIPA-like domain containing 3	ENSMUSG00000028803	3558.68	0.0537727	0.0349951	1.53658	0.124397	0.997488
241688	Dzank1	double zinc ribbon and ankyrin repeat domains 1	ENSMUSG00000037259	5781.8	0.0506415	0.0330265	1.53336	0.125188	0.998522
14086	Fscn1	fascin actin-bundling protein 1	ENSMUSG00000029581	11625	-0.0501074	0.0326604	-1.53419	0.124982	0.998522
58909	Fam13a	family with sequence similarity 13, member A	ENSMUSG00000037709	505.777	-0.0772037	0.0502963	-1.53498	0.124789	0.998522
74525	Fam234b	family with sequence similarity 234, member B	ENSMUSG00000030207	5843.05	-0.0547354	0.0356496	-1.53537	0.124693	0.998522
54006	Deaf1	DEAF1, transcription factor	ENSMUSG00000058886	2063.58	0.0652332	0.0425505	1.53308	0.125257	0.998522
22630	Ywhaq	tyrosine 3-monooxygenase/tryptophan 5-monooxygenase activation protein theta	ENSMUSG00000076432	7204.74	-0.0528957	0.0345002	-1.5332	0.125226	0.998522
497097	Xkr4	X-linked Kx blood group related 4	ENSMUSG00000051951	1563.71	-0.0503207	0.0428275	-1.17496	0.24001	0.999135
18777	Lypla1	lysophospholipase 1	ENSMUSG00000025903	420.651	-0.00441413	0.0505053	-0.0873994	0.930354	0.999135
21399	Tcea1	transcription elongation factor A (SII) 1	ENSMUSG00000033813	1277.63	0.0100878	0.0451886	0.223238	0.82335	0.999135
108664	Atp6v1h	ATPase, H+ transporting, lysosomal V1 subunit H	ENSMUSG00000033793	5068.71	0.00842604	0.0329386	0.25581	0.798097	0.999135
12421	Rb1cc1	RB1-inducible coiled-coil 1	ENSMUSG00000025907	2160.26	-0.0331266	0.0386506	-0.857078	0.391402	0.999135
240690	St18	suppression of tumorigenicity 18	ENSMUSG00000033740	1398.88	0.037481	0.0448764	0.835205	0.403602	0.999135
319263	Pcmtd1	protein-L-isoaspartate (D-aspartate) O-methyltransferase domain containing 1	ENSMUSG00000051285	2019.9	-0.0163002	0.0421395	-0.386815	0.698893	0.999135
71096	Sntg1	syntrophin, gamma 1	ENSMUSG00000025909	529.394	0.0114306	0.0500288	0.228481	0.819273	0.999135
76982	3110035E14Rik	RIKEN cDNA 3110035E14 gene	ENSMUSG00000067879	10342.5	0.0158927	0.0338295	0.46979	0.638505	0.999135
70675	Vcpip1	valosin containing protein (p97)/p47 complex interacting protein 1	ENSMUSG00000045210	3313.74	0.0231306	0.03761	0.615012	0.538547	0.999135
26754	Cops5	COP9 signalosome subunit 5	ENSMUSG00000025917	1891.75	0.0235203	0.0403517	0.582883	0.559972	0.999135
211673	Arfgef1	ADP-ribosylation factor guanine nucleotide-exchange factor 1(brefeldin A-inhibited)	ENSMUSG00000067851	3986.14	-0.0396497	0.034143	-1.16128	0.245527	0.999135
320492	A830018L16Rik	RIKEN cDNA A830018L16 gene	ENSMUSG00000057715	2574.29	-0.00426121	0.038926	-0.10947	0.91283	0.999135
17978	Ncoa2	nuclear receptor coactivator 2	ENSMUSG00000005886	3015.41	-0.0542233	0.0377221	-1.43744	0.150593	0.999135
19989	Rpl7	ribosomal protein L7	ENSMUSG00000043716	2848.22	0.0193787	0.0363925	0.532492	0.594385	0.999135
29819	Stau2	staufen double-stranded RNA binding protein 2	ENSMUSG00000025920	3701.61	0.00741246	0.0384771	0.192646	0.847236	0.999135
66799	Ube2w	ubiquitin-conjugating enzyme E2W (putative)	ENSMUSG00000025939	1727.21	0.0161649	0.0419184	0.385629	0.699771	0.999135
67923	Eloc	elongin C	ENSMUSG00000079658	2100.14	-0.00387262	0.0414548	-0.093418	0.925571	0.999135
70397	Tmem70	transmembrane protein 70	ENSMUSG00000025940	1117.07	0.00285848	0.0460503	0.0620729	0.950505	0.999135
57339	Jph1	junctophilin 1	ENSMUSG00000042686	1004.2	0.00297773	0.0469917	0.0633671	0.949474	0.999135
14545	Gdap1	ganglioside-induced differentiation-associated-protein 1	ENSMUSG00000025777	5027.69	0.00289082	0.0335643	0.0861279	0.931365	0.999135
74229	Paqr8	progestin and adipoQ receptor family member VIII	ENSMUSG00000025931	2020.46	-0.0376297	0.0402652	-0.934546	0.350022	0.999135
75712	Tmem14a	transmembrane protein 14A	ENSMUSG00000025933	449.728	-0.0177053	0.0505522	-0.350237	0.726161	0.999135
226922	Kcnq5	potassium voltage-gated channel, subfamily Q, member 5	ENSMUSG00000028033	4757.93	-0.00218923	0.0339576	-0.0644694	0.948596	0.999135
116837	Rims1	regulating synaptic membrane exocytosis 1	ENSMUSG00000041670	6852.85	0.0273053	0.031408	0.869372	0.384644	0.999135
70155	Ogfrl1	opioid growth factor receptor-like 1	ENSMUSG00000026158	5419.26	-0.00163094	0.0350866	-0.0464832	0.962925	0.999135
280645	B3gat2	beta-1,3-glucuronyltransferase 2 (glucuronosyltransferase S)	ENSMUSG00000026156	632.941	-0.0266711	0.0499132	-0.534349	0.5931	0.999135
98366	Smap1	small ArfGAP 1	ENSMUSG00000026155	4518.96	0.0388549	0.0342697	1.1338	0.25688	0.999135
68187	Fam135a	family with sequence similarity 135, member A	ENSMUSG00000026153	511.1	-0.0222176	0.0500981	-0.443481	0.657418	0.999135
68421	Lmbrd1	LMBR1 domain containing 1	ENSMUSG00000073725	3406.97	0.0349504	0.0353882	0.987631	0.323333	0.999135
210933	Adgrb3	adhesion G protein-coupled receptor B3	ENSMUSG00000033569	4248.18	-0.0348985	0.0357379	-0.976514	0.32881	0.999135
213109	Phf3	PHD finger protein 3	ENSMUSG00000048874	1640.03	0.0615501	0.0416936	1.47625	0.139878	0.999135
19335	Rab23	RAB23, member RAS oncogene family	ENSMUSG00000004768	589.897	0.0192587	0.0492841	0.390768	0.695969	0.999135
98403	Zfp451	zinc finger protein 451	ENSMUSG00000042197	1403.93	0.0014883	0.0440532	0.0337842	0.973049	0.999135
320705	Bend6	BEN domain containing 6	ENSMUSG00000042182	1281.47	0.0545285	0.046466	1.17351	0.24059	0.999135
69668	Ccdc115	coiled-coil domain containing 115	ENSMUSG00000042111	444.847	-0.0139383	0.0503833	-0.276645	0.782053	0.999135
27993	Imp4	IMP4, U3 small nucleolar ribonucleoprotein	ENSMUSG00000026127	395.932	0.00481774	0.0505214	0.0953603	0.924029	0.999135
211383	Amer3	APC membrane recruitment 3	ENSMUSG00000045174	1992.94	-0.0589319	0.0417692	-1.4109	0.158276	0.999135
226970	Arhgef4	Rho guanine nucleotide exchange factor (GEF) 4	ENSMUSG00000037509	5169.04	0.00147316	0.0332357	0.0443246	0.964646	0.999135
214469	Fam168b	family with sequence similarity 168, member B	ENSMUSG00000037503	8945.79	-0.0183524	0.0327272	-0.560771	0.574954	0.999135
226971	Plekhb2	pleckstrin homology domain containing, family B (evectins) member 2	ENSMUSG00000026123	4956.72	0.00420108	0.0355604	0.118139	0.905957	0.999135
50785	Hs6st1	heparan sulfate 6-O-sulfotransferase 1	ENSMUSG00000045216	2240.87	-0.00620201	0.0406514	-0.152566	0.878741	0.999135
320011	Uggt1	UDP-glucose glycoprotein glucosyltransferase 1	ENSMUSG00000037470	1886.18	0.0127703	0.0413428	0.308887	0.757407	0.999135
226976	Kansl3	KAT8 regulatory NSL complex subunit 3	ENSMUSG00000010453	1696.2	-0.000698817	0.0434737	-0.0160745	0.987175	0.999135
214895	Lman2l	lectin, mannose-binding 2-like	ENSMUSG00000001143	1579.04	0.0356784	0.0426099	0.837326	0.40241	0.999135
94220	Cnnm4	cyclin M4	ENSMUSG00000037408	879.483	-0.0357971	0.0477314	-0.749969	0.453274	0.999135
94218	Cnnm3	cyclin M3	ENSMUSG00000001138	636.846	-0.0114742	0.0491456	-0.233474	0.815393	0.999135
12859	Cox5b	cytochrome c oxidase subunit Vb	ENSMUSG00000061518	3446	0.0497328	0.0351703	1.41405	0.157346	0.999135
226977	Actr1b	ARP1 actin-related protein 1B, centractin beta	ENSMUSG00000037351	7416.14	-0.0420608	0.0346458	-1.21402	0.22474	0.999135
269180	Inpp4a	inositol polyphosphate-4-phosphatase, type I	ENSMUSG00000026113	3750.55	0.0132467	0.0343174	0.386006	0.699492	0.999135
76178	Coa5	cytochrome C oxidase assembly factor 5	ENSMUSG00000026112	1022.43	0.0491171	0.046657	1.05273	0.292467	0.999135
67387	Unc50	unc-50 homolog (C. elegans)	ENSMUSG00000026111	573.93	-0.0325159	0.0498117	-0.652778	0.5139	0.999135
72097	2010300C02Rik	RIKEN cDNA 2010300C02 gene	ENSMUSG00000026090	14249.5	-0.025001	0.0310622	-0.804868	0.420896	0.999135
211484	Tsga10	testis specific 10	ENSMUSG00000060771	324.244	-0.0360755	0.0503655	-0.716274	0.473822	0.999135
107734	Mrpl30	mitochondrial ribosomal protein L30	ENSMUSG00000026087	626.625	0.0356106	0.049434	0.720367	0.471299	0.999135
98258	Txndc9	thioredoxin domain containing 9	ENSMUSG00000058407	988.804	-0.0254736	0.0455175	-0.559644	0.575722	0.999135
226982	Eif5b	eukaryotic translation initiation factor 5B	ENSMUSG00000026083	2063.44	0.040701	0.0410038	0.992616	0.320897	0.999135
56210	Rev1	REV1, DNA directed polymerase	ENSMUSG00000026082	638.197	0.0100371	0.0488321	0.205543	0.837148	0.999135
16764	Aff3	AF4/FMR2 family, member 3	ENSMUSG00000037138	2559.47	-0.0037099	0.0388543	-0.0954823	0.923932	0.999135
381338	Lonrf2	LON peptidase N-terminal domain and ring finger 2	ENSMUSG00000048814	8445.27	-0.00635266	0.0289686	-0.219295	0.82642	0.999135
98388	Chst10	carbohydrate sulfotransferase 10	ENSMUSG00000026080	1610.77	0.0367782	0.0447088	0.822615	0.410727	0.999135
114641	Rpl31	ribosomal protein L31	ENSMUSG00000073702	910.155	-0.000828434	0.0466196	-0.0177701	0.985822	0.999135
54610	Tbc1d8	TBC1 domain family, member 8	ENSMUSG00000003134	424.72	-0.0450564	0.0505589	-0.891165	0.372841	0.999135
52846	Cnot11	CCR4-NOT transcription complex, subunit 11	ENSMUSG00000003135	880.209	-0.00740924	0.0469908	-0.157674	0.874714	0.999135
263764	Creg2	cellular repressor of E1A-stimulated genes 2	ENSMUSG00000050967	6185.41	-0.0148723	0.033413	-0.445104	0.656244	0.999135
26921	Map4k4	mitogen-activated protein kinase kinase kinase kinase 4	ENSMUSG00000026074	3645.63	-0.0126682	0.0349273	-0.362701	0.716828	0.999135
226999	Slc9a2	solute carrier family 9 (sodium/hydrogen exchanger), member 2	ENSMUSG00000026062	616.639	-0.0427053	0.0505914	-0.844121	0.398602	0.999135
66297	Pantr1	POU domain, class 3, transcription factor 3 adjacent noncoding transcript 1	ENSMUSG00000060424	455.994	0.0536691	0.0505481	1.06174	0.288352	0.999135
18993	Pou3f3	POU domain, class 3, transcription factor 3	ENSMUSG00000045515	1961.01	0.0186799	0.0394086	0.474004	0.635497	0.999135
69527	Mrps9	mitochondrial ribosomal protein S9	ENSMUSG00000060679	623.361	0.0323908	0.0493577	0.656245	0.511666	0.999135
93690	Gpr45	G protein-coupled receptor 45	ENSMUSG00000041907	341.158	0.0546782	0.0505948	1.08071	0.279828	0.999135
73122	Tgfbrap1	transforming growth factor, beta receptor associated protein 1	ENSMUSG00000070939	1804.66	0.00784114	0.0404933	0.19364	0.846458	0.999135
98404	AI597479	expressed sequence AI597479	ENSMUSG00000010290	674.326	-0.00759869	0.0496202	-0.153137	0.87829	0.999135
14200	Fhl2	four and a half LIM domains 2	ENSMUSG00000008136	1112.12	0.00514089	0.0457058	0.112478	0.910444	0.999135
17974	Nck2	non-catalytic region of tyrosine kinase adaptor protein 2	ENSMUSG00000066877	1388.82	-0.0114144	0.045586	-0.250393	0.802283	0.999135
67883	Uxs1	UDP-glucuronate decarboxylase 1	ENSMUSG00000057363	854.487	0.0404517	0.0474136	0.853165	0.393568	0.999135
246229	Bivm	basic, immunoglobulin-like variable motif containing	ENSMUSG00000041684	683.471	-0.0307099	0.0498995	-0.615434	0.538268	0.999135
73674	Wdr75	WD repeat domain 75	ENSMUSG00000025995	703.453	0.0373609	0.0483662	0.77246	0.439842	0.999135
227059	Slc39a10	solute carrier family 39 (zinc transporter), member 10	ENSMUSG00000025986	4560.63	0.0319956	0.0340496	0.939675	0.347384	0.999135
56363	Tmeff2	transmembrane protein with EGF-like and two follistatin-like domains 2	ENSMUSG00000026109	1644.57	-0.000565648	0.0415549	-0.0136121	0.989139	0.999135
109019	Nabp1	nucleic acid binding protein 1	ENSMUSG00000026107	460.725	0.0337482	0.050599	0.666973	0.504789	0.999135
14660	Gls	glutaminase	ENSMUSG00000026103	14875.4	0.0197222	0.0305009	0.646609	0.517885	0.999135
17936	Nab1	Ngfi-A binding protein 1	ENSMUSG00000002881	594.884	0.0247119	0.0495147	0.499083	0.617721	0.999135
98682	Mfsd6	major facilitator superfamily domain containing 6	ENSMUSG00000041439	3884.2	-0.00637772	0.0338382	-0.188477	0.850503	0.999135
329152	Hecw2	HECT, C2 and WW domain containing E3 ubiquitin protein ligase 2	ENSMUSG00000042807	1050.67	0.0501264	0.0471718	1.06263	0.287948	0.999135
98488	Gtf3c3	general transcription factor IIIC, polypeptide 3	ENSMUSG00000041303	1192.22	-0.0130194	0.0455717	-0.285691	0.775115	0.999135
81898	Sf3b1	splicing factor 3b, subunit 1	ENSMUSG00000025982	4452.66	-0.0419267	0.0384579	-1.0902	0.275626	0.999135
67876	Coq10b	coenzyme Q10B	ENSMUSG00000025981	505.007	-0.000882754	0.0501759	-0.0175932	0.985963	0.999135
15528	Hspe1	heat shock protein 1 (chaperonin 10)	ENSMUSG00000073676	799.16	-0.0236536	0.0472699	-0.500395	0.616797	0.999135
19070	Mob4	MOB family member 4, phocein	ENSMUSG00000025979	2323.72	-0.00541012	0.038218	-0.141559	0.887428	0.999135
212679	Mars2	methionine-tRNA synthetase 2 (mitochondrial)	ENSMUSG00000046994	630.913	-0.033795	0.049605	-0.681282	0.495693	0.999135
227120	Plcl1	phospholipase C-like 1	ENSMUSG00000038349	664.767	-0.0670004	0.049164	-1.36279	0.172948	0.999135
73467	1700066M21Rik	RIKEN cDNA 1700066M21 gene	ENSMUSG00000038323	524.327	-0.0523566	0.0504558	-1.03767	0.299423	0.999135
68115	Maip1	matrix AAA peptidase interacting protein 1	ENSMUSG00000025971	352.668	0.00803518	0.0505959	0.158811	0.873818	0.999135
67198	Spats2l	spermatogenesis associated, serine-rich 2-like	ENSMUSG00000038305	614.66	0.0280084	0.0491925	0.569363	0.56911	0.999135
66882	Bzw1	basic leucine zipper and W2 domains 1	ENSMUSG00000051223	6890.59	-0.0169929	0.0303434	-0.56002	0.575465	0.999135
12747	Clk1	CDC-like kinase 1	ENSMUSG00000026034	514.677	-0.0502554	0.0505994	-0.993201	0.320612	0.999135
65102	Nif3l1	Ngg1 interacting factor 3-like 1 (S. pombe)	ENSMUSG00000026036	647.612	0.0182974	0.0490379	0.373127	0.709054	0.999135
18393	Orc2	origin recognition complex, subunit 2	ENSMUSG00000026037	616.788	-0.00312722	0.0496567	-0.0629769	0.949785	0.999135
213056	Fam126b	family with sequence similarity 126, member B	ENSMUSG00000038174	3148.77	-0.0272857	0.0389734	-0.70011	0.483859	0.999135
66495	Ndufb3	NADH dehydrogenase (ubiquinone) 1 beta subcomplex 3	ENSMUSG00000026032	946.666	-0.0398711	0.0470981	-0.846554	0.397244	0.999135
227154	Stradb	STE20-related kinase adaptor beta	ENSMUSG00000026027	638.362	0.0165331	0.048933	0.337871	0.73546	0.999135
381259	Tmem237	transmembrane protein 237	ENSMUSG00000038079	499.851	-0.00740772	0.0502133	-0.147525	0.882718	0.999135
74018	Als2	alsin Rho guanine nucleotide exchange factor	ENSMUSG00000026024	2277.92	-0.0300955	0.0389784	-0.772105	0.440052	0.999135
22218	Sumo1	small ubiquitin-like modifier 1	ENSMUSG00000026021	1156.46	0.0292083	0.0445181	0.6561	0.51176	0.999135
55989	Nop58	NOP58 ribonucleoprotein	ENSMUSG00000026020	918.59	0.00198317	0.0467205	0.0424476	0.966142	0.999135
12168	Bmpr2	bone morphogenetic protein receptor, type II (serine/threonine kinase)	ENSMUSG00000067336	6309.42	0.0195911	0.032854	0.596308	0.550969	0.999135
72750	Fam117b	family with sequence similarity 117, member B	ENSMUSG00000041040	2437.97	-0.0045134	0.0383463	-0.117701	0.906304	0.999135
70375	Ica1l	islet cell autoantigen 1-like	ENSMUSG00000026018	931.835	-0.0132762	0.0469131	-0.282996	0.77718	0.999135
57750	Wdr12	WD repeat domain 12	ENSMUSG00000026019	982.869	0.0289601	0.0457197	0.633427	0.526455	0.999135
329165	Abi2	abl-interactor 2	ENSMUSG00000026782	6827.51	0.00742409	0.0370776	0.200231	0.8413	0.999135
77300	Raph1	Ras association (RalGDS/AF-6) and pleckstrin homology domains 1	ENSMUSG00000026014	2450.87	0.0250432	0.0400715	0.624964	0.531994	0.999135
227195	Ino80d	INO80 complex subunit D	ENSMUSG00000040865	768.046	0.02852	0.0486318	0.586446	0.557576	0.999135
227197	Ndufs1	NADH dehydrogenase (ubiquinone) Fe-S protein 1	ENSMUSG00000025968	5163.66	0.0011678	0.0329988	0.0353891	0.971769	0.999135
55949	Eef1b2	eukaryotic translation elongation factor 1 beta 2	ENSMUSG00000025967	1389.47	-0.0244324	0.042528	-0.574502	0.565628	0.999135
73884	Zdbf2	zinc finger, DBF-type containing 2	ENSMUSG00000027520	1056.87	-0.0195836	0.0469458	-0.417152	0.676567	0.999135
23792	Adam23	a disintegrin and metallopeptidase domain 23	ENSMUSG00000025964	6622.48	-0.0259348	0.0347117	-0.747149	0.454974	0.999135
93691	Klf7	Kruppel-like factor 7 (ubiquitous)	ENSMUSG00000025959	2250.67	-0.0304464	0.0412175	-0.738676	0.460104	0.999135
12912	Creb1	cAMP responsive element binding protein 1	ENSMUSG00000025958	1277.27	-0.0168596	0.0457267	-0.368704	0.712348	0.999135
241075	Plekhm3	pleckstrin homology domain containing, family M, member 3	ENSMUSG00000051344	1460.83	-0.0018046	0.0427932	-0.0421702	0.966363	0.999135
15926	Idh1	isocitrate dehydrogenase 1 (NADP+), soluble	ENSMUSG00000025950	1407.12	0.0117517	0.0464436	0.253032	0.800244	0.999135
18711	Pikfyve	phosphoinositide kinase, FYVE type zinc finger containing	ENSMUSG00000025949	1442.16	-0.0156757	0.0430087	-0.364477	0.715502	0.999135
17756	Map2	microtubule-associated protein 2	ENSMUSG00000015222	24752.6	0.0208802	0.0277535	0.752343	0.451845	0.999135
66646	Rpe	ribulose-5-phosphate-3-epimerase	ENSMUSG00000026005	495.398	0.0114373	0.0503302	0.227246	0.820232	0.999135
14768	Lancl1	LanC (bacterial lantibiotic synthetase component C)-like 1	ENSMUSG00000026000	3810.84	-0.055178	0.0363099	-1.51964	0.128601	0.999135
320460	Vwc2l	von Willebrand factor C domain-containing protein 2-like	ENSMUSG00000045648	345.706	0.0177703	0.0380864	0.466579	0.640801	0.999135
108147	Atic	5-aminoimidazole-4-carboxamide ribonucleotide formyltransferase/IMP cyclohydrolase	ENSMUSG00000026192	873.964	-0.0102592	0.0471529	-0.217572	0.827762	0.999135
14268	Fn1	fibronectin 1	ENSMUSG00000026193	495.757	0.0484389	0.0505923	0.957436	0.338347	0.999135
271711	Tmem169	transmembrane protein 169	ENSMUSG00000026188	882.645	0.0385002	0.0481052	0.800332	0.423518	0.999135
381270	2022-03-04	membrane-associated ring finger (C3HC4) 4	ENSMUSG00000039372	1178.23	0.0261331	0.0455149	0.574166	0.565855	0.999135
19981	Rpl37a	ribosomal protein L37a	ENSMUSG00000046330	561.984	-0.00323096	0.0503271	-0.0641992	0.948812	0.999135
21961	Tns1	tensin 1	ENSMUSG00000055322	391.284	0.0379527	0.0505973	0.750093	0.453199	0.999135
76709	Arpc2	actin related protein 2/3 complex, subunit 2	ENSMUSG00000006304	8326.29	0.0144603	0.0405192	0.356874	0.721186	0.999135
227290	Aamp	angio-associated migratory protein	ENSMUSG00000006299	3889.89	-0.0229959	0.0352178	-0.652961	0.513781	0.999135
319651	Usp37	ubiquitin specific peptidase 37	ENSMUSG00000033364	629.003	-0.0352705	0.0490257	-0.719428	0.471877	0.999135
58184	Cnot9	CCR4-NOT transcription complex, subunit 9	ENSMUSG00000026174	1004.91	0.00416393	0.0453137	0.0918911	0.926785	0.999135
77264	Zfp142	zinc finger protein 142	ENSMUSG00000026135	881.274	0.00170664	0.0470584	0.0362665	0.97107	0.999135
66821	Bcs1l	BCS1-like (yeast)	ENSMUSG00000026172	397.291	0.0203409	0.0505925	0.402054	0.687644	0.999135
57751	Rnf25	ring finger protein 25	ENSMUSG00000026171	605.5	0.0178457	0.0500173	0.356791	0.721248	0.999135
67534	Ttll4	tubulin tyrosine ligase-like family, member 4	ENSMUSG00000033257	344.838	-0.00426423	0.0505429	-0.0843686	0.932763	0.999135
69171	Cnppd1	cyclin Pas1/PHO80 domain containing 1	ENSMUSG00000033159	571.68	-0.0252198	0.0497507	-0.506923	0.612209	0.999135
227298	Retreg2	reticulophagy regulator family member 2	ENSMUSG00000049339	4456.07	-0.043565	0.0370638	-1.1754	0.239833	0.999135
245860	Atg9a	autophagy related 9A	ENSMUSG00000033124	3125.58	0.00178899	0.0355042	0.0503881	0.959813	0.999135
20872	Stk16	serine/threonine kinase 16	ENSMUSG00000026201	640.613	-0.0287477	0.0495637	-0.580014	0.561905	0.999135
22145	Tuba4a	tubulin, alpha 4A	ENSMUSG00000026202	24270	-0.026161	0.0267526	-0.977889	0.328129	0.999135
56812	Dnajb2	DnaJ heat shock protein family (Hsp40) member B2	ENSMUSG00000026203	1029.33	0.0171984	0.0463812	0.370805	0.710783	0.999135
19711	Resp18	regulated endocrine-specific protein 18	ENSMUSG00000033061	685.148	0.00202354	0.0499017	0.0405505	0.967654	0.999135
13437	Dnpep	aspartyl aminopeptidase	ENSMUSG00000026209	606.005	0.040655	0.0491292	0.827513	0.407946	0.999135
11790	Speg	SPEG complex locus	ENSMUSG00000026207	5232.39	0.0137463	0.032036	0.429089	0.667859	0.999135
69080	Gmppa	GDP-mannose pyrophosphorylase A	ENSMUSG00000033021	761.882	-0.00333798	0.0481023	-0.0693933	0.944677	0.999135
74241	Chpf	chondroitin polymerizing factor	ENSMUSG00000032997	3361.55	0.0231327	0.0349466	0.661945	0.508007	0.999135
71728	Stk11ip	serine/threonine kinase 11 interacting protein	ENSMUSG00000026213	950.211	-0.032135	0.046481	-0.691357	0.489341	0.999135
20536	Slc4a3	solute carrier family 4 (anion exchanger), member 3	ENSMUSG00000006576	3394.25	0.043327	0.0363773	1.19105	0.233636	0.999135
74205	Acsl3	acyl-CoA synthetase long-chain family member 3	ENSMUSG00000032883	2795.22	0.0144739	0.0376881	0.384044	0.700946	0.999135
20254	Scg2	secretogranin II	ENSMUSG00000050711	9075.14	0.0251556	0.0346055	0.726926	0.467271	0.999135
69163	Mrpl44	mitochondrial ribosomal protein L44	ENSMUSG00000026248	494.959	-0.0679798	0.0504031	-1.34872	0.177426	0.999135
26554	Cul3	cullin 3	ENSMUSG00000004364	4588.3	0.0316889	0.0333192	0.951071	0.341568	0.999135
241134	Nyap2	neuronal tyrosine-phophorylated phosphoinositide 3-kinase adaptor 2	ENSMUSG00000054976	1198.49	0.0231959	0.0440877	0.52613	0.598798	0.999135
16367	Irs1	insulin receptor substrate 1	ENSMUSG00000055980	848.678	-0.00616079	0.0478786	-0.128675	0.897614	0.999135
75734	Mff	mitochondrial fission factor	ENSMUSG00000026150	3747.04	0.00821828	0.0361144	0.227563	0.819986	0.999135
15463	Agfg1	ArfGAP with FG repeats 1	ENSMUSG00000026159	4003.46	-0.0186329	0.0357262	-0.521548	0.601985	0.999135
77629	Sphkap	SPHK1 interactor, AKAP domain containing	ENSMUSG00000026163	7631.13	0.0255227	0.0502429	0.507988	0.611462	0.999135
98496	Pid1	phosphotyrosine interaction domain containing 1	ENSMUSG00000045658	987.968	0.011805	0.0471007	0.250634	0.802097	0.999135
14897	Trip12	thyroid hormone receptor interactor 12	ENSMUSG00000026219	3204.13	0.0375421	0.0351748	1.0673	0.285836	0.999135
71781	Slc16a14	solute carrier family 16 (monocarboxylic acid transporters), member 14	ENSMUSG00000026220	471.342	-0.0741505	0.0505778	-1.46607	0.14263	0.999135
12283	Cab39	calcium binding protein 39	ENSMUSG00000036707	4977.36	0.0160439	0.0329641	0.486708	0.626466	0.999135
64294	Itm2c	integral membrane protein 2C	ENSMUSG00000026223	20152.7	-0.0316678	0.0364356	-0.869146	0.384767	0.999135
70247	Psmd1	proteasome (prosome, macropain) 26S subunit, non-ATPase, 1	ENSMUSG00000026229	3607.4	-0.0407174	0.0359147	-1.13372	0.25691	0.999135
78795	Armc9	armadillo repeat containing 9	ENSMUSG00000062590	676.149	0.0353833	0.0355884	0.994237	0.320108	0.999135
17975	Ncl	nucleolin	ENSMUSG00000026234	8246.69	0.0237521	0.0287932	0.824922	0.409416	0.999135
26895	Cops7b	COP9 signalosome subunit 7B	ENSMUSG00000026240	586.6	0.00962457	0.0494579	0.194601	0.845705	0.999135
208718	Dis3l2	DIS3 like 3'-5' exoribonuclease 2	ENSMUSG00000053333	933.412	0.0169369	0.0468471	0.361536	0.717699	0.999135
26987	Eif4e2	eukaryotic translation initiation factor 4E member 2	ENSMUSG00000026254	1661.54	0.0225526	0.041532	0.543017	0.587118	0.999135
227331	Gigyf2	GRB10 interacting GYF protein 2	ENSMUSG00000048000	2271.16	-0.0156623	0.0379965	-0.412203	0.68019	0.999135
53972	Ngef	neuronal guanine nucleotide exchange factor	ENSMUSG00000026259	2742.3	0.0554197	0.042043	1.31817	0.187448	0.999135
77040	Atg16l1	autophagy related 16-like 1 (S. cerevisiae)	ENSMUSG00000026289	1318.63	-0.0345174	0.0436671	-0.790467	0.429255	0.999135
227333	Dgkd	diacylglycerol kinase, delta	ENSMUSG00000070738	4393.64	-0.028661	0.0338373	-0.847024	0.396981	0.999135
320982	Arl4c	ADP-ribosylation factor-like 4C	ENSMUSG00000049866	505.855	0.0534083	0.0504761	1.05809	0.290014	0.999135
347722	Agap1	ArfGAP with GTPase domain, ankyrin repeat and PH domain 1	ENSMUSG00000055013	3460.09	0.0382309	0.0350617	1.09039	0.275541	0.999135
108679	Cops8	COP9 signalosome subunit 8	ENSMUSG00000034432	1863.76	-0.0428674	0.0409539	-1.04672	0.295227	0.999135
16978	Lrrfip1	leucine rich repeat (in FLII) interacting protein 1	ENSMUSG00000026305	1472.08	-0.0137449	0.0418244	-0.328633	0.742433	0.999135
51801	Ramp1	receptor (calcitonin) activity modifying protein 1	ENSMUSG00000034353	770.531	0.0436827	0.0498583	0.876136	0.380956	0.999135
67921	Ube2f	ubiquitin-conjugating enzyme E2F (putative)	ENSMUSG00000034343	1129.77	-0.0296991	0.0452452	-0.656403	0.511565	0.999135
67444	Ilkap	integrin-linked kinase-associated serine/threonine phosphatase 2C	ENSMUSG00000026309	496.879	-0.015685	0.0501692	-0.312643	0.754552	0.999135
18627	Per2	period circadian clock 2	ENSMUSG00000055866	928.759	-0.0255372	0.0484394	-0.5272	0.598055	0.999135
74019	Traf3ip1	TRAF3 interacting protein 1	ENSMUSG00000034292	414.47	0.0118702	0.0505915	0.234629	0.814497	0.999135
65247	Asb1	ankyrin repeat and SOCS box-containing 1	ENSMUSG00000026311	1811.19	-0.00273076	0.04429	-0.0616562	0.950837	0.999135
67273	Ndufa10	NADH dehydrogenase (ubiquinone) 1 alpha subcomplex 10	ENSMUSG00000026260	4328.9	0.0343657	0.034281	1.00247	0.316115	0.999135
66915	Cops9	COP9 signalosome subunit 9	ENSMUSG00000073616	585.618	-0.0663854	0.0504803	-1.31508	0.188484	0.999135
108657	Rnpepl1	arginyl aminopeptidase (aminopeptidase B)-like 1	ENSMUSG00000026269	397.865	0.000594193	0.0505863	0.0117461	0.990628	0.999135
23830	Capn10	calpain 10	ENSMUSG00000026270	866.196	-0.0219374	0.0471286	-0.465481	0.641587	0.999135
16560	Kif1a	kinesin family member 1A	ENSMUSG00000014602	37914.6	0.0169492	0.0265002	0.639587	0.522441	0.999135
110611	Hdlbp	high density lipoprotein (HDL) binding protein	ENSMUSG00000034088	9234.82	0.0176949	0.0282671	0.62599	0.531321	0.999135
59041	Stk25	serine/threonine kinase 25 (yeast)	ENSMUSG00000026277	6824.16	0.0174073	0.0311219	0.559327	0.575939	0.999135
67026	Thap4	THAP domain containing 4	ENSMUSG00000026279	408.208	0.00568351	0.0504895	0.112568	0.910373	0.999135
66615	Atg4b	autophagy related 4B, cysteine peptidase	ENSMUSG00000026280	1752.49	-0.0569098	0.0415682	-1.36907	0.170978	0.999135
67698	Fam174a	family with sequence similarity 174, member A	ENSMUSG00000051185	623.872	-0.00636502	0.0498213	-0.127757	0.898341	0.999135
52392	D1Ertd622e	DNA segment, Chr 1, ERATO Doi 622, expressed	ENSMUSG00000044768	878.13	0.022763	0.0470781	0.483515	0.62873	0.999135
18484	Pam	peptidylglycine alpha-amidating monooxygenase	ENSMUSG00000026335	4809.57	-0.0292455	0.0373377	-0.78327	0.433468	0.999135
241175	Cntnap5b	contactin associated protein-like 5B	ENSMUSG00000067028	361.874	0.0256716	0.0505677	0.507669	0.611686	0.999135
227446	2310035C23Rik	RIKEN cDNA 2310035C23 gene	ENSMUSG00000026319	2392.4	-0.0482963	0.0388198	-1.24412	0.213457	0.999135
227449	Zcchc2	zinc finger, CCHC domain containing 2	ENSMUSG00000038866	1006.15	-0.00610753	0.0457321	-0.13355	0.893758	0.999135
70750	Kdsr	3-ketodihydrosphingosine reductase	ENSMUSG00000009905	726.489	0.0214444	0.048167	0.445209	0.656169	0.999135
20479	Vps4b	vacuolar protein sorting 4B	ENSMUSG00000009907	1173.9	-0.00167817	0.0459684	-0.036507	0.970878	0.999135
319901	Dsel	dermatan sulfate epimerase-like	ENSMUSG00000038702	526.615	-0.0267737	0.0503552	-0.531697	0.594936	0.999135
22099	Tsn	translin	ENSMUSG00000026374	1808.06	-0.00177002	0.0433541	-0.0408272	0.967434	0.999135
67949	Nifk	nucleolar protein interacting with the FHA domain of MKI67	ENSMUSG00000026377	908.467	-0.0193854	0.0462999	-0.418693	0.675441	0.999135
76707	Clasp1	CLIP associating protein 1	ENSMUSG00000064302	3701.78	-0.00959877	0.0402758	-0.238326	0.811628	0.999135
16324	Inhbb	inhibin beta-B	ENSMUSG00000037035	508.14	-0.0483834	0.0502503	-0.962847	0.335624	0.999135
64143	Ralb	v-ral simian leukemia viral oncogene B	ENSMUSG00000004451	377.122	0.0190467	0.0505843	0.376534	0.70652	0.999135
19258	Ptpn4	protein tyrosine phosphatase, non-receptor type 4	ENSMUSG00000026384	1404.5	-0.0364218	0.0439072	-0.829518	0.406811	0.999135
72999	Insig2	insulin induced gene 2	ENSMUSG00000003721	908.793	-0.0226682	0.0470447	-0.481845	0.629916	0.999135
70829	Ccdc93	coiled-coil domain containing 93	ENSMUSG00000026339	973.029	0.0174713	0.0464615	0.376039	0.706888	0.999135
15564	Htr5b	5-hydroxytryptamine (serotonin) receptor 5B	ENSMUSG00000050534	326.134	0.0586809	0.0502534	1.1677	0.242928	0.999135
66942	Ddx18	DEAD (Asp-Glu-Ala-Asp) box polypeptide 18	ENSMUSG00000001674	379.35	-0.0125595	0.0505705	-0.248356	0.803859	0.999135
74117	Actr3	ARP3 actin-related protein 3	ENSMUSG00000026341	7997.18	-0.0122321	0.0340706	-0.359023	0.719578	0.999135
74150	Slc35f5	solute carrier family 35, member F5	ENSMUSG00000026342	566.468	-0.0055646	0.0495778	-0.11224	0.910633	0.999135
72585	Lypd1	Ly6/Plaur domain containing 1	ENSMUSG00000026344	3660.58	0.04906	0.0410244	1.19587	0.231745	0.999135
107895	Mgat5	mannoside acetylglucosaminyltransferase 5	ENSMUSG00000036155	2630.49	0.0446472	0.0391235	1.14119	0.253792	0.999135
72949	Ccnt2	cyclin T2	ENSMUSG00000026349	1057.73	-0.00792042	0.0460283	-0.172077	0.863377	0.999135
226407	Rab3gap1	RAB3 GTPase activating protein subunit 1	ENSMUSG00000036104	3353.55	-0.00943484	0.0369419	-0.255397	0.798417	0.999135
226409	Zranb3	zinc finger, RAN-binding domain containing 3	ENSMUSG00000036086	429.682	-0.038834	0.0504724	-0.769411	0.441649	0.999135
226412	R3hdm1	R3H domain containing 1	ENSMUSG00000056211	6748.81	0.0424585	0.0350704	1.21066	0.226024	0.999135
67812	Ubxn4	UBX domain protein 4	ENSMUSG00000026353	2444.3	0.00525899	0.0377131	0.139447	0.889097	0.999135
226413	Lct	lactase	ENSMUSG00000026354	1330.22	0.0141481	0.0488296	0.289744	0.772012	0.999135
226414	Dars	aspartyl-tRNA synthetase	ENSMUSG00000026356	1709.4	-0.030344	0.0418269	-0.725467	0.468166	0.999135
210417	Thsd7b	thrombospondin, type I, domain containing 7B	ENSMUSG00000042581	855.57	-0.00279825	0.0470034	-0.0595329	0.952528	0.999135
18640	Pfkfb2	6-phosphofructo-2-kinase/fructose-2,6-biphosphatase 2	ENSMUSG00000026409	423.722	-0.0338493	0.0505422	-0.669723	0.503034	0.999135
226418	Yod1	YOD1 deubiquitinase	ENSMUSG00000046404	450.026	-0.00994851	0.0505723	-0.196718	0.844048	0.999135
17164	Mapkapk2	MAP kinase-activated protein kinase 2	ENSMUSG00000016528	535.938	-0.00781148	0.050064	-0.15603	0.876009	0.999135
226419	Dyrk3	dual-specificity tyrosine-(Y)-phosphorylation regulated kinase 3	ENSMUSG00000016526	611.587	-0.0166676	0.0500467	-0.333041	0.739103	0.999135
54354	Rassf5	Ras association (RalGDS/AF-6) domain family member 5	ENSMUSG00000026430	894.202	0.00850574	0.0479952	0.177221	0.859335	0.999135
14270	Srgap2	SLIT-ROBO Rho GTPase activating protein 2	ENSMUSG00000026425	3745.61	0.00177235	0.0349026	0.0507798	0.959501	0.999135
98396	Slc41a1	solute carrier family 41, member 1	ENSMUSG00000013275	2078.74	-0.0221122	0.0457677	-0.483139	0.628997	0.999135
98415	Nucks1	nuclear casein kinase and cyclin-dependent kinase substrate 1	ENSMUSG00000026434	3921.35	0.0156528	0.0341846	0.457891	0.647031	0.999135
13714	Elk4	ELK4, member of ETS oncogene family	ENSMUSG00000026436	392.239	0.060245	0.0505897	1.19085	0.233711	0.999135
213006	Mfsd4a	major facilitator superfamily domain containing 4A	ENSMUSG00000059149	1574.72	0.0356468	0.0430266	0.828482	0.407398	0.999135
18557	Cdk18	cyclin-dependent kinase 18	ENSMUSG00000026437	529.456	0.0394662	0.0504925	0.781625	0.434435	0.999135
68875	Tmcc2	transmembrane and coiled-coil domains 2	ENSMUSG00000042066	5041.18	-0.0390929	0.0326404	-1.19769	0.231039	0.999135
213452	Dstyk	dual serine/threonine and tyrosine protein kinase	ENSMUSG00000042046	1816.98	-0.033087	0.0430549	-0.768483	0.4422	0.999135
213464	Rbbp5	retinoblastoma binding protein 5, histone lysine methyltransferase complex subunit	ENSMUSG00000026439	1252.94	-0.049834	0.0458524	-1.08684	0.277109	0.999135
21367	Cntn2	contactin 2	ENSMUSG00000053024	2019.42	0.0175189	0.0400751	0.437153	0.662	0.999135
269116	Nfasc	neurofascin	ENSMUSG00000026442	8341.34	0.0460306	0.0343928	1.33838	0.180773	0.999135
16980	Lrrn2	leucine rich repeat protein 2, neuronal	ENSMUSG00000026443	11229.2	0.0107673	0.0312038	0.345063	0.730047	0.999135
17248	Mdm4	transformed mouse 3T3 cell double minute 4	ENSMUSG00000054387	1225.36	0.0161217	0.044649	0.361076	0.718043	0.999135
240752	Pik3c2b	phosphatidylinositol-4-phosphate 3-kinase catalytic subunit type 2 beta	ENSMUSG00000026447	542.918	0.0468231	0.050313	0.930636	0.352042	0.999135
108954	Ppp1r15b	protein phosphatase 1, regulatory (inhibitor) subunit 15b	ENSMUSG00000046062	1510.63	0.0115197	0.0421929	0.273024	0.784835	0.999135
240753	Plekha6	pleckstrin homology domain containing, family A member 6	ENSMUSG00000041757	1949.4	-0.00218085	0.0440534	-0.0495046	0.960517	0.999135
381290	Atp2b4	ATPase, Ca++ transporting, plasma membrane 4	ENSMUSG00000026463	4453.31	0.027031	0.0475276	0.568743	0.569531	0.999135
11539	Adora1	adenosine A1 receptor	ENSMUSG00000042429	14537	-0.0291387	0.0262499	-1.11005	0.266977	0.999135
57439	Tmem183a	transmembrane protein 183A	ENSMUSG00000042305	1517.96	0.0292008	0.0430757	0.677895	0.497838	0.999135
72017	Cyb5r1	cytochrome b5 reductase 1	ENSMUSG00000026456	622.83	0.0134319	0.0496584	0.270485	0.786787	0.999135
72674	Adipor1	adiponectin receptor 1	ENSMUSG00000026457	1345.27	-0.00251372	0.0464707	-0.0540926	0.956861	0.999135
98710	Rabif	RAB interacting factor	ENSMUSG00000042229	831.5	-0.00233682	0.0492412	-0.0474566	0.962149	0.999135
75605	Kdm5b	lysine (K)-specific demethylase 5B	ENSMUSG00000042207	2393.48	-0.0372123	0.0401079	-0.927806	0.353508	0.999135
329251	Ppp1r12b	protein phosphatase 1, regulatory (inhibitor) subunit 12B	ENSMUSG00000073557	5951.03	-0.0119887	0.0365603	-0.327915	0.742976	0.999135
68724	Arl8a	ADP-ribosylation factor-like 8A	ENSMUSG00000026426	5930.98	0.0415474	0.0370198	1.1223	0.261734	0.999135
215615	Rnpep	arginyl aminopeptidase (aminopeptidase B)	ENSMUSG00000041926	946.01	-0.0677057	0.0481103	-1.4073	0.159338	0.999135
21854	Timm17a	translocase of inner mitochondrial membrane 17a	ENSMUSG00000062580	1612.86	0.00827148	0.0437118	0.189227	0.849915	0.999135
77552	Shisa4	shisa family member 4	ENSMUSG00000041889	1707.73	-0.0599342	0.0471731	-1.27051	0.203901	0.999135
226432	Ipo9	importin 9	ENSMUSG00000041879	4003	-0.0165362	0.0409772	-0.403546	0.686547	0.999135
215690	Nav1	neuron navigator 1	ENSMUSG00000009418	10767.2	0.0268442	0.0493371	0.544098	0.586374	0.999135
66241	Tmem9	transmembrane protein 9	ENSMUSG00000026411	1598.74	-0.0586894	0.0421564	-1.39218	0.163867	0.999135
16565	Kif21b	kinesin family member 21B	ENSMUSG00000041642	6543.86	0.0151981	0.0364223	0.417275	0.676477	0.999135
67886	Camsap2	calmodulin regulated spectrin-associated protein family, member 2	ENSMUSG00000041570	7884.36	-0.00248034	0.0291512	-0.0850854	0.932193	0.999135
226442	Zfp281	zinc finger protein 281	ENSMUSG00000041483	1363.08	-0.0156932	0.0428637	-0.366118	0.714277	0.999135
16876	Lhx9	LIM homeobox protein 9	ENSMUSG00000019230	652.318	0.0386471	0.049096	0.787174	0.43118	0.999135
226470	Zbtb41	zinc finger and BTB domain containing 41	ENSMUSG00000033964	468.451	-0.0423662	0.0502433	-0.843221	0.399105	0.999135
240776	Kcnt2	potassium channel, subfamily T, member 2	ENSMUSG00000052726	912.502	-0.0718718	0.0478619	-1.50165	0.133188	0.999135
214498	Cdc73	cell division cycle 73, Paf1/RNA polymerase II complex component	ENSMUSG00000026361	1138.73	0.0191927	0.0460204	0.417048	0.676643	0.999135
26878	B3galt2	UDP-Gal:betaGlcNAc beta 1,3-galactosyltransferase, polypeptide 2	ENSMUSG00000033849	1910.11	0.030711	0.0444914	0.69027	0.490025	0.999135
69367	Glrx2	glutaredoxin 2 (thioltransferase)	ENSMUSG00000018196	1039.39	0.0308207	0.0492342	0.626001	0.531314	0.999135
20822	Trove2	TROVE domain family, member 2	ENSMUSG00000018199	1662.47	-0.0276298	0.043337	-0.637557	0.523762	0.999135
56207	Uchl5	ubiquitin carboxyl-terminal esterase L5	ENSMUSG00000018189	801.167	0.0315988	0.0474142	0.666443	0.505128	0.999135
19735	Rgs2	regulator of G-protein signaling 2	ENSMUSG00000026360	668.106	0.00562429	0.0499702	0.112553	0.910385	0.999135
108989	Tpr	translocated promoter region, nuclear basket protein	ENSMUSG00000006005	2312.41	0.00245567	0.0417309	0.0588455	0.953075	0.999135
117198	Ivns1abp	influenza virus NS1A binding protein	ENSMUSG00000023150	1741.95	0.0375066	0.0424417	0.883721	0.376847	0.999135
98685	Trmt1l	tRNA methyltransferase 1 like	ENSMUSG00000053286	831.469	0.000590184	0.0487352	0.01211	0.990338	0.999135
19821	Rnf2	ring finger protein 2	ENSMUSG00000026484	1184.95	-0.0314772	0.0462482	-0.680614	0.496116	0.999135
69399	1700025G04Rik	RIKEN cDNA 1700025G04 gene	ENSMUSG00000032666	1963.03	0.0475916	0.0438168	1.08615	0.277413	0.999135
19731	Rgl1	ral guanine nucleotide dissociation stimulator,-like 1	ENSMUSG00000026482	3397.33	0.0508724	0.038796	1.31128	0.189763	0.999135
67771	Arpc5	actin related protein 2/3 complex, subunit 5	ENSMUSG00000008475	5653.3	-0.0153223	0.0343402	-0.44619	0.65546	0.999135
226517	Smg7	Smg-7 homolog, nonsense mediated mRNA decay factor (C. elegans)	ENSMUSG00000042772	3588.88	-0.00496631	0.0367885	-0.134996	0.892615	0.999135
226518	Nmnat2	nicotinamide nucleotide adenylyltransferase 2	ENSMUSG00000042751	5163.56	0.0256119	0.0325874	0.785945	0.4319	0.999135
226519	Lamc1	laminin, gamma 1	ENSMUSG00000026478	518.37	-0.0612346	0.0505068	-1.2124	0.225358	0.999135
13211	Dhx9	DEAH (Asp-Glu-Ala-His) box polypeptide 9	ENSMUSG00000042699	5183.14	-0.0237431	0.0334611	-0.709573	0.477969	0.999135
67792	Rgs8	regulator of G-protein signaling 8	ENSMUSG00000042671	1821.34	-0.065854	0.0455452	-1.44591	0.148204	0.999135
14645	Glul	glutamate-ammonia ligase (glutamine synthetase)	ENSMUSG00000026473	2953.19	0.0252123	0.0431653	0.584089	0.55916	0.999135
12290	Cacna1e	calcium channel, voltage-dependent, R type, alpha 1E subunit	ENSMUSG00000004110	10847.5	0.0167681	0.035626	0.470671	0.637876	0.999135
58244	Stx6	syntaxin 6	ENSMUSG00000026470	1853.99	-0.0183501	0.0401122	-0.457471	0.647333	0.999135
19775	Xpr1	xenotropic and polytropic retrovirus receptor 1	ENSMUSG00000026469	2852.59	0.0427112	0.0396507	1.07719	0.281396	0.999135
72482	Acbd6	acyl-Coenzyme A binding domain containing 6	ENSMUSG00000033701	1031.18	0.0032679	0.0456684	0.0715571	0.942954	0.999135
104009	Qsox1	quiescin Q6 sulfhydryl oxidase 1	ENSMUSG00000033684	626.977	-0.0383185	0.0494316	-0.775182	0.438232	0.999135
208263	Tor1aip1	torsin A interacting protein 1	ENSMUSG00000026466	370.81	0.00579238	0.0505843	0.11451	0.908834	0.999135
240832	Tor1aip2	torsin A interacting protein 2	ENSMUSG00000050565	1034.2	0.0138387	0.0474584	0.291597	0.770595	0.999135
20652	Soat1	sterol O-acyltransferase 1	ENSMUSG00000026600	394.193	0.0055623	0.0504789	0.11019	0.912258	0.999135
11352	Abl2	v-abl Abelson murine leukemia viral oncogene 2 (arg, Abelson-related gene)	ENSMUSG00000026596	3299.52	0.0053769	0.0400194	0.134357	0.89312	0.999135
215015	Fam20b	family with sequence similarity 20, member B	ENSMUSG00000033557	2499.28	0.0547449	0.0443895	1.23329	0.217469	0.999135
78255	Ralgps2	Ral GEF with PH domain and SH3 binding motif 2	ENSMUSG00000026594	2321.71	0.0180754	0.0408732	0.442232	0.658321	0.999135
226525	Rasal2	RAS protein activator like 2	ENSMUSG00000070565	2525.19	0.0576229	0.0377239	1.52749	0.126638	0.999135
240843	Brinp2	bone morphogenic protein/retinoic acid inducible neural-specific 2	ENSMUSG00000004031	5056.53	0.00222343	0.0344884	0.0644691	0.948597	0.999135
11899	Astn1	astrotactin 1	ENSMUSG00000026587	10878.6	0.0290849	0.0284383	1.02274	0.306432	0.999135
26374	Rfwd2	ring finger and WD repeat domain 2	ENSMUSG00000040782	1127.9	0.00218386	0.0471035	0.0463631	0.963021	0.999135
21960	Tnr	tenascin R	ENSMUSG00000015829	5471.89	-0.00660753	0.0393509	-0.167913	0.866652	0.999135
64659	Mrps14	mitochondrial ribosomal protein S14	ENSMUSG00000058267	426.026	-0.0597185	0.0505939	-1.18035	0.237861	0.999135
12301	Cacybp	calcyclin binding protein	ENSMUSG00000014226	1813.56	0.0257518	0.0407707	0.631626	0.527631	0.999135
29809	Rabgap1l	RAB GTPase activating protein 1-like	ENSMUSG00000026721	6352.39	-0.0209844	0.0309277	-0.678498	0.497456	0.999135
381305	Rc3h1	RING CCCH (C3H) domains 1	ENSMUSG00000040423	1091.79	0.0359599	0.0458281	0.78467	0.432647	0.999135
226539	Dars2	aspartyl-tRNA synthetase 2 (mitochondrial)	ENSMUSG00000026709	632.321	-0.0360747	0.0491994	-0.733234	0.463416	0.999135
226541	Klhl20	kelch-like 20	ENSMUSG00000026705	631.856	-0.0164852	0.0490545	-0.336059	0.736827	0.999135
73844	Ankrd45	ankyrin repeat domain 45	ENSMUSG00000044835	632.99	-0.0125463	0.0493017	-0.254481	0.799124	0.999135
11758	Prdx6	peroxiredoxin 6	ENSMUSG00000026701	1042.43	0.00475675	0.0454444	0.104672	0.916636	0.999135
226551	Suco	SUN domain containing ossification factor	ENSMUSG00000040297	686.148	-0.0416335	0.0485616	-0.857335	0.39126	0.999135
103967	Dnm3	dynamin 3	ENSMUSG00000040265	2675.7	0.0375171	0.042548	0.881759	0.377907	0.999135
71449	Mettl13	methyltransferase like 13	ENSMUSG00000026694	408.51	-0.0588666	0.0504663	-1.16645	0.243431	0.999135
53330	Vamp4	vesicle-associated membrane protein 4	ENSMUSG00000026696	1377.36	0.0228609	0.0454421	0.503079	0.614909	0.999135
16579	Kifap3	kinesin-associated protein 3	ENSMUSG00000026585	14024.2	-0.0169896	0.02676	-0.634887	0.525502	0.999135
240880	Scyl3	SCY1-like 3 (S. cerevisiae)	ENSMUSG00000026584	564.109	0.0205222	0.0496767	0.413114	0.679523	0.999135
74895	Ccdc181	coiled-coil domain containing 181	ENSMUSG00000026578	551.134	-0.0122263	0.0501643	-0.243725	0.807443	0.999135
66352	Blzf1	basic leucine zipper nuclear factor 1	ENSMUSG00000026577	759.029	-0.00998365	0.0479836	-0.208064	0.835179	0.999135
11931	Atp1b1	ATPase, Na+/K+ transporting, beta 1 polypeptide	ENSMUSG00000026576	63069	-0.0124299	0.0260574	-0.477019	0.633349	0.999135
226591	Tiprl	TIP41, TOR signalling pathway regulator-like (S. cerevisiae)	ENSMUSG00000040843	1504.4	-0.0120037	0.041901	-0.286477	0.774513	0.999135
240888	Gpr161	G protein-coupled receptor 161	ENSMUSG00000040836	3691.64	-0.0124416	0.0504465	-0.24663	0.805194	0.999135
74106	Dcaf6	DDB1 and CUL4 associated factor 6	ENSMUSG00000026571	3255.35	-0.00815	0.0371804	-0.219201	0.826493	0.999135
70456	Mpc2	mitochondrial pyruvate carrier 2	ENSMUSG00000026568	1250.72	-0.0300584	0.0457286	-0.657323	0.510973	0.999135
68481	Mpzl1	myelin protein zero-like 1	ENSMUSG00000026566	390.499	-0.0401121	0.0505958	-0.792795	0.427897	0.999135
100039795	Ildr2	immunoglobulin-like domain containing receptor 2	ENSMUSG00000040612	5515.83	0.0538799	0.0365081	1.47583	0.139989	0.999135
27878	Tada1	transcriptional adaptor 1	ENSMUSG00000026563	716.479	-0.0475557	0.0485484	-0.979552	0.327307	0.999135
71592	Pogk	pogo transposable element with KRAB domain	ENSMUSG00000040596	738.424	0.0199624	0.0488561	0.408596	0.682836	0.999135
226610	Fam78b	family with sequence similarity 78, member B	ENSMUSG00000060568	958.609	0.0344894	0.0467582	0.737612	0.46075	0.999135
80914	Uck2	uridine-cytidine kinase 2	ENSMUSG00000026558	2737.59	0.0389902	0.0382789	1.01858	0.308402	0.999135
68944	Tmco1	transmembrane and coiled-coil domains 1	ENSMUSG00000052428	559.19	0.0207204	0.0498448	0.415697	0.677631	0.999135
18514	Pbx1	pre B cell leukemia homeobox 1	ENSMUSG00000052534	4931.48	0.0511944	0.0354046	1.44598	0.148182	0.999135
19737	Rgs5	regulator of G-protein signaling 5	ENSMUSG00000026678	1183.12	0.0178496	0.0491445	0.363207	0.71645	0.999135
15490	Hsd17b7	hydroxysteroid (17-beta) dehydrogenase 7	ENSMUSG00000026675	856.804	0.00846534	0.0475903	0.177879	0.858818	0.999135
107652	Uap1	UDP-N-acetylglucosamine pyrophosphorylase 1	ENSMUSG00000026670	1382.48	0.0516028	0.0434108	1.18871	0.234554	0.999135
70729	Nos1ap	nitric oxide synthase 1 (neuronal) adaptor protein	ENSMUSG00000038473	3895.93	-0.0434687	0.0379973	-1.14399	0.252626	0.999135
320078	Olfml2b	olfactomedin-like 2B	ENSMUSG00000038463	1752.21	-0.0490446	0.0453945	-1.08041	0.27996	0.999135
226641	Atf6	activating transcription factor 6	ENSMUSG00000026663	2754.36	-0.0462087	0.0382455	-1.20821	0.226965	0.999135
66052	Sdhc	succinate dehydrogenase complex, subunit C, integral membrane protein	ENSMUSG00000058076	1580.97	-0.0343978	0.0439923	-0.781905	0.43427	0.999135
641376	Tomm40l	translocase of outer mitochondrial membrane 40 homolog-like (yeast)	ENSMUSG00000005674	988.783	0.0286098	0.045992	0.62206	0.533903	0.999135
226646	Ndufs2	NADH dehydrogenase (ubiquinone) Fe-S protein 2	ENSMUSG00000013593	4705.22	-0.00710355	0.034358	-0.206751	0.836204	0.999135
57370	B4galt3	UDP-Gal:betaGlcNAc beta 1,4-galactosyltransferase, polypeptide 3	ENSMUSG00000052423	997.92	-0.0392052	0.0463469	-0.845908	0.397604	0.999135
30941	Usp21	ubiquitin specific peptidase 21	ENSMUSG00000053483	737.836	0.0117677	0.0500161	0.235277	0.813994	0.999135
66155	Ufc1	ubiquitin-fold modifier conjugating enzyme 1	ENSMUSG00000062963	1044.85	0.0201783	0.0454512	0.443957	0.657074	0.999135
21945	Dedd	death effector domain-containing	ENSMUSG00000013973	503.304	0.0354302	0.0499963	0.708657	0.478537	0.999135
27045	Nit1	nitrilase 1	ENSMUSG00000013997	574.885	-0.0350431	0.0500267	-0.700487	0.483623	0.999135
18637	Pfdn2	prefoldin 2	ENSMUSG00000006412	1142.44	-0.0668856	0.0454198	-1.47261	0.140857	0.999135
22278	Usf1	upstream transcription factor 1	ENSMUSG00000026641	1577.6	-0.021932	0.0431927	-0.507771	0.611614	0.999135
59287	Ncstn	nicastrin	ENSMUSG00000003458	2227.62	0.00738729	0.0391798	0.188549	0.850447	0.999135
12847	Copa	coatomer protein complex subunit alpha	ENSMUSG00000026553	6639.95	-0.0155638	0.0316471	-0.491791	0.622867	0.999135
19298	Pex19	peroxisomal biogenesis factor 19	ENSMUSG00000003464	2718.71	0.0364254	0.0363402	1.00235	0.316177	0.999135
98193	Dcaf8	DDB1 and CUL4 associated factor 8	ENSMUSG00000026554	3777.9	0.00676564	0.0352341	0.192019	0.847727	0.999135
18611	Pea15a	phosphoprotein enriched in astrocytes 15A	ENSMUSG00000013698	7743.4	-0.0258109	0.0314419	-0.820908	0.411699	0.999135
140559	Igsf8	immunoglobulin superfamily, member 8	ENSMUSG00000038034	4898.94	-0.00114193	0.0318943	-0.0358035	0.971439	0.999135
13349	Ackr1	atypical chemokine receptor 1 (Duffy blood group)	ENSMUSG00000037872	1483.96	0.0182442	0.0419425	0.434981	0.663576	0.999135
94332	Cadm3	cell adhesion molecule 3	ENSMUSG00000005338	18932.2	-0.0261008	0.0300385	-0.868911	0.384896	0.999135
54418	Fmn2	formin 2	ENSMUSG00000028354	1086.52	0.00312453	0.045746	0.0683017	0.945545	0.999135
23893	Grem2	gremlin 2, DAN family BMP antagonist	ENSMUSG00000050069	663.242	0.0507604	0.0491388	1.033	0.301604	0.999135
24012	Rgs7	regulator of G protein signaling 7	ENSMUSG00000026527	2370.8	0.0160568	0.0398042	0.403396	0.686657	0.999135
14194	Fh1	fumarate hydratase 1	ENSMUSG00000026526	2292.65	0.0377792	0.0382134	0.988636	0.322841	0.999135
12663	Chml	choroideremia-like	ENSMUSG00000078185	327.664	0.0383631	0.0503242	0.762319	0.44587	0.999135
545389	Cep170	centrosomal protein 170	ENSMUSG00000057335	3026.42	0.0193261	0.0358975	0.538369	0.590322	0.999135
30928	Zbtb18	zinc finger and BTB domain containing 18	ENSMUSG00000063659	20918.1	0.0167177	0.0266375	0.627601	0.530265	0.999135
11566	Adss	adenylosuccinate synthetase, non muscle	ENSMUSG00000015961	2334.83	-0.0278637	0.038572	-0.722383	0.470059	0.999135
78825	Desi2	desumoylating isopeptidase 2	ENSMUSG00000026502	641.217	-0.0236766	0.0496204	-0.477154	0.633253	0.999135
51810	Hnrnpu	heterogeneous nuclear ribonucleoprotein U	ENSMUSG00000039630	11623.3	-0.0343688	0.0300629	-1.14323	0.252943	0.999135
269152	Kif26b	kinesin family member 26B	ENSMUSG00000026494	703.575	0.0172341	0.0495742	0.347643	0.728108	0.999135
15278	Tfb2m	transcription factor B2, mitochondrial	ENSMUSG00000026492	333.138	0.0101567	0.0502574	0.202094	0.839843	0.999135
109232	Sccpdh	saccharopine dehydrogenase (putative)	ENSMUSG00000038936	1366.35	0.0409687	0.0442494	0.92586	0.354519	0.999135
226747	Ahctf1	AT hook containing transcription factor 1	ENSMUSG00000026491	902.863	-0.0148521	0.0486268	-0.30543	0.760038	0.999135
19165	Psen2	presenilin 2	ENSMUSG00000010609	557.417	-0.0164419	0.0500215	-0.328697	0.742384	0.999135
381310	Stum	mechanosensory transduction mediator	ENSMUSG00000053963	22335.1	0.00592349	0.0337734	0.175389	0.860774	0.999135
11545	Parp1	poly (ADP-ribose) polymerase family, member 1	ENSMUSG00000026496	5817.94	-0.00168076	0.0342197	-0.0491169	0.960826	0.999135
170760	Acbd3	acyl-Coenzyme A binding domain containing 3	ENSMUSG00000026499	1001.25	-0.0279803	0.0457857	-0.611113	0.541125	0.999135
15078	H3f3a	H3 histone, family 3A	ENSMUSG00000060743	1930.36	-0.0538988	0.0417272	-1.29169	0.196463	0.999135
625328	H3f3c	H3 histone, family 3C	ENSMUSG00000060743	1930.36	-0.0538988	0.0417272	-1.29169	0.196463	0.999135
667250	Gm12657	predicted gene 12657	ENSMUSG00000060743	1930.36	-0.0538988	0.0417272	-1.29169	0.196463	0.999135
208768	Sde2	SDE2 telomere maintenance homolog (S. pombe)	ENSMUSG00000038806	771.968	-0.0172387	0.0487975	-0.35327	0.723886	0.999135
69051	Pycr2	pyrroline-5-carboxylate reductase family, member 2	ENSMUSG00000026520	918.248	-0.0667092	0.0465743	-1.43232	0.152053	0.999135
13849	Ephx1	epoxide hydrolase 1, microsomal	ENSMUSG00000038776	522.096	0.0235602	0.050218	0.469159	0.638956	0.999135
67459	Nvl	nuclear VCP-like	ENSMUSG00000026516	909.599	-0.0306211	0.0474743	-0.645004	0.518925	0.999135
98417	Cnih4	cornichon family AMPA receptor auxiliary protein 4	ENSMUSG00000062169	397.842	-0.0368998	0.0505986	-0.729265	0.46584	0.999135
226757	Wdr26	WD repeat domain 26	ENSMUSG00000038733	5034.02	0.0140431	0.0332441	0.422423	0.672717	0.999135
72978	Cnih3	cornichon family AMPA receptor auxiliary protein 3	ENSMUSG00000026514	1443.49	0.0176274	0.0436666	0.403683	0.686446	0.999135
13800	Enah	ENAH actin regulator	ENSMUSG00000022995	4759.59	0.0245219	0.0336231	0.729317	0.465808	0.999135
27058	Srp9	signal recognition particle 9	ENSMUSG00000026511	898.529	-0.000683044	0.047872	-0.0142681	0.988616	0.999135
13244	Degs1	delta(4)-desaturase, sphingolipid 1	ENSMUSG00000038633	1781.81	-0.0442	0.0402444	-1.09829	0.272078	0.999135
67948	Fbxo28	F-box protein 28	ENSMUSG00000047539	1323.15	0.0210319	0.0432591	0.486183	0.626837	0.999135
209456	Trp53bp2	transformation related protein 53 binding protein 2	ENSMUSG00000026510	483.471	-0.00570445	0.0502474	-0.113527	0.909613	0.999135
12334	Capn2	calpain 2	ENSMUSG00000026509	1148.75	-0.0517336	0.0463709	-1.11565	0.264573	0.999135
96935	Susd4	sushi domain containing 4	ENSMUSG00000038576	4673.02	0.0318205	0.0321063	0.991101	0.321636	0.999135
71678	Brox	BRO1 domain and CAAX motif containing	ENSMUSG00000046836	1546.77	0.00334591	0.0415786	0.0804721	0.935862	0.999135
108909	Aida	axin interactor, dorsalization associated	ENSMUSG00000042901	631.216	0.0457056	0.0491636	0.929663	0.352546	0.999135
NA	NA	NA	ENSMUSG00000056050	2497.31	-0.0153258	0.03802	-0.403099	0.686875	0.999135
67247	2022-03-02	mitochondrial amidoxime reducing component 2	ENSMUSG00000073481	391.646	-0.0357424	0.0505412	-0.707192	0.479447	0.999135
226778	Mark1	MAP/microtubule affinity regulating kinase 1	ENSMUSG00000026620	2068.35	0.012277	0.0400799	0.306313	0.759367	0.999135
98732	Rab3gap2	RAB3 GTPase activating protein subunit 2	ENSMUSG00000039318	2585.09	-0.0347582	0.0418342	-0.830856	0.406055	0.999135
381314	Iars2	isoleucine-tRNA synthetase 2, mitochondrial	ENSMUSG00000026618	1742.6	0.00641869	0.0406264	0.157993	0.874462	0.999135
23827	Bpnt1	bisphosphate 3'-nucleotidase 1	ENSMUSG00000026617	1746.63	0.0398392	0.0414419	0.961326	0.336388	0.999135
107508	Eprs	glutamyl-prolyl-tRNA synthetase	ENSMUSG00000026615	1692.69	-0.0165085	0.041821	-0.394743	0.693033	0.999135
226781	Slc30a10	solute carrier family 30, member 10	ENSMUSG00000026614	539.971	-0.0157572	0.0502021	-0.313876	0.753616	0.999135
67769	Gpatch2	G patch domain containing 2	ENSMUSG00000039210	609.873	0.0281937	0.0494681	0.569938	0.56872	0.999135
226823	Kctd3	potassium channel tetramerisation domain containing 3	ENSMUSG00000026608	3982.63	-0.0419078	0.0341518	-1.2271	0.219784	0.999135
16526	Kcnk2	potassium channel, subfamily K, member 2	ENSMUSG00000037624	800.543	0.012002	0.0478932	0.2506	0.802124	0.999135
19250	Ptpn14	protein tyrosine phosphatase, non-receptor type 14	ENSMUSG00000026604	527.238	-0.00757139	0.0500983	-0.151131	0.879873	0.999135
226830	Smyd2	SET and MYND domain containing 2	ENSMUSG00000026603	1181.33	-0.0317513	0.0474335	-0.669384	0.50325	0.999135
19130	Prox1	prospero homeobox 1	ENSMUSG00000010175	1741.02	-0.0529017	0.0470118	-1.12529	0.260467	0.999135
320119	Rps6kc1	ribosomal protein S6 kinase polypeptide 1	ENSMUSG00000089872	1479.22	0.0112952	0.0425993	0.265149	0.790894	0.999135
66208	Nenf	neuron derived neurotrophic factor	ENSMUSG00000037499	370.544	0.00787814	0.0504726	0.156087	0.875964	0.999135
226849	Ppp2r5a	protein phosphatase 2, regulatory subunit B', alpha	ENSMUSG00000026626	1712.85	-0.00633363	0.0413395	-0.15321	0.878233	0.999135
77065	Ints7	integrator complex subunit 7	ENSMUSG00000037461	514.655	-0.00121863	0.0505851	-0.0240906	0.98078	0.999135
226856	Lpgat1	lysophosphatidylglycerol acyltransferase 1	ENSMUSG00000026623	5003.84	0.0426727	0.0335815	1.27072	0.203828	0.999135
22782	Slc30a1	solute carrier family 30 (zinc transporter), member 1	ENSMUSG00000037434	723.709	-0.0535743	0.0492559	-1.08767	0.27674	0.999135
214742	Rcor3	REST corepressor 3	ENSMUSG00000037395	403.274	-0.0169975	0.0505903	-0.335984	0.736883	0.999135
16510	Kcnh1	potassium voltage-gated channel, subfamily H (eag-related), member 1	ENSMUSG00000058248	1646.97	-0.0245743	0.045605	-0.538851	0.58999	0.999135
214791	Sertad4	SERTA domain containing 4	ENSMUSG00000016262	882.009	-0.0283026	0.048386	-0.584934	0.558592	0.999135
329324	Syt14	synaptotagmin XIV	ENSMUSG00000016200	602.488	0.0222187	0.0494896	0.448958	0.653462	0.999135
215193	Diexf	digestive organ expansion factor homolog (zebrafish)	ENSMUSG00000016181	482.173	-0.0062098	0.0503446	-0.123346	0.901833	0.999135
215303	Camk1g	calcium/calmodulin-dependent protein kinase I gamma	ENSMUSG00000016179	1435.47	-0.0121124	0.0431098	-0.280967	0.778735	0.999135
18845	Plxna2	plexin A2	ENSMUSG00000026640	4946.04	0.037054	0.0331154	1.11894	0.263167	0.999135
12946	Cr1l	complement component (3b/4b) receptor 1-like	ENSMUSG00000016481	377.976	0.0314153	0.0505981	0.62088	0.534679	0.999135
269233	Fam171a1	family with sequence similarity 171, member A1	ENSMUSG00000050530	2771.61	-0.0291196	0.0365879	-0.795881	0.426101	0.999135
18108	Nmt2	N-myristoyltransferase 2	ENSMUSG00000026643	2106.1	0.0295281	0.040256	0.733509	0.463248	0.999135
50497	Hspa14	heat shock protein 14	ENSMUSG00000109865	606.178	-0.0278534	0.0494542	-0.563216	0.573288	0.999135
209630	Frmd4a	FERM domain containing 4A	ENSMUSG00000026657	1969.49	0.00249359	0.0401995	0.0620305	0.950539	0.999135
67229	Prpf18	pre-mRNA processing factor 18	ENSMUSG00000039449	1277.41	-0.0230858	0.0447719	-0.515632	0.606112	0.999135
109079	Sephs1	selenophosphate synthetase 1	ENSMUSG00000026662	613.312	0.0365474	0.0496403	0.736244	0.461582	0.999135
16922	Phyh	phytanoyl-CoA hydroxylase	ENSMUSG00000026664	1256.08	-0.0540281	0.0436535	-1.23766	0.215843	0.999135
98828	Cdc123	cell division cycle 123	ENSMUSG00000039128	1080.58	0.00619372	0.0455362	0.136018	0.891807	0.999135
53893	Nudt5	nudix (nucleoside diphosphate linked moiety X)-type motif 5	ENSMUSG00000025817	398.083	-0.00845427	0.0505578	-0.16722	0.867197	0.999135
57743	Sec61a2	Sec61, alpha subunit 2 (S. cerevisiae)	ENSMUSG00000025816	1853.94	-0.0152967	0.0426014	-0.359065	0.719546	0.999135
326622	Upf2	UPF2 regulator of nonsense transcripts homolog (yeast)	ENSMUSG00000043241	1178.36	0.0176018	0.0461959	0.381026	0.703184	0.999135
14007	Celf2	CUGBP, Elav-like family member 2	ENSMUSG00000002107	18487.9	0.0130357	0.0280791	0.464248	0.64247	0.999135
209361	Taf3	TATA-box binding protein associated factor 3	ENSMUSG00000025782	472.08	-0.00516365	0.0503486	-0.102558	0.918314	0.999135
11949	Atp5c1	ATP synthase, H+ transporting, mitochondrial F1 complex, gamma polypeptide 1	ENSMUSG00000025781	5024.28	-0.00669771	0.0335822	-0.199442	0.841917	0.999135
170768	Pfkfb3	6-phosphofructo-2-kinase/fructose-2,6-biphosphatase 3	ENSMUSG00000026773	1379.92	0.0120431	0.0476786	0.252589	0.800586	0.999135
76938	Rbm17	RNA binding motif protein 17	ENSMUSG00000037197	996.514	-0.00757352	0.0465504	-0.162695	0.870759	0.999135
50755	Fbxo18	F-box protein 18	ENSMUSG00000058594	1336.62	-0.0299688	0.043005	-0.696868	0.485885	0.999135
66960	Mindy3	MINDY lysine 48 deubiquitinase 3	ENSMUSG00000026767	1452.85	0.0219746	0.0433055	0.507431	0.611852	0.999135
227580	C1ql3	C1q-like 3	ENSMUSG00000049630	2308.72	-0.0478383	0.0402749	-1.18779	0.234915	0.999135
20163	Rsu1	Ras suppressor protein 1	ENSMUSG00000026727	565.997	-0.0377599	0.0500807	-0.753981	0.450861	0.999135
20844	Stam	signal transducing adaptor molecule (SH3 domain and ITAM motif) 1	ENSMUSG00000026718	2378.81	-0.0394227	0.0387864	-1.0164	0.309437	0.999135
12296	Cacnb2	calcium channel, voltage-dependent, beta 2 subunit	ENSMUSG00000057914	2240.32	-0.0114416	0.0402866	-0.284004	0.776407	0.999135
75869	Arl5b	ADP-ribosylation factor-like 5B	ENSMUSG00000017418	1167.93	0.0109435	0.0459819	0.237996	0.811884	0.999135
67448	Plxdc2	plexin domain containing 2	ENSMUSG00000026748	417.276	0.0619167	0.0505993	1.22367	0.221078	0.999135
74103	Nebl	nebulette	ENSMUSG00000053702	2829.08	-0.0600389	0.0404199	-1.48538	0.137443	0.999135
72668	Skida1	SKI/DACH domain containing 1	ENSMUSG00000054074	494.771	-0.0219241	0.0502379	-0.436407	0.662541	0.999135
17354	Mllt10	myeloid/lymphoid or mixed-lineage leukemia; translocated to, 10	ENSMUSG00000026743	565.481	-0.0106221	0.0504043	-0.210737	0.833092	0.999135
13418	Dnajc1	DnaJ heat shock protein family (Hsp40) member C1	ENSMUSG00000026740	403.125	-0.0138777	0.050398	-0.275362	0.783038	0.999135
12238	Commd3	COMM domain containing 3	ENSMUSG00000051154	844.235	0.0151046	0.0470276	0.321185	0.74807	0.999135
12151	Bmi1	Bmi1 polycomb ring finger oncogene	ENSMUSG00000026739	628.064	-0.039568	0.0498336	-0.794001	0.427195	0.999135
18718	Pip4k2a	phosphatidylinositol-5-phosphate 4-kinase, type II, alpha	ENSMUSG00000026737	1234.32	-0.00567169	0.0470361	-0.120582	0.904022	0.999135
76467	Msrb2	methionine sulfoxide reductase B2	ENSMUSG00000023094	390.064	0.00175298	0.0505883	0.0346518	0.972357	0.999135
71198	Otud1	OTU domain containing 1	ENSMUSG00000043415	339.154	0.0194199	0.0503624	0.385602	0.699791	0.999135
208618	Etl4	enhancer trap locus 4	ENSMUSG00000036617	2398.34	-0.0149464	0.0448156	-0.333509	0.73875	0.999135
71435	Arhgap21	Rho GTPase activating protein 21	ENSMUSG00000036591	6228.75	0.041475	0.0344163	1.2051	0.228166	0.999135
208967	Thnsl1	threonine synthase-like 1 (bacterial)	ENSMUSG00000048550	667.651	-0.0536284	0.0498413	-1.07598	0.281935	0.999135
11308	Abi1	abl-interactor 1	ENSMUSG00000058835	5116.04	-0.0256571	0.0505561	-0.507497	0.611806	0.999135
27377	Yme1l1	YME1-like 1 (S. cerevisiae)	ENSMUSG00000026775	2849.77	-0.0112985	0.0364288	-0.310153	0.756445	0.999135
76857	Spopl	speckle-type POZ protein-like	ENSMUSG00000026771	368.441	0.0546155	0.050433	1.08293	0.278838	0.999135
140483	Hnmt	histamine N-methyltransferase	ENSMUSG00000026986	589.22	0.0258947	0.0499321	0.518599	0.60404	0.999135
12287	Cacna1b	calcium channel, voltage-dependent, N type, alpha 1B subunit	ENSMUSG00000004113	4487.68	-0.023718	0.0321923	-0.736761	0.461268	0.999135
67187	Zmynd19	zinc finger, MYND domain containing 19	ENSMUSG00000026974	584.565	-0.0296182	0.050067	-0.591573	0.554137	0.999135
67228	Dph7	diphthamine biosynethesis 7	ENSMUSG00000026975	354.572	0.0509045	0.0502491	1.01304	0.311039	0.999135
107733	Mrpl41	mitochondrial ribosomal protein L41	ENSMUSG00000036850	697.462	-0.0311957	0.0484267	-0.644184	0.519456	0.999135
56876	Nsmf	NMDA receptor synaptonuclear signaling and neuronal migration factor	ENSMUSG00000006476	25657.5	-0.000611194	0.0279781	-0.0218454	0.982571	0.999135
58202	Nelfb	negative elongation factor complex member B	ENSMUSG00000013465	959.841	0.0115691	0.0458463	0.252345	0.800774	0.999135
227613	Tubb4b	tubulin, beta 4B class IVB	ENSMUSG00000036752	13004.2	-0.0184825	0.028632	-0.645518	0.518592	0.999135
68846	Rnf208	ring finger protein 208	ENSMUSG00000044628	3064.16	0.00259307	0.0386221	0.0671395	0.946471	0.999135
68475	Ssna1	SS nuclear autoantigen 1	ENSMUSG00000026966	375.997	-0.0303996	0.0505877	-0.600928	0.547888	0.999135
14810	Grin1	glutamate receptor, ionotropic, NMDA1 (zeta 1)	ENSMUSG00000026959	32358.5	0.00348939	0.0288921	0.120773	0.903871	0.999135
227619	Man1b1	mannosidase, alpha, class 1B, member 1	ENSMUSG00000036646	1624.29	0.0227395	0.0412434	0.55135	0.581394	0.999135
18146	Npdc1	neural proliferation, differentiation and control 1	ENSMUSG00000015094	6768.28	-0.0297918	0.0321092	-0.927826	0.353498	0.999135
11305	Abca2	ATP-binding cassette, sub-family A (ABC1), member 2	ENSMUSG00000026944	5719.53	0.000403094	0.0319405	0.0126201	0.989931	0.999135
30839	Fbxw5	F-box and WD-40 domain protein 5	ENSMUSG00000015095	2509.29	0.00777988	0.0374381	0.207807	0.83538	0.999135
59022	Edf1	endothelial differentiation-related factor 1	ENSMUSG00000015092	2307.9	-0.00803649	0.0415014	-0.193644	0.846455	0.999135
227624	Rabl6	RAB, member RAS oncogene family-like 6	ENSMUSG00000015087	3261.92	0.0231636	0.0369317	0.627201	0.530527	0.999135
107771	Bmyc	brain expressed myelocytomatosis oncogene	ENSMUSG00000049086	993.651	-0.00304251	0.0467766	-0.0650434	0.948139	0.999135
227632	Kcnt1	potassium channel, subfamily T, member 1	ENSMUSG00000058740	871.909	-0.0189364	0.0487644	-0.388325	0.697776	0.999135
227634	Camsap1	calmodulin regulated spectrin-associated protein 1	ENSMUSG00000026933	4836.31	-0.0138603	0.0336919	-0.411386	0.68079	0.999135
98766	Ubac1	ubiquitin associated domain containing 1	ENSMUSG00000036352	1033.69	0.0640762	0.046403	1.38086	0.167321	0.999135
NA	NA	NA	ENSMUSG00000087679	967.814	0.0362235	0.0480284	0.754211	0.450723	0.999135
67839	Gpsm1	G-protein signalling modulator 1 (AGS3-like, C. elegans)	ENSMUSG00000026930	1047.12	0.00756259	0.0483162	0.156523	0.875621	0.999135
52838	Dnlz	DNL-type zinc finger	ENSMUSG00000075467	632.575	-0.070379	0.0492578	-1.42879	0.153065	0.999135
227644	Snapc4	small nuclear RNA activating complex, polypeptide 4	ENSMUSG00000036281	506.722	0.00543074	0.0504636	0.107617	0.9143	0.999135
68112	Sdccag3	serologically defined colon cancer antigen 3	ENSMUSG00000026927	1145.35	0.0558346	0.044307	1.26018	0.207606	0.999135
66865	Pmpca	peptidase (mitochondrial processing) alpha	ENSMUSG00000026926	2958.04	0.0318298	0.0365835	0.870057	0.384269	0.999135
64436	Inpp5e	inositol polyphosphate-5-phosphatase E	ENSMUSG00000026925	393.043	-0.0371393	0.0505889	-0.73414	0.462864	0.999135
227648	Sec16a	SEC16 homolog A, endoplasmic reticulum export factor	ENSMUSG00000026924	1964.02	-0.0234786	0.0397443	-0.590742	0.554693	0.999135
353156	Egfl7	EGF-like domain 7	ENSMUSG00000026921	415.368	-0.0616642	0.050591	-1.21888	0.222891	0.999135
56279	Fam69b	family with sequence similarity 69, member B	ENSMUSG00000036186	812.765	-0.0489926	0.0472881	-1.03604	0.300182	0.999135
20935	Surf6	surfeit gene 6	ENSMUSG00000036160	650.379	-0.0325817	0.0491915	-0.662344	0.507751	0.999135
20933	Med22	mediator complex subunit 22	ENSMUSG00000015776	540.053	-0.0396394	0.0502309	-0.789145	0.430028	0.999135
20931	Surf2	surfeit gene 2	ENSMUSG00000014873	432.023	0.0351483	0.0503533	0.698032	0.485157	0.999135
20932	Surf4	surfeit gene 4	ENSMUSG00000014867	1918.64	-0.0304037	0.0399668	-0.760724	0.446822	0.999135
227656	Rexo4	REX4, 3'-5' exonuclease	ENSMUSG00000052406	1032.67	0.00658587	0.0462125	0.142513	0.886675	0.999135
381356	Cacfd1	calcium channel flower domain containing 1	ENSMUSG00000015488	833.254	0.0370118	0.0472364	0.783544	0.433308	0.999135
227659	Slc2a6	solute carrier family 2 (facilitated glucose transporter), member 6	ENSMUSG00000036067	1501.83	0.00212288	0.0444017	0.0478107	0.961867	0.999135
NA	NA	NA	ENSMUSG00000109946	595.544	-0.0085021	0.0495587	-0.171556	0.863787	0.999135
67382	Brd3	bromodomain containing 3	ENSMUSG00000026918	2216.41	0.00599887	0.0390634	0.153567	0.877951	0.999135
140858	Wdr5	WD repeat domain 5	ENSMUSG00000026917	1096.37	-0.000754639	0.0446393	-0.0169053	0.986512	0.999135
20181	Rxra	retinoid X receptor alpha	ENSMUSG00000015846	482.91	0.00788322	0.0500577	0.157483	0.874864	0.999135
241289	Ppp1r26	protein phosphatase 1, regulatory subunit 26	ENSMUSG00000035829	546.086	-0.0495057	0.0501409	-0.987333	0.32348	0.999135
118451	Mrps2	mitochondrial ribosomal protein S2	ENSMUSG00000035772	763.334	0.00717952	0.0475216	0.151079	0.879913	0.999135
19730	Ralgds	ral guanine nucleotide dissociation stimulator	ENSMUSG00000026821	3628.77	-0.00913436	0.0353593	-0.25833	0.796152	0.999135
64930	Tsc1	tuberous sclerosis 1	ENSMUSG00000026812	1784.87	-0.0338617	0.0429029	-0.789264	0.429957	0.999135
269252	Gtf3c4	general transcription factor IIIC, polypeptide 4	ENSMUSG00000035666	1730.98	-0.0537869	0.042366	-1.26958	0.204235	0.999135
269254	Setx	senataxin	ENSMUSG00000043535	1709.35	-0.0287082	0.0429588	-0.668272	0.50396	0.999135
76220	6530402F18Rik	RIKEN cDNA 6530402F18 gene	ENSMUSG00000079499	608.258	-0.0104315	0.0492696	-0.211722	0.832324	0.999135
68975	Med27	mediator complex subunit 27	ENSMUSG00000026799	509.867	-0.0270478	0.0505559	-0.535008	0.592645	0.999135
107746	Rapgef1	Rap guanine nucleotide exchange factor (GEF) 1	ENSMUSG00000039844	4137.75	-0.0374452	0.0362408	-1.03323	0.301495	0.999135
227682	Trub2	TruB pseudouridine (psi) synthase family member 2	ENSMUSG00000039826	626.809	0.0347185	0.0488798	0.710283	0.477529	0.999135
227683	Coq4	coenzyme Q4	ENSMUSG00000026798	430.357	0.0417915	0.050592	0.826049	0.408776	0.999135
26569	Slc27a4	solute carrier family 27 (fatty acid transporter), member 4	ENSMUSG00000059316	4402.04	0.0263901	0.0348262	0.757766	0.448591	0.999135
68205	Urm1	ubiquitin related modifier 1	ENSMUSG00000069020	735.431	0.0552882	0.0487037	1.1352	0.256293	0.999135
18286	Odf2	outer dense fiber of sperm tails 2	ENSMUSG00000026790	1200.36	0.0237102	0.0447202	0.53019	0.595981	0.999135
74412	Gle1	GLE1 RNA export mediator (yeast)	ENSMUSG00000019715	1364.58	0.00979917	0.0449195	0.218149	0.827313	0.999135
71820	Wdr34	WD repeat domain 34	ENSMUSG00000039715	515.249	0.0357338	0.0502601	0.710977	0.477098	0.999135
56086	Set	SET nuclear oncogene	ENSMUSG00000054766	4001.44	0.0218296	0.0370011	0.589972	0.555209	0.999135
227693	Zer1	zyg-11 related, cell cycle regulator	ENSMUSG00000039686	7762.04	-0.0489306	0.0339072	-1.44307	0.148999	0.999135
70296	Tbc1d13	TBC1 domain family, member 13	ENSMUSG00000039678	1936.68	-0.0229383	0.0416693	-0.550483	0.581988	0.999135
227695	Spout1	SPOUT domain containing methyltransferase 1	ENSMUSG00000039660	581.412	-0.0233007	0.0495407	-0.470335	0.638116	0.999135
227697	Dolk	dolichol kinase	ENSMUSG00000075419	447.627	-0.0488304	0.0504657	-0.967594	0.333247	0.999135
227699	Nup188	nucleoporin 188	ENSMUSG00000052533	465.803	-0.0649323	0.0504618	-1.28676	0.198178	0.999135
227700	Sh3glb2	SH3-domain GRB2-like endophilin B2	ENSMUSG00000026860	3411.44	-0.00524893	0.0375149	-0.139916	0.888726	0.999135
108958	Miga2	mitoguardin 2	ENSMUSG00000026858	2056.7	0.043372	0.0401673	1.07978	0.280238	0.999135
57170	Dolpp1	dolichyl pyrophosphate phosphatase 1	ENSMUSG00000026856	419.535	-0.0275575	0.0504317	-0.546432	0.584769	0.999135
12908	Crat	carnitine acetyltransferase	ENSMUSG00000026853	727.317	0.0337132	0.0483605	0.697123	0.485726	0.999135
110854	Ptpa	protein phosphatase 2 protein activator	ENSMUSG00000039515	3672.1	0.0235122	0.0351429	0.669046	0.503466	0.999135
66617	Ntmt1	N-terminal Xaa-Pro-Lys N-methyltransferase 1	ENSMUSG00000026857	688.28	-0.063352	0.0486995	-1.30088	0.193301	0.999135
30934	Tor1b	torsin family 1, member B	ENSMUSG00000026848	805.13	0.0268104	0.0483874	0.554078	0.579525	0.999135
30931	Tor1a	torsin family 1, member A (torsin A)	ENSMUSG00000026849	729.679	-0.0424345	0.0481258	-0.881742	0.377916	0.999135
227707	BC005624	cDNA sequence BC005624	ENSMUSG00000026851	1523.14	0.0372142	0.0436377	0.852801	0.39377	0.999135
74270	Usp20	ubiquitin specific peptidase 20	ENSMUSG00000026854	3319.91	0.000526574	0.0365091	0.0144231	0.988492	0.999135
14269	Fnbp1	formin binding protein 1	ENSMUSG00000075415	1797.68	0.0331917	0.0417239	0.795508	0.426318	0.999135
277463	Gpr107	G protein-coupled receptor 107	ENSMUSG00000000194	1801.34	0.0146961	0.0405433	0.36248	0.716993	0.999135
14299	Ncs1	neuronal calcium sensor 1	ENSMUSG00000062661	6610.58	-0.00343993	0.0330264	-0.104157	0.917045	0.999135
11350	Abl1	c-abl oncogene 1, non-receptor tyrosine kinase	ENSMUSG00000026842	1026.83	0.00851447	0.0454151	0.187481	0.851283	0.999135
227720	Nup214	nucleoporin 214	ENSMUSG00000001855	1191.46	-0.065116	0.0439457	-1.48174	0.13841	0.999135
227721	Plpp7	phospholipid phosphatase 7 (inactive)	ENSMUSG00000051373	592.629	-0.0137387	0.0497494	-0.276158	0.782426	0.999135
227723	Prrc2b	proline-rich coiled-coil 2B	ENSMUSG00000039262	19180.7	-0.020947	0.0279962	-0.748209	0.454334	0.999135
22245	Uck1	uridine-cytidine kinase 1	ENSMUSG00000002550	1056.73	-0.0232258	0.0465946	-0.498465	0.618156	0.999135
72931	Swi5	SWI5 recombination repair homolog (yeast)	ENSMUSG00000044627	1897.81	-0.000782271	0.0446237	-0.0175304	0.986013	0.999135
99412	Golga2	golgi autoantigen, golgin subfamily a, 2	ENSMUSG00000002546	3203.67	0.00181256	0.0378928	0.047834	0.961849	0.999135
13429	Dnm1	dynamin 1	ENSMUSG00000026825	75604.3	-0.0359235	0.0275114	-1.30577	0.191631	0.999135
68379	Ciz1	CDKN1A interacting zinc finger protein 1	ENSMUSG00000039205	934.403	-0.0167143	0.0464921	-0.359509	0.719214	0.999135
73737	1110008P14Rik	RIKEN cDNA 1110008P14 gene	ENSMUSG00000039195	1605.16	0.022117	0.0415031	0.5329	0.594103	0.999135
96979	Ptges2	prostaglandin E synthase 2	ENSMUSG00000026820	816.973	0.0553237	0.0474765	1.16528	0.243904	0.999135
13481	Dpm2	dolichol-phosphate (beta-D) mannosyltransferase 2	ENSMUSG00000026810	639.06	0.00677958	0.0490144	0.138318	0.889989	0.999135
20448	St6galnac4	ST6 (alpha-N-acetyl-neuraminyl-2,3-beta-galactosyl-1,3)-N-acetylgalactosaminide alpha-2,6-sialyltransferase 4	ENSMUSG00000079442	841.293	-0.0208508	0.0477045	-0.437083	0.662051	0.999135
11636	Ak1	adenylate kinase 1	ENSMUSG00000026817	3321.47	0.0490635	0.0369117	1.32921	0.183778	0.999135
107951	Cdk9	cyclin-dependent kinase 9 (CDC2-related kinase)	ENSMUSG00000009555	1476.99	0.00490206	0.0448276	0.109354	0.912922	0.999135
30933	Tor2a	torsin family 2, member A	ENSMUSG00000009563	425.566	-0.0567358	0.050505	-1.12337	0.261281	0.999135
20910	Stxbp1	syntaxin binding protein 1	ENSMUSG00000026797	37471.1	-0.0208928	0.0250497	-0.834053	0.404251	0.999135
227737	Fam129b	family with sequence similarity 129, member B	ENSMUSG00000026796	328.52	-0.0367015	0.0504292	-0.727783	0.466746	0.999135
227738	Lrsam1	leucine rich repeat and sterile alpha motif containing 1	ENSMUSG00000026792	1071.54	-0.00171376	0.0449665	-0.0381119	0.969598	0.999135
269261	Rpl12	ribosomal protein L12	ENSMUSG00000038900	1014.2	-0.000641079	0.0469189	-0.0136636	0.989098	0.999135
56017	Slc2a8	solute carrier family 2, (facilitated glucose transporter), member 8	ENSMUSG00000026791	332.557	-0.00913133	0.0504518	-0.180991	0.856375	0.999135
99326	Garnl3	GTPase activating RANGAP domain-like 3	ENSMUSG00000038860	1119.13	0.057659	0.0483793	1.19181	0.233335	0.999135
241308	Ralgps1	Ral GEF with PH domain and SH3 binding motif 1	ENSMUSG00000038831	1516.13	-0.0060916	0.0439006	-0.138759	0.889641	0.999135
241311	Zbtb34	zinc finger and BTB domain containing 34	ENSMUSG00000068966	355.464	0.005692	0.0504193	0.112893	0.910115	0.999135
71834	Zbtb43	zinc finger and BTB domain containing 43	ENSMUSG00000026788	725.524	-0.0390408	0.0485875	-0.803516	0.421676	0.999135
72543	Mvb12b	multivesicular body subunit 12B	ENSMUSG00000038740	4489.61	-0.00476866	0.0322242	-0.147984	0.882356	0.999135
227743	Mapkap1	mitogen-activated protein kinase associated protein 1	ENSMUSG00000038696	1281.06	0.0635634	0.0447647	1.41994	0.155624	0.999135
66691	Gapvd1	GTPase activating protein and VPS9 domains 1	ENSMUSG00000026867	2856.33	-0.0240919	0.0385891	-0.62432	0.532418	0.999135
14828	Hspa5	heat shock protein 5	ENSMUSG00000026864	8977.43	0.0364471	0.0505833	0.720535	0.471196	0.999135
227746	Rabepk	Rab9 effector protein with kelch motifs	ENSMUSG00000070953	434.166	0.00136284	0.0505253	0.0269735	0.978481	0.999135
30050	Fbxw2	F-box and WD-40 domain protein 2	ENSMUSG00000035949	1252.96	0.00825666	0.0456027	0.181057	0.856323	0.999135
66998	Psmd5	proteasome (prosome, macropain) 26S subunit, non-ATPase, 5	ENSMUSG00000026869	1624.84	-0.0194761	0.0414269	-0.470133	0.63826	0.999135
68365	Rab14	RAB14, member RAS oncogene family	ENSMUSG00000026878	7252.59	-0.0179924	0.0303585	-0.592664	0.553406	0.999135
69601	Dab2ip	disabled 2 interacting protein	ENSMUSG00000026883	4321.56	0.00314283	0.035578	0.0883364	0.929609	0.999135
74410	Ttll11	tubulin tyrosine ligase-like family, member 11	ENSMUSG00000026885	934.078	0.0407922	0.0460304	0.886201	0.375509	0.999135
68375	Ndufa8	NADH dehydrogenase (ubiquinone) 1 alpha subcomplex, 8	ENSMUSG00000026895	1554.33	-0.0159409	0.04278	-0.372624	0.709428	0.999135
67889	Rbm18	RNA binding motif protein 18	ENSMUSG00000026889	1471.92	-0.0102024	0.043252	-0.235883	0.813523	0.999135
67871	Mrrf	mitochondrial ribosome recycling factor	ENSMUSG00000026887	446.216	-0.0141493	0.0504954	-0.28021	0.779317	0.999135
67466	Pdcl	phosducin-like	ENSMUSG00000009030	562.736	-0.0206565	0.0495603	-0.416796	0.676828	0.999135
319817	Rc3h2	ring finger and CCCH-type zinc finger domains 2	ENSMUSG00000075376	1989.22	0.00189919	0.0412472	0.0460442	0.963275	0.999135
241322	Zbtb6	zinc finger and BTB domain containing 6	ENSMUSG00000066798	364.626	0.0152181	0.0505962	0.300776	0.763585	0.999135
227800	Rabgap1	RAB GTPase activating protein 1	ENSMUSG00000035437	3445.89	-0.0345099	0.036049	-0.957305	0.338413	0.999135
227801	Dennd1a	DENN/MADD domain containing 1A	ENSMUSG00000035392	1585.36	-0.00379255	0.0419609	-0.0903829	0.927983	0.999135
16870	Lhx2	LIM homeobox protein 2	ENSMUSG00000000247	1074.32	0.0244718	0.0466614	0.524455	0.599962	0.999135
59126	Nek6	NIMA (never in mitosis gene a)-related expressed kinase 6	ENSMUSG00000026749	1228.06	-0.0632093	0.0435125	-1.45267	0.146315	0.999135
19177	Psmb7	proteasome (prosome, macropain) subunit, beta type 7	ENSMUSG00000026750	3102.09	0.0407088	0.0367198	1.10863	0.267589	0.999135
66489	Rpl35	ribosomal protein L35	ENSMUSG00000062997	551.03	0.0526338	0.0498954	1.05488	0.291479	0.999135
76899	Golga1	golgi autoantigen, golgin subfamily a, 1	ENSMUSG00000026754	545.587	0.0214551	0.0498348	0.430524	0.666815	0.999135
320271	Scai	suppressor of cancer cell invasion	ENSMUSG00000035236	2799.02	0.0188226	0.0367546	0.512115	0.60857	0.999135
67857	Ppp6c	protein phosphatase 6, catalytic subunit	ENSMUSG00000026753	1594.98	-0.0291395	0.0416277	-0.700002	0.483926	0.999135
94217	Lrp1b	low density lipoprotein-related protein 1B (deleted in tumors)	ENSMUSG00000049252	1134.12	0.0106977	0.0458682	0.233226	0.815586	0.999135
227835	Gtdc1	glycosyltransferase-like domain containing 1	ENSMUSG00000036890	815.784	0.0278441	0.0478827	0.581507	0.560899	0.999135
24136	Zeb2	zinc finger E-box binding homeobox 2	ENSMUSG00000026872	7784.3	-0.039252	0.0370378	-1.05978	0.289243	0.999135
11480	Acvr2a	activin receptor IIA	ENSMUSG00000052155	1887.04	0.0196024	0.0455048	0.430776	0.666631	0.999135
26428	Orc4	origin recognition complex, subunit 4	ENSMUSG00000026761	753.728	0.0215722	0.0484299	0.445432	0.656007	0.999135
109241	Mbd5	methyl-CpG binding domain protein 5	ENSMUSG00000036792	2218.14	0.0294173	0.0403805	0.728502	0.466307	0.999135
NA	NA	NA	ENSMUSG00000081272	1220.23	0.0415447	0.0437839	0.948857	0.342693	0.999135
227867	Epc2	enhancer of polycomb homolog 2	ENSMUSG00000069495	1271.05	-0.0170136	0.0447308	-0.380356	0.703681	0.999135
16574	Kif5c	kinesin family member 5C	ENSMUSG00000026764	28623.1	-0.0272869	0.026114	-1.04492	0.296062	0.999135
109129	Mmadhc	methylmalonic aciduria (cobalamin deficiency) cblD type, with homocystinuria	ENSMUSG00000026766	766.49	-0.0563256	0.049054	-1.14824	0.25087	0.999135
74194	Rnd3	Rho family GTPase 3	ENSMUSG00000017144	397.671	-0.00478632	0.0505343	-0.0947143	0.924542	0.999135
71684	Rbm43	RNA binding motif protein 43	ENSMUSG00000036249	396.68	-0.008599	0.0505713	-0.170037	0.864981	0.999135
75423	Arl5a	ADP-ribosylation factor-like 5A	ENSMUSG00000036093	1448.62	-0.0181651	0.0425441	-0.426971	0.669401	0.999135
56324	Stam2	signal transducing adaptor molecule (SH3 domain and ITAM motif) 2	ENSMUSG00000055371	732.778	-0.0387809	0.0483046	-0.80284	0.422067	0.999135
71409	Fmnl2	formin-like 2	ENSMUSG00000036053	804.248	0.0143265	0.047786	0.299806	0.764325	0.999135
56194	Prpf40a	pre-mRNA processing factor 40A	ENSMUSG00000061136	1192.02	-0.0182149	0.0439084	-0.414838	0.678261	0.999135
67874	Rprm	reprimo, TP53 dependent G2 arrest mediator candidate	ENSMUSG00000075334	712.754	-0.0469118	0.0498801	-0.94049	0.346966	0.999135
271786	Galnt13	polypeptide N-acetylgalactosaminyltransferase 13	ENSMUSG00000060988	406.143	0.0341818	0.0505238	0.676548	0.498693	0.999135
16519	Kcnj3	potassium inwardly-rectifying channel, subfamily J, member 3	ENSMUSG00000026824	4786.01	0.0416607	0.0363743	1.14533	0.252071	0.999135
14571	Gpd2	glycerol phosphate dehydrogenase 2, mitochondrial	ENSMUSG00000026827	6763.38	-0.0299721	0.0326816	-0.917095	0.359093	0.999135
269275	Acvr1c	activin A receptor, type IC	ENSMUSG00000026834	437.805	-0.0459456	0.0505994	-0.908027	0.363864	0.999135
227933	Ccdc148	coiled-coil domain containing 148	ENSMUSG00000036641	374.819	0.031654	0.0505992	0.625583	0.531588	0.999135
227937	Pkp4	plakophilin 4	ENSMUSG00000026991	7804.18	0.0319403	0.0300247	1.0638	0.287419	0.999135
407823	Baz2b	bromodomain adjacent to zinc finger domain, 2B	ENSMUSG00000026987	490.651	-0.0596781	0.0500681	-1.19194	0.233286	0.999135
57438	2022-03-07	membrane-associated ring finger (C3HC4) 7	ENSMUSG00000026977	1168.38	-0.0151901	0.0466969	-0.325291	0.744961	0.999135
21353	Tank	TRAF family member-associated Nf-kappa B activator	ENSMUSG00000064289	381.424	-0.0197082	0.0504703	-0.390492	0.696173	0.999135
59029	Psmd14	proteasome (prosome, macropain) 26S subunit, non-ATPase, 14	ENSMUSG00000026914	2075.1	-0.0181726	0.0401706	-0.452385	0.650992	0.999135
21375	Tbr1	T-box brain gene 1	ENSMUSG00000035033	2636.97	0.0683054	0.0452551	1.50934	0.131212	0.999135
94229	Slc4a10	solute carrier family 4, sodium bicarbonate cotransporter-like, member 10	ENSMUSG00000026904	7421.53	-0.00848401	0.0328208	-0.258495	0.796025	0.999135
50915	Grb14	growth factor receptor bound protein 14	ENSMUSG00000026888	823.771	0.0562096	0.0477041	1.1783	0.238678	0.999135
20269	Scn3a	sodium channel, voltage-gated, type III, alpha	ENSMUSG00000057182	1364.35	0.0640778	0.0469968	1.36345	0.17274	0.999135
110876	Scn2a	sodium channel, voltage-gated, type II, alpha	ENSMUSG00000075318	14299.5	0.0269521	0.0304745	0.884415	0.376472	0.999135
77771	Csrnp3	cysteine-serine-rich nuclear protein 3	ENSMUSG00000044647	2886.73	0.0157069	0.0421186	0.37292	0.709208	0.999135
20265	Scn1a	sodium channel, voltage-gated, type I, alpha	ENSMUSG00000064329	1654.7	0.0376168	0.0432336	0.870081	0.384256	0.999135
26877	B3galt1	UDP-Gal:betaGlcNAc beta 1,3-galactosyltransferase, polypeptide 1	ENSMUSG00000034780	1305.85	0.0107014	0.0430956	0.248318	0.803888	0.999135
241447	Cers6	ceramide synthase 6	ENSMUSG00000027035	2184.51	-0.00437138	0.0381544	-0.114571	0.908785	0.999135
320720	Fastkd1	FAST kinase domains 1	ENSMUSG00000027086	394.418	0.00847662	0.0505967	0.167533	0.866951	0.999135
228005	Ppig	peptidyl-prolyl isomerase G (cyclophilin G)	ENSMUSG00000042133	1599.18	0.00503093	0.0422372	0.119111	0.905187	0.999135
73373	Phospho2	phosphatase, orphan 2	ENSMUSG00000027088	611.05	-0.0206397	0.0496457	-0.415741	0.677599	0.999135
277396	Klhl23	kelch-like 23	ENSMUSG00000042155	3599.41	-0.0561055	0.0392517	-1.42938	0.152896	0.999135
20823	Ssb	Sjogren syndrome antigen B	ENSMUSG00000068882	3408.84	-0.00205622	0.0360439	-0.0570478	0.954507	0.999135
68795	Ubr3	ubiquitin protein ligase E3 component n-recognin 3	ENSMUSG00000044308	7165.17	-0.0384488	0.0296283	-1.2977	0.19439	0.999135
14415	Gad1	glutamate decarboxylase 1	ENSMUSG00000070880	610.662	0.0473454	0.0503937	0.93951	0.347469	0.999135
70231	Gorasp2	golgi reassembly stacking protein 2	ENSMUSG00000014959	3435.61	0.0498532	0.0356913	1.39679	0.162478	0.999135
13427	Dync1i2	dynein cytoplasmic 1 intermediate chain 2	ENSMUSG00000027012	3619.49	0.00220204	0.0395569	0.0556675	0.955607	0.999135
78830	Slc25a12	solute carrier family 25 (mitochondrial carrier, Aralar), member 12	ENSMUSG00000027010	6658.11	0.040983	0.031069	1.3191	0.187137	0.999135
56508	Rapgef4	Rap guanine nucleotide exchange factor (GEF) 4	ENSMUSG00000049044	3184.65	0.0533774	0.0419697	1.27181	0.203442	0.999135
67059	Ola1	Obg-like ATPase 1	ENSMUSG00000027108	4305.53	0.0276009	0.0339719	0.81246	0.416527	0.999135
66935	Cir1	corepressor interacting with RBPJ, 1	ENSMUSG00000041777	581.601	0.00549592	0.0495943	0.110818	0.911761	0.999135
74616	Scrn3	secernin 3	ENSMUSG00000008226	1017.06	-0.0271599	0.0454269	-0.597881	0.549919	0.999135
68526	Gpr155	G protein-coupled receptor 155	ENSMUSG00000041762	1840.92	-0.0436989	0.041687	-1.04826	0.294518	0.999135
108699	Chn1	chimerin 1	ENSMUSG00000056486	35428.4	0.0155206	0.0318476	0.487341	0.626017	0.999135
11909	Atf2	activating transcription factor 2	ENSMUSG00000027104	3764.24	0.020098	0.034648	0.580062	0.561873	0.999135
228033	Atp5g3	ATP synthase, H+ transporting, mitochondrial F0 complex, subunit C3 (subunit 9)	ENSMUSG00000018770	4885.72	-0.00420073	0.0353034	-0.118989	0.905284	0.999135
69605	Lnpk	lunapark, ER junction formation factor	ENSMUSG00000009207	1476.64	-0.0174	0.0460448	-0.377894	0.705509	0.999135
53375	Mtx2	metaxin 2	ENSMUSG00000027099	816.528	0.000535816	0.047733	0.0112253	0.991044	0.999135
229279	Hnrnpa3	heterogeneous nuclear ribonucleoprotein A3	ENSMUSG00000059005	5794.45	-0.0337138	0.0321629	-1.04822	0.294537	0.999135
228061	Agps	alkylglycerone phosphate synthase	ENSMUSG00000042410	1536.67	-0.0231814	0.0432346	-0.536176	0.591837	0.999135
72421	Ttc30b	tetratricopeptide repeat domain 30B	ENSMUSG00000075273	392.36	-0.00700841	0.0504346	-0.13896	0.889481	0.999135
241490	Rbm45	RNA binding motif protein 45	ENSMUSG00000042369	698.013	-0.0518605	0.0493991	-1.04983	0.293798	0.999135
99031	Osbpl6	oxysterol binding protein-like 6	ENSMUSG00000042359	2891.75	-0.0296292	0.0373759	-0.792737	0.427931	0.999135
83435	Plekha3	pleckstrin homology domain-containing, family A (phosphoinositide binding specific) member 3	ENSMUSG00000002733	517.852	-0.0754043	0.0502519	-1.50053	0.133478	0.999135
228071	Sestd1	SEC14 and spectrin domains 1	ENSMUSG00000042272	3242.62	0.0279866	0.0370245	0.755894	0.449713	0.999135
241494	Zfp385b	zinc finger protein 385B	ENSMUSG00000027016	1495.98	0.0308435	0.042854	0.719736	0.471688	0.999135
80744	Cwc22	CWC22 spliceosome-associated protein	ENSMUSG00000027014	353.591	-0.00929527	0.0505379	-0.183927	0.854071	0.999135
22193	Ube2e3	ubiquitin-conjugating enzyme E2E 3	ENSMUSG00000027011	1724.93	0.0165853	0.0412352	0.402212	0.687528	0.999135
16401	Itga4	integrin alpha 4	ENSMUSG00000027009	717.363	0.00512991	0.0379631	0.135129	0.89251	0.999135
18012	Neurod1	neurogenic differentiation 1	ENSMUSG00000034701	755.206	-0.0533767	0.0483907	-1.10304	0.270011	0.999135
18573	Pde1a	phosphodiesterase 1A, calmodulin-dependent	ENSMUSG00000059173	10154.9	0.0155901	0.030182	0.516535	0.605481	0.999135
66861	Dnajc10	DnaJ heat shock protein family (Hsp40) member C10	ENSMUSG00000027006	1957.05	-0.0165966	0.0395448	-0.41969	0.674712	0.999135
20378	Frzb	frizzled-related protein	ENSMUSG00000027004	1190.68	0.0285278	0.0474932	0.600672	0.548058	0.999135
50884	Nckap1	NCK-associated protein 1	ENSMUSG00000027002	23280.3	-0.0380592	0.0427898	-0.889446	0.373764	0.999135
69082	Zc3h15	zinc finger CCCH-type containing 15	ENSMUSG00000027091	3510.34	0.00446554	0.0381568	0.117031	0.906835	0.999135
16410	Itgav	integrin alpha V	ENSMUSG00000027087	355.454	0.0235733	0.0505457	0.466377	0.640946	0.999135
241520	Fam171b	family with sequence similarity 171, member B	ENSMUSG00000048388	9893.52	0.0245611	0.0354879	0.692097	0.488876	0.999135
12388	Ctnnd1	catenin (cadherin associated protein), delta 1	ENSMUSG00000034101	361.079	-0.00615603	0.0505934	-0.121677	0.903155	0.999135
66958	Tmx2	thioredoxin-related transmembrane protein 2	ENSMUSG00000050043	3182.81	0.0047386	0.0362307	0.13079	0.895942	0.999135
381379	Med19	mediator complex subunit 19	ENSMUSG00000027080	913.774	-0.0180537	0.0471672	-0.382759	0.701898	0.999135
228136	Zdhhc5	zinc finger, DHHC domain containing 5	ENSMUSG00000034075	1525.71	0.0143329	0.0422869	0.338945	0.734651	0.999135
241525	Ypel4	yippee like 4	ENSMUSG00000034059	481.828	0.0138124	0.050247	0.274889	0.783402	0.999135
30059	Timm10	translocase of inner mitochondrial membrane 10	ENSMUSG00000027076	416.44	-0.00651648	0.050512	-0.129009	0.897351	0.999135
269295	Rtn4rl2	reticulon 4 receptor-like 2	ENSMUSG00000050896	2512.53	-0.04261	0.0415727	-1.02495	0.305386	0.999135
241528	Lrrc55	leucine rich repeat containing 55	ENSMUSG00000075224	507.664	0.00708901	0.0503308	0.140849	0.88799	0.999135
19271	Ptprj	protein tyrosine phosphatase, receptor type, J	ENSMUSG00000025314	4075.39	-0.0478462	0.0368142	-1.29967	0.193714	0.999135
55935	Fnbp4	formin binding protein 4	ENSMUSG00000008200	710.763	0.00187802	0.0493788	0.0380329	0.969661	0.999135
56428	Mtch2	mitochondrial carrier 2	ENSMUSG00000027282	2493.12	0.000398194	0.0377147	0.010558	0.991576	0.999135
67445	C1qtnf4	C1q and tumor necrosis factor related protein 4	ENSMUSG00000040794	3662.39	-0.0351727	0.03768	-0.933456	0.350584	0.999135
68349	Ndufs3	NADH dehydrogenase (ubiquinone) Fe-S protein 3	ENSMUSG00000005510	1729.12	0.0187677	0.0430435	0.436016	0.662825	0.999135
67136	Kbtbd4	kelch repeat and BTB (POZ) domain containing 4	ENSMUSG00000005505	858.201	0.0188599	0.0485367	0.38857	0.697594	0.999135
13046	Celf1	CUGBP, Elav-like family member 1	ENSMUSG00000005506	7199.1	0.0237389	0.0321187	0.739098	0.459847	0.999135
19182	Psmc3	proteasome (prosome, macropain) 26S subunit, ATPase 3	ENSMUSG00000002102	4407.7	0.00366943	0.0325017	0.1129	0.91011	0.999135
11432	Acp2	acid phosphatase 2, lysosomal	ENSMUSG00000002103	3243.86	0.0117885	0.0363488	0.324317	0.745698	0.999135
228359	Arhgap1	Rho GTPase activating protein 1	ENSMUSG00000027247	2546.17	0.0315474	0.0391129	0.806573	0.419913	0.999135
51897	Atg13	autophagy related 13	ENSMUSG00000027244	2422.1	0.00914408	0.0379291	0.241084	0.80949	0.999135
228361	Ambra1	autophagy/beclin 1 regulator 1	ENSMUSG00000040506	2350.34	-0.0455328	0.0406022	-1.12144	0.262102	0.999135
12672	Chrm4	cholinergic receptor, muscarinic 4	ENSMUSG00000040495	498.119	-0.00970008	0.0505432	-0.191917	0.847808	0.999135
104418	Dgkz	diacylglycerol kinase zeta	ENSMUSG00000040479	16622	0.0310324	0.0371068	0.8363	0.402986	0.999135
192285	Phf21a	PHD finger protein 21A	ENSMUSG00000058318	1016.86	-0.0193343	0.0471405	-0.410142	0.681702	0.999135
18633	Pex16	peroxisomal biogenesis factor 16	ENSMUSG00000027222	342.847	0.0060744	0.0505945	0.120061	0.904435	0.999135
12953	Cry2	cryptochrome 2 (photolyase-like)	ENSMUSG00000068742	4864.67	-0.0229061	0.0336506	-0.680705	0.496058	0.999135
228368	Slc35c1	solute carrier family 35, member C1	ENSMUSG00000049922	588.099	-0.0407776	0.0494271	-0.825005	0.409369	0.999135
76969	Chst1	carbohydrate (keratan sulfate Gal-6) sulfotransferase 1	ENSMUSG00000027221	7789.56	-0.0454765	0.0350144	-1.2988	0.194013	0.999135
100042784	Prdm11	PR domain containing 11	ENSMUSG00000075028	759.574	0.0657718	0.0494884	1.32903	0.183837	0.999135
620695	Gm13889	predicted gene 13889	ENSMUSG00000087006	447.575	0.0267959	0.0498947	0.537049	0.591234	0.999135
56348	Hsd17b12	hydroxysteroid (17-beta) dehydrogenase 12	ENSMUSG00000027195	1398.42	-0.0123858	0.0433035	-0.286022	0.774861	0.999135
74569	Ttc17	tetratricopeptide repeat domain 17	ENSMUSG00000027194	1019.05	0.0453675	0.0463438	0.978933	0.327613	0.999135
241568	Lrrc4c	leucine rich repeat containing 4C	ENSMUSG00000050587	2417.46	0.0121839	0.0408126	0.298532	0.765297	0.999135
76501	Commd9	COMM domain containing 9	ENSMUSG00000027163	351.486	0.0340599	0.0505482	0.673811	0.500431	0.999135
80985	Trim44	tripartite motif-containing 44	ENSMUSG00000027189	9109.05	0.0310839	0.0322698	0.963251	0.335422	0.999135
14221	Fjx1	four jointed box 1	ENSMUSG00000075012	1029.38	0.0631277	0.0486239	1.29829	0.194189	0.999135
210622	Pamr1	peptidase domain containing associated with muscle regeneration 1	ENSMUSG00000027188	369.574	0.0390985	0.0495124	0.789671	0.42972	0.999135
27402	Pdhx	pyruvate dehydrogenase complex, component X	ENSMUSG00000010914	1933.28	0.00738774	0.0396984	0.186097	0.852369	0.999135
12359	Cat	catalase	ENSMUSG00000027187	1684.83	-0.0100481	0.0437311	-0.229771	0.81827	0.999135
98956	Nat10	N-acetyltransferase 10	ENSMUSG00000027185	691.334	-0.0114857	0.0482887	-0.237854	0.811994	0.999135
53872	Caprin1	cell cycle associated protein 1	ENSMUSG00000027184	9776.99	-0.0213727	0.0276572	-0.772772	0.439657	0.999135
57443	Fbxo3	F-box protein 3	ENSMUSG00000027180	1637.1	-0.00458995	0.0423922	-0.108273	0.913779	0.999135
241589	D430041D05Rik	RIKEN cDNA D430041D05 gene	ENSMUSG00000068373	7978.28	0.0354841	0.0313414	1.13218	0.257558	0.999135
15259	Hipk3	homeodomain interacting protein kinase 3	ENSMUSG00000027177	2214.83	-0.00885281	0.0415007	-0.213317	0.831079	0.999135
228410	Cstf3	cleavage stimulation factor, 3' pre-RNA, subunit 3	ENSMUSG00000027176	838.841	0.0454777	0.0481388	0.94472	0.344802	0.999135
98221	Eif3m	eukaryotic translation initiation factor 3, subunit M	ENSMUSG00000027170	1210.8	0.027066	0.0447774	0.604457	0.54554	0.999135
77766	Elp4	elongator acetyltransferase complex subunit 4	ENSMUSG00000027167	331.226	0.00348313	0.050471	0.0690125	0.94498	0.999135
77015	Mpped2	metallophosphoesterase domain containing 2	ENSMUSG00000016386	1229.34	0.0302465	0.0446229	0.677824	0.497883	0.999135
212772	Arl14ep	ADP-ribosylation factor-like 14 effector protein	ENSMUSG00000027122	1182.73	-0.0520819	0.0450684	-1.15562	0.247837	0.999135
16492	Kcna4	potassium voltage-gated channel, shaker-related subfamily, member 4	ENSMUSG00000042604	880.961	-0.0125757	0.0488042	-0.257676	0.796657	0.999135
228432	Ano3	anoctamin 3	ENSMUSG00000074968	2981.73	0.0535508	0.0384727	1.39192	0.163947	0.999135
99010	Lpcat4	lysophosphatidylcholine acyltransferase 4	ENSMUSG00000027134	1387.1	0.0564983	0.0436363	1.29475	0.195405	0.999135
66181	Nop10	NOP10 ribonucleoprotein	ENSMUSG00000027133	509.233	-0.0314085	0.0504905	-0.622068	0.533897	0.999135
107723	Slc12a6	solute carrier family 12, member 6	ENSMUSG00000027130	1313.09	0.0415839	0.0435776	0.95425	0.339957	0.999135
68032	Emc4	ER membrane protein complex subunit 4	ENSMUSG00000027131	2109.3	-0.0102666	0.0411497	-0.249495	0.802978	0.999135
73024	Emc7	ER membrane protein complex subunit 7	ENSMUSG00000055943	2393.97	-0.0427427	0.0386287	-1.1065	0.26851	0.999135
20192	Ryr3	ryanodine receptor 3	ENSMUSG00000057378	1277.17	0.00484295	0.0447269	0.108278	0.913775	0.999135
228491	Zfp770	zinc finger protein 770	ENSMUSG00000040321	910.116	-0.0457586	0.046983	-0.973939	0.330087	0.999135
17536	Meis2	Meis homeobox 2	ENSMUSG00000027210	1115.17	-0.0071375	0.0483165	-0.147724	0.882561	0.999135
114715	Spred1	sprouty protein with EVH-1 domain 1, related sequence	ENSMUSG00000027351	2088.4	0.0159081	0.0420648	0.37818	0.705297	0.999135
68215	Fam98b	family with sequence similarity 98, member B	ENSMUSG00000027349	988.77	-0.0335141	0.0472234	-0.709694	0.477894	0.999135
381413	Gpr176	G protein-coupled receptor 176	ENSMUSG00000040133	442.784	-0.0046299	0.0504529	-0.0917668	0.926883	0.999135
27103	Eif2ak4	eukaryotic translation initiation factor 2 alpha kinase 4	ENSMUSG00000005102	503.614	0.0319902	0.0500258	0.639474	0.522515	0.999135
383787	Ankrd63	ankyrin repeat domain 63	ENSMUSG00000078137	1071.89	-0.0699959	0.0499637	-1.40093	0.161234	0.999135
214240	Disp2	dispatched RND tramsporter family member 2	ENSMUSG00000040035	19263.5	-0.0234071	0.0258979	-0.903824	0.366089	0.999135
56357	Ivd	isovaleryl coenzyme A dehydrogenase	ENSMUSG00000027332	1700.64	-0.0170114	0.0428644	-0.396866	0.691467	0.999135
67809	Rmdn3	regulator of microtubule dynamics 3	ENSMUSG00000070730	925.281	0.0441924	0.0470712	0.93884	0.347813	0.999135
72008	Zfyve19	zinc finger, FYVE domain containing 19	ENSMUSG00000068580	332.101	0.0387994	0.0505222	0.767967	0.442507	0.999135
228545	Vps18	VPS18 CORVET/HOPS core subunit	ENSMUSG00000034216	1983.48	0.00913342	0.0411113	0.222163	0.824187	0.999135
68142	Ino80	INO80 complex subunit	ENSMUSG00000034154	495.723	0.0152355	0.0501874	0.303573	0.761454	0.999135
56398	Chp1	calcineurin-like EF hand protein 1	ENSMUSG00000014077	4431.99	0.00858899	0.0375568	0.228693	0.819107	0.999135
66602	1700020I14Rik	RIKEN cDNA 1700020I14 gene	ENSMUSG00000085438	8918.4	0.00785774	0.0332348	0.236431	0.813098	0.999135
76246	Rtf1	RTF1, Paf1/RNA polymerase II complex component	ENSMUSG00000027304	3602.68	-0.0155616	0.038672	-0.402399	0.68739	0.999135
228550	Itpka	inositol 1,4,5-trisphosphate 3-kinase A	ENSMUSG00000027296	5832.79	-0.0279721	0.0496276	-0.563639	0.573	0.999135
68925	Rpap1	RNA polymerase II associated protein 1	ENSMUSG00000034032	548.486	0.000723546	0.0500851	0.0144463	0.988474	0.999135
22174	Tyro3	TYRO3 protein tyrosine kinase 3	ENSMUSG00000027298	3643.05	0.0197295	0.0375721	0.52511	0.599507	0.999135
26390	Mapkbp1	mitogen-activated protein kinase binding protein 1	ENSMUSG00000033902	2741.22	-0.0196705	0.0361415	-0.544264	0.58626	0.999135
269338	Vps39	VPS39 HOPS complex subunit	ENSMUSG00000027291	2099.4	-0.0588034	0.0390909	-1.50427	0.132511	0.999135
211499	Tmem87a	transmembrane protein 87A	ENSMUSG00000033808	883.462	0.0666966	0.048255	1.38217	0.16692	0.999135
68968	Cdan1	congenital dyserythropoietic anemia, type I (human)	ENSMUSG00000027284	335.646	-0.0623403	0.0503242	-1.23877	0.215429	0.999135
140810	Ttbk2	tau tubulin kinase 2	ENSMUSG00000090100	1613.82	0.0587643	0.0431485	1.36191	0.173227	0.999135
96957	Tmem62	transmembrane protein 62	ENSMUSG00000054484	583.933	-0.0276894	0.0498294	-0.555685	0.578426	0.999135
17151	Ccndbp1	cyclin D-type binding-protein 1	ENSMUSG00000023572	1197.47	0.0162609	0.0451551	0.360113	0.718763	0.999135
51885	Tubgcp4	tubulin, gamma complex associated protein 4	ENSMUSG00000027263	494.061	0.0449068	0.0504041	0.890936	0.372964	0.999135
27223	Trp53bp1	transformation related protein 53 binding protein 1	ENSMUSG00000043909	2694.74	0.0230358	0.0365289	0.630618	0.52829	0.999135
327655	Ppip5k1	diphosphoinositol pentakisphosphate kinase 1	ENSMUSG00000033526	2582.92	-0.0368666	0.0386444	-0.953998	0.340085	0.999135
378702	Serf2	small EDRK-rich factor 2	ENSMUSG00000074884	1066.14	0.0437887	0.0454334	0.963799	0.335147	0.999135
67532	Mfap1a	microfibrillar-associated protein 1A	ENSMUSG00000068479	719.222	0.0114384	0.0482283	0.237172	0.812524	0.999135
329506	Ctdspl2	CTD (carboxy-terminal domain, RNA polymerase II, polypeptide A) small phosphatase like 2	ENSMUSG00000033411	720.177	0.00890405	0.0483501	0.184158	0.853889	0.999135
214585	Spg11	SPG11, spatacsin vesicle trafficking associated	ENSMUSG00000033396	459.308	0.00566828	0.0505883	0.112047	0.910786	0.999135
435684	Shf	Src homology 2 domain containing F	ENSMUSG00000033256	1331.62	0.0086532	0.0452402	0.191272	0.848312	0.999135
67092	Gatm	glycine amidinotransferase (L-arginine:glycine amidinotransferase)	ENSMUSG00000027199	468.199	0.0457462	0.0505992	0.90409	0.365948	0.999135
22785	Slc30a4	solute carrier family 30 (zinc transporter), member 4	ENSMUSG00000005802	1079.91	-0.0636356	0.0454114	-1.40131	0.161121	0.999135
214968	Sema6d	sema domain, transmembrane domain (TM), and cytoplasmic domain, (semaphorin) 6D	ENSMUSG00000027200	1026.63	0.0251825	0.0496332	0.507371	0.611895	0.999135
17876	Myef2	myelin basic protein expression factor 2, repressor	ENSMUSG00000027201	1827.82	0.0104311	0.0418971	0.248969	0.803384	0.999135
110074	Dut	deoxyuridine triphosphatase	ENSMUSG00000027203	458.4	-0.0336923	0.0503771	-0.668801	0.503622	0.999135
58521	Eid1	EP300 interacting inhibitor of differentiation 1	ENSMUSG00000091337	8744.59	0.0127372	0.0312241	0.407927	0.683327	0.999135
70354	Secisbp2l	SECIS binding protein 2-like	ENSMUSG00000035093	4777.04	0.00874808	0.0324826	0.269316	0.787687	0.999135
12848	Cops2	COP9 signalosome subunit 2	ENSMUSG00000027206	2882.1	0.0127575	0.0392057	0.325399	0.744879	0.999135
69976	Galk2	galactokinase 2	ENSMUSG00000027207	650.846	0.0301529	0.0489266	0.616289	0.537704	0.999135
14391	Gabpb1	GA repeat binding protein, beta 1	ENSMUSG00000027361	353.26	-0.0164543	0.0505579	-0.325455	0.744837	0.999135
84092	Usp8	ubiquitin specific peptidase 8	ENSMUSG00000027363	1402.09	0.0387954	0.0428713	0.904927	0.365504	0.999135
58800	Trpm7	transient receptor potential cation channel, subfamily M, member 7	ENSMUSG00000027365	794.692	-0.00689771	0.0487309	-0.141547	0.887438	0.999135
66552	Sppl2a	signal peptide peptidase like 2A	ENSMUSG00000027366	698.666	-0.0691951	0.04872	-1.42026	0.155532	0.999135
26371	Ciao1	cytosolic iron-sulfur protein assembly 1	ENSMUSG00000003662	1423.08	-0.0685134	0.0452573	-1.51387	0.13006	0.999135
69470	Tmem127	transmembrane protein 127	ENSMUSG00000034850	4681.13	0.0403556	0.0332304	1.21442	0.224588	0.999135
99138	Stard7	START domain containing 7	ENSMUSG00000027367	4816.04	0.00392309	0.0339582	0.115527	0.908027	0.999135
56461	Kcnip3	Kv channel interacting protein 3, calsenilin	ENSMUSG00000079056	2017.01	-0.0647799	0.050384	-1.28572	0.19854	0.999135
77721	Mrps5	mitochondrial ribosomal protein S5	ENSMUSG00000027374	775.374	-0.0114463	0.0482228	-0.237364	0.812375	0.999135
72477	Tmem87b	transmembrane protein 87B	ENSMUSG00000014353	981.759	0.0116911	0.0459874	0.254225	0.799322	0.999135
78751	Zc3h6	zinc finger CCCH type containing 6	ENSMUSG00000042851	375.013	0.0432075	0.0505971	0.853952	0.393131	0.999135
69737	Ttl	tubulin tyrosine ligase	ENSMUSG00000027394	2473.6	-0.0405155	0.0410353	-0.987332	0.32348	0.999135
19261	Sirpa	signal-regulatory protein alpha	ENSMUSG00000037902	13035.9	0.00992799	0.0281357	0.352861	0.724193	0.999135
67333	Stk35	serine/threonine kinase 35	ENSMUSG00000037885	607.575	-0.0281534	0.0492339	-0.57183	0.567437	0.999135
20638	Snrpb	small nuclear ribonucleoprotein B	ENSMUSG00000027404	1323.87	-0.035082	0.0441715	-0.794221	0.427067	0.999135
67134	Nop56	NOP56 ribonucleoprotein	ENSMUSG00000027405	1512.42	-0.0168022	0.0426972	-0.39352	0.693936	0.999135
170718	Idh3b	isocitrate dehydrogenase 3 (NAD+) beta	ENSMUSG00000027406	5724.12	0.00191187	0.0326412	0.0585722	0.953293	0.999135
319513	Pced1a	PC-esterase domain containing 1A	ENSMUSG00000037773	408.104	0.071769	0.0505394	1.42006	0.15559	0.999135
80743	Vps16	VSP16 CORVET/HOPS core subunit	ENSMUSG00000027411	1299.49	-0.00645136	0.0444568	-0.145115	0.88462	0.999135
19262	Ptpra	protein tyrosine phosphatase, receptor type, A	ENSMUSG00000027303	6473.84	-0.0316512	0.0306487	-1.03271	0.30174	0.999135
99045	Mrps26	mitochondrial ribosomal protein S26	ENSMUSG00000037740	939.068	-0.00921772	0.0468411	-0.196787	0.843994	0.999135
140629	Ubox5	U box domain containing 5	ENSMUSG00000027300	363.817	0.00862713	0.0504074	0.171148	0.864107	0.999135
77006	Ddrgk1	DDRGK domain containing 1	ENSMUSG00000068290	581.655	-0.0232937	0.0502055	-0.463966	0.642672	0.999135
16434	Itpa	inosine triphosphatase (nucleoside triphosphate pyrophosphatase)	ENSMUSG00000074797	1103.75	-0.0234049	0.0456882	-0.512274	0.608459	0.999135
11990	Atrn	attractin	ENSMUSG00000027312	9731.8	0.00845777	0.0290378	0.291268	0.770847	0.999135
14588	Gfra4	glial cell line derived neurotrophic factor family receptor alpha 4	ENSMUSG00000027316	937.049	-0.0182762	0.0476214	-0.383781	0.701141	0.999135
67326	1700037H04Rik	RIKEN cDNA 1700037H04 gene	ENSMUSG00000027327	969.525	0.0184903	0.046221	0.40004	0.689127	0.999135
12616	Cenpb	centromere protein B	ENSMUSG00000068267	2657.7	0.0221797	0.0371525	0.596992	0.550513	0.999135
74450	Pank2	pantothenate kinase 2	ENSMUSG00000037514	1116.93	-0.0130404	0.0449855	-0.289879	0.771909	0.999135
51902	Rnf24	ring finger protein 24	ENSMUSG00000048911	822.706	0.0190015	0.0481588	0.394559	0.693169	0.999135
19122	Prnp	prion protein	ENSMUSG00000079037	22330.3	-0.0124329	0.0329385	-0.377457	0.705834	0.999135
54338	Slc23a2	solute carrier family 23 (nucleobase transporters), member 2	ENSMUSG00000027340	3728.07	0.0220732	0.03445	0.64073	0.521698	0.999135
70612	Tmem230	transmembrane protein 230	ENSMUSG00000027341	332.212	-0.017414	0.0499466	-0.348652	0.727351	0.999135
18538	Pcna	proliferating cell nuclear antigen	ENSMUSG00000027342	674.966	-0.00133528	0.0496166	-0.0269119	0.97853	0.999135
110911	Cds2	CDP-diacylglycerol synthase (phosphatidate cytidylyltransferase) 2	ENSMUSG00000058793	16593.6	0.0277795	0.0304588	0.912035	0.36175	0.999135
246313	Prokr2	prokineticin receptor 2	ENSMUSG00000050558	407.126	0.0554232	0.0505429	1.09656	0.272835	0.999135
74182	Gpcpd1	glycerophosphocholine phosphodiesterase 1	ENSMUSG00000027346	4381.51	0.0121285	0.035772	0.339051	0.734572	0.999135
66926	Trmt6	tRNA methyltransferase 6	ENSMUSG00000037376	737.768	-0.0224103	0.0486109	-0.461014	0.644788	0.999135
66586	Crls1	cardiolipin synthase 1	ENSMUSG00000027357	904.649	-0.0227777	0.0464014	-0.490883	0.623509	0.999135
52837	Tmx4	thioredoxin-related transmembrane protein 4	ENSMUSG00000034723	7384.04	0.0211133	0.0325115	0.64941	0.516074	0.999135
18795	Plcb1	phospholipase C, beta 1	ENSMUSG00000051177	10246.1	-0.023874	0.0301156	-0.792746	0.427926	0.999135
18798	Plcb4	phospholipase C, beta 4	ENSMUSG00000039943	393.282	0.0579901	0.0500844	1.15785	0.246926	0.999135
241656	Pak7	p21 protein (Cdc42/Rac)-activated kinase 7	ENSMUSG00000039913	1106.07	0.0156213	0.0448071	0.348634	0.727364	0.999135
228662	Btbd3	BTB (POZ) domain containing 3	ENSMUSG00000062098	5591.65	-0.0284005	0.0335304	-0.847005	0.396992	0.999135
75812	Tasp1	taspase, threonine aspartase 1	ENSMUSG00000039033	784.581	-0.0103291	0.0484832	-0.213045	0.831292	0.999135
66580	Esf1	ESF1 nucleolar pre-rRNA processing protein homolog	ENSMUSG00000045624	853.259	0.0108383	0.047584	0.227772	0.819823	0.999135
69487	Ndufaf5	NADH dehydrogenase (ubiquinone) complex I, assembly factor 5	ENSMUSG00000027384	511.955	0.0623792	0.0500648	1.24597	0.212776	0.999135
72899	Macrod2	MACRO domain containing 2	ENSMUSG00000068205	1960.4	0.0188282	0.0401929	0.468446	0.639465	0.999135
71436	Flrt3	fibronectin leucine rich transmembrane protein 3	ENSMUSG00000051379	1222.61	-0.0692942	0.0453366	-1.52844	0.126403	0.999135
20639	Snrpb2	U2 small nuclear ribonucleoprotein B	ENSMUSG00000008333	564.516	0.00348712	0.0496871	0.0701816	0.944049	0.999135
18549	Pcsk2	proprotein convertase subtilisin/kexin type 2	ENSMUSG00000027419	15071	-0.0017345	0.0297515	-0.0582995	0.95351	0.999135
56431	Dstn	destrin	ENSMUSG00000015932	5095.71	0.00697111	0.0315745	0.220783	0.825262	0.999135
81910	Rrbp1	ribosome binding protein 1	ENSMUSG00000027422	466.678	0.0604612	0.050277	1.20256	0.229146	0.999135
69178	Snx5	sorting nexin 5	ENSMUSG00000027423	658.731	0.045517	0.0491246	0.926563	0.354153	0.999135
228714	Kat14	lysine acetyltransferase 14	ENSMUSG00000027425	788.825	0.0638939	0.0482316	1.32473	0.18526	0.999135
70408	Polr3f	polymerase (RNA) III (DNA directed) polypeptide F	ENSMUSG00000027427	544.22	-0.065229	0.0497409	-1.31138	0.189731	0.999135
26450	Rbbp9	retinoblastoma binding protein 9, serine hydrolase	ENSMUSG00000027428	449.486	-0.0373815	0.0502638	-0.743705	0.457055	0.999135
27054	Sec23b	SEC23 homolog B, COPII coat complex component	ENSMUSG00000027429	1119.29	0.00526012	0.0455634	0.115446	0.908092	0.999135
66044	Dtd1	D-tyrosyl-tRNA deacylase 1	ENSMUSG00000027430	788.486	0.0185482	0.0479127	0.387125	0.698663	0.999135
94249	Slc24a3	solute carrier family 24 (sodium/potassium/calcium exchanger), member 3	ENSMUSG00000063873	10858.6	0.016104	0.0310353	0.518893	0.603836	0.999135
67877	Naa20	N(alpha)-acetyltransferase 20, NatB catalytic subunit	ENSMUSG00000002728	735.442	0.0152687	0.0482551	0.316417	0.751686	0.999135
66877	Crnkl1	crooked neck pre-mRNA splicing factor 1	ENSMUSG00000001767	500.517	-0.000885766	0.0503589	-0.0175891	0.985967	0.999135
241694	Ralgapa2	Ral GTPase activating protein, alpha subunit 2 (catalytic)	ENSMUSG00000037110	353.235	0.0184497	0.0505869	0.364714	0.715325	0.999135
24128	Xrn2	5'-3' exoribonuclease 2	ENSMUSG00000027433	1631.79	-0.027008	0.0417739	-0.646529	0.517937	0.999135
20608	Sstr4	somatostatin receptor 4	ENSMUSG00000037014	841.016	-0.0526715	0.0497726	-1.05824	0.289945	0.999135
74533	Gzf1	GDNF-inducible zinc finger protein 1	ENSMUSG00000027439	1021.06	-0.0105479	0.0475016	-0.222054	0.824272	0.999135
17957	Napb	N-ethylmaleimide sensitive fusion protein attachment protein beta	ENSMUSG00000027438	26579.1	0.0385805	0.0266099	1.44986	0.147098	0.999135
13010	Cst3	cystatin C	ENSMUSG00000027447	2176.68	0.00428701	0.0426578	0.100498	0.919949	0.999135
433485	Syndig1	synapse differentiation inducing 1	ENSMUSG00000074736	1264.41	-0.0405424	0.0444759	-0.91156	0.362	0.999135
71881	Apmap	adipocyte plasma membrane associated protein	ENSMUSG00000033096	1418.23	-0.042257	0.0433546	-0.974682	0.329718	0.999135
12497	Entpd6	ectonucleoside triphosphate diphosphohydrolase 6	ENSMUSG00000033068	2829.03	0.0184663	0.0365568	0.50514	0.61346	0.999135
76192	Abhd12	abhydrolase domain containing 12	ENSMUSG00000032046	5622.99	0.00952193	0.0342542	0.277979	0.781029	0.999135
386649	Nsfl1c	NSFL1 (p97) cofactor (p47)	ENSMUSG00000027455	2218.09	0.0532863	0.039635	1.34442	0.178811	0.999135
14225	Fkbp1a	FK506 binding protein 1a	ENSMUSG00000032966	18576.9	0.0093353	0.032832	0.284335	0.776153	0.999135
241727	Snph	syntaphilin	ENSMUSG00000027457	13242.9	-0.0258934	0.031765	-0.815154	0.414984	0.999135
228769	Psmf1	proteasome (prosome, macropain) inhibitor subunit 1	ENSMUSG00000032869	897.732	0.0402753	0.047296	0.851559	0.394459	0.999135
545474	Scrt2	scratch family zinc finger 2	ENSMUSG00000060257	1015.99	-0.0173404	0.048063	-0.360784	0.718261	0.999135
76650	Srxn1	sulfiredoxin 1 homolog (S. cerevisiae)	ENSMUSG00000032802	1772.68	-0.0439752	0.0404564	-1.08698	0.277047	0.999135
12995	Csnk2a1	casein kinase 2, alpha 1 polypeptide	ENSMUSG00000074698	2815.46	0.0411615	0.0361975	1.13714	0.255482	0.999135
67231	Tbc1d20	TBC1 domain family, member 20	ENSMUSG00000027465	1172.08	0.0302565	0.0448811	0.674148	0.500217	0.999135
24105	Rbck1	RanBP-type and C3HC4-type zinc finger containing 1	ENSMUSG00000027466	1122.01	0.0668711	0.0468355	1.42779	0.153353	0.999135
228777	Nrsn2	neurensin 2	ENSMUSG00000059361	965.374	0.0164027	0.0480064	0.341678	0.732594	0.999135
20667	Sox12	SRY (sex determining region Y)-box 12	ENSMUSG00000051817	661.518	-0.0150224	0.0496578	-0.302518	0.762257	0.999135
14950	H13	histocompatibility 13	ENSMUSG00000019188	1631.57	0.0175472	0.0430181	0.407903	0.683345	0.999135
12048	Bcl2l1	BCL2-like 1	ENSMUSG00000007659	2948.75	0.0421793	0.0376339	1.12078	0.262382	0.999135
99237	Tm9sf4	transmembrane 9 superfamily protein member 4	ENSMUSG00000068040	2482.91	-0.024694	0.0388303	-0.635949	0.52481	0.999135
241732	Tspyl3	TSPY-like 3	ENSMUSG00000074671	1228.01	0.00517295	0.0457285	0.113123	0.909933	0.999135
140484	Pofut1	protein O-fucosyltransferase 1	ENSMUSG00000046020	387.673	0.0212175	0.0505993	0.419324	0.674979	0.999135
16569	Kif3b	kinesin family member 3B	ENSMUSG00000027475	4323.24	-0.00475364	0.0356926	-0.133183	0.894049	0.999135
228790	Asxl1	additional sex combs like 1	ENSMUSG00000042548	1197.93	0.0181725	0.0446682	0.406834	0.68413	0.999135
329540	Nol4l	nucleolar protein 4-like	ENSMUSG00000061411	3045.38	0.0223615	0.0360681	0.619982	0.53527	0.999135
99311	Commd7	COMM domain containing 7	ENSMUSG00000056941	488.652	0.0193108	0.0501758	0.384862	0.700339	0.999135
20648	Snta1	syntrophin, acidic 1	ENSMUSG00000027488	683.824	-0.0174083	0.0491995	-0.353831	0.723466	0.999135
12396	Cbfa2t2	core-binding factor, runt domain, alpha subunit 2, translocated to, 2 (human)	ENSMUSG00000038533	1724.3	-0.0245263	0.041378	-0.592738	0.553356	0.999135
59038	Pxmp4	peroxisomal membrane protein 4	ENSMUSG00000000876	371.404	-0.0379074	0.0505992	-0.749171	0.453754	0.999135
228807	Zfp341	zinc finger protein 341	ENSMUSG00000059842	437.736	0.0426217	0.0503935	0.845778	0.397677	0.999135
75608	Chmp4b	charged multivesicular body protein 4B	ENSMUSG00000038467	3196.22	-0.0113227	0.0382028	-0.296383	0.766937	0.999135
19383	Raly	hnRNP-associated with lethal yellow	ENSMUSG00000027593	1554.07	0.0298707	0.0420719	0.709992	0.477709	0.999135
67204	Eif2s2	eukaryotic translation initiation factor 2, subunit 2 (beta)	ENSMUSG00000074656	1689.84	-0.00664984	0.0408439	-0.162811	0.870667	0.999135
16396	Itch	itchy, E3 ubiquitin protein ligase	ENSMUSG00000027598	1577.09	-0.0278133	0.043332	-0.641864	0.520961	0.999135
67068	Dynlrb1	dynein light chain roadblock-type 1	ENSMUSG00000047459	2034.58	0.0350051	0.0398875	0.877596	0.380163	0.999135
66734	Map1lc3a	microtubule-associated protein 1 light chain 3 alpha	ENSMUSG00000027602	3215.1	-0.024741	0.0355754	-0.695453	0.486771	0.999135
228812	Pigu	phosphatidylinositol glycan anchor biosynthesis, class U	ENSMUSG00000038383	444.467	0.0270817	0.0504901	0.536376	0.591699	0.999135
68728	Trp53inp2	transformation related protein 53 inducible nuclear protein 2	ENSMUSG00000038375	6114.97	0.005094	0.0307601	0.165604	0.868468	0.999135
56406	Ncoa6	nuclear receptor coactivator 6	ENSMUSG00000038369	2744.84	0.0458225	0.038049	1.2043	0.228472	0.999135
207182	Ggt7	gamma-glutamyltransferase 7	ENSMUSG00000027603	3443.74	0.0126035	0.0350446	0.359643	0.719114	0.999135
60525	Acss2	acyl-CoA synthetase short-chain family member 2	ENSMUSG00000027605	976.179	0.00140568	0.0469029	0.0299699	0.976091	0.999135
14854	Gss	glutathione synthetase	ENSMUSG00000027610	386.969	0.00414072	0.0505782	0.0818677	0.934752	0.999135
56407	Trpc4ap	transient receptor potential cation channel, subfamily C, member 4 associated protein	ENSMUSG00000038324	5342.25	-0.0449501	0.0316242	-1.42138	0.155206	0.999135
17391	Mmp24	matrix metallopeptidase 24	ENSMUSG00000027612	2101.71	0.00423173	0.040209	0.105243	0.916183	0.999135
613262	BC029722	cDNA sequence BC029722	ENSMUSG00000074649	1147.1	-0.0236122	0.0458951	-0.514482	0.606915	0.999135
16418	Eif6	eukaryotic translation initiation factor 6	ENSMUSG00000027613	939.428	-0.0370553	0.0472537	-0.784177	0.432936	0.999135
56046	Uqcc1	ubiquinol-cytochrome c reductase complex assembly factor 1	ENSMUSG00000005882	947.558	0.0424041	0.0459265	0.923302	0.35585	0.999135
16328	Cep250	centrosomal protein 250	ENSMUSG00000038241	389.763	0.0210885	0.0505741	0.416983	0.676691	0.999135
66366	Ergic3	ERGIC and golgi 3	ENSMUSG00000005881	1323.44	0.0153966	0.0441967	0.348364	0.727567	0.999135
75710	Rbm12	RNA binding motif protein 12	ENSMUSG00000089824	442.873	-0.0309466	0.0503328	-0.614839	0.538661	0.999135
18041	Nfs1	nitrogen fixation gene 1 (S. cerevisiae)	ENSMUSG00000027618	864.863	0.0193865	0.0473979	0.409017	0.682527	0.999135
170791	Rbm39	RNA binding motif protein 39	ENSMUSG00000027620	3402.76	-0.0304978	0.0362824	-0.840568	0.40059	0.999135
19018	Scand1	SCAN domain-containing 1	ENSMUSG00000046229	750.49	-0.0469476	0.0494493	-0.949408	0.342413	0.999135
68295	Aar2	AAR2 splicing factor homolog	ENSMUSG00000027628	1194.21	0.0219066	0.0454489	0.482005	0.629802	0.999135
228836	Dlgap4	DLG associated protein 4	ENSMUSG00000061689	11333.8	0.0106865	0.0298709	0.357756	0.720526	0.999135
67388	1110008F13Rik	RIKEN cDNA 1110008F13 gene	ENSMUSG00000027637	682.109	-0.0340894	0.0489296	-0.696702	0.485989	0.999135
320706	Soga1	suppressor of glucose, autophagy associated 1	ENSMUSG00000055485	1094.86	-0.0537095	0.0484441	-1.10869	0.267564	0.999135
56045	Samhd1	SAM domain and HD domain, 1	ENSMUSG00000027639	391.237	0.00150161	0.0505773	0.0296894	0.976315	0.999135
20014	Rpn2	ribophorin II	ENSMUSG00000027642	3077.91	0.00505828	0.0380702	0.132867	0.894298	0.999135
69161	Manbal	mannosidase, beta A, lysosomal-like	ENSMUSG00000063019	755.612	-0.0452336	0.0485326	-0.932024	0.351324	0.999135
53619	Blcap	bladder cancer associated protein	ENSMUSG00000067787	2244.01	-0.0200955	0.0385253	-0.521618	0.601936	0.999135
66642	Ctnnbl1	catenin, beta like 1	ENSMUSG00000027649	822.957	0.00615653	0.0484539	0.127059	0.898893	0.999135
277432	Vstm2l	V-set and transmembrane domain containing 2-like	ENSMUSG00000037843	1871.94	0.0427754	0.0447491	0.955895	0.339125	0.999135
75425	Tti1	TELO2 interacting protein 1	ENSMUSG00000027650	397.361	-0.00904619	0.0505552	-0.178937	0.857987	0.999135
70470	Rprd1b	regulation of nuclear pre-mRNA domain containing 1B	ENSMUSG00000027651	756.786	-0.034186	0.0488861	-0.699299	0.484365	0.999135
319317	Snhg11	small nucleolar RNA host gene 11	ENSMUSG00000044349	1580.31	0.0171713	0.0368791	0.465611	0.641494	0.999135
228850	Ralgapb	Ral GTPase activating protein, beta subunit (non-catalytic)	ENSMUSG00000027652	3199.49	-0.0250521	0.036293	-0.690273	0.490022	0.999135
228852	Ppp1r16b	protein phosphatase 1, regulatory (inhibitor) subunit 16B	ENSMUSG00000037754	2208.75	-0.0428253	0.040325	-1.062	0.288235	0.999135
21969	Top1	topoisomerase (DNA) I	ENSMUSG00000070544	3045.33	-0.044699	0.0358939	-1.24531	0.213018	0.999135
18803	Plcg1	phospholipase C, gamma 1	ENSMUSG00000016933	1939.61	-0.0316898	0.0393639	-0.805048	0.420792	0.999135
320799	Zhx3	zinc fingers and homeoboxes 3	ENSMUSG00000035877	2249.67	0.0207282	0.04162	0.498036	0.618459	0.999135
71389	Chd6	chromodomain helicase DNA binding protein 6	ENSMUSG00000057133	1752.9	0.0268	0.041474	0.646188	0.518157	0.999135
67996	Srsf6	serine/arginine-rich splicing factor 6	ENSMUSG00000016921	1594.81	0.0293295	0.0453106	0.6473	0.517438	0.999135
245866	Ift52	intraflagellar transport 52	ENSMUSG00000017858	472.269	-0.00688521	0.0505389	-0.136236	0.891635	0.999135
269389	Tox2	TOX high mobility group box family member 2	ENSMUSG00000074607	851.552	0.0681556	0.0489419	1.39258	0.163746	0.999135
228858	Gdap1l1	ganglioside-induced differentiation-associated protein 1-like 1	ENSMUSG00000017943	2950.3	0.00419022	0.0361859	0.115797	0.907813	0.999135
228859	Fitm2	fat storage-inducing transmembrane protein 2	ENSMUSG00000048486	886.58	-0.0582879	0.0468145	-1.24508	0.213102	0.999135
76080	Ttpal	tocopherol (alpha) transfer protein-like	ENSMUSG00000017679	1828.75	0.0169877	0.0407457	0.416921	0.676736	0.999135
26943	Serinc3	serine incorporator 3	ENSMUSG00000017707	6202.45	-0.00904613	0.0346018	-0.261435	0.793757	0.999135
18769	Pkig	protein kinase inhibitor, gamma	ENSMUSG00000035268	484.555	0.0458284	0.0502424	0.912147	0.361691	0.999135
241770	Rims4	regulating synaptic membrane exocytosis 4	ENSMUSG00000035226	2529.15	-0.0254777	0.041593	-0.612548	0.540175	0.999135
54401	Ywhab	tyrosine 3-monooxygenase/tryptophan 5-monooxygenase activation protein, beta polypeptide	ENSMUSG00000018326	26398.6	0.0331512	0.0270151	1.22714	0.219771	0.999135
67145	Tomm34	translocase of outer mitochondrial membrane 34	ENSMUSG00000018322	2368.26	0.0456973	0.0437811	1.04377	0.296593	0.999135
58231	Stk4	serine/threonine kinase 4	ENSMUSG00000018209	1794.73	-0.0163594	0.04183	-0.391094	0.695728	0.999135
16538	Kcns1	K+ voltage-gated channel, subfamily S, 1	ENSMUSG00000040164	436.494	-0.0456428	0.0504686	-0.904379	0.365794	0.999135
52840	Dbndd2	dysbindin (dystrobrevin binding protein 1) domain containing 2	ENSMUSG00000017734	879.581	-0.0294956	0.0500449	-0.589383	0.555605	0.999135
76233	Dnttip1	deoxynucleotidyltransferase, terminal, interacting protein 1	ENSMUSG00000017299	473.958	-0.00100097	0.0502076	-0.0199366	0.984094	0.999135
101113	Snx21	sorting nexin family member 21	ENSMUSG00000050373	558.358	0.0242184	0.0499509	0.484844	0.627787	0.999135
67538	Zswim3	zinc finger SWIM-type containing 3	ENSMUSG00000045822	323.508	-0.00341032	0.0501523	-0.0679993	0.945786	0.999135
71971	Zswim1	zinc finger SWIM-type containing 1	ENSMUSG00000017764	798.8	0.00484498	0.0477146	0.101541	0.919121	0.999135
19025	Ctsa	cathepsin A	ENSMUSG00000017760	1842.94	-0.0284254	0.0423583	-0.67107	0.502176	0.999135
228866	Pcif1	PDX1 C-terminal inhibiting factor 1	ENSMUSG00000039849	1116.79	0.00824809	0.0443595	0.185938	0.852494	0.999135
329559	Zfp335	zinc finger protein 335	ENSMUSG00000039834	750.623	0.0266137	0.0483626	0.550295	0.582117	0.999135
57138	Slc12a5	solute carrier family 12, member 5	ENSMUSG00000017740	21046.6	-0.0276021	0.0252936	-1.09127	0.275156	0.999135
228869	Ncoa5	nuclear receptor coactivator 5	ENSMUSG00000039804	1595.33	-0.0139942	0.043315	-0.32308	0.746635	0.999135
104010	Cdh22	cadherin 22	ENSMUSG00000053166	567.026	0.0189881	0.0502201	0.378098	0.705358	0.999135
228875	Slc35c2	solute carrier family 35, member C2	ENSMUSG00000017664	1198.49	-0.0139789	0.0456718	-0.306073	0.759549	0.999135
140579	Elmo2	engulfment and cell motility 2	ENSMUSG00000017670	6855.18	-0.0275377	0.0336689	-0.817897	0.413416	0.999135
228876	Zfp334	zinc finger protein 334	ENSMUSG00000017667	545.364	-0.0232697	0.0502931	-0.462682	0.643592	0.999135
277360	Prex1	phosphatidylinositol-3,4,5-trisphosphate-dependent Rac exchange factor 1	ENSMUSG00000039621	1815.6	0.011797	0.043311	0.272378	0.785331	0.999135
99371	Arfgef2	ADP-ribosylation factor guanine nucleotide-exchange factor 2 (brefeldin A-inhibited)	ENSMUSG00000074582	1731.17	-0.00844092	0.0433344	-0.194785	0.845561	0.999135
110750	Cse1l	chromosome segregation 1-like (S. cerevisiae)	ENSMUSG00000002718	2017.72	-0.0539244	0.0407749	-1.32249	0.186004	0.999135
20853	Stau1	staufen double-stranded RNA binding protein 1	ENSMUSG00000039536	1996.05	0.0356629	0.0406543	0.877222	0.380366	0.999135
228889	Ddx27	DEAD (Asp-Glu-Ala-Asp) box polypeptide 27	ENSMUSG00000017999	619.814	0.0715054	0.0491869	1.45375	0.146016	0.999135
98999	Znfx1	zinc finger, NFX1-type containing 1	ENSMUSG00000039501	766.694	-0.0716968	0.0488856	-1.46662	0.142478	0.999135
16500	Kcnb1	potassium voltage gated channel, Shab-related subfamily, member 1	ENSMUSG00000050556	4033.74	0.0473416	0.035412	1.33688	0.181262	0.999135
56336	B4galt5	UDP-Gal:betaGlcNAc beta 1,4-galactosyltransferase, polypeptide 5	ENSMUSG00000017929	1601.97	0.0417422	0.0419638	0.994719	0.319873	0.999135
77031	Slc9a8	solute carrier family 9 (sodium/hydrogen exchanger), member 8	ENSMUSG00000039463	879.38	-0.0104969	0.0468818	-0.223901	0.822834	0.999135
263876	Spata2	spermatogenesis associated 2	ENSMUSG00000047030	2348.78	-0.00390443	0.0388307	-0.10055	0.919908	0.999135
81018	Rnf114	ring finger protein 114	ENSMUSG00000006418	699.623	0.0647896	0.0488555	1.32615	0.18479	0.999135
407243	Tmem189	transmembrane protein 189	ENSMUSG00000090213	938.411	0.0325586	0.0473023	0.688309	0.491258	0.999135
19246	Ptpn1	protein tyrosine phosphatase, non-receptor type 1	ENSMUSG00000027540	2164.12	-0.00367163	0.0406956	-0.0902218	0.928111	0.999135
69372	Mocs3	molybdenum cofactor synthesis 3	ENSMUSG00000074576	381.483	-0.028896	0.0505632	-0.571482	0.567673	0.999135
241794	Kcng1	potassium voltage-gated channel, subfamily G, member 1	ENSMUSG00000074575	3194.03	-0.0100592	0.0403234	-0.249463	0.803003	0.999135
18019	Nfatc2	nuclear factor of activated T cells, cytoplasmic, calcineurin dependent 2	ENSMUSG00000027544	671.781	0.00741933	0.0486399	0.152536	0.878764	0.999135
11981	Atp9a	ATPase, class II, type 9A	ENSMUSG00000027546	14860.8	-0.0233714	0.0280178	-0.834164	0.404188	0.999135
22722	Zfp64	zinc finger protein 64	ENSMUSG00000027551	420.21	0.0132646	0.0504262	0.263049	0.792513	0.999135
228911	Tshz2	teashirt zinc finger family member 2	ENSMUSG00000047907	1163.3	0.048486	0.0401629	1.20723	0.227342	0.999135
67017	Fam210b	family with sequence similarity 210, member B	ENSMUSG00000027495	912.932	0.0314626	0.0465177	0.676357	0.498814	0.999135
67337	Cstf1	cleavage stimulation factor, 3' pre-RNA, subunit 1	ENSMUSG00000027498	775.15	-0.0482491	0.0485908	-0.992968	0.320726	0.999135
66404	Rtfdc1	replication termination factor 2 domain containing 1	ENSMUSG00000027502	2126.79	-0.0490561	0.0416335	-1.17829	0.238683	0.999135
66679	Rae1	ribonucleic acid export 1	ENSMUSG00000027509	1445.33	0.00177849	0.0438422	0.0405656	0.967642	0.999135
65112	Pmepa1	prostate transmembrane protein, androgen induced 1	ENSMUSG00000038400	781.32	-0.0270378	0.0488627	-0.553341	0.58003	0.999135
56491	Vapb	vesicle-associated membrane protein, associated protein B and C	ENSMUSG00000054455	3273.45	-0.00228469	0.0359063	-0.0636293	0.949265	0.999135
228960	Stx16	syntaxin 16	ENSMUSG00000027522	1513.93	-0.00803573	0.0423264	-0.189852	0.849425	0.999135
14683	Gnas	GNAS (guanine nucleotide binding protein, alpha stimulating) complex locus	ENSMUSG00000027523	39116.4	-0.039794	0.0318527	-1.24931	0.211551	0.999135
57314	Nelfcd	negative elongation factor complex member C/D, Th1l	ENSMUSG00000016253	1409.4	0.00574707	0.0435308	0.132023	0.894966	0.999135
66390	Prelid3b	PRELI domain containing 3B	ENSMUSG00000016257	776.706	-0.0250285	0.0481041	-0.520299	0.602855	0.999135
100043757	Zfp831	zinc finger protein 831	ENSMUSG00000050600	1066.8	0.00696915	0.046817	0.148859	0.881665	0.999135
74189	Phactr3	phosphatase and actin regulator 3	ENSMUSG00000027525	2526.46	0.0576175	0.038029	1.5151	0.129748	0.999135
71532	Fam217b	family with sequence similarity 217, member B	ENSMUSG00000070476	1657.23	0.0279247	0.0437944	0.637631	0.523714	0.999135
12561	Cdh4	cadherin 4	ENSMUSG00000000305	437.919	-0.0015085	0.0503482	-0.0299614	0.976098	0.999135
228980	Taf4	TATA-box binding protein associated factor 4	ENSMUSG00000039117	340.04	0.0572488	0.0505762	1.13193	0.257663	0.999135
[truncated: 53,198 more rows]

## Sheet: All DEGs
ENTREZID	SYMBOL	GENENAME	GeneID	Base mean	log2(FC)	StdErr	Wald-Stats	pvalue	padj
16476	Jun	jun proto-oncogene	ENSMUSG00000052684	3222.07	-0.346339	0.0352668	-9.82056	9.18286e-23	7.52535e-19
56471	Stmn4	stathmin-like 4	ENSMUSG00000022044	8092.25	-0.263065	0.0300699	-8.74843	2.16338e-18	8.86445e-15
27387	Sh2d3c	SH2 domain containing 3C	ENSMUSG00000059013	809.04	-0.29818	0.0473657	-6.29526	3.06879e-10	8.3829e-07
26558	Homer3	homer scaffolding protein 3	ENSMUSG00000003573	1865.45	-0.22524	0.0438473	-5.13692	2.79272e-07	0.000572159
140743	Rem2	rad and gem related GTP binding protein 2	ENSMUSG00000022176	1257.95	-0.228624	0.0450405	-5.07596	3.85547e-07	0.000631912
23965	Tenm3	teneurin transmembrane protein 3	ENSMUSG00000031561	3783.9	0.191862	0.0381168	5.03353	4.81525e-07	0.000657683
213783	Plekhg1	pleckstrin homology domain containing, family G (with RhoGef domain) member 1	ENSMUSG00000040624	1135.44	-0.240414	0.0493231	-4.87427	1.09212e-06	0.00111875
18111	Nnat	neuronatin	ENSMUSG00000067786	15941.8	-0.151469	0.0310221	-4.88261	1.04689e-06	0.00111875
16478	Jund	jun D proto-oncogene	ENSMUSG00000071076	3059.93	-0.171676	0.0382049	-4.49356	7.00429e-06	0.00441539
26404	Map3k12	mitogen-activated protein kinase kinase kinase 12	ENSMUSG00000023050	3607.65	-0.154412	0.034247	-4.50878	6.52026e-06	0.00441539
21912	Tspan7	tetraspanin 7	ENSMUSG00000058254	16302.4	-0.120934	0.0268023	-4.5121	6.41901e-06	0.00441539
76161	Lamp5	lysosomal-associated membrane protein family, member 5	ENSMUSG00000027270	513.622	0.226143	0.050318	4.49427	6.98103e-06	0.00441539
320554	Tcp11l1	t-complex 11 like 1	ENSMUSG00000027175	490.516	0.229425	0.0503913	4.55287	5.29179e-06	0.00441539
27008	Micall1	microtubule associated monooxygenase, calponin and LIM domain containing -like 1	ENSMUSG00000033039	943.003	0.221804	0.0495752	4.47408	7.67396e-06	0.00449201
226562	Prrc2c	proline-rich coiled-coil 2C	ENSMUSG00000040225	4111.75	0.14018	0.0331036	4.23459	2.2897e-05	0.0125094
11834	Aqr	aquarius	ENSMUSG00000040383	699.177	-0.207321	0.0497052	-4.17102	3.03238e-05	0.0146661
238323	Rps6kl1	ribosomal protein S6 kinase-like 1	ENSMUSG00000019235	1691.6	-0.173305	0.0416716	-4.15884	3.19872e-05	0.0146661
11789	Apc	adenomatosis polyposis coli	ENSMUSG00000005871	13045	0.122837	0.0295479	4.15723	3.22135e-05	0.0146661
50918	Myadm	myeloid-associated differentiation marker	ENSMUSG00000068566	8682.12	-0.140305	0.0340756	-4.11747	3.83059e-05	0.0162985
22129	Ttc3	tetratricopeptide repeat domain 3	ENSMUSG00000040785	17252.8	-0.138925	0.0338119	-4.10877	3.97767e-05	0.0162985
15194	Htt	huntingtin	ENSMUSG00000029104	4253.57	-0.134144	0.0330566	-4.05801	4.94933e-05	0.0193142
18164	Nptx1	neuronal pentraxin 1	ENSMUSG00000025582	25968	-0.118373	0.0295885	-4.00063	6.31749e-05	0.0235327
207596	Thsd4	thrombospondin, type I, domain containing 4	ENSMUSG00000032289	5501.95	-0.155368	0.0394135	-3.94201	8.08012e-05	0.0275902
17754	Map1a	microtubule-associated protein 1 A	ENSMUSG00000027254	33280.4	0.109909	0.027881	3.94207	8.07813e-05	0.0275902
223726	Mpped1	metallophosphoesterase domain containing 1	ENSMUSG00000041708	6526.79	0.121513	0.0312108	3.89331	9.8886e-05	0.0324148
20741	Sptb	spectrin beta, erythrocytic	ENSMUSG00000021061	2672.73	-0.162832	0.0423412	-3.8457	0.00012021	0.0357466
66860	Tanc1	tetratricopeptide repeat, ankyrin repeat and coiled-coil containing 1	ENSMUSG00000035168	3880.68	-0.161416	0.0420375	-3.83981	0.000123132	0.0357466
12444	Ccnd2	cyclin D2	ENSMUSG00000000184	5362.11	-0.160964	0.0419405	-3.83792	0.000124082	0.0357466
67468	Mmd	monocyte to macrophage differentiation-associated	ENSMUSG00000003948	7881.91	-0.125161	0.0326521	-3.83318	0.000126498	0.0357466
73340	Nptxr	neuronal pentraxin receptor	ENSMUSG00000022421	70615.4	-0.0994493	0.0260022	-3.82464	0.000130961	0.0357741
18040	Nefm	neurofilament, medium polypeptide	ENSMUSG00000022054	13898.4	0.12325	0.032545	3.78708	0.000152428	0.0367396
76900	Ssbp4	single stranded DNA binding protein 4	ENSMUSG00000070003	3102.86	0.157951	0.0416337	3.79383	0.00014834	0.0367396
207785	Csrnp2	cysteine-serine-rich nuclear protein 2	ENSMUSG00000044636	1188.68	0.167961	0.0442809	3.79308	0.000148793	0.0367396
20524	Slc25a17	solute carrier family 25 (mitochondrial carrier, peroxisomal membrane protein), member 17	ENSMUSG00000022404	758.287	0.191601	0.0505371	3.79129	0.000149865	0.0367396
12297	Cacnb3	calcium channel, voltage-dependent, beta 3 subunit	ENSMUSG00000003352	5146.19	-0.119332	0.0318811	-3.74304	0.000181808	0.0425691
110637	Grik4	glutamate receptor, ionotropic, kainate 4	ENSMUSG00000032017	2851.48	-0.137544	0.0368929	-3.72819	0.000192857	0.0439018

## Sheet: Upregulated
ENTREZID	SYMBOL	GENENAME	GeneID	Base mean	log2(FC)	StdErr	Wald-Stats	pvalue	padj	Alternative name/Ortholog	Expression patterns based on ABA	CA1	CA3	DG
23965	Tenm3	teneurin transmembrane protein 3	ENSMUSG00000031561	3783.9	0.191862	0.0381168	5.03353	4.81525e-07	0.000657683		CA1 enriched	1	0	0
76161	Lamp5	lysosomal-associated membrane protein family, member 5	ENSMUSG00000027270	513.622	0.226143	0.050318	4.49427	6.98103e-06	0.00441539		CA1 enriched	3	2	1
320554	Tcp11l1	t-complex 11 like 1	ENSMUSG00000027175	490.516	0.229425	0.0503913	4.55287	5.29179e-06	0.00441539		no apparent region differences	1	1	1
27008	Micall1	microtubule associated monooxygenase, calponin and LIM domain containing -like 1	ENSMUSG00000033039	943.003	0.221804	0.0495752	4.47408	7.67396e-06	0.00449201		DG enriched	1	1	2
226562	Prrc2c	proline-rich coiled-coil 2C	ENSMUSG00000040225	4111.75	0.14018	0.0331036	4.23459	2.2897e-05	0.0125094		no apparent region differences	3	3	3
11789	Apc	adenomatosis polyposis coli	ENSMUSG00000005871	13045	0.122837	0.0295479	4.15723	3.22135e-05	0.0146661		no apparent region differences	2	2	2
17754	Map1a	microtubule-associated protein 1 A	ENSMUSG00000027254	33280.4	0.109909	0.027881	3.94207	8.07813e-05	0.0275902		no apparent region differences	3	3	3
223726	Mpped1	metallophosphoesterase domain containing 1	ENSMUSG00000041708	6526.79	0.121513	0.0312108	3.89331	9.8886e-05	0.0324148		CA1 enriched	3	1	1
18040	Nefm	neurofilament, medium polypeptide	ENSMUSG00000022054	13898.4	0.12325	0.032545	3.78708	0.000152428	0.0367396		no apparent region differences	3	3	3
76900	Ssbp4	single stranded DNA binding protein 4	ENSMUSG00000070003	3102.86	0.157951	0.0416337	3.79383	0.00014834	0.0367396		no apparent region differences	3	3	3
207785	Csrnp2	cysteine-serine-rich nuclear protein 2	ENSMUSG00000044636	1188.68	0.167961	0.0442809	3.79308	0.000148793	0.0367396		no apparent region differences	3	3	3
20524	Slc25a17	solute carrier family 25 (mitochondrial carrier, peroxisomal membrane protein), member 17	ENSMUSG00000022404	758.287	0.191601	0.0505371	3.79129	0.000149865	0.0367396		no apparent region differences	2	2	2

## Sheet: Downregulated
ENTREZID	SYMBOL	GENENAME	GeneID	Base mean	log2(FC)	StdErr	Wald-Stats	pvalue	padj	Alternative name/Ortholog	Expression patterns based on ABA	CA1	CA3	DG
16476	Jun	jun proto-oncogene	ENSMUSG00000052684	3222.07	-0.346339	0.0352668	-9.82056	9.18286e-23	7.52535e-19		no apparent region differences	3	3	3
56471	Stmn4	stathmin-like 4	ENSMUSG00000022044	8092.25	-0.263065	0.0300699	-8.74843	2.16338e-18	8.86445e-15		CA1 enriched	3	2	2
27387	Sh2d3c	SH2 domain containing 3C	ENSMUSG00000059013	809.04	-0.29818	0.0473657	-6.29526	3.06879e-10	8.3829e-07		CA3 enriched	1	2	1
26558	Homer3	homer scaffolding protein 3	ENSMUSG00000003573	1865.45	-0.22524	0.0438473	-5.13692	2.79272e-07	0.000572159		CA3 enriched	2	3	2
140743	Rem2	rad and gem related GTP binding protein 2	ENSMUSG00000022176	1257.95	-0.228624	0.0450405	-5.07596	3.85547e-07	0.000631912		CA1 and CA3 enriched	2	2	1
213783	Plekhg1	pleckstrin homology domain containing, family G (with RhoGef domain) member 1	ENSMUSG00000040624	1135.44	-0.240414	0.0493231	-4.87427	1.09212e-06	0.00111875		CA1 enriched	2	0	0
18111	Nnat	neuronatin	ENSMUSG00000067786	15941.8	-0.151469	0.0310221	-4.88261	1.04689e-06	0.00111875		CA3 and DG enriched	1	3	3
16478	Jund	jun D proto-oncogene	ENSMUSG00000071076	3059.93	-0.171676	0.0382049	-4.49356	7.00429e-06	0.00441539		no apparent region differences	3	3	3
26404	Map3k12	mitogen-activated protein kinase kinase kinase 12	ENSMUSG00000023050	3607.65	-0.154412	0.034247	-4.50878	6.52026e-06	0.00441539		no apparent region differences	3	3	3
21912	Tspan7	tetraspanin 7	ENSMUSG00000058254	16302.4	-0.120934	0.0268023	-4.5121	6.41901e-06	0.00441539		no apparent region differences	3	3	3
11834	Aqr	aquarius	ENSMUSG00000040383	699.177	-0.207321	0.0497052	-4.17102	3.03238e-05	0.0146661		no apparent region differences	1	1	1
238323	Rps6kl1	ribosomal protein S6 kinase-like 1	ENSMUSG00000019235	1691.6	-0.173305	0.0416716	-4.15884	3.19872e-05	0.0146661		CA3 enriched	2	3	1
50918	Myadm	myeloid-associated differentiation marker	ENSMUSG00000068566	8682.12	-0.140305	0.0340756	-4.11747	3.83059e-05	0.0162985		CA1 and CA3 enriched	2	2	0
22129	Ttc3	tetratricopeptide repeat domain 3	ENSMUSG00000040785	17252.8	-0.138925	0.0338119	-4.10877	3.97767e-05	0.0162985		no apparent region differences	3	3	3
15194	Htt	huntingtin	ENSMUSG00000029104	4253.57	-0.134144	0.0330566	-4.05801	4.94933e-05	0.0193142		no apparent region differences	2	2	2
18164	Nptx1	neuronal pentraxin 1	ENSMUSG00000025582	25968	-0.118373	0.0295885	-4.00063	6.31749e-05	0.0235327		no apparent region differences	3	3	3
207596	Thsd4	thrombospondin, type I, domain containing 4	ENSMUSG00000032289	5501.95	-0.155368	0.0394135	-3.94201	8.08012e-05	0.0275902		CA1 and CA3 enriched	1	1	0
20741	Sptb	spectrin beta, erythrocytic	ENSMUSG00000021061	2672.73	-0.162832	0.0423412	-3.8457	0.00012021	0.0357466		no apparent region differences	3	3	3
66860	Tanc1	tetratricopeptide repeat, ankyrin repeat and coiled-coil containing 1	ENSMUSG00000035168	3880.68	-0.161416	0.0420375	-3.83981	0.000123132	0.0357466		CA3 and DG enriched	2	3	3
12444	Ccnd2	cyclin D2	ENSMUSG00000000184	5362.11	-0.160964	0.0419405	-3.83792	0.000124082	0.0357466		CA3 enriched	0	3	1
67468	Mmd	monocyte to macrophage differentiation-associated	ENSMUSG00000003948	7881.91	-0.125161	0.0326521	-3.83318	0.000126498	0.0357466		no apparent region differences	3	3	3
73340	Nptxr	neuronal pentraxin receptor	ENSMUSG00000022421	70615.4	-0.0994493	0.0260022	-3.82464	0.000130961	0.0357741		no apparent region differences	3	3	3
12297	Cacnb3	calcium channel, voltage-dependent, beta 3 subunit	ENSMUSG00000003352	5146.19	-0.119332	0.0318811	-3.74304	0.000181808	0.0425691		CA1 and CA3 enriched	3	3	2
110637	Grik4	glutamate receptor, ionotropic, kainate 4	ENSMUSG00000032017	2851.48	-0.137544	0.0368929	-3.72819	0.000192857	0.0439018		CA3 enriched	0	1	0

## Sheet: Synaptic genes
Synaptic gene	Gene Name	Regional Expression	Direction of change
Tenm3	teneurin transmembrane protein 3	CA1 enriched	up
Nefm	neurofilament, medium polypeptide	no apparent region differences	up
Nptxr	neuronal pentraxin receptor	no apparent region differences	down
Nptx1	neuronal pentraxin 1	no apparent region differences	down
Sptb	spectrin beta, erythrocytic	no apparent region differences	down
Tspan7	tetraspanin 7	no apparent region differences	down
Htt	huntingtin	no apparent region differences	down
Homer3	homer scaffolding protein 3	CA3 enriched	down
Grik4	glutamate receptor, ionotropic, kainate 4	CA3 enriched	down
Tanc1	tetratricopeptide repeat, ankyrin repeat and coiled-coil containing 1	CA3 and DG enriched	down
