# Supplementary material for: Translatome analysis reveals cellular network in DLK-dependent hippocampal glutamatergic neuron degeneration
Source: eLife. 2025 Mar 11;13:RP101173. doi: 10.7554/eLife.101173 (PMC11896613; doi:10.7554/eLife.101173)
Supplement: Supplementary file 2. — File containing differential expression results from DLK(iOE) compared to control and their regional enrichment. Highlighted columns show gene symbols of differentially expressed genes (padj <0.05), Log2 fold change, and adjusted p-values. Sheets show genes sorted by all differentially expressed genes, regional expression, upregulated genes, downregulated genes, and synaptic genes. [file elife-101173-supp2.xlsx]

## Sheet: WT vs DLKiOE Ribotag
ENTREZID	SYMBOL	GENENAME	GeneID	Base mean	log2(FC)	StdErr	Wald-Stats	pvalue	padj
26404	Map3k12	mitogen-activated protein kinase kinase kinase 12	ENSMUSG00000023050	10426.2	1.63653	0.0732556	22.34	1.50993e-110	1.93528e-106
16010	Igfbp4	insulin-like growth factor binding protein 4	ENSMUSG00000017493	3208.67	-0.993324	0.0687465	-14.4491	2.54025e-47	1.62792e-43
16476	Jun	jun proto-oncogene	ENSMUSG00000052684	5743.09	0.694441	0.0640659	10.8395	2.23743e-27	9.55904e-24
70686	Dusp16	dual specificity phosphatase 16	ENSMUSG00000030203	265.976	1.02649	0.102801	9.98518	1.76973e-23	5.67066e-20
27387	Sh2d3c	SH2 domain containing 3C	ENSMUSG00000059013	1269.54	0.782581	0.0789831	9.90821	3.8345e-23	9.82935e-20
NA	NA	NA	ENSMUSG00000084349	186.438	-1.03229	0.107362	-9.61501	6.91039e-22	1.47618e-18
56471	Stmn4	stathmin-like 4	ENSMUSG00000022044	12463.9	0.58679	0.0627636	9.3492	8.83115e-21	1.61698e-17
16949	Loxl1	lysyl oxidase-like 1	ENSMUSG00000032334	522.182	0.886821	0.0959193	9.2455	2.34146e-20	3.75131e-17
12062	Bdkrb2	bradykinin receptor, beta 2	ENSMUSG00000021070	109.688	0.957102	0.105759	9.04986	1.43151e-19	2.03863e-16
214855	Arid5a	AT rich interactive domain 5A (MRF1-like)	ENSMUSG00000037447	337.725	0.850101	0.0997778	8.51994	1.59636e-17	2.04606e-14
12123	Hrk	harakiri, BCL2 interacting protein (contains only BH3 domain)	ENSMUSG00000046607	3374.89	0.650782	0.0867644	7.50056	6.35446e-14	7.40411e-11
67445	C1qtnf4	C1q and tumor necrosis factor related protein 4	ENSMUSG00000040794	6358.22	-0.548959	0.074307	-7.38771	1.49375e-13	1.47273e-10
228550	Itpka	inositol 1,4,5-trisphosphate 3-kinase A	ENSMUSG00000027296	8351.91	-0.472075	0.0638659	-7.39165	1.45013e-13	1.47273e-10
54132	Pdlim1	PDZ and LIM domain 1 (elfin)	ENSMUSG00000055044	418.949	0.743131	0.103021	7.21342	5.45653e-13	4.99545e-10
105005	Fam84a	family with sequence similarity 84, member A	ENSMUSG00000020607	2261.23	-0.5404	0.0762551	-7.08673	1.37314e-12	1.1733e-09
232943	Klc3	kinesin light chain 3	ENSMUSG00000040714	132.3	0.752602	0.10745	7.00423	2.48349e-12	1.98943e-09
18791	Plat	plasminogen activator, tissue	ENSMUSG00000031538	1246.37	0.574221	0.0823722	6.97105	3.14575e-12	2.37171e-09
242259	Slc44a5	solute carrier family 44, member 5	ENSMUSG00000028360	1299.57	0.522832	0.0793758	6.58679	4.49422e-11	3.20014e-08
12351	Car4	carbonic anhydrase 4	ENSMUSG00000000805	1265.92	0.497336	0.0775592	6.41234	1.43305e-10	9.66705e-08
70713	Gpr137c	G protein-coupled receptor 137C	ENSMUSG00000049092	950.133	0.522828	0.0818105	6.39072	1.65111e-10	1.05811e-07
76161	Lamp5	lysosomal-associated membrane protein family, member 5	ENSMUSG00000027270	668.891	-0.556314	0.0877493	-6.33981	2.30042e-10	1.3402e-07
NA	Ctxnd1	NA	ENSMUSG00000097789	4371.28	-0.481668	0.0758975	-6.3463	2.20558e-10	1.3402e-07
66297	Pantr1	POU domain, class 3, transcription factor 3 adjacent noncoding transcript 1	ENSMUSG00000060424	513.863	-0.573529	0.0913542	-6.27808	3.42781e-10	1.91018e-07
12308	Calb2	calbindin 2	ENSMUSG00000003657	2580.09	0.440932	0.0707971	6.22811	4.72091e-10	2.52116e-07
276829	Smtnl2	smoothelin-like 2	ENSMUSG00000045667	344.943	0.641621	0.103248	6.21436	5.15356e-10	2.64212e-07
12444	Ccnd2	cyclin D2	ENSMUSG00000000184	6242.12	0.440411	0.0710467	6.19889	5.68628e-10	2.80311e-07
18710	Pik3r3	phosphoinositide-3-kinase regulatory subunit 3	ENSMUSG00000028698	1478.89	0.482688	0.0783069	6.16405	7.09081e-10	3.36604e-07
12367	Casp3	caspase 3	ENSMUSG00000031628	431.515	0.620963	0.101142	6.1395	8.27801e-10	3.78926e-07
13052	Cxadr	coxsackie virus and adenovirus receptor	ENSMUSG00000022865	1404.55	0.503304	0.0822369	6.12017	9.34729e-10	4.13118e-07
21808	Tgfb2	transforming growth factor, beta 2	ENSMUSG00000039239	2636.56	0.474379	0.0779872	6.08278	1.18116e-09	5.04629e-07
12443	Ccnd1	cyclin D1	ENSMUSG00000070348	1278.46	0.477028	0.0787699	6.05597	1.39572e-09	5.77064e-07
74596	Cds1	CDP-diacylglycerol synthase 1	ENSMUSG00000029330	2770.35	-0.46985	0.0788084	-5.96192	2.49285e-09	9.98463e-07
12833	Col6a1	collagen, type VI, alpha 1	ENSMUSG00000001119	425.679	0.56078	0.0968081	5.7927	6.92653e-09	2.69022e-06
399548	Scn4b	sodium channel, type IV, beta	ENSMUSG00000046480	529.774	-0.527645	0.0912569	-5.78197	7.38301e-09	2.78318e-06
14395	Gabra2	gamma-aminobutyric acid (GABA) A receptor, subunit alpha 2	ENSMUSG00000000560	7562.6	0.502596	0.0875361	5.74159	9.37942e-09	3.43474e-06
84004	Mcam	melanoma cell adhesion molecule	ENSMUSG00000032135	200.83	0.599826	0.105765	5.67133	1.41693e-08	5.04467e-06
54139	Irf6	interferon regulatory factor 6	ENSMUSG00000026638	54.4809	0.529744	0.0940163	5.6346	1.75465e-08	6.0782e-06
98970	Fibcd1	fibrinogen C domain containing 1	ENSMUSG00000026841	9710.19	-0.406398	0.0732255	-5.54995	2.8575e-08	8.93283e-06
NA	NA	NA	ENSMUSG00000107272	183.525	-0.593419	0.106904	-5.55098	2.84079e-08	8.93283e-06
18708	Pik3r1	phosphoinositide-3-kinase regulatory subunit 1	ENSMUSG00000041417	3814.36	0.396736	0.0714705	5.55105	2.83963e-08	8.93283e-06
75415	Arhgap12	Rho GTPase activating protein 12	ENSMUSG00000041225	2033.42	-0.439387	0.079151	-5.55125	2.83632e-08	8.93283e-06
13590	Lefty1	left right determination factor 1	ENSMUSG00000038793	305.363	-0.55609	0.101322	-5.48833	4.05746e-08	1.2382e-05
383787	Ankrd63	ankyrin repeat domain 63	ENSMUSG00000078137	1142.69	-0.475472	0.0874362	-5.43793	5.39044e-08	1.60673e-05
18991	Pou3f1	POU domain, class 3, transcription factor 1	ENSMUSG00000090125	3565.93	-0.470021	0.0870821	-5.39744	6.75991e-08	1.96913e-05
15511	Hspa1b	heat shock protein 1B	ENSMUSG00000090877	610.927	0.483818	0.0906262	5.33861	9.36623e-08	2.66771e-05
17155	Man1a	mannosidase 1, alpha	ENSMUSG00000003746	1733.34	-0.411607	0.0798646	-5.15381	2.55244e-07	7.11186e-05
13199	Ddn	dendrin	ENSMUSG00000059213	35590.6	-0.363199	0.070913	-5.12176	3.02702e-07	8.25475e-05
14766	Adgrg1	adhesion G protein-coupled receptor G1	ENSMUSG00000031785	1176.29	0.428788	0.0842142	5.09164	3.54983e-07	9.28533e-05
223726	Mpped1	metallophosphoesterase domain containing 1	ENSMUSG00000041708	6989.75	-0.349236	0.06856	-5.09387	3.5083e-07	9.28533e-05
17260	Mef2c	myocyte enhancer factor 2C	ENSMUSG00000005583	2047.17	-0.445901	0.0877609	-5.08086	3.75734e-07	9.63157e-05
27981	Rsrp1	arginine/serine rich protein 1	ENSMUSG00000037266	3462.65	0.370393	0.073038	5.07123	3.95246e-07	9.93307e-05
11639	Ak4	adenylate kinase 4	ENSMUSG00000028527	3573.36	0.352176	0.0699668	5.03348	4.81668e-07	0.000118722
58869	Pex5l	peroxisomal biogenesis factor 5-like	ENSMUSG00000027674	6024.18	-0.386927	0.077028	-5.02319	5.08191e-07	0.000122404
64074	Smoc2	SPARC related modular calcium binding 2	ENSMUSG00000023886	1156.09	0.405472	0.0807653	5.02038	5.15706e-07	0.000122404
98402	Sh3bp4	SH3-domain binding protein 4	ENSMUSG00000036206	1221.11	-0.427651	0.0853949	-5.00792	5.50203e-07	0.000128217
50723	Icosl	icos ligand	ENSMUSG00000000732	260.638	0.511773	0.102625	4.98683	6.13781e-07	0.000140479
16497	Kcnab1	potassium voltage-gated channel, shaker-related subfamily, beta member 1	ENSMUSG00000027827	3372.73	-0.331368	0.0671586	-4.93411	8.05177e-07	0.000181052
399603	Fam84b	family with sequence similarity 84, member B	ENSMUSG00000072568	365.985	-0.481068	0.0980574	-4.90599	9.29589e-07	0.000205423
19242	Ptn	pleiotrophin	ENSMUSG00000029838	2804.03	-0.334794	0.0685241	-4.88579	1.03017e-06	0.000223791
56338	Txnip	thioredoxin interacting protein	ENSMUSG00000038393	254.08	0.511919	0.104981	4.87628	1.08105e-06	0.000230931
237403	Lingo3	leucine rich repeat and Ig domain containing 3	ENSMUSG00000051067	2179.48	-0.387051	0.079814	-4.84941	1.23828e-06	0.000260181
14580	Gfap	glial fibrillary acidic protein	ENSMUSG00000020932	382.451	0.494825	0.102255	4.83912	1.30418e-06	0.000269609
30806	Adamts8	a disintegrin-like and metallopeptidase (reprolysin type) with thrombospondin type 1 motif, 8	ENSMUSG00000031994	304.556	0.496444	0.103024	4.81871	1.44486e-06	0.00029395
12747	Clk1	CDC-like kinase 1	ENSMUSG00000026034	572.657	0.469024	0.0975357	4.80874	1.51884e-06	0.000304171
67784	Plxnd1	plexin D1	ENSMUSG00000030123	1470.89	-0.435545	0.0909458	-4.78907	1.67558e-06	0.000330398
18530	Pcdh8	protocadherin 8	ENSMUSG00000036422	3626.96	0.339076	0.0711216	4.76756	1.86474e-06	0.000362128
13447	Doc2b	double C2, beta	ENSMUSG00000020848	5134.11	-0.320289	0.0678282	-4.72206	2.33473e-06	0.00044663
353342	Peg13	paternally expressed 13	ENSMUSG00000106847	5894.64	-0.311065	0.0662788	-4.69328	2.68858e-06	0.000506758
106759	Ticam1	toll-like receptor adaptor molecule 1	ENSMUSG00000047123	127.95	0.504859	0.107736	4.68608	2.78487e-06	0.0005173
230784	Sesn2	sestrin 2	ENSMUSG00000028893	1003.78	0.40866	0.0878816	4.65012	3.31734e-06	0.00059885
13717	Eln	elastin	ENSMUSG00000029675	522.296	0.430518	0.0925584	4.65131	3.29838e-06	0.00059885
74012	Rap2b	RAP2B, member of RAS oncogene family	ENSMUSG00000036894	3257.23	-0.309808	0.0668662	-4.63325	3.59969e-06	0.000640795
18611	Pea15a	phosphoprotein enriched in astrocytes 15A	ENSMUSG00000013698	10765.3	0.302635	0.0657386	4.60361	4.15225e-06	0.000707307
232174	Cyp26b1	cytochrome P450, family 26, subfamily b, polypeptide 1	ENSMUSG00000063415	1271.79	-0.377532	0.0819311	-4.60792	4.06715e-06	0.000707307
93688	Klhl1	kelch-like 1	ENSMUSG00000022076	85.5654	0.483807	0.105062	4.60498	4.12499e-06	0.000707307
27367	Rpl3	ribosomal protein L3	ENSMUSG00000060036	6166.58	0.326742	0.0710072	4.60153	4.19406e-06	0.000707307
11303	Abca1	ATP-binding cassette, sub-family A (ABC1), member 1	ENSMUSG00000015243	216.746	0.480908	0.1046	4.5976	4.2739e-06	0.000711411
14812	Grin2b	glutamate receptor, ionotropic, NMDA2B (epsilon 2)	ENSMUSG00000030209	19304.4	-0.376915	0.0828367	-4.55009	5.36226e-06	0.00088113
241514	Zfp804a	zinc finger protein 804A	ENSMUSG00000070866	1002.05	-0.400366	0.0884872	-4.52457	6.05197e-06	0.000981044
72693	Zcchc12	zinc finger, CCHC domain containing 12	ENSMUSG00000036699	792.272	0.396352	0.0876481	4.52208	6.12339e-06	0.000981044
72978	Cnih3	cornichon family AMPA receptor auxiliary protein 3	ENSMUSG00000026514	1783.13	-0.354756	0.0788245	-4.50059	6.77667e-06	0.00106338
11744	Anxa11	annexin A11	ENSMUSG00000021866	1209.69	-0.407222	0.0904988	-4.49975	6.80326e-06	0.00106338
72585	Lypd1	Ly6/Plaur domain containing 1	ENSMUSG00000026344	4175.05	-0.321735	0.0717756	-4.48251	7.37702e-06	0.00112913
216505	Pik3ip1	phosphoinositide-3-kinase interacting protein 1	ENSMUSG00000034614	626.237	0.448908	0.100161	4.48184	7.40009e-06	0.00112913
104582	Rprml	reprimo-like	ENSMUSG00000046215	3874.09	-0.305106	0.0683931	-4.46107	8.15525e-06	0.00122972
66425	Pcp4l1	Purkinje cell protein 4-like 1	ENSMUSG00000038370	238.277	-0.470017	0.105488	-4.45564	8.36422e-06	0.00124656
73340	Nptxr	neuronal pentraxin receptor	ENSMUSG00000022421	88450.3	0.267584	0.0603634	4.43289	9.2979e-06	0.00136978
20501	Slc16a1	solute carrier family 16 (monocarboxylic acid transporters), member 1	ENSMUSG00000032902	1101.36	0.370173	0.0836624	4.4246	9.6621e-06	0.00140726
15564	Htr5b	5-hydroxytryptamine (serotonin) receptor 5B	ENSMUSG00000050534	315.069	-0.461843	0.105254	-4.38789	1.14458e-05	0.00164832
16782	Lamc2	laminin, gamma 2	ENSMUSG00000026479	214.507	0.469796	0.107187	4.38295	1.17085e-05	0.00166742
217944	Rapgef5	Rap guanine nucleotide exchange factor (GEF) 5	ENSMUSG00000041992	5535.03	-0.330872	0.0756333	-4.37468	1.21609e-05	0.00171281
16499	Kcnab3	potassium voltage-gated channel, shaker-related subfamily, beta member 3	ENSMUSG00000018470	347.897	-0.430892	0.0988981	-4.35693	1.31897e-05	0.00181776
98170	Tmem132a	transmembrane protein 132A	ENSMUSG00000024736	14662.6	0.285669	0.0655449	4.35837	1.31034e-05	0.00181776
71685	Galnt14	polypeptide N-acetylgalactosaminyltransferase 14	ENSMUSG00000024064	828.083	0.36593	0.0840748	4.35243	1.34637e-05	0.00183579
140743	Rem2	rad and gem related GTP binding protein 2	ENSMUSG00000022176	1738.95	0.330714	0.0764877	4.32376	1.53392e-05	0.0020695
14735	Gpc4	glypican 4	ENSMUSG00000031119	868.48	-0.376262	0.0872324	-4.31333	1.60815e-05	0.00214704
109050	Fam212b	family with sequence similarity 212, member B	ENSMUSG00000048458	3968.03	-0.292012	0.0678584	-4.30326	1.68303e-05	0.00222385
19736	Rgs4	regulator of G-protein signaling 4	ENSMUSG00000038530	11400.1	0.27916	0.0649097	4.30074	1.70229e-05	0.00222635
51791	Rgs14	regulator of G-protein signaling 14	ENSMUSG00000052087	4262.23	-0.29143	0.0679992	-4.28579	1.82095e-05	0.00235749
67516	Kctd4	potassium channel tetramerisation domain containing 4	ENSMUSG00000046523	2216.56	0.331106	0.0778703	4.25202	2.11855e-05	0.00271535
26558	Homer3	homer scaffolding protein 3	ENSMUSG00000003573	3196.03	0.303388	0.0713899	4.24973	2.14025e-05	0.002716
21834	Thrb	thyroid hormone receptor beta	ENSMUSG00000021779	776.178	-0.382764	0.0901221	-4.24718	2.16482e-05	0.00272025
234577	Cpne2	copine II	ENSMUSG00000034361	1964.18	0.314978	0.0742628	4.24139	2.22138e-05	0.00273763
NA	9930014A18RIK	RIKEN cDNA 9930014A18 gene	ENSMUSG00000097493	125.463	-0.457375	0.107794	-4.24305	2.20499e-05	0.00273763
104418	Dgkz	diacylglycerol kinase zeta	ENSMUSG00000040479	19684.8	-0.286907	0.0681208	-4.21173	2.53418e-05	0.00309338
21885	Tle1	transducin-like enhancer of split 1	ENSMUSG00000008305	1541.21	-0.316482	0.0751962	-4.20875	2.5679e-05	0.00310498
105246	Brd9	bromodomain containing 9	ENSMUSG00000057649	2441.21	-0.29364	0.0699924	-4.19531	2.72494e-05	0.00325505
20524	Slc25a17	solute carrier family 25 (mitochondrial carrier, peroxisomal membrane protein), member 17	ENSMUSG00000022404	716.545	0.368903	0.0879632	4.19383	2.7428e-05	0.00325505
83669	Wdr6	WD repeat domain 6	ENSMUSG00000066357	9490.76	0.309214	0.0740983	4.17302	3.00591e-05	0.00353456
18526	Pcdh10	protocadherin 10	ENSMUSG00000049100	2771.16	-0.299723	0.0718986	-4.1687	3.06346e-05	0.00356949
56349	Net1	neuroepithelial cell transforming gene 1	ENSMUSG00000021215	539.41	-0.413352	0.100097	-4.12954	3.63496e-05	0.00419723
224090	Tmem44	transmembrane protein 44	ENSMUSG00000022537	707.277	-0.371908	0.0904312	-4.11261	3.91214e-05	0.00447696
216795	Wnt9a	wingless-type MMTV integration site family, member 9A	ENSMUSG00000000126	231.69	-0.431788	0.105459	-4.09439	4.23288e-05	0.00480114
235542	Ppp2r3a	protein phosphatase 2, regulatory subunit B'', alpha	ENSMUSG00000043154	685.599	0.349973	0.0858209	4.07795	4.54351e-05	0.00510826
382571	Kcnf1	potassium voltage-gated channel, subfamily F, member 1	ENSMUSG00000051726	3580.5	-0.270643	0.066418	-4.07484	4.60459e-05	0.00513192
101056001	A830036E02Rik	RIKEN cDNA A830036E02 gene	ENSMUSG00000084890	248.313	-0.431951	0.106155	-4.06905	4.72048e-05	0.00521573
238323	Rps6kl1	ribosomal protein S6 kinase-like 1	ENSMUSG00000019235	2643.28	0.293795	0.0724994	4.05237	5.07011e-05	0.00555416
11853	Rhoc	ras homolog family member C	ENSMUSG00000002233	40.4444	0.379135	0.093615	4.04993	5.1232e-05	0.00556476
18111	Nnat	neuronatin	ENSMUSG00000067786	23728.3	0.32471	0.0802788	4.04478	5.23721e-05	0.00564079
12633	Cflar	CASP8 and FADD-like apoptosis regulator	ENSMUSG00000026031	313.178	0.406083	0.100656	4.03437	5.475e-05	0.00584709
170738	Kcnh7	potassium voltage-gated channel, subfamily H (eag-related), member 7	ENSMUSG00000059742	1279.55	-0.336135	0.0833578	-4.03244	5.52e-05	0.00584709
76459	Car12	carbonic anhydrase 12	ENSMUSG00000032373	1666.58	0.314317	0.0785765	4.00014	6.33056e-05	0.00665072
269389	Tox2	TOX high mobility group box family member 2	ENSMUSG00000074607	860.618	-0.332177	0.0831135	-3.99667	6.42396e-05	0.00666696
75985	Rab30	RAB30, member RAS oncogene family	ENSMUSG00000030643	922.751	0.333582	0.0834851	3.99571	6.45005e-05	0.00666696
17919	Myo5b	myosin VB	ENSMUSG00000025885	6765.95	0.280806	0.0704709	3.98471	6.75636e-05	0.0069277
213436	Rtl3	retrotransposon Gag like 3	ENSMUSG00000047686	99.4691	-0.421604	0.106313	-3.96568	7.31874e-05	0.00744479
74718	Snx16	sorting nexin 16	ENSMUSG00000027534	897.396	0.353372	0.0894226	3.95171	7.75963e-05	0.00776994
231605	Galnt9	polypeptide N-acetylgalactosaminyltransferase 9	ENSMUSG00000033316	6216.29	-0.261712	0.0662036	-3.95314	7.71313e-05	0.00776994
23965	Tenm3	teneurin transmembrane protein 3	ENSMUSG00000031561	2768.32	-0.353921	0.0896171	-3.94926	7.8394e-05	0.00778896
81703	Jdp2	Jun dimerization protein 2	ENSMUSG00000034271	891.109	-0.33477	0.0848225	-3.94672	7.92304e-05	0.00781151
14200	Fhl2	four and a half LIM domains 2	ENSMUSG00000008136	1293.87	-0.303084	0.0768713	-3.94275	8.05527e-05	0.00788126
74211	1700017B05Rik	RIKEN cDNA 1700017B05 gene	ENSMUSG00000032300	1102.46	0.359578	0.0912615	3.94009	8.1452e-05	0.00790832
13196	Asap1	ArfGAP with SH3 domain, ankyrin repeat and PH domain1	ENSMUSG00000022377	3706.96	-0.337928	0.0858058	-3.93829	8.20634e-05	0.00790832
320046	F730043M19Rik	RIKEN cDNA F730043M19 gene	ENSMUSG00000052125	843.849	-0.335413	0.0852936	-3.93246	8.40823e-05	0.00804241
15444	Hpca	hippocalcin	ENSMUSG00000028785	70748.3	-0.245104	0.0624009	-3.92789	8.56954e-05	0.00804367
108151	Sema3d	sema domain, immunoglobulin domain (Ig), short basic domain, secreted, (semaphorin) 3D	ENSMUSG00000040254	166.956	0.42213	0.107473	3.92778	8.57342e-05	0.00804367
105244162	Gm39822	predicted gene, 39822	ENSMUSG00000110618	124.841	-0.423296	0.107789	-3.92709	8.59783e-05	0.00804367
56695	Pnkd	paroxysmal nonkinesiogenic dyskinesia	ENSMUSG00000026179	6310.64	-0.255354	0.0655367	-3.89636	9.76506e-05	0.00906947
15118	Has3	hyaluronan synthase 3	ENSMUSG00000031910	207.74	-0.409186	0.105098	-3.89339	9.88515e-05	0.00909689
15551	Htr1b	5-hydroxytryptamine (serotonin) receptor 1B	ENSMUSG00000049511	397.429	-0.371174	0.095365	-3.89214	9.93652e-05	0.00909689
72003	Synpr	synaptoporin	ENSMUSG00000056296	2717.91	0.32757	0.0842145	3.8897	0.000100367	0.00912342
13198	Ddit3	DNA-damage inducible transcript 3	ENSMUSG00000025408	232.456	0.410614	0.10563	3.88729	0.000101371	0.0091423
26559	Hunk	hormonally upregulated Neu-associated kinase	ENSMUSG00000053414	1130.34	-0.329559	0.0848114	-3.88578	0.000102001	0.0091423
218454	Lhfpl2	lipoma HMGIC fusion partner-like 2	ENSMUSG00000045312	880.449	0.330714	0.0853461	3.87497	0.000106637	0.00942601
74199	Vit	vitrin	ENSMUSG00000024076	377.407	-0.375909	0.0969971	-3.87547	0.000106421	0.00942601
108699	Chn1	chimerin 1	ENSMUSG00000056486	42986.8	-0.258421	0.0668247	-3.86715	0.000110114	0.00960088
193740	Hspa1a	heat shock protein 1A	ENSMUSG00000091971	482.79	0.370564	0.0957992	3.86814	0.00010967	0.00960088
233651	Dchs1	dachsous cadherin related 1	ENSMUSG00000036862	405.42	0.391131	0.10127	3.86226	0.000112342	0.009729
15114	Hap1	huntingtin-associated protein 1	ENSMUSG00000006930	5061.58	0.272212	0.0705416	3.85888	0.000113908	0.00979837
18767	Pkia	protein kinase inhibitor, alpha	ENSMUSG00000027499	4779.87	0.303666	0.0788276	3.85227	0.000117026	0.00999945
67468	Mmd	monocyte to macrophage differentiation-associated	ENSMUSG00000003948	10884	0.286919	0.0747748	3.83711	0.000124488	0.0105667
64580	Ndst4	N-deacetylase/N-sulfotransferase (heparin glucosaminyl) 4	ENSMUSG00000027971	687.859	-0.328183	0.0857474	-3.82733	0.000129543	0.0108519
21338	Tacr3	tachykinin receptor 3	ENSMUSG00000028172	175.639	0.407161	0.106361	3.82811	0.000129129	0.0108519
21912	Tspan7	tetraspanin 7	ENSMUSG00000058254	23152	0.237886	0.062325	3.81686	0.000135161	0.0112491
213006	Mfsd4a	major facilitator superfamily domain containing 4A	ENSMUSG00000059149	1422.43	-0.310172	0.0815454	-3.80367	0.000142568	0.011789
74186	Ccdc3	coiled-coil domain containing 3	ENSMUSG00000026676	709.65	-0.350881	0.0923899	-3.79783	0.00014597	0.0119165
242594	Fyb2	FYN binding protein 2	ENSMUSG00000078612	163.562	-0.408001	0.107408	-3.79861	0.000145509	0.0119165
71436	Flrt3	fibronectin leucine rich transmembrane protein 3	ENSMUSG00000051379	1378.85	0.307155	0.0809767	3.79312	0.000148764	0.0120678
106393	Srl	sarcalumenin	ENSMUSG00000022519	697.973	-0.356856	0.0942025	-3.78818	0.000151753	0.0122328
215378	Brinp3	bone morphogenetic protein/retinoic acid inducible neural specific 3	ENSMUSG00000035131	402.906	-0.386721	0.102186	-3.78447	0.000154035	0.0122963
99296	Hrh3	histamine receptor H3	ENSMUSG00000039059	1701.75	-0.307098	0.0811616	-3.78379	0.00015446	0.0122963
NA	A730060N03Rik	RIKEN cDNA A730060N03 gene	ENSMUSG00000092375	83.7471	-0.401001	0.106075	-3.78037	0.000156599	0.0123896
18753	Prkcd	protein kinase C, delta	ENSMUSG00000021948	1381.35	-0.328189	0.0872363	-3.76208	0.000168509	0.0131694
74411	Plpp6	phospholipid phosphatase 6	ENSMUSG00000040105	2331.96	-0.282875	0.0751805	-3.76261	0.000168148	0.0131694
13134	Dach1	dachshund family transcription factor 1	ENSMUSG00000055639	66.6264	-0.383393	0.102318	-3.74706	0.00017892	0.0138983
76820	Fam49a	family with sequence similarity 49, member A	ENSMUSG00000020589	8846.14	-0.247276	0.0661258	-3.73947	0.000184407	0.0142383
72747	Ttc39c	tetratricopeptide repeat domain 39C	ENSMUSG00000024424	1077.61	0.294598	0.078906	3.73353	0.000188813	0.0144912
53376	Usp2	ubiquitin specific peptidase 2	ENSMUSG00000032010	1785.01	-0.311881	0.0836489	-3.72845	0.000192661	0.0146114
67295	Rab3c	RAB3C, member RAS oncogene family	ENSMUSG00000021700	17012	-0.26391	0.0707675	-3.72925	0.000192051	0.0146114
58208	Bcl11b	B cell leukemia/lymphoma 11B	ENSMUSG00000048251	5513.07	-0.269756	0.0725392	-3.71876	0.000200203	0.0150059
11838	Arc	activity regulated cytoskeletal-associated protein	ENSMUSG00000022602	7588.09	-0.245781	0.0660795	-3.71948	0.000199634	0.0150059
14828	Hspa5	heat shock protein 5	ENSMUSG00000026864	12487.3	0.225546	0.0608428	3.70703	0.000209707	0.0156268
78929	Polr3h	polymerase (RNA) III (DNA directed) polypeptide H	ENSMUSG00000022476	789.195	-0.321866	0.0869588	-3.70136	0.000214448	0.0158877
54376	Cacng3	calcium channel, voltage-dependent, gamma subunit 3	ENSMUSG00000066189	1840.62	-0.318902	0.0862107	-3.6991	0.000216369	0.0159379
244954	Prss35	protease, serine 35	ENSMUSG00000033491	770.952	0.324176	0.0876902	3.69683	0.000218311	0.0159891
109205	Sobp	sine oculis binding protein	ENSMUSG00000038248	5188.92	-0.292599	0.0794261	-3.68391	0.000229683	0.0167264
330450	Far2	fatty acyl CoA reductase 2	ENSMUSG00000030303	692.692	-0.324618	0.0885562	-3.66568	0.000246686	0.0178631
NA	4921539H07Rik	RIKEN cDNA 4921539H07 gene	ENSMUSG00000104586	236.635	-0.381003	0.104125	-3.6591	0.000253101	0.0180527
56433	Vps29	VPS29 retromer complex component	ENSMUSG00000029462	3486.77	-0.243607	0.0665835	-3.65867	0.000253529	0.0180527
320405	Cadps2	Ca2+-dependent activator protein for secretion 2	ENSMUSG00000017978	3992.45	-0.244627	0.0668255	-3.66068	0.000251543	0.0180527
16480	Jup	junction plakoglobin	ENSMUSG00000001552	1445.74	0.28886	0.0790272	3.6552	0.000256981	0.0181973
102141	Snx25	sorting nexin 25	ENSMUSG00000038291	1529.77	-0.274528	0.0753123	-3.6452	0.000267187	0.0188161
18563	Pcx	pyruvate carboxylase	ENSMUSG00000024892	1528.49	-0.320449	0.0879786	-3.64234	0.000270166	0.018922
55963	Slc1a4	solute carrier family 1 (glutamate/neutral amino acid transporter), member 4	ENSMUSG00000020142	1831.41	0.276209	0.0759407	3.63717	0.000275654	0.0192014
18993	Pou3f3	POU domain, class 3, transcription factor 3	ENSMUSG00000045515	2111.89	-0.275081	0.0756607	-3.63572	0.000277202	0.0192048
228012	Tlk1	tousled-like kinase 1	ENSMUSG00000041997	2740.58	-0.283228	0.0779541	-3.63327	0.000279851	0.0192842
12798	Cnn2	calponin 2	ENSMUSG00000004665	98.7013	-0.375217	0.103349	-3.63058	0.000282783	0.019382
18164	Nptx1	neuronal pentraxin 1	ENSMUSG00000025582	27437.3	0.240476	0.0663637	3.62361	0.000290514	0.019806
13730	Emp1	epithelial membrane protein 1	ENSMUSG00000030208	33.271	-0.308155	0.0851202	-3.62024	0.000294334	0.0199602
73047	Camk2n2	calcium/calmodulin-dependent protein kinase II inhibitor 2	ENSMUSG00000051146	2396.69	0.336563	0.0930506	3.61698	0.000298055	0.0201061
228942	Cbln4	cerebellin 4 precursor protein	ENSMUSG00000067578	197.173	-0.389575	0.107788	-3.61427	0.0003012	0.0201067
103551	Epop	elongin BC and polycomb repressive complex 2 associated protein	ENSMUSG00000043439	891.068	-0.325704	0.0900942	-3.61515	0.000300178	0.0201067
12476	Cd151	CD151 antigen	ENSMUSG00000025510	189.093	0.383647	0.106423	3.60491	0.000312262	0.0207371
81905	Cacng8	calcium channel, voltage-dependent, gamma subunit 8	ENSMUSG00000053395	7950.8	-0.270614	0.0750999	-3.60339	0.000314092	0.0207511
68497	Arel1	apoptosis resistant E3 ubiquitin protein ligase 1	ENSMUSG00000042350	6013.71	-0.263336	0.0732515	-3.59496	0.000324448	0.0213254
22339	Vegfa	vascular endothelial growth factor A	ENSMUSG00000023951	529.927	0.326816	0.090955	3.59316	0.000326693	0.0213634
67145	Tomm34	translocase of outer mitochondrial membrane 34	ENSMUSG00000018322	3000.25	-0.242291	0.0676683	-3.58058	0.000342839	0.0222187
18160	Npr1	natriuretic peptide receptor 1	ENSMUSG00000027931	95.0395	0.381324	0.106546	3.57895	0.000344973	0.0222187
320495	Ipcef1	interaction protein for cytohesin exchange factors 1	ENSMUSG00000064065	1065.66	-0.340886	0.0952149	-3.58018	0.000343362	0.0222187
213262	Fstl5	follistatin-like 5	ENSMUSG00000034098	1745.32	0.27668	0.077536	3.56841	0.000359148	0.0227881
67220	Plekho1	pleckstrin homology domain containing, family O member 1	ENSMUSG00000015745	360.879	-0.351286	0.098438	-3.5686	0.000358889	0.0227881
14166	Fgf11	fibroblast growth factor 11	ENSMUSG00000042826	828.798	-0.296889	0.0831648	-3.56988	0.000357139	0.0227881
230085	Phf24	PHD finger protein 24	ENSMUSG00000036062	6348.79	-0.259935	0.0729585	-3.56277	0.000366955	0.0231688
114128	Laptm4b	lysosomal-associated protein transmembrane 4B	ENSMUSG00000022257	967.893	0.287377	0.0809458	3.55025	0.000384872	0.0241809
12832	Col5a2	collagen, type V, alpha 2	ENSMUSG00000026042	69.0177	0.357306	0.101045	3.53611	0.000406069	0.0252098
67603	Dusp6	dual specificity phosphatase 6	ENSMUSG00000019960	2843.51	-0.291864	0.0825546	-3.53541	0.000407148	0.0252098
14608	Gpr83	G protein-coupled receptor 83	ENSMUSG00000031932	489.097	0.334412	0.0945752	3.53594	0.000406333	0.0252098
22413	Wnt2	wingless-type MMTV integration site family, member 2	ENSMUSG00000010797	245.549	-0.36383	0.103281	-3.52272	0.000427135	0.0263202
74901	Kbtbd11	kelch repeat and BTB (POZ) domain containing 11	ENSMUSG00000055675	7284.98	-0.295084	0.0839975	-3.513	0.00044307	0.0271715
99633	Adgrl2	adhesion G protein-coupled receptor L2	ENSMUSG00000028184	1370.32	-0.280123	0.0801026	-3.49705	0.000470435	0.0285141
23967	Osr1	odd-skipped related transcription factor 1	ENSMUSG00000048387	234.272	0.368095	0.105252	3.49726	0.000470061	0.0285141
69480	Ttc9	tetratricopeptide repeat domain 9	ENSMUSG00000042734	1254.58	-0.291098	0.0832572	-3.49637	0.000471639	0.0285141
12778	Ackr3	atypical chemokine receptor 3	ENSMUSG00000044337	376.758	0.350039	0.100184	3.49396	0.000475918	0.0285664
15519	Hsp90aa1	heat shock protein 90, alpha (cytosolic), class A member 1	ENSMUSG00000021270	38716	0.220116	0.0630096	3.49337	0.00047696	0.0285664
245386	Tmem255a	transmembrane protein 255A	ENSMUSG00000036502	554.068	0.348894	0.100137	3.48418	0.000493642	0.0294279
223626	Them6	thioesterase superfamily member 6	ENSMUSG00000056665	1225.91	-0.280174	0.0804912	-3.4808	0.000499916	0.029664
12576	Cdkn1b	cyclin-dependent kinase inhibitor 1B	ENSMUSG00000003031	1417.82	0.274814	0.0790391	3.47693	0.000507181	0.0299564
12354	Car7	carbonic anhydrase 7	ENSMUSG00000031883	497.34	-0.324841	0.0934613	-3.47567	0.000509585	0.0299603
18143	Npas2	neuronal PAS domain protein 2	ENSMUSG00000026077	818.169	-0.326195	0.0939385	-3.47243	0.000515773	0.0301857
NA	NA	NA	ENSMUSG00000091421	280.515	-0.369922	0.106638	-3.46895	0.000522495	0.0304255
170770	Bbc3	BCL2 binding component 3	ENSMUSG00000002083	523.905	0.34019	0.0980979	3.46786	0.000524619	0.0304255
384061	Fndc5	fibronectin type III domain containing 5	ENSMUSG00000001334	2337.75	-0.243396	0.0702431	-3.46505	0.000530128	0.0305183
70584	Pak4	p21 protein (Cdc42/Rac)-activated kinase 4	ENSMUSG00000030602	211.261	0.362857	0.104732	3.46462	0.000530982	0.0305183
225288	Fhod3	formin homology 2 domain containing 3	ENSMUSG00000034295	503.503	-0.347435	0.100396	-3.46064	0.00053889	0.0308346
74480	Samd4	sterile alpha motif domain containing 4	ENSMUSG00000021838	386.209	0.350237	0.101355	3.45554	0.0005492	0.0312849
69952	Tunar	Tcl1 upstream neural differentiation associated RNA	ENSMUSG00000097929	854.603	-0.306643	0.0888028	-3.45308	0.000554228	0.0314316
330941	AI593442	expressed sequence AI593442	ENSMUSG00000078307	3665.41	-0.238534	0.0693242	-3.44085	0.000579886	0.0327419
20449	St8sia1	ST8 alpha-N-acetyl-neuraminide alpha-2,8-sialyltransferase 1	ENSMUSG00000030283	1697.71	-0.264631	0.0770992	-3.43235	0.000598383	0.0335886
74747	Ddit4	DNA-damage-inducible transcript 4	ENSMUSG00000020108	2496.78	0.241854	0.0704793	3.43156	0.000600124	0.0335886
66152	Uqcr10	ubiquinol-cytochrome c reductase, complex III subunit X	ENSMUSG00000059534	1765.17	-0.257184	0.0751292	-3.42322	0.000618847	0.0344482
67434	Ankrd33b	ankyrin repeat domain 33B	ENSMUSG00000022237	1592.2	-0.286235	0.0836373	-3.42234	0.000620857	0.0344482
50875	Tmod3	tropomodulin 3	ENSMUSG00000058587	932.898	0.34228	0.100076	3.42022	0.000625711	0.0345678
242083	Ppm1l	protein phosphatase 1 (formerly 2C)-like	ENSMUSG00000027784	4138.76	-0.239588	0.0700979	-3.41791	0.000631034	0.0347123
100502846	Gm19410	predicted gene, 19410	ENSMUSG00000109372	1098.46	0.301957	0.0887424	3.40262	0.000667432	0.0365048
13653	Egr1	early growth response 1	ENSMUSG00000038418	9517.64	-0.223076	0.065575	-3.40185	0.000669316	0.0365048
66895	Pxdc1	PX domain containing 1	ENSMUSG00000021411	214.609	0.36159	0.106823	3.38494	0.000711938	0.0385017
240185	Jcad	junctional cadherin 5 associated	ENSMUSG00000033960	1714.9	-0.296504	0.0875873	-3.38524	0.000711169	0.0385017
19731	Rgl1	ral guanine nucleotide dissociation stimulator,-like 1	ENSMUSG00000026482	3925.3	-0.24697	0.073049	-3.38088	0.000722541	0.0389109
11600	Angpt1	angiopoietin 1	ENSMUSG00000022309	98.677	-0.356765	0.10594	-3.36763	0.000758183	0.0406596
20265	Scn1a	sodium channel, voltage-gated, type I, alpha	ENSMUSG00000064329	1348.19	-0.280928	0.083547	-3.36251	0.000772368	0.0412477
81006	Gpr63	G protein-coupled receptor 63	ENSMUSG00000040372	334.691	-0.349699	0.104213	-3.35562	0.000791881	0.0418352
330319	Wipf3	WAS/WASL interacting protein family, member 3	ENSMUSG00000086040	30685.9	-0.274262	0.0817432	-3.35517	0.000793163	0.0418352
108800	Ston2	stonin 2	ENSMUSG00000020961	275.191	0.349408	0.104085	3.35694	0.000788115	0.0418352
214058	Megf11	multiple EGF-like-domains 11	ENSMUSG00000036466	755.044	0.294431	0.0880223	3.34496	0.000822936	0.0432277
73707	Gucy2g	guanylate cyclase 2g	ENSMUSG00000055523	110.022	-0.356051	0.106516	-3.3427	0.00082969	0.0434046
212531	Sh3bgrl2	SH3 domain binding glutamic acid-rich protein like 2	ENSMUSG00000032261	813.154	-0.288633	0.0864451	-3.33892	0.000841049	0.04382
211586	Tfdp2	transcription factor Dp 2	ENSMUSG00000032411	722.085	-0.29465	0.0882979	-3.33701	0.000846863	0.0439443
12822	Col18a1	collagen, type XVIII, alpha 1	ENSMUSG00000001435	80.8724	0.35075	0.105207	3.33392	0.000856308	0.0442552
12570	Cdk5r2	cyclin-dependent kinase 5, regulatory subunit 2 (p39)	ENSMUSG00000090071	14862.2	-0.291685	0.0875311	-3.33236	0.000861138	0.0443262
67017	Fam210b	family with sequence similarity 210, member B	ENSMUSG00000027495	985.197	-0.274877	0.0827271	-3.32269	0.000891525	0.0456454
19276	Ptprn2	protein tyrosine phosphatase, receptor type, N polypeptide 2	ENSMUSG00000056553	11237.7	-0.26337	0.0792816	-3.32196	0.00089389	0.0456454
58235	Nectin1	nectin cell adhesion molecule 1	ENSMUSG00000032012	4676.29	0.239663	0.0721734	3.32065	0.000898074	0.045677
57436	Gabarapl1	gamma-aminobutyric acid (GABA) A receptor-associated protein-like 1	ENSMUSG00000030161	15760.3	-0.222305	0.0672126	-3.30749	0.000941361	0.0476894
244810	AW551984	expressed sequence AW551984	ENSMUSG00000038112	228.425	0.342669	0.103696	3.30456	0.000951244	0.0480004
68729	Trim37	tripartite motif-containing 37	ENSMUSG00000018548	12294.1	-0.235271	0.0712537	-3.30188	0.000960378	0.0480827
12609	Cebpd	CCAAT/enhancer binding protein (C/EBP), delta	ENSMUSG00000071637	402.591	-0.321898	0.0974751	-3.30236	0.000958749	0.0480827
14137	Fdft1	farnesyl diphosphate farnesyl transferase 1	ENSMUSG00000021273	2356.11	-0.255373	0.0774781	-3.29607	0.000980474	0.0488245
16777	Lamb1	laminin B1	ENSMUSG00000002900	1553.88	0.267743	0.0812474	3.2954	0.000982813	0.0488245
19894	Rph3a	rabphilin 3A	ENSMUSG00000029608	13323.9	-0.284045	0.0862519	-3.2932	0.000990535	0.0490181
66274	Lyrm9	LYR motif containing 9	ENSMUSG00000072640	798.319	-0.28651	0.087109	-3.28909	0.0010051	0.0495477
68854	Asb11	ankyrin repeat and SOCS box-containing 11	ENSMUSG00000031382	46.1768	-0.319332	0.0972243	-3.28449	0.00102167	0.0501716
269642	Nat8l	N-acetyltransferase 8-like	ENSMUSG00000048142	8533.44	-0.227698	0.0696385	-3.26971	0.00107656	0.0526653
338362	Ust	uronyl-2-sulfotransferase	ENSMUSG00000047712	3239.61	-0.223939	0.0686371	-3.26265	0.00110376	0.0535868
23936	Lynx1	Ly6/neurotoxin 1	ENSMUSG00000022594	26918.9	-0.26848	0.0822657	-3.26357	0.00110018	0.0535868
NA	NA	NA	ENSMUSG00000113121	79.9102	-0.344725	0.10573	-3.26044	0.0011124	0.0538025
72097	2010300C02Rik	RIKEN cDNA 2010300C02 gene	ENSMUSG00000026090	15986.1	-0.214924	0.06601	-3.25593	0.00113021	0.0544486
77629	Sphkap	SPHK1 interactor, AKAP domain containing	ENSMUSG00000026163	6545.2	-0.237593	0.0730098	-3.25426	0.00113689	0.0544486
19416	Rasd1	RAS, dexamethasone-induced 1	ENSMUSG00000049892	2569.03	-0.267236	0.0821291	-3.25385	0.00113851	0.0544486
236915	Arhgef9	CDC42 guanine nucleotide exchange factor (GEF) 9	ENSMUSG00000025656	13572.9	-0.215302	0.0662256	-3.25104	0.00114986	0.054787
13017	Ctbp2	C-terminal binding protein 2	ENSMUSG00000030970	578.43	0.291351	0.0896645	3.24934	0.00115673	0.0549102
14167	Fgf12	fibroblast growth factor 12	ENSMUSG00000022523	2542.38	-0.223329	0.0688455	-3.24391	0.001179	0.0557613
243339	Tmem130	transmembrane protein 130	ENSMUSG00000043388	6043.64	-0.212907	0.0656818	-3.24148	0.00118909	0.0560317
18218	Dusp8	dual specificity phosphatase 8	ENSMUSG00000037887	7306.01	0.230946	0.0713045	3.23887	0.00120006	0.0563414
213435	Mylk3	myosin light chain kinase 3	ENSMUSG00000031698	37.9046	-0.300823	0.0930045	-3.2345	0.00121856	0.0570008
225872	Npas4	neuronal PAS domain protein 4	ENSMUSG00000045903	822.542	0.310897	0.0963162	3.22788	0.00124709	0.0581236
12490	Cd34	CD34 antigen	ENSMUSG00000016494	1118.87	-0.265174	0.0822874	-3.22253	0.00127062	0.0588457
208213	Tmem132c	transmembrane protein 132C	ENSMUSG00000034324	74.5347	0.333104	0.103375	3.22228	0.00127177	0.0588457
16594	Klc2	kinesin light chain 2	ENSMUSG00000024862	11578.4	-0.218457	0.067842	-3.22009	0.00128152	0.0590836
14403	Gabrd	gamma-aminobutyric acid (GABA) A receptor, subunit delta	ENSMUSG00000029054	361.929	-0.314439	0.0983233	-3.19801	0.0013838	0.0635704
231503	Tmem150c	transmembrane protein 150C	ENSMUSG00000050640	2658.55	-0.244728	0.076638	-3.1933	0.00140655	0.0643847
55991	Panx1	pannexin 1	ENSMUSG00000031934	998.66	0.262431	0.0824381	3.18337	0.00145569	0.0662141
545156	Kalrn	kalirin, RhoGEF kinase	ENSMUSG00000061751	16088.3	-0.246158	0.0773316	-3.18315	0.00145685	0.0662141
78889	Wsb1	WD repeat and SOCS box-containing 1	ENSMUSG00000017677	282.49	0.326747	0.102693	3.1818	0.00146364	0.0662878
67252	Cap2	CAP, adenylate cyclase-associated protein, 2 (yeast)	ENSMUSG00000021373	8671.95	-0.228455	0.0718956	-3.17759	0.00148502	0.0670196
52830	Pnrc2	proline-rich nuclear receptor coactivator 2	ENSMUSG00000028675	618.885	0.287331	0.0906522	3.16959	0.00152652	0.0686506
666794	Rbm24	RNA binding motif protein 24	ENSMUSG00000038132	393.171	-0.305132	0.0965352	-3.16084	0.00157317	0.0705013
52323	Klhl7	kelch-like 7	ENSMUSG00000028986	2241.59	0.243289	0.077022	3.15869	0.00158481	0.0707285
106572	Rab31	RAB31, member RAS oncogene family	ENSMUSG00000056515	283.622	-0.32032	0.101436	-3.15787	0.00158928	0.0707285
223272	Itgbl1	integrin, beta-like 1	ENSMUSG00000032925	382.498	0.306094	0.0969722	3.15651	0.00159668	0.0708121
76898	B3gat1	beta-1,3-glucuronyltransferase 1 (glucuronosyltransferase P)	ENSMUSG00000045994	8161.95	-0.208642	0.0663066	-3.14662	0.00165171	0.0729999
12224	Klf5	Kruppel-like factor 5	ENSMUSG00000005148	136.988	-0.337576	0.107796	-3.13162	0.00173846	0.0765698
20361	Sema7a	sema domain, immunoglobulin domain (Ig), and GPI membrane anchor, (semaphorin) 7A	ENSMUSG00000038264	5275.15	-0.220192	0.0703512	-3.1299	0.00174865	0.0767148
210044	Adcy2	adenylate cyclase 2	ENSMUSG00000021536	2630.76	-0.256315	0.0819146	-3.12905	0.00175372	0.0767148
16832	Ldhb	lactate dehydrogenase B	ENSMUSG00000030246	6755.15	-0.205955	0.0658664	-3.12685	0.00176688	0.0770276
94249	Slc24a3	solute carrier family 24 (sodium/potassium/calcium exchanger), member 3	ENSMUSG00000063873	10303.9	-0.219281	0.0702177	-3.12287	0.00179099	0.0778137
18751	Prkcb	protein kinase C, beta	ENSMUSG00000052889	14336.6	-0.229969	0.073775	-3.11717	0.00182596	0.0790655
20980	Syt2	synaptotagmin II	ENSMUSG00000026452	188.316	-0.335538	0.107779	-3.11319	0.00185075	0.0798688
18012	Neurod1	neurogenic differentiation 1	ENSMUSG00000034701	715.556	0.276181	0.0888587	3.10809	0.001883	0.0803736
16492	Kcna4	potassium voltage-gated channel, shaker-related subfamily, member 4	ENSMUSG00000042604	918.013	-0.268343	0.0863001	-3.10942	0.00187457	0.0803736
81840	Sorcs2	sortilin-related VPS10 domain containing receptor 2	ENSMUSG00000029093	2157.63	0.221649	0.0713412	3.10689	0.00189067	0.0803736
74318	Hopx	HOP homeobox	ENSMUSG00000059325	372.297	0.30056	0.0967857	3.10542	0.00190008	0.0803736
212518	Sprn	shadow of prion protein	ENSMUSG00000045733	13421.6	-0.189492	0.0610383	-3.10447	0.0019062	0.0803736
14229	Fkbp5	FK506 binding protein 5	ENSMUSG00000024222	2421.88	-0.224358	0.072212	-3.10693	0.0018904	0.0803736
18719	Pip5k1b	phosphatidylinositol-4-phosphate 5-kinase, type 1 beta	ENSMUSG00000024867	1327.37	-0.240338	0.0774173	-3.10445	0.00190634	0.0803736
NA	NA	NA	ENSMUSG00000105703	69.072	-0.175848	0.0567729	-3.09738	0.00195237	0.0820444
72902	Spock3	sparc/osteonectin, cwcv and kazal-like domains proteoglycan 3	ENSMUSG00000054162	1595.59	0.238327	0.0770114	3.0947	0.00197014	0.0825205
207565	Camkk2	calcium/calmodulin-dependent protein kinase kinase 2, beta	ENSMUSG00000029471	8929.28	-0.238713	0.077242	-3.09045	0.00199854	0.0834373
58200	Ppp1r1a	protein phosphatase 1, regulatory (inhibitor) subunit 1A	ENSMUSG00000022490	1646.66	-0.254884	0.0826995	-3.08205	0.00205583	0.0855504
12404	Cbln1	cerebellin 1 precursor protein	ENSMUSG00000031654	500.996	-0.303496	0.0986042	-3.07792	0.00208453	0.0864643
14183	Fgfr2	fibroblast growth factor receptor 2	ENSMUSG00000030849	169.032	0.330168	0.107392	3.0744	0.00210923	0.0869814
23828	Bves	blood vessel epicardial substance	ENSMUSG00000071317	300.167	0.314034	0.102151	3.07422	0.00211057	0.0869814
68024	Hist1h2bc	histone cluster 1, H2bc	ENSMUSG00000018102	594.691	-0.302428	0.098492	-3.07058	0.00213642	0.0877645
13666	Eif2ak3	eukaryotic translation initiation factor 2 alpha kinase 3	ENSMUSG00000031668	848.067	0.260881	0.0849985	3.06925	0.002146	0.0878764
12176	Bnip3	BCL2/adenovirus E1B interacting protein 3	ENSMUSG00000078566	2766.44	0.215019	0.0701417	3.06549	0.0021731	0.0887026
56811	Dkk2	dickkopf WNT signaling pathway inhibitor 2	ENSMUSG00000028031	32.8258	0.273906	0.0894245	3.06298	0.00219143	0.0890504
232441	Rerg	RAS-like, estrogen-regulated, growth-inhibitor	ENSMUSG00000030222	1172.73	0.246794	0.0805878	3.06242	0.00219552	0.0890504
12125	Bcl2l11	BCL2-like 11 (apoptosis facilitator)	ENSMUSG00000027381	118.279	0.327219	0.107215	3.05199	0.00227327	0.0919132
53972	Ngef	neuronal guanine nucleotide exchange factor	ENSMUSG00000026259	3307.42	-0.231429	0.0758784	-3.04999	0.00228847	0.0922369
227753	Gsn	gelsolin	ENSMUSG00000026879	311.957	-0.319454	0.105298	-3.03382	0.0024148	0.0964191
20840	Stac	src homology three (SH3) and cysteine rich domain	ENSMUSG00000032502	228.545	-0.315613	0.104031	-3.03382	0.00241477	0.0964191
140580	Elmo1	engulfment and cell motility 1	ENSMUSG00000041112	1170.83	-0.285346	0.0940259	-3.03476	0.0024073	0.0964191
12512	Cd63	CD63 antigen	ENSMUSG00000025351	131.548	0.32686	0.107796	3.03222	0.00242764	0.0966305
14199	Fhl1	four and a half LIM domains 1	ENSMUSG00000023092	2204.14	0.215933	0.0713386	3.02687	0.00247099	0.0980516
72948	Tppp	tubulin polymerization promoting protein	ENSMUSG00000021573	19343.1	-0.196259	0.064865	-3.02565	0.00248097	0.0981438
20238	Atxn1	ataxin 1	ENSMUSG00000046876	2697.71	-0.254044	0.0840036	-3.0242	0.00249292	0.098313
232023	Vopp1	vesicular, overexpressed in cancer, prosurvival protein 1	ENSMUSG00000037788	2563.06	-0.230739	0.0763889	-3.02058	0.00252293	0.0991912
11472	Actn2	actinin alpha 2	ENSMUSG00000052374	653.558	0.273514	0.0905972	3.01901	0.00253599	0.0993998
26568	Slc27a3	solute carrier family 27 (fatty acid transporter), member 3	ENSMUSG00000027932	361.514	0.310953	0.103157	3.01437	0.00257517	0.100628
207683	Igsf11	immunoglobulin superfamily, member 11	ENSMUSG00000022790	436.005	-0.286275	0.0950179	-3.01286	0.00258802	0.100823
320500	Tmem215	transmembrane protein 215	ENSMUSG00000046593	589.745	0.278439	0.092482	3.01074	0.00260611	0.10122
16524	Kcnj9	potassium inwardly-rectifying channel, subfamily J, member 9	ENSMUSG00000038026	3092.96	-0.204157	0.0678927	-3.00705	0.00263797	0.102148
234290	BC030500	cDNA sequence BC030500	ENSMUSG00000049946	411.006	-0.301289	0.100286	-3.0043	0.00266195	0.102766
239405	Rspo2	R-spondin 2	ENSMUSG00000051920	892.485	0.28874	0.096269	2.9993	0.00270602	0.104153
11835	Ar	androgen receptor	ENSMUSG00000046532	853.801	-0.258453	0.0862323	-2.99717	0.002725	0.10457
74552	Nipal3	NIPA-like domain containing 3	ENSMUSG00000028803	3934.72	-0.20778	0.0693904	-2.99436	0.0027502	0.104909
211770	Trib1	tribbles pseudokinase 1	ENSMUSG00000032501	350.815	-0.296826	0.0991273	-2.99439	0.00274994	0.104909
545554	Ankrd34a	ankyrin repeat domain 34A	ENSMUSG00000049097	3087.48	-0.225245	0.0752776	-2.99219	0.00276987	0.105345
216881	Wscd1	WSC domain containing 1	ENSMUSG00000020811	3183.68	0.213845	0.0715075	2.99053	0.00278493	0.105605
12858	Cox5a	cytochrome c oxidase subunit Va	ENSMUSG00000000088	4641.66	-0.215567	0.0722044	-2.98552	0.002831	0.107035
108911	Rcc2	regulator of chromosome condensation 2	ENSMUSG00000040945	3523.65	-0.203982	0.068352	-2.98429	0.00284233	0.107147
110637	Grik4	glutamate receptor, ionotropic, kainate 4	ENSMUSG00000032017	3481.78	0.202531	0.0680093	2.97799	0.00290145	0.109055
100040462	Mndal	myeloid nuclear differentiation antigen like	ENSMUSG00000090272	206.607	0.315031	0.105984	2.97242	0.00295458	0.110084
16539	Kcns2	K+ voltage-gated channel, subfamily S, 2	ENSMUSG00000050963	1251.55	-0.231221	0.0777707	-2.97311	0.00294803	0.110084
22715	Zfp57	zinc finger protein 57	ENSMUSG00000036036	82.5118	0.312428	0.105084	2.97313	0.00294782	0.110084
70727	Rasgef1a	RasGEF domain family, member 1A	ENSMUSG00000030134	7586.76	-0.193856	0.0652761	-2.96979	0.00298001	0.11071
216848	Chd3	chromodomain helicase DNA binding protein 3	ENSMUSG00000018474	24677.3	-0.215663	0.072744	-2.96469	0.00302991	0.111915
268482	Krt12	keratin 12	ENSMUSG00000020912	102.786	-0.317741	0.107166	-2.96493	0.00302753	0.111915
20563	Slit2	slit guidance ligand 2	ENSMUSG00000031558	1728.46	0.222518	0.0750804	2.96373	0.00303936	0.111941
26557	Homer2	homer scaffolding protein 2	ENSMUSG00000025813	2157.17	-0.242296	0.0818726	-2.95943	0.00308213	0.113191
216152	Plppr3	phospholipid phosphatase related 3	ENSMUSG00000035835	1246.13	0.24018	0.0811912	2.95821	0.00309434	0.113315
74229	Paqr8	progestin and adipoQ receptor family member VIII	ENSMUSG00000025931	2117.86	0.21122	0.0715747	2.95104	0.00316711	0.114669
269582	Clspn	claspin	ENSMUSG00000042489	50.5316	-0.290327	0.0982993	-2.9535	0.00314193	0.114669
71904	Paqr7	progestin and adipoQ receptor family member VII	ENSMUSG00000037348	1064.07	-0.273697	0.0927294	-2.95157	0.00316164	0.114669
14282	Fosb	FBJ osteosarcoma oncogene B	ENSMUSG00000003545	576.27	0.272487	0.0923139	2.95174	0.00315985	0.114669
330222	Sdk1	sidekick cell adhesion molecule 1	ENSMUSG00000039683	276.533	0.303301	0.102848	2.94901	0.00318789	0.115096
67839	Gpsm1	G-protein signalling modulator 1 (AGS3-like, C. elegans)	ENSMUSG00000026930	1234.24	0.232366	0.0788637	2.94643	0.00321469	0.115738
22138	Ttn	titin	ENSMUSG00000051747	29.4818	-0.225615	0.0768932	-2.93414	0.00334478	0.11987
320878	Mical2	microtubule associated monooxygenase, calponin and LIM domain containing 2	ENSMUSG00000038244	19578.4	-0.201836	0.0688133	-2.9331	0.00335596	0.11987
21804	Tgfb1i1	transforming growth factor beta 1 induced transcript 1	ENSMUSG00000030782	531.276	-0.299307	0.10205	-2.93295	0.00335753	0.11987
18481	Pak3	p21 protein (Cdc42/Rac)-activated kinase 3	ENSMUSG00000031284	3833.68	0.196353	0.066997	2.93077	0.00338119	0.12038
69635	Dapk1	death associated protein kinase 1	ENSMUSG00000021559	3980.51	-0.242773	0.082964	-2.92624	0.00343081	0.121808
52838	Dnlz	DNL-type zinc finger	ENSMUSG00000075467	896.728	-0.246524	0.0844493	-2.91919	0.00350938	0.124254
68134	Upf3b	UPF3 regulator of nonsense transcripts homolog B (yeast)	ENSMUSG00000036572	575.859	0.265998	0.0911766	2.9174	0.00352964	0.124626
17159	Man2b1	mannosidase 2, alpha B1	ENSMUSG00000005142	948.382	0.278965	0.095793	2.91216	0.00358937	0.126048
64011	Nrgn	neurogranin	ENSMUSG00000053310	69126.6	-0.183781	0.0631243	-2.91141	0.00359802	0.126048
406218	Panx2	pannexin 2	ENSMUSG00000058441	3030.76	-0.227686	0.0782079	-2.91129	0.0035994	0.126048
80903	Fgf16	fibroblast growth factor 16	ENSMUSG00000031230	64.4381	-0.297934	0.102633	-2.90292	0.00369702	0.127479
75695	Rilpl1	Rab interacting lysosomal protein-like 1	ENSMUSG00000029392	1430.03	-0.221294	0.0762188	-2.90341	0.00369125	0.127479
24064	Spry2	sprouty RTK signaling antagonist 2	ENSMUSG00000022114	1064.13	-0.248645	0.0856473	-2.90312	0.0036946	0.127479
72469	Plcd3	phospholipase C, delta 3	ENSMUSG00000020937	382.735	0.281297	0.0968708	2.90383	0.00368623	0.127479
20677	Sox4	SRY (sex determining region Y)-box 4	ENSMUSG00000076431	606.197	0.263393	0.0906608	2.90526	0.00366947	0.127479
22045	Trhr	thyrotropin releasing hormone receptor	ENSMUSG00000038760	222.622	0.303435	0.104537	2.90267	0.00369994	0.127479
16970	Lrmp	lymphoid-restricted membrane protein	ENSMUSG00000030263	33.7916	-0.259531	0.0894913	-2.90007	0.00373078	0.128197
233813	Vwa3a	von Willebrand factor A domain containing 3A	ENSMUSG00000030889	159.54	0.310927	0.107397	2.89512	0.00379016	0.129889
14570	Arhgdig	Rho GDP dissociation inhibitor (GDI) gamma	ENSMUSG00000073433	2573.62	0.25207	0.0871559	2.89217	0.00382593	0.130765
330230	Zfp853	zinc finger protein 853	ENSMUSG00000093910	228.214	0.303305	0.105116	2.88544	0.00390871	0.133239
16498	Kcnab2	potassium voltage-gated channel, shaker-related subfamily, beta member 2	ENSMUSG00000028931	26983.2	-0.179943	0.0623963	-2.88387	0.00392816	0.133547
68240	Rpa3	replication protein A3	ENSMUSG00000012483	75.7666	0.302522	0.104966	2.8821	0.00395038	0.133947
117600	Srgap1	SLIT-ROBO Rho GTPase activating protein 1	ENSMUSG00000020121	722.605	-0.278621	0.096757	-2.87959	0.00398188	0.134659
216831	Arhgap44	Rho GTPase activating protein 44	ENSMUSG00000033389	5454.99	-0.214931	0.0746973	-2.87736	0.00401015	0.135258
239393	Lrp12	low density lipoprotein-related protein 12	ENSMUSG00000022305	2006.52	0.211424	0.0736346	2.87127	0.00408832	0.137533
22401	Zmat3	zinc finger matrin type 3	ENSMUSG00000027663	3980.33	-0.201628	0.0702648	-2.86955	0.00411056	0.137707
15370	Nr4a1	nuclear receptor subfamily 4, group A, member 1	ENSMUSG00000023034	3148.01	-0.221489	0.0771951	-2.86921	0.004115	0.137707
NA	NA	NA	ENSMUSG00000085058	75.058	-0.301611	0.105262	-2.86535	0.00416552	0.139035
59058	Bhlhe22	basic helix-loop-helix family, member e22	ENSMUSG00000025128	3775.44	0.191562	0.0669067	2.86312	0.00419486	0.139651
381489	Rxfp1	relaxin/insulin-like family peptide receptor 1	ENSMUSG00000034009	364.842	-0.305775	0.106918	-2.8599	0.00423779	0.140714
381310	Stum	mechanosensory transduction mediator	ENSMUSG00000053963	22703.4	-0.217467	0.076124	-2.85675	0.00427999	0.141383
67392	4833420G17Rik	RIKEN cDNA 4833420G17 gene	ENSMUSG00000062822	619.362	-0.278831	0.0975807	-2.85744	0.00427074	0.141383
18951	2021-09-05	septin 5	ENSMUSG00000072214	8219.28	-0.181418	0.0635313	-2.85557	0.00429597	0.141546
19281	Ptprt	protein tyrosine phosphatase, receptor type, T	ENSMUSG00000053141	1561.13	-0.263031	0.0921831	-2.85335	0.00432611	0.14181
67298	Gprasp1	G protein-coupled receptor associated sorting protein 1	ENSMUSG00000043384	9550.39	0.180083	0.0631097	2.85348	0.00432426	0.14181
11532	Adh5	alcohol dehydrogenase 5 (class III), chi polypeptide	ENSMUSG00000028138	1267.36	0.241029	0.0845656	2.85021	0.00436908	0.14249
74486	Osbpl10	oxysterol binding protein-like 10	ENSMUSG00000040875	821.665	-0.25965	0.0910958	-2.8503	0.00436782	0.14249
12868	Cox8a	cytochrome c oxidase subunit VIIIa	ENSMUSG00000035885	6266.82	-0.193698	0.0680743	-2.84539	0.00443577	0.144298
12520	Cd81	CD81 antigen	ENSMUSG00000037706	4143.46	0.188296	0.0662292	2.84309	0.00446787	0.144974
226525	Rasal2	RAS protein activator like 2	ENSMUSG00000070565	1889.79	-0.239608	0.0843619	-2.84024	0.004508	0.145539
23892	Grem1	gremlin 1, DAN family BMP antagonist	ENSMUSG00000074934	281.237	-0.28634	0.100806	-2.8405	0.00450427	0.145539
56089	Ramp3	receptor (calcitonin) activity modifying protein 3	ENSMUSG00000041046	99.9826	-0.303641	0.107054	-2.83634	0.00456342	0.146958
245578	Pcdh11x	protocadherin 11 X-linked	ENSMUSG00000034755	259.221	0.292213	0.103069	2.83512	0.00458087	0.14715
76901	Jade2	jade family PHD finger 2	ENSMUSG00000020387	1116.28	-0.222942	0.0788336	-2.82801	0.00468387	0.150083
14708	Gng7	guanine nucleotide binding protein (G protein), gamma 7	ENSMUSG00000048240	5750.43	-0.182938	0.0647707	-2.8244	0.00473694	0.151028
12808	Cobl	cordon-bleu WH2 repeat	ENSMUSG00000020173	845.661	0.24983	0.0884456	2.82467	0.00473295	0.151028
109593	Lmo3	LIM domain only 3	ENSMUSG00000030226	5370.13	-0.208095	0.0737023	-2.82346	0.00475086	0.151096
51800	Bok	BCL2-related ovarian killer	ENSMUSG00000026278	2710.25	-0.230753	0.0819151	-2.81697	0.00484786	0.1538
76982	3110035E14Rik	RIKEN cDNA 3110035E14 gene	ENSMUSG00000067879	11284.3	-0.18287	0.0649921	-2.81373	0.00489703	0.154976
14205	Vegfd	vascular endothelial growth factor D	ENSMUSG00000031380	202.843	0.302678	0.107775	2.80843	0.00497831	0.15716
56332	Amotl2	angiomotin-like 2	ENSMUSG00000032531	144.06	0.302098	0.107719	2.8045	0.00503953	0.158702
13492	Drd5	dopamine receptor D5	ENSMUSG00000039358	398.936	-0.270479	0.0965324	-2.80195	0.00507945	0.159319
16438	Itpr1	inositol 1,4,5-trisphosphate receptor 1	ENSMUSG00000030102	5747.31	-0.215489	0.0769145	-2.80166	0.00508399	0.159319
213783	Plekhg1	pleckstrin homology domain containing, family G (with RhoGef domain) member 1	ENSMUSG00000040624	1038.33	0.273578	0.0977087	2.79994	0.00511124	0.159782
622434	Arhgef26	Rho guanine nucleotide exchange factor (GEF) 26	ENSMUSG00000036885	1473.15	0.221379	0.0791076	2.79845	0.00513484	0.160129
56213	Htra1	HtrA serine peptidase 1	ENSMUSG00000006205	564.494	0.266565	0.09529	2.79741	0.00515136	0.160255
74754	Dhcr24	24-dehydrocholesterol reductase	ENSMUSG00000034926	2594.97	-0.246468	0.0882186	-2.79384	0.00520868	0.160638
70292	Afap1	actin filament associated protein 1	ENSMUSG00000029094	493.282	0.258646	0.0925169	2.79566	0.00517941	0.160638
20621	Snn	stannin	ENSMUSG00000037972	6363.02	-0.223868	0.0801383	-2.79352	0.00521381	0.160638
20983	Syt4	synaptotagmin IV	ENSMUSG00000024261	5207.48	0.192452	0.0688632	2.79471	0.00519469	0.160638
12971	Crym	crystallin, mu	ENSMUSG00000030905	16686.7	-0.194231	0.0696034	-2.79055	0.00526193	0.161732
192786	Rapgef6	Rap guanine nucleotide exchange factor (GEF) 6	ENSMUSG00000037533	993.599	0.228087	0.08183	2.78733	0.00531449	0.162956
232333	Slc6a1	solute carrier family 6 (neurotransmitter transporter, GABA), member 1	ENSMUSG00000030310	657.933	0.261029	0.0936816	2.78635	0.0053306	0.16306
50708	Hist1h1c	histone cluster 1, H1c	ENSMUSG00000036181	252.935	-0.294095	0.10567	-2.78314	0.00538362	0.16429
244867	Arhgap20	Rho GTPase activating protein 20	ENSMUSG00000053199	1484.62	-0.240652	0.0865532	-2.78039	0.00542934	0.165292
270049	Galntl6	UDP-N-acetyl-alpha-D-galactosamine:polypeptide N-acetylgalactosaminyltransferase-like 6	ENSMUSG00000096914	706.425	-0.259387	0.0934139	-2.77675	0.0054906	0.166761
73112	Abracl	ABRA C-terminal like	ENSMUSG00000078453	333.842	-0.283273	0.102065	-2.77541	0.00551321	0.166809
235106	Ntm	neurotrimin	ENSMUSG00000059974	3399.63	-0.200468	0.0722376	-2.77511	0.00551823	0.166809
320127	Dgki	diacylglycerol kinase, iota	ENSMUSG00000038665	461.43	-0.273222	0.0985319	-2.77293	0.00555549	0.16754
382253	Cdkl5	cyclin-dependent kinase-like 5	ENSMUSG00000031292	5453.13	-0.199676	0.0720511	-2.77131	0.00558318	0.16798
80889	Tlnrd1	talin rod domain containing 1	ENSMUSG00000070462	1317.7	-0.222401	0.0804375	-2.7649	0.0056941	0.170916
56378	Arpc3	actin related protein 2/3 complex, subunit 3	ENSMUSG00000029465	6019.15	-0.179751	0.065239	-2.75527	0.0058644	0.174937
216825	Usp22	ubiquitin specific peptidase 22	ENSMUSG00000042506	14614.9	0.193357	0.0701511	2.75629	0.00584618	0.174937
14811	Grin2a	glutamate receptor, ionotropic, NMDA2A (epsilon 1)	ENSMUSG00000059003	9073.8	-0.204936	0.0743865	-2.75501	0.00586899	0.174937
80334	Kcnip4	Kv channel interacting protein 4	ENSMUSG00000029088	1781.11	-0.211065	0.0768501	-2.74645	0.00602446	0.178836
50914	Olig1	oligodendrocyte transcription factor 1	ENSMUSG00000046160	237.059	-0.285614	0.104001	-2.74627	0.00602772	0.178836
381801	Tatdn2	TatD DNase domain containing 2	ENSMUSG00000056952	1233.24	-0.231714	0.0844525	-2.74372	0.00607474	0.179815
277414	Trp53i11	transformation related protein 53 inducible protein 11	ENSMUSG00000068735	1670.39	0.215575	0.0787537	2.73733	0.00619398	0.182922
17380	Mme	membrane metallo endopeptidase	ENSMUSG00000027820	33.436	-0.246987	0.0903832	-2.73267	0.00628235	0.185106
56431	Dstn	destrin	ENSMUSG00000015932	5724.02	-0.179504	0.0659165	-2.7232	0.00646533	0.188823
20441	St3gal3	ST3 beta-galactoside alpha-2,3-sialyltransferase 3	ENSMUSG00000028538	1527.86	-0.205477	0.0754481	-2.72342	0.00646093	0.188823
NA	NA	NA	ENSMUSG00000098760	29.9332	-0.239776	0.0880682	-2.72261	0.00647677	0.188823
17873	Gadd45b	growth arrest and DNA-damage-inducible 45 beta	ENSMUSG00000015312	684.867	0.246483	0.090541	2.72234	0.00648218	0.188823
218544	Sgtb	small glutamine-rich tetratricopeptide repeat (TPR)-containing, beta	ENSMUSG00000042743	2448.36	-0.200094	0.0734548	-2.72404	0.00644888	0.188823
15476	Hs3st1	heparan sulfate (glucosamine) 3-O-sulfotransferase 1	ENSMUSG00000051022	370.176	-0.270712	0.0995887	-2.7183	0.00656181	0.190709
50781	Dkk3	dickkopf WNT signaling pathway inhibitor 3	ENSMUSG00000030772	13552.4	-0.180249	0.066479	-2.71136	0.00670075	0.194307
12334	Capn2	calpain 2	ENSMUSG00000026509	1205.52	0.223688	0.0825867	2.70852	0.00675845	0.194927
60345	Nrip2	nuclear receptor interacting protein 2	ENSMUSG00000001520	99.1159	-0.289161	0.106778	-2.70806	0.00676778	0.194927
12565	Cdh9	cadherin 9	ENSMUSG00000025370	1385.74	0.216954	0.0800806	2.7092	0.00674458	0.194927
109246	Tspan9	tetraspanin 9	ENSMUSG00000030352	1782.34	0.209535	0.0774172	2.70656	0.0067984	0.194933
72309	Tmem158	transmembrane protein 158	ENSMUSG00000054871	2072.67	-0.252401	0.0932416	-2.70695	0.00679042	0.194933
68861	1190002N15Rik	RIKEN cDNA 1190002N15 gene	ENSMUSG00000045414	523.612	-0.25743	0.0951787	-2.7047	0.00683666	0.195266
18648	Pgam1	phosphoglycerate mutase 1	ENSMUSG00000011752	5470.24	-0.175456	0.0648752	-2.70451	0.00684049	0.195266
56274	Stk3	serine/threonine kinase 3	ENSMUSG00000022329	385.348	0.261214	0.0967778	2.69911	0.00695245	0.198021
382018	Unc13a	unc-13 homolog A (C. elegans)	ENSMUSG00000034799	14132	-0.223467	0.0829848	-2.69287	0.00708405	0.201322
18577	Pde4a	phosphodiesterase 4A, cAMP specific	ENSMUSG00000032177	3136.27	-0.207752	0.0771708	-2.69211	0.00710012	0.201332
NA	NA	NA	ENSMUSG00000110344	198.542	0.289468	0.107554	2.69137	0.00711599	0.201337
353310	Zfp703	zinc finger protein 703	ENSMUSG00000085795	759.205	-0.236577	0.0880493	-2.68687	0.00721248	0.203617
54156	Egfl6	EGF-like-domain, multiple 6	ENSMUSG00000000402	39.5683	-0.246598	0.0918969	-2.68342	0.00728732	0.205278
27984	Efhd2	EF hand domain containing 2	ENSMUSG00000040659	2472.42	-0.217801	0.081348	-2.6774	0.00741958	0.208546
103978	Gpc5	glypican 5	ENSMUSG00000022112	250.154	-0.278144	0.104124	-2.67129	0.00755596	0.211914
212712	Satb2	special AT-rich sequence binding protein 2	ENSMUSG00000038331	716.871	-0.265432	0.0994793	-2.66821	0.00762568	0.213308
12653	Chgb	chromogranin B	ENSMUSG00000027350	49499.4	0.173341	0.0649845	2.66742	0.00764356	0.213308
270109	Pcnx2	pecanex homolog 2	ENSMUSG00000060212	3903.39	-0.20295	0.0761413	-2.66543	0.00768889	0.213308
235040	Atg4d	autophagy related 4D, cysteine peptidase	ENSMUSG00000002820	555.236	-0.23943	0.0897969	-2.66635	0.007668	0.213308
380836	Mrs2	MRS2 magnesium transporter	ENSMUSG00000021339	2182.34	-0.200495	0.0752041	-2.66601	0.00767566	0.213308
78334	Cdk19	cyclin-dependent kinase 19	ENSMUSG00000038481	1040.28	-0.221494	0.0831839	-2.6627	0.00775159	0.214583
226250	Afap1l2	actin filament associated protein 1-like 2	ENSMUSG00000025083	221.301	0.283434	0.106492	2.66156	0.00777795	0.214849
16519	Kcnj3	potassium inwardly-rectifying channel, subfamily J, member 3	ENSMUSG00000026824	4440.67	-0.187271	0.0703916	-2.66042	0.0078043	0.215113
211896	Depdc7	DEP domain containing 7	ENSMUSG00000027173	53.94	-0.263093	0.0993784	-2.64739	0.00811154	0.2199
NA	NA	NA	ENSMUSG00000097156	225.498	0.285356	0.107763	2.648	0.00809704	0.2199
103172	Chchd10	coiled-coil-helix-coiled-coil-helix domain containing 10	ENSMUSG00000049422	3698.81	-0.18305	0.0690521	-2.65089	0.00802794	0.2199
75409	Slitrk5	SLIT and NTRK-like family, member 5	ENSMUSG00000033214	3270.88	-0.18329	0.0691952	-2.64889	0.00807568	0.2199
50787	Hs6st3	heparan sulfate 6-O-sulfotransferase 3	ENSMUSG00000053465	369.48	-0.27851	0.105244	-2.64633	0.00813698	0.2199
78709	Spink8	serine peptidase inhibitor, Kazal type 8	ENSMUSG00000050074	500.756	-0.268757	0.101528	-2.64712	0.00811804	0.2199
18030	Nfil3	nuclear factor, interleukin 3, regulated	ENSMUSG00000056749	351.835	0.26466	0.099968	2.64745	0.00811014	0.2199
12890	Cplx2	complexin 2	ENSMUSG00000025867	72880.8	0.174875	0.0660938	2.64585	0.00814851	0.2199
238205	Lrfn5	leucine rich repeat and fibronectin type III domain containing 5	ENSMUSG00000035653	2469.62	-0.183245	0.0692956	-2.64439	0.00818386	0.2199
77627	Efcab6	EF-hand calcium binding domain 6	ENSMUSG00000022441	135.087	-0.284867	0.107717	-2.6446	0.0081788	0.2199
240063	Zfp811	zinc finger protein 811	ENSMUSG00000055202	273.397	0.273542	0.103226	2.64994	0.00805069	0.2199
17202	Mc4r	melanocortin 4 receptor	ENSMUSG00000047259	222.451	-0.282861	0.10696	-2.64456	0.00817976	0.2199
12010	B2m	beta-2 microglobulin	ENSMUSG00000060802	752.146	0.241884	0.0915595	2.64183	0.00824601	0.220684
NA	NA	NA	ENSMUSG00000086181	167.585	-0.283943	0.10754	-2.64036	0.0082819	0.220684
11669	Aldh2	aldehyde dehydrogenase 2, mitochondrial	ENSMUSG00000029455	1427.59	-0.210998	0.0798789	-2.64147	0.00825463	0.220684
81003	Trim23	tripartite motif-containing 23	ENSMUSG00000021712	2444	0.199032	0.0753668	2.64084	0.00826997	0.220684
18391	Sigmar1	sigma non-opioid intracellular receptor 1	ENSMUSG00000036078	874.314	-0.217435	0.0824199	-2.63813	0.00833644	0.221612
68628	Fbxw9	F-box and WD-40 domain protein 9	ENSMUSG00000008167	691.694	0.253156	0.0960067	2.63685	0.00836787	0.221612
12671	Chrm3	cholinergic receptor, muscarinic 3, cardiac	ENSMUSG00000046159	2560	-0.185243	0.0702522	-2.63683	0.00836859	0.221612
237010	Klhl4	kelch-like 4	ENSMUSG00000025597	101.073	0.282526	0.107272	2.63373	0.00844536	0.22215
57742	Abhd1	abhydrolase domain containing 1	ENSMUSG00000006638	46.5209	-0.229829	0.0872202	-2.63504	0.00841265	0.22215
12834	Col6a2	collagen, type VI, alpha 2	ENSMUSG00000020241	231.405	0.278592	0.105828	2.63251	0.00847557	0.22215
78892	Crispld2	cysteine-rich secretory protein LCCL domain containing 2	ENSMUSG00000031825	29.9457	0.229355	0.0870911	2.6335	0.00845089	0.22215
11554	Adrb1	adrenergic receptor, beta 1	ENSMUSG00000035283	557.277	-0.252091	0.0957428	-2.633	0.00846343	0.22215
18645	Pfn2	profilin 2	ENSMUSG00000027805	16685	-0.190302	0.0723447	-2.63049	0.00852608	0.222355
237397	C2cd4c	C2 calcium-dependent domain containing 4C	ENSMUSG00000045912	506.43	0.241653	0.0918789	2.63012	0.00853545	0.222355
21354	Tap1	transporter 1, ATP-binding cassette, sub-family B (MDR/TAP)	ENSMUSG00000037321	43.1726	0.243151	0.092423	2.63085	0.00851724	0.222355
72605	Car10	carbonic anhydrase 10	ENSMUSG00000056158	1273.21	-0.234099	0.0890781	-2.62802	0.00858837	0.222378
72386	2610035D17Rik	RIKEN cDNA 2610035D17 gene	ENSMUSG00000087259	298.239	0.275708	0.104868	2.6291	0.00856105	0.222378
20775	Sqle	squalene epoxidase	ENSMUSG00000022351	2492.91	-0.19194	0.0730271	-2.62834	0.00858033	0.222378
110075	Bmp3	bone morphogenetic protein 3	ENSMUSG00000029335	294.848	-0.268549	0.102308	-2.62491	0.00866716	0.223222
66270	Retreg1	reticulophagy regulator 1	ENSMUSG00000022270	1131.29	0.205952	0.0784676	2.62467	0.0086732	0.223222
17929	Myom1	myomesin 1	ENSMUSG00000024049	108.075	-0.282019	0.107449	-2.62468	0.00867314	0.223222
27281	Hrasls	HRAS-like suppressor	ENSMUSG00000022525	248.744	-0.273802	0.104355	-2.62375	0.00869664	0.223376
230157	Tmeff1	transmembrane protein with EGF-like and two follistatin-like domains 1	ENSMUSG00000028347	2485.58	-0.202063	0.0771084	-2.62051	0.00877992	0.224615
22421	Wnt7a	wingless-type MMTV integration site family, member 7A	ENSMUSG00000030093	342.815	0.273408	0.104311	2.62107	0.0087653	0.224615
67498	Kcnv1	potassium channel, subfamily V, member 1	ENSMUSG00000022342	2167.76	-0.213944	0.081729	-2.61772	0.00885195	0.226007
13857	Epor	erythropoietin receptor	ENSMUSG00000006235	82.164	-0.270911	0.103547	-2.6163	0.00888877	0.226496
329641	Sertm1	serine rich and transmembrane domain containing 1	ENSMUSG00000056306	2553.08	-0.188111	0.0719689	-2.61379	0.0089545	0.227267
231570	A830010M20Rik	RIKEN cDNA A830010M20 gene	ENSMUSG00000111375	2557.86	0.192422	0.0736129	2.61398	0.00894948	0.227267
100503185	Btbd8	BTB (POZ) domain containing 8	ENSMUSG00000111375	2557.86	0.192422	0.0736129	2.61398	0.00894948	0.227267
67126	Atp5e	ATP synthase, H+ transporting, mitochondrial F1 complex, epsilon subunit	ENSMUSG00000016252	910.96	-0.223313	0.0858652	-2.60074	0.00930236	0.235629
380924	Olfm4	olfactomedin 4	ENSMUSG00000022026	236.202	0.276827	0.106515	2.59895	0.00935098	0.235928
268373	Ppia	peptidylprolyl isomerase A	ENSMUSG00000071866	17985.9	-0.167312	0.0643651	-2.59943	0.00933794	0.235928
320541	Slc35e2	solute carrier family 35, member E2	ENSMUSG00000042202	1142.65	-0.207283	0.0797864	-2.59797	0.00937768	0.236137
14299	Ncs1	neuronal calcium sensor 1	ENSMUSG00000062661	8233.73	-0.166071	0.0639706	-2.59606	0.00942998	0.236988
15357	Hmgcr	3-hydroxy-3-methylglutaryl-Coenzyme A reductase	ENSMUSG00000021670	5262.13	-0.191997	0.0739793	-2.59528	0.00945134	0.23706
21825	Thbs1	thrombospondin 1	ENSMUSG00000040152	143.13	0.279285	0.107665	2.59402	0.00948607	0.237467
227449	Zcchc2	zinc finger, CCHC domain containing 2	ENSMUSG00000038866	1080.81	-0.222782	0.0859194	-2.59292	0.00951643	0.237762
246710	Rhobtb2	Rho-related BTB domain containing 2	ENSMUSG00000022075	2725.05	-0.206806	0.0797917	-2.59183	0.00954672	0.238055
21987	Tpd52l1	tumor protein D52-like 1	ENSMUSG00000000296	382.193	-0.259923	0.100368	-2.58971	0.00960571	0.238598
114479	Slc5a5	solute carrier family 5 (sodium iodide symporter), member 5	ENSMUSG00000000792	732.379	0.266666	0.102962	2.58994	0.00959928	0.238598
22174	Tyro3	TYRO3 protein tyrosine kinase 3	ENSMUSG00000027298	4477.09	-0.176756	0.0682801	-2.5887	0.00963401	0.238838
50766	Crim1	cysteine rich transmembrane BMP regulator 1 (chordin like)	ENSMUSG00000024074	3849.64	-0.180405	0.0697597	-2.5861	0.00970691	0.24018
98952	Fam102a	family with sequence similarity 102, member A	ENSMUSG00000039157	2397.53	-0.183385	0.0709472	-2.58481	0.00974329	0.240616
238266	Syt16	synaptotagmin XVI	ENSMUSG00000044912	2754.71	-0.184015	0.071224	-2.5836	0.00977745	0.240995
69642	Mlip	muscular LMNA-interacting protein	ENSMUSG00000032355	1147.64	-0.213626	0.0827337	-2.58209	0.0098204	0.241127
170459	Stard4	StAR-related lipid transfer (START) domain containing 4	ENSMUSG00000024378	550.199	-0.251412	0.0973479	-2.58262	0.00980543	0.241127
329735	4933431E20Rik	RIKEN cDNA 4933431E20 gene	ENSMUSG00000086968	2280.36	-0.192191	0.0744764	-2.58056	0.00986401	0.241734
75697	C2cd4b	C2 calcium-dependent domain containing 4B	ENSMUSG00000091956	186.322	-0.277982	0.107751	-2.57987	0.00988383	0.241758
18578	Pde4b	phosphodiesterase 4B, cAMP specific	ENSMUSG00000028525	1944.61	0.187292	0.0726446	2.57819	0.00993191	0.242294
224019	Tmem191c	transmembrane protein 191C	ENSMUSG00000055692	1184.49	-0.206688	0.0801804	-2.57779	0.00994354	0.242294
13830	Stom	stomatin	ENSMUSG00000026880	118.258	0.277667	0.107758	2.57676	0.00997321	0.242555
13845	Ephb3	Eph receptor B3	ENSMUSG00000005958	980.49	-0.212605	0.0825813	-2.5745	0.0100386	0.243684
18718	Pip4k2a	phosphatidylinositol-5-phosphate 4-kinase, type II, alpha	ENSMUSG00000026737	1522.71	-0.195782	0.0761359	-2.57148	0.0101266	0.244462
16500	Kcnb1	potassium voltage gated channel, Shab-related subfamily, member 1	ENSMUSG00000050556	3826.07	-0.219159	0.0851854	-2.57273	0.01009	0.244462
66863	Lztr1	leucine-zipper-like transcriptional regulator, 1	ENSMUSG00000022761	8937.98	-0.174109	0.067709	-2.57143	0.0101279	0.244462
17932	Myt1	myelin transcription factor 1	ENSMUSG00000010505	289.44	0.260289	0.101256	2.57059	0.0101526	0.244597
18049	Ngf	nerve growth factor	ENSMUSG00000027859	59.5378	0.260973	0.101621	2.5681	0.0102257	0.245896
271849	Shc4	SHC (Src homology 2 domain containing) family, member 4	ENSMUSG00000035109	72.1701	0.267787	0.104521	2.56204	0.0104061	0.248505
22063	Trpc1	transient receptor potential cation channel, subfamily C, member 1	ENSMUSG00000032839	1853.62	0.188299	0.0735115	2.56149	0.0104224	0.248505
74020	Cpne4	copine IV	ENSMUSG00000032564	6225.67	0.177904	0.069461	2.56121	0.0104309	0.248505
26913	Gprin1	G protein-regulated inducer of neurite outgrowth 1	ENSMUSG00000069227	11083.3	-0.177017	0.069053	-2.56349	0.0103626	0.248505
226098	Hectd2	HECT domain E3 ubiquitin protein ligase 2	ENSMUSG00000041180	801.286	0.228991	0.0894077	2.5612	0.0104311	0.248505
16400	Itga3	integrin alpha 3	ENSMUSG00000001507	558.463	0.230338	0.0900516	2.55785	0.0105323	0.249986
27404	Abca8b	ATP-binding cassette, sub-family A (ABC1), member 8b	ENSMUSG00000020620	675.568	0.221593	0.0866322	2.55785	0.010532	0.249986
13038	Ctsk	cathepsin K	ENSMUSG00000028111	99.3952	0.272307	0.106563	2.55537	0.0106076	0.251308
207596	Thsd4	thrombospondin, type I, domain containing 4	ENSMUSG00000032289	5338.75	0.226576	0.0887942	2.5517	0.0107198	0.253032
75735	Pank1	pantothenate kinase 1	ENSMUSG00000033610	274.191	-0.26741	0.104773	-2.5523	0.0107016	0.253032
229949	Ak5	adenylate kinase 5	ENSMUSG00000039058	14754.1	0.158753	0.0622353	2.55085	0.0107461	0.253185
18028	Nfib	nuclear factor I/B	ENSMUSG00000008575	5399.27	0.165764	0.0650928	2.54658	0.0108785	0.254898
22634	Plagl1	pleiomorphic adenoma gene-like 1	ENSMUSG00000019817	1152.96	0.246762	0.0968676	2.54741	0.0108525	0.254898
110279	Bcr	breakpoint cluster region	ENSMUSG00000009681	4175.75	-0.178171	0.0699531	-2.54701	0.0108651	0.254898
21956	Tnnt2	troponin T2, cardiac	ENSMUSG00000026414	46.8146	-0.245198	0.0964155	-2.54314	0.0109861	0.255454
17118	Marcks	myristoylated alanine rich protein kinase C substrate	ENSMUSG00000069662	3068.96	-0.217032	0.0853781	-2.54201	0.0110218	0.255454
68281	4930430F08Rik	RIKEN cDNA 4930430F08 gene	ENSMUSG00000046567	439.511	0.243416	0.0956713	2.54429	0.0109499	0.255454
328232	Gfod1	glucose-fructose oxidoreductase domain containing 1	ENSMUSG00000051335	3840.98	-0.194521	0.0765142	-2.54229	0.011013	0.255454
11852	Rhob	ras homolog family member B	ENSMUSG00000054364	12074.3	0.173015	0.0680618	2.54203	0.0110212	0.255454
27221	Chaf1a	chromatin assembly factor 1, subunit A (p150)	ENSMUSG00000002835	210.087	0.270682	0.106368	2.54478	0.0109347	0.255454
11671	Aldh3a2	aldehyde dehydrogenase family 3, subfamily A2	ENSMUSG00000010025	1553.5	0.191353	0.0753477	2.5396	0.0110979	0.256755
12298	Cacnb4	calcium channel, voltage-dependent, beta 4 subunit	ENSMUSG00000017412	2917.15	-0.185706	0.0731822	-2.53758	0.0111622	0.256851
16518	Kcnj2	potassium inwardly-rectifying channel, subfamily J, member 2	ENSMUSG00000041695	124.689	-0.273133	0.107612	-2.53813	0.0111446	0.256851
22762	Zfpm2	zinc finger protein, multitype 2	ENSMUSG00000022306	833.824	0.215371	0.0848427	2.53847	0.0111339	0.256851
83691	Crispld1	cysteine-rich secretory protein LCCL domain containing 1	ENSMUSG00000025776	91.9782	-0.258719	0.102226	-2.53086	0.0113784	0.261356
26414	Mapk10	mitogen-activated protein kinase 10	ENSMUSG00000046709	15333.3	-0.17834	0.0705378	-2.52829	0.011462	0.262806
319520	Dusp4	dual specificity phosphatase 4	ENSMUSG00000031530	645.775	-0.24618	0.0974109	-2.52723	0.0114966	0.263129
13179	Dcn	decorin	ENSMUSG00000019929	2417.62	0.2128	0.0842491	2.52584	0.0115423	0.263703
16011	Igfbp5	insulin-like growth factor binding protein 5	ENSMUSG00000026185	1944.55	-0.238241	0.0943593	-2.52483	0.0115755	0.263991
227733	Pip5kl1	phosphatidylinositol-4-phosphate 5-kinase-like 1	ENSMUSG00000046854	36.3976	0.22815	0.0904788	2.52158	0.0116828	0.264609
232201	Arhgap25	Rho GTPase activating protein 25	ENSMUSG00000030047	108.495	-0.271592	0.107655	-2.5228	0.0116424	0.264609
26968	Islr	immunoglobulin superfamily containing leucine-rich repeat	ENSMUSG00000037206	246.107	0.260214	0.103197	2.52153	0.0116846	0.264609
59025	Usp14	ubiquitin specific peptidase 14	ENSMUSG00000047879	3983.04	0.183435	0.072748	2.52151	0.0116851	0.264609
50786	Hs6st2	heparan sulfate 6-O-sulfotransferase 2	ENSMUSG00000062184	1183.8	-0.212615	0.0843664	-2.52013	0.011731	0.264712
77087	Ankrd11	ankyrin repeat domain 11	ENSMUSG00000035569	3733.68	-0.180975	0.0717977	-2.52062	0.0117149	0.264712
210417	Thsd7b	thrombospondin, type I, domain containing 7B	ENSMUSG00000042581	806.334	0.210975	0.0837922	2.51784	0.0118076	0.265506
225849	Ppp2r5b	protein phosphatase 2, regulatory subunit B', beta	ENSMUSG00000024777	5875.81	0.176848	0.0702312	2.51808	0.0117996	0.265506
72713	Angptl1	angiopoietin-like 1	ENSMUSG00000033544	58.2778	0.255396	0.101501	2.5162	0.0118628	0.26628
21814	Tgfbr3	transforming growth factor, beta receptor III	ENSMUSG00000029287	352.29	0.245463	0.0977303	2.51163	0.0120174	0.268416
219257	Pcdh20	protocadherin 20	ENSMUSG00000050505	4514.44	0.186132	0.0741108	2.51153	0.0120208	0.268416
16522	Kcnj6	potassium inwardly-rectifying channel, subfamily J, member 6	ENSMUSG00000043301	793.853	-0.232383	0.0924861	-2.51263	0.0119836	0.268416
118445	Klf16	Kruppel-like factor 16	ENSMUSG00000035397	2774.51	-0.19223	0.0765623	-2.51076	0.012047	0.268533
245450	Slitrk2	SLIT and NTRK-like family, member 2	ENSMUSG00000036790	692.873	0.234112	0.0932661	2.51015	0.012068	0.268533
226413	Lct	lactase	ENSMUSG00000026354	1286.87	-0.266931	0.106467	-2.50718	0.0121699	0.270333
74136	Sec14l1	SEC14-like lipid binding 1	ENSMUSG00000020823	8067.64	-0.169652	0.067685	-2.50649	0.0121937	0.270393
68202	Ndufa5	NADH dehydrogenase (ubiquinone) 1 alpha subcomplex, 5	ENSMUSG00000023089	1757.84	-0.194217	0.0775453	-2.50456	0.0122605	0.271403
20346	Sema3a	sema domain, immunoglobulin domain (Ig), short basic domain, secreted, (semaphorin) 3A	ENSMUSG00000028883	91.6785	-0.257365	0.102802	-2.50351	0.0122967	0.271736
68337	Crip2	cysteine rich protein 2	ENSMUSG00000006356	2177.19	-0.192985	0.077311	-2.49622	0.0125524	0.276433
26379	Esrra	estrogen related receptor, alpha	ENSMUSG00000024955	1325.23	-0.201354	0.0806539	-2.49652	0.0125419	0.276433
20349	Sema3e	sema domain, immunoglobulin domain (Ig), short basic domain, secreted, (semaphorin) 3E	ENSMUSG00000063531	3691.72	0.177961	0.0713658	2.49365	0.0126436	0.277964
21923	Tnc	tenascin C	ENSMUSG00000028364	54.0691	0.246241	0.0988143	2.49196	0.012704	0.278337
100126243	A030001D20Rik	RIKEN cDNA A030001D20 gene	ENSMUSG00000110357	172.307	-0.265585	0.106566	-2.49221	0.012695	0.278337
319832	Tmem229a	transmembrane protein 229A	ENSMUSG00000048022	398.557	-0.238092	0.0955741	-2.49117	0.0127322	0.278479
23999	Twf2	twinfilin actin binding protein 2	ENSMUSG00000023277	1363.35	-0.200262	0.0804275	-2.48997	0.0127753	0.278945
22139	Ttr	transthyretin	ENSMUSG00000061808	647.811	0.259291	0.104174	2.48901	0.01281	0.279227
20318	Sdf4	stromal cell derived factor 4	ENSMUSG00000029076	4980.62	-0.161432	0.0648897	-2.48779	0.0128539	0.27971
245424	Gpr101	G protein-coupled receptor 101	ENSMUSG00000036357	585.643	-0.22677	0.0912832	-2.48425	0.0129826	0.280369
57816	Tesc	tescalcin	ENSMUSG00000029359	1751.54	0.207447	0.0834525	2.48581	0.0129258	0.280369
21676	Tead1	TEA domain family member 1	ENSMUSG00000055320	479.066	0.230905	0.0929527	2.48411	0.0129877	0.280369
57754	Cend1	cell cycle exit and neuronal differentiation 1	ENSMUSG00000060240	12662.1	-0.161776	0.0651602	-2.48275	0.0130374	0.280369
224860	Plcl2	phospholipase C-like 2	ENSMUSG00000038910	2477.1	-0.172122	0.0693208	-2.48298	0.0130289	0.280369
329002	Zfp236	zinc finger protein 236	ENSMUSG00000041258	828.671	-0.209663	0.0844296	-2.48329	0.0130174	0.280369
80906	Kcnip2	Kv channel-interacting protein 2	ENSMUSG00000025221	4659.68	-0.160428	0.06457	-2.48455	0.0129714	0.280369
67606	Fibin	fin bud initiation factor homolog (zebrafish)	ENSMUSG00000074971	143.647	0.266478	0.107476	2.47942	0.0131595	0.281578
12527	Cd9	CD9 antigen	ENSMUSG00000030342	49.616	0.245267	0.0989069	2.47977	0.0131466	0.281578
20788	Srebf2	sterol regulatory element binding factor 2	ENSMUSG00000022463	8163.14	-0.18306	0.0737999	-2.48049	0.0131201	0.281578
67429	Nudcd1	NudC domain containing 1	ENSMUSG00000038736	523.861	0.23119	0.0933246	2.47727	0.0132393	0.282813
12426	Cckbr	cholecystokinin B receptor	ENSMUSG00000030898	648.527	-0.238279	0.096211	-2.47663	0.0132629	0.282846
20409	Ostf1	osteoclast stimulating factor 1	ENSMUSG00000024725	608.005	0.233559	0.0943365	2.47581	0.0132933	0.283025
72007	Fndc3b	fibronectin type III domain containing 3B	ENSMUSG00000039286	674.41	0.212771	0.0859991	2.47411	0.0133569	0.283437
14281	Fos	FBJ osteosarcoma oncogene	ENSMUSG00000021250	1446.02	0.198899	0.0803744	2.47466	0.0133365	0.283437
73178	Wasl	Wiskott-Aldrich syndrome-like (human)	ENSMUSG00000029684	3912.82	-0.174731	0.0707158	-2.47089	0.0134779	0.284899
53357	Pla2g6	phospholipase A2, group VI	ENSMUSG00000042632	709.609	-0.218392	0.0883648	-2.47149	0.0134553	0.284899
72514	Fgfbp3	fibroblast growth factor binding protein 3	ENSMUSG00000047632	52.7928	0.232916	0.0942789	2.4705	0.0134925	0.284899
17254	Slc3a2	solute carrier family 3 (activators of dibasic and neutral amino acid transport), member 2	ENSMUSG00000010095	3400.95	0.193087	0.0782713	2.46689	0.0136292	0.287312
212285	Arap2	ArfGAP with RhoGAP domain, ankyrin repeat and PH domain 2	ENSMUSG00000037999	1669.72	-0.207798	0.0842734	-2.46576	0.0136724	0.287492
384763	Zfp667	zinc finger protein 667	ENSMUSG00000054893	574.984	0.227993	0.0924738	2.46549	0.0136826	0.287492
72393	Faim2	Fas apoptotic inhibitory molecule 2	ENSMUSG00000023011	10794.7	-0.172298	0.070055	-2.45947	0.0139141	0.291878
56526	2021-09-06	septin 6	ENSMUSG00000050379	3151.93	-0.170038	0.0691732	-2.45814	0.0139658	0.292483
217151	Arl5c	ADP-ribosylation factor-like 5C	ENSMUSG00000038352	33.0209	0.217973	0.0887713	2.45544	0.0140711	0.294207
56224	Tspan5	tetraspanin 5	ENSMUSG00000028152	4861.08	-0.189638	0.077476	-2.4477	0.0143769	0.296253
56710	Brinp1	bone morphogenic protein/retinoic acid inducible neural specific 1	ENSMUSG00000028351	12826.5	-0.167754	0.0684934	-2.4492	0.0143173	0.296253
230779	Serinc2	serine incorporator 2	ENSMUSG00000023232	240.113	0.259451	0.10593	2.44926	0.0143149	0.296253
231125	Zfyve28	zinc finger, FYVE domain containing 28	ENSMUSG00000037224	791.836	-0.209544	0.0855059	-2.45063	0.0142605	0.296253
19664	Rbpj	recombination signal binding protein for immunoglobulin kappa J region	ENSMUSG00000039191	347.851	-0.242513	0.0990554	-2.44826	0.0143549	0.296253
231876	Lmtk2	lemur tyrosine kinase 2	ENSMUSG00000038970	4926.95	-0.183703	0.075009	-2.44908	0.0143221	0.296253
235442	Rab8b	RAB8B, member RAS oncogene family	ENSMUSG00000036943	1342	-0.203698	0.0831206	-2.45064	0.0142604	0.296253
52897	Rbfox3	RNA binding protein, fox-1 homolog (C. elegans) 3	ENSMUSG00000025576	11535.5	-0.190023	0.0776238	-2.448	0.0143652	0.296253
116838	Rims2	regulating synaptic membrane exocytosis 2	ENSMUSG00000037386	2382.54	-0.17708	0.0722353	-2.45144	0.0142287	0.296253
66445	Cyc1	cytochrome c-1	ENSMUSG00000022551	4622.78	-0.171592	0.0702629	-2.44214	0.0146006	0.299991
15925	Ide	insulin degrading enzyme	ENSMUSG00000056999	1874.89	0.245648	0.100592	2.44202	0.0146052	0.299991
NA	NA	NA	ENSMUSG00000072769	1915.03	-0.175146	0.0717854	-2.43986	0.0146931	0.301314
73569	Vgll3	vestigial like family member 3	ENSMUSG00000091243	215.485	0.261153	0.107157	2.43711	0.0148052	0.303129
23988	Pin1	protein (peptidyl-prolyl cis/trans isomerase) NIMA-interacting 1	ENSMUSG00000032171	2287.03	-0.171854	0.070558	-2.43564	0.0148654	0.303876
209773	Dennd2a	DENN/MADD domain containing 2A	ENSMUSG00000038456	1140.14	0.215845	0.0887145	2.43303	0.0149732	0.305592
233335	Synm	synemin, intermediate filament protein	ENSMUSG00000030554	1496.7	-0.194465	0.0800724	-2.42861	0.0151567	0.308845
116837	Rims1	regulating synaptic membrane exocytosis 1	ENSMUSG00000041670	6080.97	-0.176304	0.0726563	-2.42655	0.0152431	0.309647
11514	Adcy8	adenylate cyclase 8	ENSMUSG00000022376	768.662	-0.210775	0.0868632	-2.42652	0.0152444	0.309647
59126	Nek6	NIMA (never in mitosis gene a)-related expressed kinase 6	ENSMUSG00000026749	1592.28	0.181649	0.0749726	2.42287	0.0153985	0.312283
73327	Pradc1	protease-associated domain containing 1	ENSMUSG00000030008	237.966	-0.25337	0.104674	-2.42056	0.0154965	0.313774
72754	Arhgef10l	Rho guanine nucleotide exchange factor (GEF) 10-like	ENSMUSG00000040964	781.647	0.220496	0.0912112	2.41742	0.0156311	0.315006
52250	Reep1	receptor accessory protein 1	ENSMUSG00000052852	4977.01	-0.18143	0.0750383	-2.41783	0.0156134	0.315006
217154	Stac2	SH3 and cysteine rich domain 2	ENSMUSG00000017400	1303.82	0.205251	0.0848722	2.41835	0.015591	0.315006
52662	Ldlrad4	low density lipoprotein receptor class A domain containing 4	ENSMUSG00000024544	382.241	-0.241491	0.0999911	-2.41512	0.01573	0.316502
19340	Rab3d	RAB3D, member RAS oncogene family	ENSMUSG00000019066	774.094	-0.211713	0.087715	-2.41365	0.0157937	0.317285
12563	Cdh6	cadherin 6	ENSMUSG00000039385	533.611	-0.217812	0.0905009	-2.40674	0.0160955	0.322842
22142	Tuba1a	tubulin, alpha 1A	ENSMUSG00000072235	47901.3	0.15286	0.0635632	2.40485	0.0161791	0.324012
72293	Nkd2	naked cuticle 2	ENSMUSG00000021567	655.833	0.222108	0.0925019	2.40112	0.016345	0.326315
217684	Susd6	sushi domain containing 6	ENSMUSG00000021133	2517.9	-0.180694	0.0752476	-2.40132	0.0163359	0.326315
14815	Nr3c1	nuclear receptor subfamily 3, group C, member 1	ENSMUSG00000024431	1599.37	-0.182036	0.0759378	-2.39718	0.016522	0.329335
229709	Ahcyl1	S-adenosylhomocysteine hydrolase-like 1	ENSMUSG00000027893	6598.95	-0.15164	0.063295	-2.39576	0.0165858	0.329952
208936	Adamts18	a disintegrin-like and metallopeptidase (reprolysin type) with thrombospondin type 1 motif, 18	ENSMUSG00000053399	49.7781	0.234178	0.0977634	2.39535	0.0166044	0.329952
319387	Adgrl3	adhesion G protein-coupled receptor L3	ENSMUSG00000037605	2244.27	-0.193712	0.0809316	-2.39353	0.0166873	0.330573
12122	Bid	BH3 interacting domain death agonist	ENSMUSG00000004446	575.868	0.22506	0.0940197	2.39375	0.0166771	0.330573
329160	9130024F11Rik	RIKEN cDNA 9130024F11 gene	ENSMUSG00000087022	146.533	-0.25697	0.107456	-2.39141	0.0167837	0.33197
102636041	Gm38484	predicted gene, 38484	ENSMUSG00000087022	146.533	-0.25697	0.107456	-2.39141	0.0167837	0.33197
192164	Pcdha12	protocadherin alpha 12	ENSMUSG00000103310	370.213	-0.241038	0.100907	-2.38872	0.0169071	0.333896
17294	Mest	mesoderm specific transcript	ENSMUSG00000051855	770.722	0.206459	0.0864762	2.38747	0.0169649	0.334522
20498	Slc12a4	solute carrier family 12, member 4	ENSMUSG00000017765	65.1748	0.245077	0.102912	2.38142	0.0172459	0.33954
100503085	Klhl3	kelch-like 3	ENSMUSG00000014164	4199.19	-0.179804	0.0756647	-2.37633	0.017486	0.343738
268451	Rab11fip4	RAB11 family interacting protein 4 (class II)	ENSMUSG00000017639	10248.2	-0.186418	0.0784764	-2.37546	0.0175269	0.344016
106957	Slc39a6	solute carrier family 39 (metal ion transporter), member 6	ENSMUSG00000024270	2201.81	0.176367	0.0742664	2.37479	0.017559	0.344118
21961	Tns1	tensin 1	ENSMUSG00000055322	439.261	-0.225309	0.0950921	-2.36938	0.0178181	0.347353
70729	Nos1ap	nitric oxide synthase 1 (neuronal) adaptor protein	ENSMUSG00000038473	3496.42	-0.203275	0.0857975	-2.36924	0.0178245	0.347353
228836	Dlgap4	DLG associated protein 4	ENSMUSG00000061689	13160.6	-0.164467	0.0694019	-2.36978	0.0177987	0.347353
19094	Mapk11	mitogen-activated protein kinase 11	ENSMUSG00000053137	791.592	-0.209497	0.0884297	-2.36908	0.0178324	0.347353
64143	Ralb	v-ral simian leukemia viral oncogene B	ENSMUSG00000004451	479.295	-0.225848	0.0955109	-2.36463	0.0180479	0.351016
70546	Zdhhc2	zinc finger, DHHC domain containing 2	ENSMUSG00000039470	1183	-0.207548	0.0878165	-2.36343	0.0181068	0.351629
22393	Wfs1	wolframin ER transmembrane glycoprotein	ENSMUSG00000039474	8108.21	-0.254589	0.107766	-2.36242	0.0181561	0.352052
13131	Dab1	disabled 1	ENSMUSG00000028519	2629.37	-0.169659	0.0718353	-2.36178	0.0181873	0.352125
331401	Thoc2	THO complex 2	ENSMUSG00000037475	505.143	0.22114	0.0936616	2.36106	0.018223	0.352284
170711	Otud7a	OTU domain containing 7A	ENSMUSG00000033510	2734.52	-0.171733	0.0727736	-2.35983	0.0182834	0.352919
98386	Lbr	lamin B receptor	ENSMUSG00000004880	120.726	0.253944	0.107794	2.35582	0.0184818	0.354874
243274	Tmem132d	transmembrane protein 132D	ENSMUSG00000034310	656.528	-0.221032	0.0938348	-2.35555	0.0184954	0.354874
235402	Lingo1	leucine rich repeat and Ig domain containing 1	ENSMUSG00000049556	18070.1	-0.161648	0.0686078	-2.35611	0.0184673	0.354874
13527	Dtna	dystrobrevin alpha	ENSMUSG00000024302	3635.33	0.171757	0.0729075	2.35582	0.0184821	0.354874
66104	Tceal6	transcription elongation factor A (SII)-like 6	ENSMUSG00000031409	1477.32	-0.180035	0.076523	-2.3527	0.0186379	0.356083
16592	Fabp5	fatty acid binding protein 5, epidermal	ENSMUSG00000027533	1604.79	-0.203852	0.0867102	-2.35096	0.0187251	0.356083
231532	Arhgap24	Rho GTPase activating protein 24	ENSMUSG00000057315	129.377	-0.252005	0.10712	-2.35255	0.018645	0.356083
232232	Hdac11	histone deacetylase 11	ENSMUSG00000034245	5390.62	-0.15522	0.0660017	-2.35176	0.0186849	0.356083
68118	Atg101	autophagy related 101	ENSMUSG00000037204	1173.38	-0.185179	0.0787624	-2.35111	0.0187175	0.356083
207806	Usf3	upstream transcription factor family member 3	ENSMUSG00000068284	1467.84	-0.216416	0.0920257	-2.35169	0.0186882	0.356083
243373	AI854703	expressed sequence AI854703	ENSMUSG00000053297	829.512	-0.196281	0.0835635	-2.34888	0.0188298	0.357543
237979	Sdk2	sidekick cell adhesion molecule 2	ENSMUSG00000041592	1571.8	0.208591	0.0888603	2.34741	0.0189047	0.358434
69029	Smdt1	single-pass membrane protein with aspartate rich tail 1	ENSMUSG00000022452	1091.66	-0.213582	0.0910228	-2.34647	0.0189521	0.358803
NA	NA	NA	ENSMUSG00000097287	366.077	-0.232795	0.0992833	-2.34476	0.0190395	0.359395
20273	Scn8a	sodium channel, voltage-gated, type VIII, alpha	ENSMUSG00000023033	10960.3	-0.184805	0.0788059	-2.34507	0.0190236	0.359395
14560	Gdf10	growth differentiation factor 10	ENSMUSG00000021943	828.528	0.19728	0.0841605	2.34409	0.0190735	0.359508
100126795	Gm10575	predicted gene 10575	ENSMUSG00000073787	66.662	0.237138	0.101254	2.34202	0.0191796	0.35992
71330	Rcbtb1	regulator of chromosome condensation (RCC1) and BTB (POZ) domain containing protein 1	ENSMUSG00000035469	847.327	0.197427	0.0842816	2.34247	0.0191565	0.35992
56409	Nudt3	nudix (nucleotide diphosphate linked moiety X)-type motif 3	ENSMUSG00000024213	7065.86	-0.164273	0.070135	-2.34224	0.0191682	0.35992
53623	Gria3	glutamate receptor, ionotropic, AMPA3 (alpha 3)	ENSMUSG00000001986	6758.72	-0.15443	0.0659803	-2.34055	0.0192553	0.360379
67495	Tmem167b	transmembrane protein 167B	ENSMUSG00000068732	1370.1	-0.18459	0.0788692	-2.34045	0.0192603	0.360379
20855	Stc1	stanniocalcin 1	ENSMUSG00000014813	161.729	-0.251799	0.107726	-2.3374	0.0194184	0.362806
208869	Dock3	dedicator of cyto-kinesis 3	ENSMUSG00000039716	3794.64	-0.181233	0.0776157	-2.33501	0.0195432	0.364606
12859	Cox5b	cytochrome c oxidase subunit Vb	ENSMUSG00000061518	5124.11	-0.159448	0.06836	-2.33247	0.0196758	0.366547
16401	Itga4	integrin alpha 4	ENSMUSG00000027009	696.085	-0.211929	0.0909632	-2.32983	0.0198151	0.368607
319804	Glt1d1	glycosyltransferase 1 domain containing 1	ENSMUSG00000049971	815.861	-0.22212	0.095385	-2.32866	0.0198769	0.368685
69612	Kansl2	KAT8 regulatory NSL complex subunit 2	ENSMUSG00000022992	988.305	-0.190857	0.0819475	-2.32902	0.0198582	0.368685
332175	Zdhhc23	zinc finger, DHHC domain containing 23	ENSMUSG00000036304	2709.81	-0.169811	0.0730252	-2.32538	0.0200515	0.370318
385658	Nxpe3	neurexophilin and PC-esterase domain family, member 3	ENSMUSG00000075033	674.125	-0.211704	0.0910249	-2.32578	0.0200302	0.370318
12305	Ddr1	discoidin domain receptor family, member 1	ENSMUSG00000003534	1300.43	0.189923	0.0816642	2.32565	0.020037	0.370318
68725	1110032F04Rik	RIKEN cDNA 1110032F04 gene	ENSMUSG00000046999	506.233	-0.228488	0.0984018	-2.32199	0.0202337	0.372785
382111	Susd5	sushi domain containing 5	ENSMUSG00000086596	36.89	-0.215676	0.0928916	-2.32181	0.0202433	0.372785
56461	Kcnip3	Kv channel interacting protein 3, calsenilin	ENSMUSG00000079056	2940.52	-0.163873	0.070615	-2.32065	0.0203057	0.373062
21345	Tagln	transgelin	ENSMUSG00000032085	30.9152	0.203055	0.0875068	2.32045	0.0203165	0.373062
239618	Pdzrn4	PDZ domain containing RING finger 4	ENSMUSG00000036218	118.857	-0.249324	0.107659	-2.31587	0.0205654	0.37671
11668	Aldh1a1	aldehyde dehydrogenase family 1, subfamily A1	ENSMUSG00000053279	214.256	-0.247388	0.10683	-2.31571	0.020574	0.37671
320092	E030003E18Rik	RIKEN cDNA E030003E18 gene	ENSMUSG00000053279	214.256	-0.247388	0.10683	-2.31571	0.020574	0.37671
319551	6330420H09Rik	RIKEN cDNA 6330420H09 gene	ENSMUSG00000109898	104.268	-0.245867	0.106291	-2.31316	0.0207137	0.378726
12388	Ctnnd1	catenin (cadherin associated protein), delta 1	ENSMUSG00000034101	366.383	0.225382	0.0975542	2.31033	0.0208698	0.381038
66743	Rnf220	ring finger protein 220	ENSMUSG00000028677	4962.79	-0.163038	0.0706033	-2.30921	0.020932	0.381629
94232	Ubqln4	ubiquilin 4	ENSMUSG00000008604	3252.78	-0.167844	0.0727475	-2.30721	0.021043	0.382565
18792	Plau	plasminogen activator, urokinase	ENSMUSG00000021822	37.3883	-0.209815	0.0909339	-2.30733	0.0210364	0.382565
11857	Arhgdib	Rho, GDP dissociation inhibitor (GDI) beta	ENSMUSG00000030220	119.103	-0.247351	0.107289	-2.30547	0.0211401	0.383242
NA	NA	NA	ENSMUSG00000097683	65.8759	0.23428	0.101618	2.3055	0.0211385	0.383242
218772	Rarb	retinoic acid receptor, beta	ENSMUSG00000017491	141.456	0.24774	0.107486	2.30487	0.0211741	0.383317
59032	Ppp2r3c	protein phosphatase 2, regulatory subunit B'', gamma	ENSMUSG00000021022	546.176	0.210705	0.0914725	2.30348	0.0212518	0.38418
14760	Gpr19	G protein-coupled receptor 19	ENSMUSG00000032641	380.152	0.222945	0.0969653	2.29923	0.021492	0.387976
NA	NA	NA	ENSMUSG00000085565	41.5557	-0.211489	0.0920762	-2.29689	0.0216248	0.389547
11519	Add2	adducin 2 (beta)	ENSMUSG00000030000	15055	-0.164004	0.0714179	-2.29641	0.0216526	0.389547
320116	Fndc9	fibronectin type III domain containing 9	ENSMUSG00000048721	133.636	0.246572	0.107387	2.2961	0.0216702	0.389547
68481	Mpzl1	myelin protein zero-like 1	ENSMUSG00000026566	408.884	0.219853	0.0958401	2.29396	0.021793	0.390658
17470	Cd200	CD200 antigen	ENSMUSG00000022661	3955.6	0.157763	0.0687636	2.29429	0.0217741	0.390658
67921	Ube2f	ubiquitin-conjugating enzyme E2F (putative)	ENSMUSG00000034343	1279.41	-0.176098	0.0768145	-2.29252	0.0218758	0.391596
64933	Ap3m2	adaptor-related protein complex 3, mu 2 subunit	ENSMUSG00000031539	5467.01	-0.15531	0.067788	-2.29112	0.0219564	0.391944
14042	Ext1	exostoses (multiple) 1	ENSMUSG00000061731	1271.01	-0.190607	0.0831761	-2.29161	0.021928	0.391944
71713	Cdc40	cell division cycle 40	ENSMUSG00000038446	2036.99	-0.184619	0.0806048	-2.29043	0.0219965	0.392113
68262	Agpat4	1-acylglycerol-3-phosphate O-acyltransferase 4 (lysophosphatidic acid acyltransferase, delta)	ENSMUSG00000023827	2208.16	0.163365	0.0713595	2.28932	0.0220609	0.392714
15273	Hivep2	human immunodeficiency virus type I enhancer binding protein 2	ENSMUSG00000015501	12355	-0.176435	0.077248	-2.284	0.0223713	0.397137
67304	3110070M22Rik	RIKEN cDNA 3110070M22 gene	ENSMUSG00000074635	49.2233	-0.219178	0.0959458	-2.2844	0.0223482	0.397137
75734	Mff	mitochondrial fission factor	ENSMUSG00000026150	4892.33	-0.154698	0.0677688	-2.28273	0.0224463	0.397367
13628	Eef1a2	eukaryotic translation elongation factor 1 alpha 2	ENSMUSG00000016349	42803.4	-0.157764	0.0691095	-2.28281	0.0224414	0.397367
110596	Arhgef28	Rho guanine nucleotide exchange factor (GEF) 28	ENSMUSG00000021662	1865.25	-0.182137	0.0798604	-2.28069	0.0225667	0.398399
211914	Asap2	ArfGAP with SH3 domain, ankyrin repeat and PH domain 2	ENSMUSG00000052632	2012.04	-0.203221	0.0890998	-2.28082	0.022559	0.398399
53897	Gal3st1	galactose-3-O-sulfotransferase 1	ENSMUSG00000049721	95.4277	-0.241092	0.105788	-2.27902	0.0226661	0.399414
216963	Git1	G protein-coupled receptor kinase-interactor 1	ENSMUSG00000011877	9604.6	-0.154449	0.0677803	-2.27867	0.0226865	0.399414
216874	Camta2	calmodulin binding transcription activator 2	ENSMUSG00000040712	21291.7	-0.1704	0.0748512	-2.27652	0.0228151	0.401126
223881	Rnd1	Rho family GTPase 1	ENSMUSG00000054855	917.568	-0.184323	0.0810287	-2.27479	0.0229185	0.402393
76709	Arpc2	actin related protein 2/3 complex, subunit 2	ENSMUSG00000006304	10713.6	-0.142029	0.062492	-2.27275	0.0230412	0.403541
20254	Scg2	secretogranin II	ENSMUSG00000050711	10335.7	0.151928	0.0668503	2.27266	0.0230469	0.403541
20418	Shc3	src homology 2 domain-containing transforming protein C3	ENSMUSG00000021448	823.58	-0.230904	0.101677	-2.27096	0.0231492	0.40478
73737	1110008P14Rik	RIKEN cDNA 1110008P14 gene	ENSMUSG00000039195	2531.7	-0.181657	0.0800528	-2.26922	0.023255	0.405364
270672	Map3k15	mitogen-activated protein kinase kinase kinase 15	ENSMUSG00000031303	56.0209	-0.219655	0.096924	-2.26626	0.0234356	0.405364
73124	Golim4	golgi integral membrane protein 4	ENSMUSG00000034109	298.334	0.235133	0.103654	2.26844	0.0233022	0.405364
16490	Kcna2	potassium voltage-gated channel, shaker-related subfamily, member 2	ENSMUSG00000040724	4923.94	-0.191942	0.0846838	-2.26657	0.0234164	0.405364
231834	Snx8	sorting nexin 8	ENSMUSG00000029560	57.4199	-0.213028	0.0938552	-2.26975	0.0232226	0.405364
68185	Coa4	cytochrome c oxidase assembly factor 4	ENSMUSG00000044881	58.0787	-0.228348	0.100756	-2.26635	0.0234302	0.405364
214764	Edrf1	erythroid differentiation regulatory factor 1	ENSMUSG00000039990	946.101	0.18796	0.0829096	2.26704	0.0233875	0.405364
11932	Atp1b2	ATPase, Na+/K+ transporting, beta 2 polypeptide	ENSMUSG00000041329	4984.49	-0.167643	0.0739345	-2.26745	0.0233628	0.405364
12387	Ctnnb1	catenin (cadherin associated protein), beta 1	ENSMUSG00000006932	21505	0.142697	0.0629814	2.26571	0.0234693	0.405399
13518	Dst	dystonin	ENSMUSG00000026131	3668.64	-0.205437	0.0907898	-2.26278	0.0236493	0.407002
15461	Hras	Harvey rat sarcoma virus oncogene	ENSMUSG00000025499	3085.34	-0.189935	0.0839656	-2.26205	0.0236941	0.407002
83436	Plekha2	pleckstrin homology domain-containing, family A (phosphoinositide binding specific) member 2	ENSMUSG00000031557	665.297	-0.225814	0.0998318	-2.26195	0.0237007	0.407002
20650	Sntb2	syntrophin, basic 2	ENSMUSG00000041308	459.516	0.220655	0.0975874	2.26111	0.0237526	0.407002
114713	Rasa2	RAS p21 protein activator 2	ENSMUSG00000032413	525.866	0.20812	0.0920096	2.26193	0.0237015	0.407002
17977	Ncoa1	nuclear receptor coactivator 1	ENSMUSG00000020647	4929.04	-0.172792	0.0764031	-2.26158	0.0237233	0.407002
11989	Slc7a3	solute carrier family 7 (cationic amino acid transporter, y+ system), member 3	ENSMUSG00000031297	233.775	0.23689	0.104894	2.25838	0.0239221	0.409359
12927	Bcar1	breast cancer anti-estrogen resistance 1	ENSMUSG00000031955	2605.51	0.161346	0.0715319	2.25558	0.024097	0.410706
13627	Eef1a1	eukaryotic translation elongation factor 1 alpha 1	ENSMUSG00000037742	42911.5	0.147506	0.0653875	2.25587	0.0240787	0.410706
268890	Lsamp	limbic system-associated membrane protein	ENSMUSG00000061080	11765	-0.145952	0.0646867	-2.25629	0.0240527	0.410706
12614	Celsr1	cadherin, EGF LAG seven-pass G-type receptor 1	ENSMUSG00000016028	53.752	0.223972	0.0993858	2.25356	0.0242239	0.412321
18125	Nos1	nitric oxide synthase 1, neuronal	ENSMUSG00000029361	2878.45	0.184877	0.0821069	2.25166	0.0243436	0.413809
243382	Ppm1k	protein phosphatase 1K (PP2C domain containing)	ENSMUSG00000037826	1568.06	-0.17562	0.0780911	-2.24892	0.0245178	0.416218
211401	Mtss1	metastasis suppressor 1	ENSMUSG00000022353	1123.49	0.186691	0.0830365	2.2483	0.0245571	0.416333
269994	Gsg1l	GSG1-like	ENSMUSG00000046182	705.38	-0.229552	0.102275	-2.24445	0.0248037	0.419774
24001	Tiam2	T cell lymphoma invasion and metastasis 2	ENSMUSG00000023800	763.251	-0.203945	0.0908802	-2.24411	0.0248255	0.419774
399566	Btbd6	BTB (POZ) domain containing 6	ENSMUSG00000002803	1100.3	-0.198536	0.0884958	-2.24345	0.0248677	0.419932
71960	Myh14	myosin, heavy polypeptide 14	ENSMUSG00000030739	335.008	0.223925	0.0998654	2.24227	0.024944	0.420667
207227	Stxbp5l	syntaxin binding protein 5-like	ENSMUSG00000022829	1142.48	-0.21055	0.0939477	-2.24114	0.0250172	0.420794
83674	Cnnm1	cyclin M1	ENSMUSG00000025189	3079.5	-0.158948	0.0709194	-2.24125	0.0250096	0.420794
13800	Enah	ENAH actin regulator	ENSMUSG00000022995	4663.84	-0.15571	0.0695152	-2.23994	0.025095	0.420998
52840	Dbndd2	dysbindin (dystrobrevin binding protein 1) domain containing 2	ENSMUSG00000017734	1320.21	-0.183763	0.0820243	-2.24035	0.0250683	0.420998
218203	Mylip	myosin regulatory light chain interacting protein	ENSMUSG00000038175	674.451	-0.198448	0.088632	-2.23901	0.0251554	0.42146
68585	Rtn4	reticulon 4	ENSMUSG00000020458	21483.9	-0.153362	0.0685418	-2.2375	0.0252537	0.422555
228033	Atp5g3	ATP synthase, H+ transporting, mitochondrial F0 complex, subunit C3 (subunit 9)	ENSMUSG00000018770	6576.11	-0.154309	0.0690176	-2.23579	0.0253654	0.423318
57740	Stk32c	serine/threonine kinase 32C	ENSMUSG00000015981	2199.93	-0.160893	0.0719476	-2.23626	0.025335	0.423318
13821	Epb41l1	erythrocyte membrane protein band 4.1 like 1	ENSMUSG00000027624	15966.6	-0.172252	0.0771242	-2.23344	0.0255202	0.423694
100383	Bsdc1	BSD domain containing 1	ENSMUSG00000040859	1617.16	0.169966	0.076091	2.23372	0.0255018	0.423694
52466	Slc46a1	solute carrier family 46, member 1	ENSMUSG00000020829	119.412	-0.240617	0.107732	-2.23347	0.0255179	0.423694
13660	Ehd1	EH-domain containing 1	ENSMUSG00000024772	2998.32	0.163595	0.0732244	2.23416	0.0254726	0.423694
13595	Ebp	phenylalkylamine Ca2+ antagonist (emopamil) binding protein	ENSMUSG00000031168	557.642	0.206229	0.0923867	2.23224	0.0255991	0.424455
320563	Islr2	immunoglobulin superfamily containing leucine-rich repeat 2	ENSMUSG00000051243	11529.1	0.166553	0.0747852	2.22708	0.0259418	0.429581
93843	Pnck	pregnancy upregulated non-ubiquitously expressed CaM kinase	ENSMUSG00000002012	2523.47	0.186383	0.0837557	2.22531	0.0260602	0.429664
19206	Ptch1	patched 1	ENSMUSG00000021466	532.007	-0.20521	0.0922142	-2.22536	0.0260568	0.429664
15902	Id2	inhibitor of DNA binding 2	ENSMUSG00000020644	677.321	-0.222111	0.099822	-2.22508	0.0260762	0.429664
54526	Syt10	synaptotagmin X	ENSMUSG00000063260	78.8189	-0.233541	0.104962	-2.22501	0.0260809	0.429664
140741	Gpr6	G protein-coupled receptor 6	ENSMUSG00000046922	68.76	-0.222494	0.100113	-2.22243	0.0262542	0.431964
78618	Acap2	ArfGAP with coiled-coil, ankyrin repeat and PH domains 2	ENSMUSG00000049076	1828.31	-0.165645	0.0745767	-2.22114	0.0263416	0.432847
110911	Cds2	CDP-diacylglycerol synthase (phosphatidate cytidylyltransferase) 2	ENSMUSG00000058793	16723	-0.147223	0.0663522	-2.21882	0.0264992	0.434879
93761	Smarca1	SWI/SNF related, matrix associated, actin dependent regulator of chromatin, subfamily a, member 1	ENSMUSG00000031099	800.748	0.189106	0.0852791	2.2175	0.0265889	0.435792
18107	Nmt1	N-myristoyltransferase 1	ENSMUSG00000020936	7356.43	-0.153069	0.0690603	-2.21645	0.0266608	0.435965
399558	Flrt2	fibronectin leucine rich transmembrane protein 2	ENSMUSG00000047414	1079.76	-0.19253	0.0868678	-2.21635	0.0266674	0.435965
81898	Sf3b1	splicing factor 3b, subunit 1	ENSMUSG00000025982	2742.88	0.17635	0.0796423	2.21428	0.0268098	0.437734
14114	Fbln1	fibulin 1	ENSMUSG00000006369	309.536	0.224681	0.101506	2.21347	0.026865	0.438078
59041	Stk25	serine/threonine kinase 25 (yeast)	ENSMUSG00000026277	8548.25	-0.141006	0.0637659	-2.21131	0.0270143	0.439421
72043	Sulf2	sulfatase 2	ENSMUSG00000006800	9003.26	0.146233	0.0661305	2.21129	0.027016	0.439421
246313	Prokr2	prokineticin receptor 2	ENSMUSG00000050558	267.398	-0.226929	0.102828	-2.20689	0.0273217	0.443096
76499	Clasp2	CLIP associating protein 2	ENSMUSG00000033392	9506.9	0.138067	0.0625476	2.2074	0.0272862	0.443096
75668	Rasl10a	RAS-like, family 10, member A	ENSMUSG00000034209	1177.78	0.191362	0.0867246	2.20655	0.0273456	0.443096
320827	C530008M17Rik	RIKEN cDNA C530008M17 gene	ENSMUSG00000036377	2975.98	0.172347	0.0782055	2.20377	0.0275407	0.445693
12750	Clk4	CDC like kinase 4	ENSMUSG00000020385	397.229	0.215853	0.098021	2.20211	0.0276575	0.447019
66481	Rps21	ribosomal protein S21	ENSMUSG00000039001	801.61	-0.186094	0.0847189	-2.19661	0.0280486	0.450164
80883	Ntng1	netrin G1	ENSMUSG00000059857	1091.75	-0.181139	0.0824053	-2.19815	0.0279387	0.450164
20423	Shh	sonic hedgehog	ENSMUSG00000002633	75.0215	0.229793	0.104622	2.19641	0.0280628	0.450164
319277	Washc4	WASH complex subunit 4	ENSMUSG00000034560	617.495	0.200809	0.0913965	2.19712	0.0280116	0.450164
378435	Mafa	v-maf musculoaponeurotic fibrosarcoma oncogene family, protein A (avian)	ENSMUSG00000047591	142.791	-0.236605	0.107659	-2.19773	0.0279681	0.450164
76217	Jakmip2	janus kinase and microtubule interacting protein 2	ENSMUSG00000024502	2379.06	-0.167945	0.076463	-2.19643	0.0280614	0.450164
107586	Ovol2	ovo like zinc finger 2	ENSMUSG00000037279	59.3599	-0.223311	0.101698	-2.19583	0.0281041	0.450263
192678	Rassf3	Ras association (RalGDS/AF-6) domain family member 3	ENSMUSG00000025795	406.381	-0.229196	0.104408	-2.19521	0.0281489	0.450417
68097	Dynll2	dynein light chain LC8-type 2	ENSMUSG00000020483	10784.7	-0.158784	0.0724445	-2.1918	0.0283937	0.453767
69126	1810022K09Rik	RIKEN cDNA 1810022K09 gene	ENSMUSG00000078784	343.375	0.220984	0.100886	2.19045	0.0284918	0.454769
11538	Adnp	activity-dependent neuroprotective protein	ENSMUSG00000051149	115.829	-0.229237	0.104707	-2.18933	0.0285727	0.455493
NA	NA	NA	ENSMUSG00000085067	159.336	-0.234698	0.107289	-2.18753	0.0287041	0.456001
18616	Peg3	paternally expressed 3	ENSMUSG00000002265	4595.7	0.155588	0.0711356	2.18721	0.0287274	0.456001
12759	Clu	clusterin	ENSMUSG00000022037	4352.32	0.154692	0.0706933	2.18821	0.0286544	0.456001
170719	Oxr1	oxidation resistance 1	ENSMUSG00000022307	7322.23	-0.148914	0.0680925	-2.18694	0.0287469	0.456001
22652	Mkrn3	makorin, ring finger protein, 3	ENSMUSG00000070527	496.345	0.215807	0.0987596	2.18518	0.0288758	0.45748
70350	Basp1	brain abundant, membrane attached signal protein 1	ENSMUSG00000045763	28918.1	-0.182323	0.0835173	-2.18306	0.0290317	0.459382
16581	Kifc2	kinesin family member C2	ENSMUSG00000004187	11212.5	-0.156558	0.0717332	-2.18251	0.0290723	0.459456
320940	Atp11c	ATPase, class VI, type 11C	ENSMUSG00000062949	183.711	0.233121	0.106928	2.18018	0.0292442	0.461495
17749	Polr2k	polymerase (RNA) II (DNA directed) polypeptide K	ENSMUSG00000045996	133.909	0.234975	0.107797	2.17979	0.0292733	0.461495
100862456	LOC100862456	DNA-directed RNA polymerases I, II, and III subunit RPABC4	ENSMUSG00000045996	133.909	0.234975	0.107797	2.17979	0.0292733	0.461495
102641086	LOC102641086	DNA-directed RNA polymerases I, II, and III subunit RPABC4	ENSMUSG00000045996	133.909	0.234975	0.107797	2.17979	0.0292733	0.461495
18213	Ntrk3	neurotrophic tyrosine kinase, receptor, type 3	ENSMUSG00000059146	5523.89	-0.174762	0.0802857	-2.17675	0.0294992	0.464486
414121	E430016F16Rik	RIKEN cDNA E430016F16 gene	ENSMUSG00000059146	5523.89	-0.174762	0.0802857	-2.17675	0.0294992	0.464486
627191	Syndig1l	synapse differentiation inducing 1 like	ENSMUSG00000071234	235.828	-0.231203	0.106339	-2.17421	0.0296894	0.466906
269109	Dpp10	dipeptidylpeptidase 10	ENSMUSG00000036815	882.601	-0.201702	0.0927957	-2.17361	0.0297344	0.467041
NA	NA	NA	ENSMUSG00000085566	288.834	-0.225641	0.103844	-2.1729	0.0297882	0.467314
15212	Hexb	hexosaminidase B	ENSMUSG00000021665	300.538	0.221232	0.101873	2.17164	0.029883	0.468227
16007	Cyr61	cysteine rich protein 61	ENSMUSG00000028195	48.4786	-0.202789	0.0934094	-2.17097	0.0299333	0.468444
20893	Bhlhe40	basic helix-loop-helix family, member e40	ENSMUSG00000030103	3092.52	-0.147577	0.0680189	-2.16965	0.0300334	0.469437
16528	Kcnk4	potassium channel, subfamily K, member 4	ENSMUSG00000024957	437.398	-0.205208	0.0946261	-2.16862	0.0301119	0.47009
13175	Dclk1	doublecortin-like kinase 1	ENSMUSG00000027797	30553.6	-0.153891	0.0710338	-2.16645	0.0302765	0.471511
18162	Npr3	natriuretic peptide receptor 3	ENSMUSG00000022206	975.526	-0.175721	0.0811084	-2.16649	0.0302737	0.471511
16154	Il10ra	interleukin 10 receptor, alpha	ENSMUSG00000032089	32.581	0.193642	0.0894302	2.16529	0.0303655	0.472324
208666	Diras1	DIRAS family, GTP-binding RAS-like 1	ENSMUSG00000043670	3975.31	-0.165485	0.0764461	-2.16473	0.0304081	0.472413
74166	Tmem38a	transmembrane protein 38A	ENSMUSG00000031791	4738.92	-0.151359	0.0700168	-2.16176	0.030637	0.474818
114679	Selenom	selenoprotein M	ENSMUSG00000075702	1797.26	-0.166703	0.0770979	-2.16222	0.0306013	0.474818
99326	Garnl3	GTPase activating RANGAP domain-like 3	ENSMUSG00000038860	1228.27	-0.202426	0.0937027	-2.1603	0.0307494	0.475915
102278	Cpne7	copine VII	ENSMUSG00000034796	10010.5	0.154268	0.0714403	2.1594	0.0308192	0.475915
19336	Rab24	RAB24, member RAS oncogene family	ENSMUSG00000034789	1249.53	-0.171737	0.0795186	-2.15971	0.030795	0.475915
216856	Nlgn2	neuroligin 2	ENSMUSG00000051790	12942.3	-0.157588	0.0730313	-2.15782	0.0309421	0.476665
544817	Arhgap27	Rho GTPase activating protein 27	ENSMUSG00000034255	227.498	-0.227744	0.105537	-2.15795	0.0309317	0.476665
241525	Ypel4	yippee like 4	ENSMUSG00000034059	829.361	0.188806	0.0875411	2.15677	0.0310235	0.476773
240396	Mex3c	mex3 RNA binding family member C	ENSMUSG00000037253	1042.59	0.180553	0.0837006	2.15713	0.0309953	0.476773
114715	Spred1	sprouty protein with EVH-1 domain 1, related sequence	ENSMUSG00000027351	2146.74	-0.176123	0.0816916	-2.15595	0.0310878	0.477188
20356	Sema5a	sema domain, seven thrombospondin repeats (type 1 and type 1-like), transmembrane domain (TM) and short cytoplasmic domain, (semaphorin) 5A	ENSMUSG00000022231	2994.65	-0.147409	0.0683915	-2.15538	0.0311324	0.477301
80909	Gatsl2	GATS protein-like 2	ENSMUSG00000015944	4131.58	-0.188427	0.0874577	-2.1545	0.0312012	0.477785
16589	Uhmk1	U2AF homology motif (UHM) kinase 1	ENSMUSG00000026667	10171	-0.165734	0.0770248	-2.15169	0.0314216	0.477847
215707	Ccdc92	coiled-coil domain containing 92	ENSMUSG00000037979	2739.15	-0.156588	0.0727773	-2.1516	0.031429	0.477847
22411	Wnt11	wingless-type MMTV integration site family, member 11	ENSMUSG00000015957	43.4515	-0.196935	0.0915094	-2.15208	0.0313914	0.477847
69581	Rhou	ras homolog family member U	ENSMUSG00000039960	1168.5	-0.175798	0.081688	-2.15207	0.031392	0.477847
20370	Sez6	seizure related gene 6	ENSMUSG00000000632	12563.4	-0.141293	0.0656659	-2.15169	0.0314217	0.477847
12842	Col1a1	collagen, type I, alpha 1	ENSMUSG00000001506	72.1639	0.217706	0.101089	2.15361	0.0312706	0.477847
74342	Lrrtm1	leucine rich repeat transmembrane neuronal 1	ENSMUSG00000060780	5321.45	-0.145986	0.0678716	-2.15092	0.0314826	0.478095
74762	Mdga1	MAM domain containing glycosylphosphatidylinositol anchor 1	ENSMUSG00000043557	3881.14	-0.165534	0.0770329	-2.14888	0.0316443	0.479982
228829	Phf20	PHD finger protein 20	ENSMUSG00000038116	1748.76	-0.165423	0.0770519	-2.1469	0.0318009	0.481219
238673	Zfp367	zinc finger protein 367	ENSMUSG00000044934	245.186	0.228374	0.106351	2.14736	0.0317644	0.481219
26950	Vsnl1	visinin-like 1	ENSMUSG00000054459	17456.9	-0.132063	0.0615689	-2.14496	0.0319564	0.483001
52357	Wwc2	WW, C2 and coiled-coil domain containing 2	ENSMUSG00000031563	1775.1	-0.16776	0.0783276	-2.14177	0.0322121	0.485779
67433	Ccdc127	coiled-coil domain containing 127	ENSMUSG00000021578	1912.47	-0.153865	0.071842	-2.14172	0.032216	0.485779
103967	Dnm3	dynamin 3	ENSMUSG00000040265	2245.24	0.159671	0.0746433	2.13912	0.0324262	0.486089
99151	Cercam	cerebral endothelial cell adhesion molecule	ENSMUSG00000039787	52.8309	0.21387	0.0999798	2.13913	0.0324249	0.486089
67035	Dnajb4	DnaJ heat shock protein family (Hsp40) member B4	ENSMUSG00000028035	1675.68	0.158217	0.0739239	2.14026	0.0323334	0.486089
27375	Tjp3	tight junction protein 3	ENSMUSG00000034917	68.6623	0.223098	0.104287	2.13926	0.0324146	0.486089
212398	Frat2	frequently rearranged in advanced T cell lymphomas 2	ENSMUSG00000047604	711.157	0.19023	0.0889041	2.13972	0.0323775	0.486089
54616	Extl3	exostoses (multiple)-like 3	ENSMUSG00000021978	4419.35	-0.163699	0.0765922	-2.13728	0.0325751	0.487566
22701	Zfp41	zinc finger protein 41	ENSMUSG00000047003	289.499	0.216123	0.101136	2.13697	0.0326008	0.487566
64378	Gpr88	G-protein coupled receptor 88	ENSMUSG00000068696	174.927	-0.229129	0.107287	-2.13565	0.032708	0.488599
228662	Btbd3	BTB (POZ) domain containing 3	ENSMUSG00000062098	5664.39	-0.151525	0.0710011	-2.13412	0.0328333	0.4899
268448	Phf12	PHD finger protein 12	ENSMUSG00000037791	1199.21	-0.172976	0.0810727	-2.13359	0.0328764	0.489974
229512	Smg5	Smg-5 homolog, nonsense mediated mRNA decay factor (C. elegans)	ENSMUSG00000001415	2005.62	-0.157569	0.073918	-2.13167	0.0330338	0.491747
76192	Abhd12	abhydrolase domain containing 12	ENSMUSG00000032046	7648.65	-0.132017	0.0620093	-2.12899	0.0332548	0.494229
20620	Plk2	polo like kinase 2	ENSMUSG00000021701	10532.8	-0.15349	0.0721046	-2.12872	0.0332776	0.494229
50785	Hs6st1	heparan sulfate 6-O-sulfotransferase 1	ENSMUSG00000045216	2766.66	-0.171881	0.0808345	-2.12634	0.0334753	0.49611
54219	Cd320	CD320 antigen	ENSMUSG00000002308	197.707	-0.225898	0.106242	-2.12626	0.0334817	0.49611
20608	Sstr4	somatostatin receptor 4	ENSMUSG00000037014	583.422	-0.212122	0.0998073	-2.12532	0.0335603	0.4967
77371	Sec24a	Sec24 related gene family, member A (S. cerevisiae)	ENSMUSG00000036391	299.311	0.215136	0.101303	2.12368	0.0336971	0.49815
226970	Arhgef4	Rho guanine nucleotide exchange factor (GEF) 4	ENSMUSG00000037509	7107.34	-0.138058	0.0651054	-2.12053	0.0339614	0.499842
243842	Bicra	BRD4 interacting chromatin remodeling complex associated protein	ENSMUSG00000070808	978.473	-0.199398	0.093989	-2.1215	0.0338798	0.499842
16578	Kif9	kinesin family member 9	ENSMUSG00000032489	120.072	0.228594	0.107796	2.12063	0.0339533	0.499842
238130	Dock4	dedicator of cytokinesis 4	ENSMUSG00000035954	8233.33	0.14794	0.0697678	2.12046	0.0339676	0.499842
170731	Mfn2	mitofusin 2	ENSMUSG00000029020	10027.1	-0.143936	0.0679434	-2.11847	0.034135	0.501729
435376	Atp6ap1l	ATPase, H+ transporting, lysosomal accessory protein 1-like	ENSMUSG00000078958	31.601	-0.179168	0.0846306	-2.11706	0.0342546	0.502912
22673	Zfp185	zinc finger protein 185	ENSMUSG00000031351	31.0054	0.185694	0.0878349	2.11413	0.0345042	0.505996
72935	Ddx41	DEAD (Asp-Glu-Ala-Asp) box polypeptide 41	ENSMUSG00000021494	699.275	-0.1808	0.0855922	-2.11235	0.0346566	0.50765
14775	Gpx1	glutathione peroxidase 1	ENSMUSG00000063856	555.555	-0.194315	0.0920276	-2.11148	0.0347307	0.508154
78267	Klhdc8b	kelch domain containing 8B	ENSMUSG00000032609	294.181	-0.21477	0.101747	-2.11081	0.0347883	0.508417
71101	Uvssa	UV stimulated scaffold protein A	ENSMUSG00000037355	128.968	0.22737	0.107786	2.10946	0.0349045	0.508955
17988	Ndrg1	N-myc downstream regulated gene 1	ENSMUSG00000005125	1452.94	0.170461	0.0808004	2.10966	0.0348878	0.508955
94246	Arid4b	AT rich interactive domain 4B (RBP1-like)	ENSMUSG00000039219	964.919	0.173194	0.0821755	2.10761	0.0350646	0.510708
21754	Tesk1	testis specific protein kinase 1	ENSMUSG00000028458	2357.55	-0.150942	0.0717043	-2.10506	0.0352863	0.512772
230868	Igsf21	immunoglobulin superfamily, member 21	ENSMUSG00000040972	2901.83	0.154668	0.0734603	2.10546	0.0352512	0.512772
109934	Abr	active BCR-related gene	ENSMUSG00000017631	28496.6	-0.151898	0.0722207	-2.10325	0.0354437	0.514476
85030	Tnfrsf25	tumor necrosis factor receptor superfamily, member 25	ENSMUSG00000024793	48.5409	0.189953	0.090334	2.10279	0.0354845	0.514486
211134	Lzts1	leucine zipper, putative tumor suppressor 1	ENSMUSG00000036306	2276.43	-0.149515	0.0711423	-2.10163	0.0355857	0.51537
320974	Lrrn4	leucine rich repeat neuronal 4	ENSMUSG00000043110	56.0025	-0.212983	0.101366	-2.10113	0.0356292	0.515417
192287	Slc25a36	solute carrier family 25, member 36	ENSMUSG00000032449	1049.22	0.171546	0.0817192	2.09921	0.0357985	0.517282
20666	Sox11	SRY (sex determining region Y)-box 11	ENSMUSG00000063632	540.329	0.209632	0.099896	2.0985	0.0358611	0.517603
338365	Slc41a2	solute carrier family 41, member 2	ENSMUSG00000034591	1025.98	0.170911	0.0815198	2.09656	0.0360328	0.519497
104248	Cabin1	calcineurin binding protein 1	ENSMUSG00000020196	2417	0.150659	0.071893	2.09559	0.0361183	0.520144
68151	Wls	wntless WNT ligand secretion mediator	ENSMUSG00000028173	214.508	0.220621	0.105418	2.09283	0.0363644	0.521929
20185	Ncor1	nuclear receptor co-repressor 1	ENSMUSG00000018501	7785.41	-0.171356	0.0818487	-2.09357	0.0362986	0.521929
76972	Snhg20	small nucleolar RNA host gene 20	ENSMUSG00000086859	61.1696	0.207207	0.0989901	2.09321	0.0363302	0.521929
50926	Hnrnpdl	heterogeneous nuclear ribonucleoprotein D-like	ENSMUSG00000029328	3188.49	-0.146747	0.0701355	-2.09234	0.0364081	0.521972
79555	BC005537	cDNA sequence BC005537	ENSMUSG00000019132	4773.79	-0.154429	0.0738954	-2.08983	0.0366328	0.524244
239510	Phf20l1	PHD finger protein 20-like 1	ENSMUSG00000072501	1355.04	0.16217	0.077606	2.08966	0.0366484	0.524244
20091	Rps3a1	ribosomal protein S3A1	ENSMUSG00000028081	2339.7	0.170039	0.0814096	2.08868	0.0367362	0.52433
24066	Spry4	sprouty RTK signaling antagonist 4	ENSMUSG00000024427	531.132	-0.208163	0.0996493	-2.08896	0.0367113	0.52433
27357	Gyg	glycogenin	ENSMUSG00000019528	1214.55	0.167069	0.0800374	2.08739	0.0368532	0.524906
232944	Mark4	MAP/microtubule affinity regulating kinase 4	ENSMUSG00000030397	6227.74	-0.13776	0.0659983	-2.08733	0.0368585	0.524906
12889	Cplx1	complexin 1	ENSMUSG00000033615	17290.7	0.12611	0.0604548	2.08603	0.0369763	0.525999
66713	Actr2	ARP2 actin-related protein 2	ENSMUSG00000020152	17070.2	-0.130435	0.0625494	-2.08531	0.0370409	0.526334
329274	Fam163a	family with sequence similarity 163, member A	ENSMUSG00000015484	239.853	-0.224559	0.10773	-2.08446	0.0371181	0.526698
22704	Zfp46	zinc finger protein 46	ENSMUSG00000051351	2682.45	-0.162438	0.0780022	-2.08248	0.0372988	0.526698
230861	Eif4g3	eukaryotic translation initiation factor 4 gamma, 3	ENSMUSG00000028760	11219.7	-0.174642	0.0838657	-2.08241	0.0373053	0.526698
67186	Rplp2	ribosomal protein, large P2	ENSMUSG00000025508	1591.27	-0.159909	0.0767298	-2.08405	0.0371552	0.526698
234624	A330008L17Rik	RIKEN cDNA A330008L17 gene	ENSMUSG00000052479	190.848	-0.220886	0.106073	-2.08239	0.0373068	0.526698
94091	Trim11	tripartite motif-containing 11	ENSMUSG00000020455	622.798	0.182368	0.0875792	2.08232	0.0373131	0.526698
236733	Usp11	ubiquitin specific peptidase 11	ENSMUSG00000031066	5003.33	0.134183	0.0644651	2.08148	0.0373896	0.527198
116873	Stim2	stromal interaction molecule 2	ENSMUSG00000039156	5632.78	0.140115	0.0674218	2.07818	0.0376923	0.52843
15289	Hmgb1	high mobility group box 1	ENSMUSG00000066551	3418.67	0.157447	0.0758722	2.07516	0.0379718	0.52843
100862258	Gm21596	predicted gene, 21596	ENSMUSG00000066551	3418.67	0.157447	0.0758722	2.07516	0.0379718	0.52843
18025	Nfe2l3	nuclear factor, erythroid derived 2, like 3	ENSMUSG00000029832	73.0723	0.214431	0.103191	2.07799	0.0377102	0.52843
71835	Lancl2	LanC (bacterial lantibiotic synthetase component C)-like 2	ENSMUSG00000062190	3750.17	0.15091	0.0726412	2.07748	0.0377574	0.52843
18205	Ntf3	neurotrophin 3	ENSMUSG00000049107	155.995	-0.223394	0.107538	-2.07734	0.0377704	0.52843
21351	Taldo1	transaldolase 1	ENSMUSG00000025503	2437.31	-0.147435	0.0710026	-2.07648	0.03785	0.52843
330788	Zfp866	zinc finger protein 866	ENSMUSG00000043090	509.91	0.189592	0.091272	2.07722	0.0377811	0.52843
22418	Wnt5a	wingless-type MMTV integration site family, member 5A	ENSMUSG00000021994	143.992	0.223584	0.107637	2.07719	0.0377838	0.52843
20556	Slfn2	schlafen 2	ENSMUSG00000072620	37.7795	-0.190957	0.0919628	-2.07645	0.0378519	0.52843
54562	Lrrc6	leucine rich repeat containing 6 (testis)	ENSMUSG00000022375	97.9274	0.222379	0.107123	2.07592	0.0379018	0.52843
12053	Bcl6	B cell leukemia/lymphoma 6	ENSMUSG00000022508	2137.86	-0.159364	0.0767904	-2.07531	0.0379581	0.52843
18546	Pcp4	Purkinje cell protein 4	ENSMUSG00000090223	798.037	-0.177392	0.0852973	-2.07969	0.0375536	0.52843
29812	Ndrg3	N-myc downstream regulated gene 3	ENSMUSG00000027634	27339.5	-0.13686	0.0659794	-2.07429	0.0380524	0.528978
27999	Fam3c	family with sequence similarity 3, member C	ENSMUSG00000029672	1385.44	-0.161983	0.0781356	-2.0731	0.0381628	0.529937
11490	Adam15	a disintegrin and metallopeptidase domain 15 (metargidin)	ENSMUSG00000028041	2756.83	0.141721	0.0684157	2.07147	0.0383145	0.529937
99681	Tchh	trichohyalin	ENSMUSG00000052415	72.3556	-0.21494	0.103736	-2.07199	0.0382666	0.529937
108030	Lin7a	lin-7 homolog A (C. elegans)	ENSMUSG00000019906	425.31	-0.212992	0.102829	-2.07133	0.0383281	0.529937
20317	Serpinf1	serine (or cysteine) peptidase inhibitor, clade F, member 1	ENSMUSG00000000753	429.175	0.20413	0.0985471	2.07139	0.0383221	0.529937
77531	Anks1b	ankyrin repeat and sterile alpha motif domain containing 1B	ENSMUSG00000058589	13189.2	-0.126315	0.0610154	-2.07022	0.0384322	0.530803
19419	Rasgrp1	RAS guanyl releasing protein 1	ENSMUSG00000027347	25873.8	-0.131057	0.0633513	-2.06874	0.0385707	0.532143
29809	Rabgap1l	RAB GTPase activating protein 1-like	ENSMUSG00000026721	5438.11	0.139112	0.0672969	2.06714	0.0387214	0.533647
67071	Rps6ka6	ribosomal protein S6 kinase polypeptide 6	ENSMUSG00000025665	164.447	0.221116	0.107097	2.06464	0.038957	0.534595
230863	Sh2d5	SH2 domain containing 5	ENSMUSG00000045349	1618.05	-0.152829	0.0740137	-2.06487	0.0389353	0.534595
243312	Elfn1	leucine rich repeat and fibronectin type III, extracellular 1	ENSMUSG00000048988	249.175	-0.218641	0.105851	-2.06555	0.0388706	0.534595
NA	NA	NA	ENSMUSG00000079941	43.7397	0.184246	0.0892018	2.0655	0.0388761	0.534595
52637	Cisd1	CDGSH iron sulfur domain 1	ENSMUSG00000037710	1819.56	-0.160093	0.077593	-2.06324	0.0390896	0.534919
14009	Etv1	ets variant 1	ENSMUSG00000004151	5285.3	-0.152107	0.0737285	-2.06307	0.0391058	0.534919
66972	Slc25a23	solute carrier family 25 (mitochondrial carrier; phosphate carrier), member 23	ENSMUSG00000046329	7583.16	-0.177866	0.0861955	-2.06352	0.0390633	0.534919
72826	Fam76b	family with sequence similarity 76, member B	ENSMUSG00000037808	180.635	0.221005	0.107203	2.06156	0.03925	0.5353
27008	Micall1	microtubule associated monooxygenase, calponin and LIM domain containing -like 1	ENSMUSG00000033039	976.048	0.197403	0.0957586	2.06146	0.039259	0.5353
210741	Kcnk12	potassium channel, subfamily K, member 12	ENSMUSG00000050138	560.793	-0.204603	0.0992378	-2.06175	0.039232	0.5353
22350	Ezr	ezrin	ENSMUSG00000052397	185.341	0.220651	0.107156	2.05916	0.039479	0.537729
208968	Zfp280c	zinc finger protein 280C	ENSMUSG00000036916	189.47	0.219317	0.106578	2.0578	0.0396095	0.538369
268481	Krt222	keratin 222	ENSMUSG00000035849	1532.08	-0.157702	0.0766365	-2.05779	0.0396101	0.538369
22761	Zfpm1	zinc finger protein, multitype 1	ENSMUSG00000049577	1217.15	-0.169107	0.0822148	-2.05689	0.0396966	0.538975
16508	Kcnd2	potassium voltage-gated channel, Shal-related family, member 2	ENSMUSG00000060882	5117.94	-0.132133	0.0642595	-2.05624	0.039759	0.53925
NA	NA	NA	ENSMUSG00000063235	354.573	-0.206547	0.100496	-2.05527	0.0398532	0.539386
18099	Nlk	nemo like kinase	ENSMUSG00000017376	1766.19	-0.157027	0.0763995	-2.05534	0.0398463	0.539386
72289	Malat1	metastasis associated lung adenocarcinoma transcript 1 (non-coding RNA)	ENSMUSG00000092341	509.743	0.212373	0.103361	2.05468	0.0399096	0.53958
241656	Pak7	p21 protein (Cdc42/Rac)-activated kinase 7	ENSMUSG00000039913	1019.57	-0.163513	0.0796343	-2.0533	0.0400439	0.540255
17957	Napb	N-ethylmaleimide sensitive fusion protein attachment protein beta	ENSMUSG00000027438	24177.1	-0.137256	0.0668389	-2.05354	0.0400205	0.540255
16601	Klf9	Kruppel-like factor 9	ENSMUSG00000033863	6604.83	-0.162194	0.079038	-2.0521	0.04016	0.541252
16001	Igf1r	insulin-like growth factor I receptor	ENSMUSG00000005533	1348.98	-0.182029	0.0888175	-2.04948	0.0404157	0.541849
76453	Prss23	protease, serine 23	ENSMUSG00000039405	447.876	-0.199524	0.0973122	-2.05035	0.0403303	0.541849
20922	Supt4a	suppressor of Ty 4A	ENSMUSG00000020485	628.457	-0.184085	0.0898023	-2.04989	0.0403754	0.541849
100041294	Supt4b	suppressor of Ty 4B	ENSMUSG00000020485	628.457	-0.184085	0.0898023	-2.04989	0.0403754	0.541849
217201	Rundc1	RUN domain containing 1	ENSMUSG00000035007	1535.41	-0.157448	0.0768008	-2.05008	0.0403563	0.541849
328162	Trmt61a	tRNA methyltransferase 61A	ENSMUSG00000060950	652.048	-0.181013	0.0883203	-2.04951	0.0404127	0.541849
235130	Adamts15	a disintegrin-like and metallopeptidase (reprolysin type) with thrombospondin type 1 motif, 15	ENSMUSG00000033453	83.0565	0.217314	0.106119	2.04782	0.0405772	0.542879
19009	Pou6f1	POU domain, class 6, transcription factor 1	ENSMUSG00000009739	2196.55	-0.15536	0.0758597	-2.04799	0.0405613	0.542879
14758	Gpm6b	glycoprotein m6b	ENSMUSG00000031342	23079.8	0.139493	0.0681418	2.04709	0.040649	0.543272
11783	Apaf1	apoptotic peptidase activating factor 1	ENSMUSG00000019979	608.398	0.180077	0.0880228	2.04579	0.0407767	0.544411
17965	Nbl1	neuroblastoma, suppression of tumorigenicity 1	ENSMUSG00000041120	2379.6	0.157617	0.0771077	2.04411	0.0409429	0.544927
107686	Snrpd2	small nuclear ribonucleoprotein D2	ENSMUSG00000040824	992.407	-0.164985	0.080704	-2.04432	0.0409219	0.544927
77920	A330102I10Rik	RIKEN cDNA A330102I10 gene	ENSMUSG00000086363	57.3371	-0.207394	0.101417	-2.04496	0.0408588	0.544927
NA	NA	NA	ENSMUSG00000085133	959.499	-0.185732	0.0908853	-2.04359	0.040994	0.545041
12955	Cryab	crystallin, alpha B	ENSMUSG00000032060	175.451	-0.219245	0.107492	-2.03963	0.0413869	0.548558
52715	Ccdc43	coiled-coil domain containing 43	ENSMUSG00000020925	796.004	-0.173176	0.0848744	-2.04039	0.0413119	0.548558
105844	Card10	caspase recruitment domain family, member 10	ENSMUSG00000033170	100.368	-0.218949	0.107344	-2.03971	0.0413794	0.548558
22158	Tulp3	tubby-like protein 3	ENSMUSG00000001521	224.274	0.213619	0.104801	2.03833	0.0415171	0.549218
76108	Rap2a	RAS related protein 2a	ENSMUSG00000051615	4362.58	-0.141105	0.0692277	-2.03828	0.0415224	0.549218
99010	Lpcat4	lysophosphatidylcholine acyltransferase 4	ENSMUSG00000027134	1735.14	-0.162459	0.0797555	-2.03696	0.0416537	0.550387
192166	Sardh	sarcosine dehydrogenase	ENSMUSG00000009614	80.4957	0.211721	0.103996	2.03586	0.0417642	0.550712
319876	Cobll1	Cobl-like 1	ENSMUSG00000034903	81.4385	-0.214954	0.105569	-2.03615	0.041735	0.550712
67703	Kirrel3	kirre like nephrin family adhesion molecule 3	ENSMUSG00000032036	1781.04	0.153609	0.0755142	2.03417	0.0419341	0.552383
110078	Pygb	brain glycogen phosphorylase	ENSMUSG00000033059	5336.17	0.155232	0.0763471	2.03324	0.0420279	0.55284
NA	NA	NA	ENSMUSG00000106651	58.9488	-0.20669	0.101669	-2.03298	0.042055	0.55284
232906	Arhgap35	Rho GTPase activating protein 35	ENSMUSG00000058230	7873.06	-0.171019	0.0841472	-2.03237	0.0421157	0.553071
114874	Ddhd1	DDHD domain containing 1	ENSMUSG00000037697	1569.04	-0.160694	0.0791817	-2.02943	0.0424144	0.556424
546134	Gramd2	GRAM domain containing 2	ENSMUSG00000074259	247.241	-0.210896	0.104015	-2.02756	0.0426054	0.558357
545428	Ccdc141	coiled-coil domain containing 141	ENSMUSG00000044033	53.6665	0.196221	0.0971105	2.0206	0.0433214	0.562357
14260	Fmn1	formin 1	ENSMUSG00000044042	133.068	-0.217697	0.107793	-2.01957	0.0434279	0.562357
277360	Prex1	phosphatidylinositol-3,4,5-trisphosphate-dependent Rac exchange factor 1	ENSMUSG00000039621	1608.36	-0.159069	0.0786899	-2.02147	0.0432313	0.562357
15560	Htr2c	5-hydroxytryptamine (serotonin) receptor 2C	ENSMUSG00000041380	2236.56	0.153928	0.0760579	2.02383	0.0429873	0.562357
NA	NA	NA	ENSMUSG00000104597	3695.23	-0.156645	0.0774773	-2.02182	0.0431954	0.562357
381582	Tmem240	transmembrane protein 240	ENSMUSG00000084845	1000.4	-0.195844	0.0968358	-2.02243	0.0431318	0.562357
231430	Cox18	cytochrome c oxidase assembly protein 18	ENSMUSG00000035505	479.902	0.203039	0.100497	2.02035	0.0433474	0.562357
23790	Coro1c	coronin, actin binding protein 1C	ENSMUSG00000004530	3666.6	-0.179356	0.0886511	-2.02317	0.0430557	0.562357
71772	Plbd2	phospholipase B domain containing 2	ENSMUSG00000029598	2101	-0.15544	0.0769341	-2.02043	0.043339	0.562357
16795	Large1	LARGE xylosyl- and glucuronyltransferase 1	ENSMUSG00000004383	6377.32	-0.140163	0.0694308	-2.01874	0.0435146	0.562357
20660	Sorl1	sortilin-related receptor, LDLR class A repeats-containing	ENSMUSG00000049313	13815.4	-0.167479	0.0829042	-2.02015	0.0433673	0.562357
13385	Dlg4	discs large MAGUK scaffold protein 4	ENSMUSG00000020886	41305.4	-0.129114	0.063961	-2.01864	0.0435249	0.562357
170729	Scrt1	scratch family zinc finger 1	ENSMUSG00000048385	2679.27	-0.158044	0.0781736	-2.0217	0.0432069	0.562357
11877	Arvcf	armadillo repeat gene deleted in velocardiofacial syndrome	ENSMUSG00000000325	1826.94	0.153367	0.0759664	2.01888	0.0434993	0.562357
226751	Cdc42bpa	CDC42 binding protein kinase alpha	ENSMUSG00000026490	7239.88	-0.171252	0.0848906	-2.01732	0.0436617	0.562424
20661	Sort1	sortilin 1	ENSMUSG00000068747	25024.8	-0.130023	0.0644412	-2.0177	0.0436223	0.562424
216742	Fnip1	folliculin interacting protein 1	ENSMUSG00000035992	960.593	0.169745	0.0841237	2.0178	0.0436118	0.562424
277432	Vstm2l	V-set and transmembrane domain containing 2-like	ENSMUSG00000037843	2741.33	-0.182351	0.0904733	-2.01552	0.0438503	0.5627
30937	Lmcd1	LIM and cysteine-rich domains 1	ENSMUSG00000057604	49.6028	0.196738	0.0976561	2.0146	0.0439466	0.5627
386655	Eid2	EP300 interacting inhibitor of differentiation 2	ENSMUSG00000046058	1946.76	-0.188583	0.0935505	-2.01584	0.0438163	0.5627
100038725	Cep85l	centrosomal protein 85-like	ENSMUSG00000038594	491.596	0.184727	0.0916838	2.01483	0.0439223	0.5627
78100	Msantd4	Myb/SANT-like DNA-binding domain containing 4 with coiled-coils	ENSMUSG00000041124	1827.21	0.153793	0.0763309	2.01482	0.0439236	0.5627
106931	Kctd1	potassium channel tetramerisation domain containing 1	ENSMUSG00000036225	2208.98	-0.152016	0.0753787	-2.01669	0.0437277	0.5627
66540	Fam107b	family with sequence similarity 107, member B	ENSMUSG00000026655	217.303	0.215143	0.10683	2.01388	0.0440223	0.563107
329251	Ppp1r12b	protein phosphatase 1, regulatory (inhibitor) subunit 12B	ENSMUSG00000073557	5536.32	-0.160976	0.0799894	-2.01246	0.0441712	0.563325
107515	Lgr4	leucine-rich repeat-containing G protein-coupled receptor 4	ENSMUSG00000050199	474.186	-0.187112	0.0929586	-2.01285	0.0441305	0.563325
66377	Ndufc1	NADH dehydrogenase (ubiquinone) 1, subcomplex unknown, 1	ENSMUSG00000037152	712.365	-0.188283	0.0935224	-2.01324	0.0440897	0.563325
17933	Myt1l	myelin transcription factor 1-like	ENSMUSG00000061911	9031.89	-0.138802	0.069028	-2.01081	0.044345	0.564981
NA	NA	NA	ENSMUSG00000110523	436.796	-0.191305	0.0951803	-2.00992	0.0444396	0.565623
22343	Lin7c	lin-7 homolog C (C. elegans)	ENSMUSG00000027162	2696.95	0.138975	0.0691829	2.00881	0.0445571	0.565995
22601	Yap1	yes-associated protein 1	ENSMUSG00000053110	150.262	-0.21651	0.107778	-2.00886	0.0445523	0.565995
16765	Stmn1	stathmin 1	ENSMUSG00000028832	6172.51	-0.153847	0.0766303	-2.00765	0.0446804	0.566438
231470	Fras1	Fraser extracellular matrix complex subunit 1	ENSMUSG00000034687	666.746	-0.187093	0.0931876	-2.0077	0.0446747	0.566438
104010	Cdh22	cadherin 22	ENSMUSG00000053166	702.438	-0.182185	0.0907729	-2.00704	0.0447457	0.566705
109019	Nabp1	nucleic acid binding protein 1	ENSMUSG00000026107	433.17	-0.199201	0.0994067	-2.0039	0.0450811	0.567212
100042480	Nhsl2	NHS-like 2	ENSMUSG00000079481	1375.24	-0.170605	0.0851666	-2.00319	0.0451565	0.567212
18762	Prkcz	protein kinase C, zeta	ENSMUSG00000029053	6387.27	-0.127608	0.0636677	-2.00428	0.0450403	0.567212
269788	Lhfpl4	lipoma HMGIC fusion partner-like protein 4	ENSMUSG00000042873	5738.28	-0.147189	0.0734864	-2.00294	0.045184	0.567212
20393	Sgk1	serum/glucocorticoid regulated kinase 1	ENSMUSG00000019970	1820.75	0.156873	0.0783182	2.00302	0.0451753	0.567212
16993	Lta4h	leukotriene A4 hydrolase	ENSMUSG00000015889	866.608	0.166325	0.0829361	2.00546	0.0449144	0.567212
239554	Foxred2	FAD-dependent oxidoreductase domain containing 2	ENSMUSG00000016552	276.946	-0.212531	0.106009	-2.00483	0.0449815	0.567212
21826	Thbs2	thrombospondin 2	ENSMUSG00000023885	138.699	0.215675	0.107607	2.00428	0.0450401	0.567212
20510	Slc1a1	solute carrier family 1 (neuronal/epithelial high affinity glutamate transporter, system Xag), member 1	ENSMUSG00000024935	6675.67	-0.135576	0.0676047	-2.00542	0.0449183	0.567212
72119	Tpx2	TPX2, microtubule-associated	ENSMUSG00000027469	35.1762	0.1828	0.0913047	2.00209	0.0452753	0.567801
14043	Ext2	exostoses (multiple) 2	ENSMUSG00000027198	1317.22	0.154789	0.0774325	1.99901	0.0456068	0.568621
74182	Gpcpd1	glycerophosphocholine phosphodiesterase 1	ENSMUSG00000027346	4118.76	0.135562	0.0677878	1.99981	0.0455212	0.568621
242864	Napepld	N-acyl phosphatidylethanolamine phospholipase D	ENSMUSG00000044968	912.491	0.17425	0.0870976	2.00063	0.0454325	0.568621
211232	Cpne9	copine family member IX	ENSMUSG00000030270	578.711	-0.186915	0.0935038	-1.99901	0.0456067	0.568621
192657	Ell2	elongation factor RNA polymerase II 2	ENSMUSG00000001542	519.104	-0.195458	0.0977271	-2.00003	0.0454965	0.568621
225392	Rell2	RELT-like 2	ENSMUSG00000044024	2297.82	-0.142459	0.0712212	-2.00024	0.0454747	0.568621
11421	Ace	angiotensin I converting enzyme (peptidyl-dipeptidase A) 1	ENSMUSG00000020681	263.111	-0.206651	0.1034	-1.99856	0.0456559	0.56868
22644	Rnf103	ring finger protein 103	ENSMUSG00000052656	1251.81	0.165522	0.082841	1.99807	0.0457089	0.568787
17433	Mobp	myelin-associated oligodendrocytic basic protein	ENSMUSG00000032517	1151.11	-0.180976	0.0905975	-1.99758	0.045762	0.568896
11924	Neurog2	neurogenin 2	ENSMUSG00000027967	79.4908	-0.206178	0.103261	-1.99667	0.0458607	0.569019
13056	Cyb561	cytochrome b-561	ENSMUSG00000019590	1725.35	-0.176283	0.0882713	-1.99706	0.045819	0.569019
235281	Scn3b	sodium channel, voltage-gated, type III, beta	ENSMUSG00000049281	10926.7	-0.141053	0.0706961	-1.9952	0.0460207	0.570451
67874	Rprm	reprimo, TP53 dependent G2 arrest mediator candidate	ENSMUSG00000075334	1223.37	-0.179273	0.0899913	-1.99211	0.0463589	0.572624
72640	Mex3a	mex3 RNA binding family member A	ENSMUSG00000074480	117.691	0.213325	0.107143	1.99103	0.0464778	0.572624
666060	Frmpd1	FERM and PDZ domain containing 1	ENSMUSG00000035615	110.734	-0.211954	0.106411	-1.99184	0.0463887	0.572624
109552	Sri	sorcin	ENSMUSG00000003161	1016.55	-0.16779	0.0842343	-1.99195	0.0463769	0.572624
NA	NA	NA	ENSMUSG00000107019	216.615	-0.209968	0.105469	-1.99081	0.0465019	0.572624
50794	Klf13	Kruppel-like factor 13	ENSMUSG00000052040	7903.47	-0.15098	0.075825	-1.99117	0.0464627	0.572624
67731	Fbxo32	F-box protein 32	ENSMUSG00000022358	128.868	-0.214556	0.107777	-1.99075	0.0465087	0.572624
245049	Myrip	myosin VIIA and Rab interacting protein	ENSMUSG00000041794	2568.18	-0.143036	0.0719099	-1.9891	0.0466904	0.574309
269116	Nfasc	neurofascin	ENSMUSG00000026442	7660.95	-0.170395	0.0857464	-1.9872	0.0469003	0.575235
170439	Elovl6	ELOVL family member 6, elongation of long chain fatty acids (yeast)	ENSMUSG00000041220	2398.16	-0.149292	0.0751144	-1.98753	0.0468641	0.575235
209966	Pgbd5	piggyBac transposable element derived 5	ENSMUSG00000050751	8096.43	-0.136026	0.0684375	-1.9876	0.0468564	0.575235
109689	Arrb1	arrestin, beta 1	ENSMUSG00000018909	5640.6	-0.141168	0.0710912	-1.98573	0.0470629	0.576678
11438	Chrna4	cholinergic receptor, nicotinic, alpha polypeptide 4	ENSMUSG00000027577	1536.75	-0.18204	0.0916935	-1.98531	0.0471102	0.576706
12564	Cdh8	cadherin 8	ENSMUSG00000036510	2383.65	-0.152398	0.0768195	-1.98385	0.0472728	0.577663
63828	Fn3k	fructosamine 3 kinase	ENSMUSG00000025175	485.26	-0.184724	0.0931163	-1.9838	0.0472785	0.577663
17847	Usp34	ubiquitin specific peptidase 34	ENSMUSG00000056342	3089.61	-0.150144	0.0757355	-1.98248	0.0474252	0.578353
240613	9930021J03Rik	RIKEN cDNA 9930021J03 gene	ENSMUSG00000046138	713.721	-0.181504	0.0915474	-1.98263	0.0474089	0.578353
21847	Klf10	Kruppel-like factor 10	ENSMUSG00000037465	1655.69	0.163422	0.0824722	1.98154	0.0475308	0.57909
14651	Hagh	hydroxyacyl glutathione hydrolase	ENSMUSG00000024158	2337.82	-0.141603	0.0714969	-1.98055	0.0476423	0.579897
67389	C1qtnf12	C1q and tumor necrosis factor related 12	ENSMUSG00000023571	290.389	-0.199474	0.100787	-1.97916	0.047798	0.581241
320717	Pptc7	PTC7 protein phosphatase homolog	ENSMUSG00000038582	1643.93	-0.152355	0.0770348	-1.97774	0.0479583	0.582637
381126	Garem1	GRB2 associated regulator of MAPK1 subtype 1	ENSMUSG00000042680	1943.9	-0.172936	0.0874594	-1.97733	0.0480043	0.582644
74525	Fam234b	family with sequence similarity 234, member B	ENSMUSG00000030207	5959.02	-0.1314	0.0664808	-1.97651	0.0480967	0.582661
68423	Ankrd13d	ankyrin repeat domain 13 family, member D	ENSMUSG00000005986	1656.46	-0.155519	0.0786782	-1.97664	0.048082	0.582661
66928	Dmac1	distal membrane arm assembly complex 1	ENSMUSG00000028398	553.791	-0.185685	0.093983	-1.97573	0.0481851	0.583049
26432	Plod2	procollagen lysine, 2-oxoglutarate 5-dioxygenase 2	ENSMUSG00000032374	65.6363	0.201697	0.102103	1.97543	0.0482197	0.583049
66787	Gskip	GSK3B interacting protein	ENSMUSG00000044715	701.129	-0.178285	0.0903554	-1.97315	0.0484785	0.585626
70536	Qpct	glutaminyl-peptide cyclotransferase (glutaminyl cyclase)	ENSMUSG00000024084	170.323	0.211574	0.107256	1.9726	0.0485415	0.585835
20687	Sp3	trans-acting transcription factor 3	ENSMUSG00000027109	1160.46	0.15729	0.0798031	1.97097	0.0487275	0.587207
20312	Cx3cl1	chemokine (C-X3-C motif) ligand 1	ENSMUSG00000031778	43117	-0.124433	0.0631381	-1.9708	0.0487468	0.587207
14369	Fzd7	frizzled class receptor 7	ENSMUSG00000041075	348.15	0.196915	0.100106	1.96706	0.0491758	0.588624
18227	Nr4a2	nuclear receptor subfamily 4, group A, member 2	ENSMUSG00000026826	3550.43	-0.151608	0.0770443	-1.9678	0.0490907	0.588624
230903	Fbxo44	F-box protein 44	ENSMUSG00000029001	1385.14	-0.153756	0.0781502	-1.96744	0.049132	0.588624
192734	Lrrc75b	leucine rich repeat containing 75B	ENSMUSG00000046807	321.08	0.200003	0.101642	1.96772	0.0491008	0.588624
319984	Jph4	junctophilin 4	ENSMUSG00000022208	19671.3	-0.122207	0.0621043	-1.96777	0.0490947	0.588624
54394	Crlf3	cytokine receptor-like factor 3	ENSMUSG00000017561	272.289	0.198873	0.101071	1.96765	0.0491083	0.588624
319719	Simc1	SUMO-interacting motifs containing 1	ENSMUSG00000043183	294.126	0.197296	0.100304	1.96698	0.049186	0.588624
13046	Celf1	CUGBP, Elav-like family member 1	ENSMUSG00000005506	6665.62	-0.140777	0.0716874	-1.96376	0.0495584	0.591436
432530	Adcy1	adenylate cyclase 1	ENSMUSG00000020431	17420.4	-0.211519	0.107727	-1.96347	0.049591	0.591436
67393	Cxxc5	CXXC finger 5	ENSMUSG00000046668	2858.56	0.149028	0.0758748	1.96414	0.0495144	0.591436
93891	Pcdhb20	protocadherin beta 20	ENSMUSG00000046191	302.944	-0.202026	0.102899	-1.96335	0.0496055	0.591436
72611	Zfp655	zinc finger protein 655	ENSMUSG00000007812	907.169	0.164898	0.0840233	1.96252	0.0497015	0.59148
15566	Htr7	5-hydroxytryptamine (serotonin) receptor 7	ENSMUSG00000024798	272.806	-0.198622	0.101196	-1.96275	0.0496757	0.59148
19116	Prlr	prolactin receptor	ENSMUSG00000005268	72.1803	0.202751	0.103371	1.96139	0.0498335	0.592501
20183	Rxrg	retinoid X receptor gamma	ENSMUSG00000015843	226.227	0.206014	0.105096	1.96024	0.0499679	0.592999
319352	Pianp	PILR alpha associated neural protein	ENSMUSG00000030329	4809.04	-0.152498	0.0777891	-1.9604	0.0499493	0.592999
12345	Capzb	capping protein (actin filament) muscle Z-line, beta	ENSMUSG00000028745	9076.22	-0.122354	0.0624458	-1.95936	0.0500703	0.593439
93679	Trim8	tripartite motif-containing 8	ENSMUSG00000025034	2842.54	-0.150184	0.0766587	-1.95913	0.0500976	0.593439
212880	Ddx46	DEAD (Asp-Glu-Ala-Asp) box polypeptide 46	ENSMUSG00000021500	1213.75	-0.157541	0.0804305	-1.95872	0.050146	0.593464
74111	Rbm19	RNA binding motif protein 19	ENSMUSG00000029594	744.162	-0.175395	0.0895739	-1.95811	0.0502174	0.59376
227737	Fam129b	family with sequence similarity 129, member B	ENSMUSG00000026796	426.152	0.185913	0.0950639	1.95567	0.0505043	0.594462
231440	Parm1	prostate androgen-regulated mucin-like protein 1	ENSMUSG00000034981	2425.99	-0.141085	0.0721144	-1.9564	0.0504179	0.594462
26940	Ecsit	ECSIT signalling integrator	ENSMUSG00000066839	1294.61	-0.155395	0.0794456	-1.956	0.0504656	0.594462
22680	Zfp207	zinc finger protein 207	ENSMUSG00000017421	3217.21	0.134819	0.0689147	1.95632	0.0504279	0.594462
14705	Bscl2	Berardinelli-Seip congenital lipodystrophy 2 (seipin)	ENSMUSG00000071657	2310.76	0.152585	0.0780236	1.95563	0.0505087	0.594462
207911	Mchr1	melanin-concentrating hormone receptor 1	ENSMUSG00000050164	1287.38	-0.153177	0.0783996	-1.9538	0.0507251	0.596462
50754	Fbxw7	F-box and WD-40 domain protein 7	ENSMUSG00000028086	5784.21	-0.125811	0.0644245	-1.95285	0.0508373	0.596926
71720	Osbpl3	oxysterol binding protein-like 3	ENSMUSG00000029822	213.206	-0.209625	0.107353	-1.95268	0.0508577	0.596926
217125	Samd14	sterile alpha motif domain containing 14	ENSMUSG00000047181	2255.32	0.145227	0.0743932	1.95215	0.0509207	0.597118
14800	Gria2	glutamate receptor, ionotropic, AMPA2 (alpha 2)	ENSMUSG00000033981	20274.9	0.134687	0.0690131	1.95161	0.0509846	0.597322
98711	Rdh10	retinol dehydrogenase 10 (all-trans)	ENSMUSG00000025921	269.17	0.198955	0.102084	1.94892	0.0513046	0.598096
209815	Tbc1d25	TBC1 domain family, member 25	ENSMUSG00000039201	530.469	0.182826	0.0940067	1.94481	0.0517974	0.598096
12540	Cdc42	cell division cycle 42	ENSMUSG00000006699	11017.5	0.136905	0.0703315	1.94657	0.0515864	0.598096
433940	Fam222a	family with sequence similarity 222, member A	ENSMUSG00000041930	150.246	-0.209507	0.107674	-1.94576	0.051684	0.598096
70699	Nup205	nucleoporin 205	ENSMUSG00000038759	351.96	0.191189	0.0980744	1.94943	0.0512444	0.598096
243659	Styk1	serine/threonine/tyrosine kinase 1	ENSMUSG00000032899	53.7457	0.19219	0.0986963	1.94729	0.0515002	0.598096
20364	Selenow	selenoprotein W	ENSMUSG00000041571	13491.1	-0.150884	0.0775083	-1.94669	0.0515721	0.598096
101685	Spty2d1	SPT2, Suppressor of Ty, domain containing 1 (S. cerevisiae)	ENSMUSG00000049516	756.466	0.172708	0.0887599	1.94579	0.0516801	0.598096
628870	Otogl	otogelin-like	ENSMUSG00000091455	146.208	0.20953	0.1076	1.94731	0.0514978	0.598096
208898	Unc13c	unc-13 homolog C (C. elegans)	ENSMUSG00000062151	203.608	-0.209196	0.107439	-1.94712	0.0515207	0.598096
235584	Dusp7	dual specificity phosphatase 7	ENSMUSG00000053716	2119.41	-0.148771	0.0762839	-1.95023	0.0511483	0.598096
NA	NA	NA	ENSMUSG00000082286	186.963	-0.206129	0.105985	-1.94489	0.0517886	0.598096
72258	Kcnk10	potassium channel, subfamily K, member 10	ENSMUSG00000033854	453.111	0.200575	0.103105	1.94535	0.051733	0.598096
12864	Cox6c	cytochrome c oxidase subunit VIc	ENSMUSG00000014313	3882.42	-0.136668	0.0701455	-1.94836	0.0513724	0.598096
78309	Cul9	cullin 9	ENSMUSG00000040327	1802.09	0.154904	0.0794794	1.94899	0.0512972	0.598096
225994	Nmrk1	nicotinamide riboside kinase 1	ENSMUSG00000037847	161.041	0.207706	0.106788	1.94504	0.0517704	0.598096
227059	Slc39a10	solute carrier family 39 (zinc transporter), member 10	ENSMUSG00000025986	3817.65	-0.156994	0.0807494	-1.94421	0.0518702	0.598398
NA	NA	NA	ENSMUSG00000103400	56.3357	-0.194698	0.100201	-1.94308	0.0520066	0.59898
231004	Samd11	sterile alpha motif domain containing 11	ENSMUSG00000096351	75.1132	-0.120364	0.0619471	-1.94302	0.0520141	0.59898
73852	D3Ertd751e	DNA segment, Chr 3, ERATO Doi 751, expressed	ENSMUSG00000025766	191.785	-0.208258	0.10727	-1.94143	0.0522061	0.599394
219228	Pcdh17	protocadherin 17	ENSMUSG00000035566	2853.32	-0.144043	0.0741754	-1.94192	0.0521463	0.599394
104184	Blmh	bleomycin hydrolase	ENSMUSG00000020840	2115.83	0.143912	0.0741394	1.9411	0.052246	0.599394
223601	Fam49b	family with sequence similarity 49, member B	ENSMUSG00000022378	3493.14	-0.14707	0.0757783	-1.94079	0.0522839	0.599394
210573	Tmem151b	transmembrane protein 151B	ENSMUSG00000096847	6606.91	-0.159643	0.0822218	-1.94162	0.0521835	0.599394
330914	Arhgap32	Rho GTPase activating protein 32	ENSMUSG00000041444	4346.31	-0.142129	0.07327	-1.9398	0.0524045	0.60024
230696	AU022252	expressed sequence AU022252	ENSMUSG00000078584	1121.11	-0.164105	0.0846353	-1.93897	0.0525052	0.600856
246316	Lgi2	leucine-rich repeat LGI family, member 2	ENSMUSG00000039252	1615.97	-0.205734	0.106181	-1.93757	0.0526756	0.601822
14615	Gjc1	gap junction protein, gamma 1	ENSMUSG00000034520	69.402	0.200558	0.103522	1.93734	0.0527036	0.601822
67101	2310039H08Rik	RIKEN cDNA 2310039H08 gene	ENSMUSG00000062619	77.5379	0.202128	0.104344	1.93712	0.0527304	0.601822
19383	Raly	hnRNP-associated with lethal yellow	ENSMUSG00000027593	1694.38	0.153856	0.0794785	1.93582	0.0528893	0.602121
11733	Ank1	ankyrin 1, erythroid	ENSMUSG00000031543	667.886	-0.179554	0.0927552	-1.93578	0.0528945	0.602121
54393	Gabbr1	gamma-aminobutyric acid (GABA) B receptor, 1	ENSMUSG00000024462	22960.9	-0.117763	0.0608355	-1.93576	0.0528976	0.602121
52696	Zwint	ZW10 interactor	ENSMUSG00000019923	24508.8	0.13132	0.0678971	1.9341	0.0531009	0.603364
18212	Ntrk2	neurotrophic tyrosine kinase, receptor, type 2	ENSMUSG00000055254	8380.18	-0.152758	0.078971	-1.93436	0.053069	0.603364
67857	Ppp6c	protein phosphatase 6, catalytic subunit	ENSMUSG00000026753	1603.64	0.147811	0.076504	1.93207	0.0533503	0.605486
18133	Nov	nephroblastoma overexpressed gene	ENSMUSG00000037362	10620.3	-0.163847	0.0848148	-1.93182	0.0533822	0.605486
81018	Rnf114	ring finger protein 114	ENSMUSG00000006418	1019.7	-0.154471	0.0800014	-1.93086	0.0535004	0.605755
217166	Nr1d1	nuclear receptor subfamily 1, group D, member 1	ENSMUSG00000020889	2503.34	-0.14312	0.0741091	-1.93121	0.0534571	0.605755
76142	Ppp1r14c	protein phosphatase 1, regulatory (inhibitor) subunit 14c	ENSMUSG00000040653	1972.26	0.143754	0.0744841	1.92999	0.0536079	0.605902
72925	2021-03-01	membrane-associated ring finger (C3HC4) 1	ENSMUSG00000036469	1478.83	0.14545	0.0753552	1.93019	0.0535831	0.605902
76199	Med13l	mediator complex subunit 13-like	ENSMUSG00000018076	1872.58	-0.17055	0.0884027	-1.92924	0.0537011	0.60642
18799	Plcd1	phospholipase C, delta 1	ENSMUSG00000010660	80.4169	0.203816	0.10572	1.92789	0.0538694	0.607785
75404	Arhgap36	Rho GTPase activating protein 36	ENSMUSG00000036198	146.671	-0.207235	0.107576	-1.92641	0.0540533	0.608467
76799	Tmem234	transmembrane protein 234	ENSMUSG00000028797	1610.56	-0.149025	0.0773734	-1.92605	0.0540978	0.608467
66448	Mrpl20	mitochondrial ribosomal protein L20	ENSMUSG00000029066	1179.08	-0.157424	0.0817413	-1.92588	0.0541197	0.608467
21974	Top2b	topoisomerase (DNA) II beta	ENSMUSG00000017485	3266.31	0.134684	0.0699185	1.9263	0.054067	0.608467
353287	Clec18a	C-type lectin domain family 18, member A	ENSMUSG00000033633	85.3025	0.204472	0.106234	1.92473	0.0542634	0.608482
81535	Sgpp1	sphingosine-1-phosphate phosphatase 1	ENSMUSG00000021054	878.806	0.177245	0.0920727	1.92506	0.0542222	0.608482
66849	Ppp1r2	protein phosphatase 1, regulatory (inhibitor) subunit 2	ENSMUSG00000047714	2576.28	-0.142528	0.0740393	-1.92503	0.0542252	0.608482
243780	E330009J07Rik	RIKEN cDNA E330009J07 gene	ENSMUSG00000037172	1775.37	0.150469	0.0782758	1.92229	0.0545691	0.611374
103012	Firre	functional intergenic repeating RNA element	ENSMUSG00000085396	178.218	0.207104	0.107783	1.9215	0.0546689	0.611958
228607	Mavs	mitochondrial antiviral signaling protein	ENSMUSG00000037523	29.1383	0.166137	0.0865217	1.92018	0.054835	0.613281
112415	Zfp607b	zinc finger protein 607B	ENSMUSG00000057093	229.494	0.198821	0.103596	1.9192	0.0549588	0.613595
15184	Hdac5	histone deacetylase 5	ENSMUSG00000008855	4368.84	-0.134511	0.0700861	-1.91922	0.0549562	0.613595
211798	Mfsd9	major facilitator superfamily domain containing 9	ENSMUSG00000041945	181.367	0.204027	0.106449	1.91668	0.0552791	0.616634
19303	Pxn	paxillin	ENSMUSG00000029528	286.787	0.19924	0.104012	1.91555	0.0554228	0.617699
68339	Ccdc88c	coiled-coil domain containing 88C	ENSMUSG00000021182	1271.29	-0.177825	0.0929457	-1.91321	0.0557212	0.620485
26943	Serinc3	serine incorporator 3	ENSMUSG00000017707	6812.63	-0.123112	0.0643849	-1.91213	0.0558596	0.620948
243548	Prickle2	prickle planar cell polarity protein 2	ENSMUSG00000030020	13505.7	-0.140884	0.0736649	-1.9125	0.055812	0.620948
241846	Lsm14b	LSM family member 14B	ENSMUSG00000039108	3805.55	-0.159406	0.0834202	-1.91088	0.0560202	0.621117
13641	Efnb1	ephrin B1	ENSMUSG00000031217	435.05	0.179589	0.0939545	1.91144	0.0559475	0.621117
21664	Phlda1	pleckstrin homology like domain, family A, member 1	ENSMUSG00000020205	687.284	-0.171932	0.0899657	-1.91109	0.0559936	0.621117
12608	Cebpb	CCAAT/enhancer binding protein (C/EBP), beta	ENSMUSG00000056501	554.065	-0.160448	0.0840384	-1.90922	0.056234	0.62123
56195	Ptbp2	polypyrimidine tract binding protein 2	ENSMUSG00000028134	3698.03	0.127354	0.0666964	1.90946	0.0562029	0.62123
22027	Hsp90b1	heat shock protein 90, beta (Grp94), member 1	ENSMUSG00000020048	8765.76	0.123	0.0644432	1.90866	0.0563055	0.62123
239719	Mkl2	MKL/myocardin-like 2	ENSMUSG00000009569	7865.38	-0.159622	0.0836354	-1.90854	0.0563213	0.62123
27279	Tnfrsf12a	tumor necrosis factor receptor superfamily, member 12a	ENSMUSG00000023905	78.1894	0.199103	0.104261	1.90966	0.0561767	0.62123
68617	Mtcl1	microtubule crosslinking factor 1	ENSMUSG00000052105	723.209	-0.175357	0.0918755	-1.90864	0.0563092	0.62123
64138	Ctsz	cathepsin Z	ENSMUSG00000016256	177.919	-0.204633	0.10729	-1.90729	0.0564826	0.622474
214189	Scgn	secretagogin, EF-hand calcium binding protein	ENSMUSG00000021337	51.5719	-0.188621	0.0989676	-1.90589	0.0566643	0.62394
75740	Egfem1	EGF-like and EMI domain containing 1	ENSMUSG00000063600	180.994	-0.202564	0.106337	-1.90493	0.0567888	0.624239
20496	Slc12a2	solute carrier family 12, member 2	ENSMUSG00000024597	415.658	0.180783	0.0948852	1.90528	0.0567431	0.624239
101118	Tmem168	transmembrane protein 168	ENSMUSG00000029569	355.107	0.187037	0.0982701	1.9033	0.0570015	0.626039
94092	Trim16	tripartite motif-containing 16	ENSMUSG00000047821	34.9906	0.166038	0.0872944	1.90204	0.0571655	0.627303
66116	Nat8f1	N-acetyltransferase 8 (GCN5-related) family member 1	ENSMUSG00000057103	79.323	0.200587	0.105524	1.90087	0.057319	0.627441
330427	9330102E08Rik	RIKEN cDNA 9330102E08 gene	ENSMUSG00000107879	839.233	-0.157284	0.0827507	-1.9007	0.0573413	0.627441
72330	Klhl40	kelch-like 40	ENSMUSG00000074001	187.906	0.202153	0.106439	1.89924	0.0575335	0.627441
56699	Cdc42ep4	CDC42 effector protein (Rho GTPase binding) 4	ENSMUSG00000041598	368.067	0.1896	0.0998442	1.89896	0.0575697	0.627441
57266	Cxcl14	chemokine (C-X-C motif) ligand 14	ENSMUSG00000021508	159.107	0.200324	0.105456	1.8996	0.0574859	0.627441
69315	1700001L19Rik	RIKEN cDNA 1700001L19 gene	ENSMUSG00000021534	356.308	-0.187302	0.0985049	-1.90145	0.0572432	0.627441
320865	Cdh18	cadherin 18	ENSMUSG00000040420	376.402	-0.185978	0.097895	-1.89977	0.0574633	0.627441
16774	Lama3	laminin, alpha 3	ENSMUSG00000024421	55.1754	-0.187219	0.098542	-1.89989	0.0574471	0.627441
73652	2210408F21Rik	RIKEN cDNA 2210408F21 gene	ENSMUSG00000087380	102.754	-0.203655	0.10738	-1.89658	0.0578837	0.627635
27385	Magel2	melanoma antigen, family L, 2	ENSMUSG00000056972	242.517	0.195146	0.102824	1.89787	0.0577134	0.627635
103098	Slc6a15	solute carrier family 6 (neurotransmitter transporter), member 15	ENSMUSG00000019894	2209.13	-0.142629	0.0751839	-1.89707	0.0578188	0.627635
52468	Ctdsp2	CTD (carboxy-terminal domain, RNA polymerase II, polypeptide A) small phosphatase 2	ENSMUSG00000078429	1838.5	-0.142725	0.0752194	-1.89744	0.0577693	0.627635
117150	Pip4k2c	phosphatidylinositol-5-phosphate 4-kinase, type II, gamma	ENSMUSG00000025417	6348.25	-0.135475	0.0714357	-1.89645	0.0578999	0.627635
326618	Tpm4	tropomyosin 4	ENSMUSG00000031799	236.011	0.197043	0.103911	1.89628	0.0579236	0.627635
330814	Adgrl1	adhesion G protein-coupled receptor L1	ENSMUSG00000013033	23634.9	-0.139539	0.0735879	-1.89623	0.0579302	0.627635
240913	Adamts4	a disintegrin-like and metallopeptidase (reprolysin type) with thrombospondin type 1 motif, 4	ENSMUSG00000006403	119.353	-0.202507	0.106885	-1.89463	0.0581411	0.629387
75141	Rasd2	RASD family, member 2	ENSMUSG00000034472	2109.12	-0.146873	0.0775968	-1.89278	0.0583876	0.63099
223697	Sun2	Sad1 and UNC84 domain containing 2	ENSMUSG00000042524	372.974	-0.18909	0.0998992	-1.89281	0.0583836	0.63099
329977	Fhad1	forkhead-associated (FHA) phosphopeptide binding domain 1	ENSMUSG00000051435	76.1549	-0.196423	0.103818	-1.89199	0.0584924	0.631058
68564	Nufip2	nuclear fragile X mental retardation protein interacting protein 2	ENSMUSG00000037857	908.317	0.159678	0.0843962	1.892	0.0584905	0.631058
245860	Atg9a	autophagy related 9A	ENSMUSG00000033124	3001.81	-0.149723	0.0791587	-1.89142	0.0585677	0.631091
319586	Celf5	CUGBP, Elav-like family member 5	ENSMUSG00000034818	11154.5	-0.143295	0.075768	-1.89123	0.0585939	0.631091
14227	Fkbp2	FK506 binding protein 2	ENSMUSG00000056629	1042.2	-0.161188	0.0852909	-1.88986	0.0587771	0.632532
269695	Rnft2	ring finger protein, transmembrane 2	ENSMUSG00000032850	5691.48	-0.135796	0.0718789	-1.88924	0.0588601	0.632788
16009	Igfbp3	insulin-like growth factor binding protein 3	ENSMUSG00000020427	847.124	0.165535	0.087651	1.88857	0.058949	0.632788
12916	Crem	cAMP responsive element modulator	ENSMUSG00000063889	386.827	0.191891	0.101603	1.88863	0.0589414	0.632788
68197	Ndufc2	NADH dehydrogenase (ubiquinone) 1, subcomplex unknown, 2	ENSMUSG00000030647	1962.13	0.151537	0.0803094	1.88692	0.0591711	0.634641
22272	Uqcrq	ubiquinol-cytochrome c reductase, complex III subunit VII	ENSMUSG00000044894	2683.61	-0.14055	0.0745252	-1.88594	0.0593029	0.635523
21841	Tia1	cytotoxic granule-associated RNA binding protein 1	ENSMUSG00000071337	884.657	0.155363	0.0824215	1.88498	0.059433	0.635854
67608	Narf	nuclear prelamin A recognition factor	ENSMUSG00000000056	2951.06	-0.136707	0.0725235	-1.88501	0.0594287	0.635854
319899	Dock6	dedicator of cytokinesis 6	ENSMUSG00000032198	200.716	0.200934	0.106621	1.88457	0.0594884	0.635915
244579	Tox3	TOX high mobility group box family member 3	ENSMUSG00000043668	125.483	-0.19997	0.106189	-1.88315	0.0596804	0.637047
216724	Rufy1	RUN and FYVE domain containing 1	ENSMUSG00000020375	894.509	-0.156022	0.0828559	-1.88305	0.0596936	0.637047
12017	Bag1	BCL2-associated athanogene 1	ENSMUSG00000028416	2079.38	-0.150388	0.0799121	-1.88191	0.0598479	0.637632
216439	Agap2	ArfGAP with GTPase domain, ankyrin repeat and PH domain 2	ENSMUSG00000025422	57101.6	-0.122444	0.0650527	-1.88223	0.0598043	0.637632
54367	Zfp326	zinc finger protein 326	ENSMUSG00000029290	757.725	0.169	0.0898273	1.88139	0.0599187	0.637855
319807	Nwd2	NACHT and WD repeat domain containing 2	ENSMUSG00000090061	2057.24	-0.161645	0.0860356	-1.87881	0.0602704	0.641067
100039123	Gm14295	predicted gene 14295	ENSMUSG00000078877	292.945	-0.190137	0.101265	-1.87763	0.060432	0.641901
110351	Rap1gap	Rap1 GTPase-activating protein	ENSMUSG00000041351	7617.41	-0.130602	0.0695885	-1.87677	0.0605492	0.641901
245880	Wasf3	WAS protein family, member 3	ENSMUSG00000029636	2893.33	-0.146902	0.0782511	-1.87731	0.060475	0.641901
16572	Kif5a	kinesin family member 5A	ENSMUSG00000074657	23273.9	-0.151446	0.0806803	-1.87711	0.0605034	0.641901
72931	Swi5	SWI5 recombination repair homolog (yeast)	ENSMUSG00000044627	2860.41	-0.132923	0.0708497	-1.87613	0.0606376	0.642308
NA	NA	NA	ENSMUSG00000111348	204.217	-0.19998	0.106617	-1.87569	0.0606984	0.64242
269629	Lhfpl3	lipoma HMGIC fusion partner-like 3	ENSMUSG00000106379	59.646	-0.189487	0.101117	-1.87395	0.0609376	0.643322
217265	Abca5	ATP-binding cassette, sub-family A (ABC1), member 5	ENSMUSG00000018800	904.319	0.160127	0.0854349	1.87426	0.0608949	0.643322
217698	Acot5	acyl-CoA thioesterase 5	ENSMUSG00000042540	191.352	-0.198306	0.105842	-1.87361	0.0609843	0.643322
106205	Zc3h7a	zinc finger CCCH type containing 7 A	ENSMUSG00000037965	598.121	0.171288	0.0913708	1.87465	0.060841	0.643322
12494	Cd38	CD38 antigen	ENSMUSG00000029084	42.9406	0.178759	0.0954409	1.87298	0.0610714	0.643437
240518	Peli3	pellino 3	ENSMUSG00000024901	675.522	-0.164713	0.0879501	-1.8728	0.0610957	0.643437
269610	Chd5	chromodomain helicase DNA binding protein 5	ENSMUSG00000005045	8748.61	-0.139972	0.0748111	-1.87101	0.0613434	0.645516
97423	R74862	expressed sequence R74862	ENSMUSG00000059277	128.689	0.201532	0.10776	1.87019	0.0614581	0.646192
19231	Ptma	prothymosin alpha	ENSMUSG00000026238	3071.77	0.149433	0.0799597	1.86886	0.0616428	0.647603
50791	Magi2	membrane associated guanylate kinase, WW and PDZ domain containing 2	ENSMUSG00000040003	3483.42	-0.155103	0.0830473	-1.86765	0.0618112	0.647779
19645	Rb1	RB transcriptional corepressor 1	ENSMUSG00000022105	724.461	-0.161445	0.0864366	-1.86778	0.0617928	0.647779
54409	Ramp2	receptor (calcitonin) activity modifying protein 2	ENSMUSG00000001240	350.898	0.184518	0.0987676	1.86821	0.0617331	0.647779
13494	Drg1	developmentally regulated GTP binding protein 1	ENSMUSG00000020457	2387.68	-0.136337	0.0730589	-1.86613	0.0620236	0.648415
NA	NA	NA	ENSMUSG00000053263	43.0739	0.17575	0.0941641	1.86642	0.0619821	0.648415
104156	Etv5	ets variant 5	ENSMUSG00000013089	3607.65	-0.14738	0.0789654	-1.86638	0.061988	0.648415
226777	C130074G19Rik	RIKEN cDNA C130074G19 gene	ENSMUSG00000039349	47.5735	-0.161279	0.0864607	-1.86535	0.0621327	0.649026
16775	Lama4	laminin, alpha 4	ENSMUSG00000019846	37.4915	-0.172046	0.0922592	-1.86481	0.0622074	0.649277
170936	Zfp369	zinc finger protein 369	ENSMUSG00000021514	785.778	-0.161563	0.0867547	-1.8623	0.0625611	0.652319
74158	Josd1	Josephin domain containing 1	ENSMUSG00000022426	2568.56	-0.13333	0.0716049	-1.86202	0.0626006	0.652319
100043771	Gm10651	predicted pseudogene 10651	ENSMUSG00000022426	2568.56	-0.13333	0.0716049	-1.86202	0.0626006	0.652319
241639	Fermt1	fermitin family member 1	ENSMUSG00000027356	59.5338	-0.18737	0.100688	-1.86088	0.0627606	0.653454
269181	Mgat4a	mannoside acetylglucosaminyltransferase 4, isoenzyme A	ENSMUSG00000026110	1119.91	0.153795	0.0828038	1.85734	0.0632621	0.653895
69367	Glrx2	glutaredoxin 2 (thioltransferase)	ENSMUSG00000018196	1269.86	-0.154351	0.0830458	-1.85863	0.0630797	0.653895
227624	Rabl6	RAB, member RAS oncogene family-like 6	ENSMUSG00000015087	4378.22	-0.135331	0.0728272	-1.85824	0.0631343	0.653895
108155	Ogt	O-linked N-acetylglucosamine (GlcNAc) transferase (UDP-N-acetylglucosamine:polypeptide-N-acetylglucosaminyl transferase)	ENSMUSG00000034160	4904.38	0.123588	0.0665289	1.85765	0.0632184	0.653895
18166	Npy1r	neuropeptide Y receptor Y1	ENSMUSG00000036437	689.045	-0.170899	0.0918765	-1.86009	0.0628725	0.653895
18040	Nefm	neurofilament, medium polypeptide	ENSMUSG00000022054	13260.6	-0.199823	0.107474	-1.85927	0.0629884	0.653895
70661	Sik3	SIK family kinase 3	ENSMUSG00000034135	4954.54	-0.12581	0.0677128	-1.858	0.0631697	0.653895
77591	Ddx10	DEAD (Asp-Glu-Ala-Asp) box polypeptide 10	ENSMUSG00000053289	628.202	0.16423	0.0883866	1.85808	0.0631573	0.653895
16706	Ksr1	kinase suppressor of ras 1	ENSMUSG00000018334	7025.67	-0.129922	0.0698971	-1.85876	0.0630608	0.653895
230751	Oscp1	organic solute carrier partner 1	ENSMUSG00000042616	1157.8	-0.151033	0.0813538	-1.85649	0.0633837	0.654098
69574	Cmbl	carboxymethylenebutenolidase-like (Pseudomonas)	ENSMUSG00000022235	301.08	0.188076	0.101297	1.85667	0.0633576	0.654098
76954	St5	suppression of tumorigenicity 5	ENSMUSG00000031024	368.214	0.184018	0.0991846	1.85531	0.0635524	0.654905
19946	Rpl30	ribosomal protein L30	ENSMUSG00000058600	820.313	0.153801	0.0829015	1.85522	0.0635642	0.654905
433003	Gm5481	predicted gene 5481	ENSMUSG00000058600	820.313	0.153801	0.0829015	1.85522	0.0635642	0.654905
619883	Gm6109	predicted gene 6109	ENSMUSG00000058600	820.313	0.153801	0.0829015	1.85522	0.0635642	0.654905
625281	Gm6570	predicted gene 6570	ENSMUSG00000058600	820.313	0.153801	0.0829015	1.85522	0.0635642	0.654905
664969	Gm7429	predicted pseudogene 7429	ENSMUSG00000058600	820.313	0.153801	0.0829015	1.85522	0.0635642	0.654905
17532	Mras	muscle and microspikes RAS	ENSMUSG00000032470	4767.42	-0.149877	0.0808098	-1.85468	0.0636415	0.655175
108927	Lhfp	lipoma HMGIC fusion partner	ENSMUSG00000048332	169.483	-0.199001	0.107392	-1.85304	0.0638761	0.656536
320265	Fam19a1	family with sequence similarity 19, member A1	ENSMUSG00000059187	2337.33	-0.140107	0.0756034	-1.85318	0.0638563	0.656536
98496	Pid1	phosphotyrosine interaction domain containing 1	ENSMUSG00000045658	1108.87	-0.149535	0.0807991	-1.8507	0.0642134	0.658218
18027	Nfia	nuclear factor I/A	ENSMUSG00000028565	994.628	0.157583	0.0851461	1.85073	0.0642081	0.658218
66441	Magohb	mago homolog B, exon junction complex core component	ENSMUSG00000030188	104.007	0.198804	0.107439	1.85039	0.064257	0.658218
70551	Tmtc4	transmembrane and tetratricopeptide repeat containing 4	ENSMUSG00000041594	263.628	0.188552	0.101913	1.85012	0.0642966	0.658218
245038	Dclk3	doublecortin-like kinase 3	ENSMUSG00000032500	555.378	-0.168423	0.0909705	-1.8514	0.0641119	0.658218
69780	Smap2	small ArfGAP 2	ENSMUSG00000032870	5451.86	-0.12224	0.0660843	-1.84975	0.0643491	0.65823
223666	Arhgap39	Rho GTPase activating protein 39	ENSMUSG00000033697	6137.99	-0.143523	0.0776243	-1.84894	0.0644666	0.658906
66756	Cfap97	cilia and flagella associated protein 97	ENSMUSG00000031631	1005.91	-0.150665	0.0815243	-1.8481	0.0645879	0.659095
71805	Nup93	nucleoporin 93	ENSMUSG00000032939	820.662	-0.158538	0.085775	-1.84831	0.064558	0.659095
226610	Fam78b	family with sequence similarity 78, member B	ENSMUSG00000060568	962.715	-0.152663	0.08266	-1.84688	0.0647646	0.660373
231238	Sel1l3	sel-1 suppressor of lin-12-like 3 (C. elegans)	ENSMUSG00000029189	2511.02	0.131988	0.0714975	1.84605	0.0648845	0.660544
72084	Pigx	phosphatidylinositol glycan anchor biosynthesis, class X	ENSMUSG00000023791	221.225	0.196069	0.106206	1.84612	0.0648749	0.660544
195646	Hs3st2	heparan sulfate (glucosamine) 3-O-sulfotransferase 2	ENSMUSG00000046321	750.484	-0.168968	0.0916021	-1.84459	0.0650975	0.661137
22433	Xbp1	X-box binding protein 1	ENSMUSG00000020484	1662.51	0.152386	0.0825894	1.84511	0.0650219	0.661137
207740	Ubald1	UBA-like domain containing 1	ENSMUSG00000039568	5097.3	-0.125265	0.0679033	-1.84475	0.0650742	0.661137
241289	Ppp1r26	protein phosphatase 1, regulatory subunit 26	ENSMUSG00000035829	626.92	0.161617	0.0876532	1.84382	0.0652091	0.661223
241638	Lzts3	leucine zipper, putative tumor suppressor family member 3	ENSMUSG00000037703	5938.71	0.127493	0.0691404	1.84398	0.0651862	0.661223
20617	Snca	synuclein, alpha	ENSMUSG00000025889	25205.7	0.135245	0.0734117	1.84228	0.0654341	0.662979
54598	Calcrl	calcitonin receptor-like	ENSMUSG00000059588	71.4663	0.192607	0.104573	1.84184	0.0654985	0.663107
13599	Ecel1	endothelin converting enzyme-like 1	ENSMUSG00000026247	56.9512	0.178011	0.0967213	1.84045	0.0657015	0.664638
100040608	Fancf	Fanconi anemia, complementation group F	ENSMUSG00000092118	50.5877	-0.180731	0.0982278	-1.83992	0.06578	0.664907
20239	Atxn2	ataxin 2	ENSMUSG00000042605	3985.45	-0.155028	0.0842887	-1.83925	0.0658782	0.665375
170823	Glmn	glomulin, FKBP associated protein	ENSMUSG00000029276	252.955	0.194634	0.105892	1.83804	0.0660565	0.665808
75612	Gns	glucosamine (N-acetyl)-6-sulfatase	ENSMUSG00000034707	2320.7	-0.1409	0.0766635	-1.8379	0.066077	0.665808
434437	Amt	aminomethyltransferase	ENSMUSG00000032607	98.2992	0.191657	0.104265	1.83818	0.0660365	0.665808
15926	Idh1	isocitrate dehydrogenase 1 (NADP+), soluble	ENSMUSG00000025950	1265.37	0.144028	0.0784269	1.83646	0.0662893	0.666248
171171	Ntng2	netrin G2	ENSMUSG00000035513	1981.06	0.135775	0.0739394	1.8363	0.066314	0.666248
73729	Zfp383	zinc finger protein 383	ENSMUSG00000099689	168.796	0.195677	0.106583	1.83591	0.0663705	0.666248
52815	Ldhd	lactate dehydrogenase D	ENSMUSG00000031958	336.995	0.182528	0.0993812	1.83665	0.066262	0.666248
16155	Il10rb	interleukin 10 receptor, beta	ENSMUSG00000022969	72.9163	0.187192	0.101965	1.83585	0.0663805	0.666248
329872	Frem1	Fras1 related extracellular matrix protein 1	ENSMUSG00000059049	43.1764	0.17604	0.0959853	1.83403	0.0666499	0.667906
19713	Ret	ret proto-oncogene	ENSMUSG00000030110	145.394	0.197544	0.107698	1.83423	0.0666198	0.667906
27401	Skp2	S-phase kinase-associated protein 2 (p45)	ENSMUSG00000054115	48.7527	0.176767	0.0964215	1.83327	0.0667621	0.668508
12167	Bmpr1b	bone morphogenetic protein receptor, type 1B	ENSMUSG00000052430	72.753	0.188954	0.103151	1.83183	0.0669772	0.670137
65103	Arl6ip6	ADP-ribosylation factor-like 6 interacting protein 6	ENSMUSG00000026960	169.108	0.195354	0.106679	1.83123	0.0670669	0.670512
22282	Usf2	upstream transcription factor 2	ENSMUSG00000058239	1551.22	-0.143035	0.0781254	-1.83083	0.0671257	0.670576
108672	Zdhhc15	zinc finger, DHHC domain containing 15	ENSMUSG00000033906	331.038	0.181851	0.0993837	1.82979	0.0672813	0.671608
20163	Rsu1	Ras suppressor protein 1	ENSMUSG00000026727	620.002	-0.165934	0.0907625	-1.82822	0.0675158	0.67175
76132	Faxc	failed axon connections homolog	ENSMUSG00000028246	1061.52	-0.181287	0.0991803	-1.82786	0.0675711	0.67175
231279	Guf1	GUF1 homolog, GTPase	ENSMUSG00000029208	367.158	0.181511	0.0992544	1.82875	0.0674371	0.67175
78593	Nrip3	nuclear receptor interacting protein 3	ENSMUSG00000034825	9842.32	0.116192	0.0635763	1.8276	0.06761	0.67175
74467	Pus10	pseudouridylate synthase 10	ENSMUSG00000020280	107.173	0.195591	0.107009	1.82779	0.0675804	0.67175
328234	Rnf182	ring finger protein 182	ENSMUSG00000044164	1670.73	0.137403	0.0751207	1.8291	0.0673849	0.67175
94220	Cnnm4	cyclin M4	ENSMUSG00000037408	963.259	0.155741	0.0852382	1.82713	0.0676799	0.671923
433693	Akirin2	akirin 2	ENSMUSG00000028291	1540.03	-0.161738	0.0886079	-1.82532	0.0679526	0.672028
108014	Srsf9	serine/arginine-rich splicing factor 9	ENSMUSG00000029538	984.76	-0.150676	0.0825009	-1.82635	0.0677976	0.672028
20422	Sem1	SEM1, 26S proteasome complex subunit	ENSMUSG00000042541	681.935	-0.1742	0.0954174	-1.82567	0.0679006	0.672028
245269	Nim1k	NIM1 serine/threonine protein kinase	ENSMUSG00000095930	499.491	-0.170916	0.0935772	-1.82648	0.0677787	0.672028
20656	Sod2	superoxide dismutase 2, mitochondrial	ENSMUSG00000006818	5365.12	-0.116621	0.0638671	-1.826	0.067851	0.672028
30933	Tor2a	torsin family 2, member A	ENSMUSG00000009563	570.832	-0.165529	0.0907115	-1.82479	0.0680332	0.672307
67480	Cwc25	CWC25 spliceosome-associated protein	ENSMUSG00000018541	719.139	0.156766	0.0859419	1.8241	0.0681377	0.67282
56726	Sh3bgrl	SH3-binding domain glutamic acid-rich protein like	ENSMUSG00000031246	3891.08	0.144274	0.0791153	1.82359	0.0682136	0.673051
12227	Btg2	B cell translocation gene 2, anti-proliferative	ENSMUSG00000020423	662.566	0.187588	0.102913	1.82278	0.0683371	0.673751
71310	Tbc1d9	TBC1 domain family, member 9	ENSMUSG00000031709	3528.69	0.124384	0.0682591	1.82224	0.0684193	0.674043
66822	Fbxo25	F-box protein 25	ENSMUSG00000038365	2338.16	0.137333	0.0754215	1.82087	0.0686269	0.675569
116972	Fam57a	family with sequence similarity 57, member A	ENSMUSG00000069808	327.603	-0.180055	0.0989091	-1.82041	0.0686964	0.675734
22249	Unc13b	unc-13 homolog B (C. elegans)	ENSMUSG00000028456	886.284	-0.172898	0.0950043	-1.81989	0.0687754	0.675992
24017	Rnf13	ring finger protein 13	ENSMUSG00000036503	1055.82	-0.148027	0.0813747	-1.81908	0.0688985	0.676166
73516	1700086O06Rik	RIKEN cDNA 1700086O06 gene	ENSMUSG00000097080	75.8244	-0.189789	0.104312	-1.81943	0.068846	0.676166
233189	Ctu1	cytosolic thiouridylase subunit 1	ENSMUSG00000038888	441.137	0.176212	0.0968897	1.81869	0.0689593	0.676244
636808	Cntnap5a	contactin associated protein-like 5A	ENSMUSG00000070695	610.082	-0.174153	0.0958605	-1.81673	0.0692585	0.678659
110895	Slc9a4	solute carrier family 9 (sodium/hydrogen exchanger), member 4	ENSMUSG00000026065	593.469	0.167345	0.0921975	1.81507	0.0695136	0.679293
14567	Gdi1	guanosine diphosphate (GDP) dissociation inhibitor 1	ENSMUSG00000015291	25484	0.121128	0.06674	1.81493	0.0695352	0.679293
68969	Eif1b	eukaryotic translation initiation factor 1B	ENSMUSG00000006941	2719.02	-0.130666	0.0719754	-1.81543	0.0694582	0.679293
237758	Zfp454	zinc finger protein 454	ENSMUSG00000048728	93.8626	0.193204	0.106412	1.81562	0.0694292	0.679293
60367	Il1rapl2	interleukin 1 receptor accessory protein-like 2	ENSMUSG00000059203	57.6814	-0.182637	0.100828	-1.81137	0.0700831	0.681348
229474	Fhdc1	FH2 domain containing 1	ENSMUSG00000041842	49.6751	-0.177297	0.0980174	-1.80883	0.0704769	0.681348
230233	Ikbkap	inhibitor of kappa light polypeptide enhancer in B cells, kinase complex-associated protein	ENSMUSG00000028431	3040.19	0.121492	0.0670541	1.81184	0.0700102	0.681348
19699	Reln	reelin	ENSMUSG00000042453	424.781	-0.154815	0.0855713	-1.8092	0.0704204	0.681348
52118	Pvr	poliovirus receptor	ENSMUSG00000040511	175.623	0.192755	0.10646	1.81059	0.0702049	0.681348
244216	Zfp771	zinc finger protein 771	ENSMUSG00000054716	1237.99	0.150773	0.083326	1.80943	0.0703841	0.681348
13650	Rhbdf1	rhomboid 5 homolog 1	ENSMUSG00000020282	58.7735	0.181535	0.100321	1.80953	0.0703682	0.681348
11418	Asic2	acid-sensing (proton-gated) ion channel 2	ENSMUSG00000020704	3035.73	-0.131249	0.072416	-1.81243	0.0699194	0.681348
208440	Dip2c	disco interacting protein 2 homolog C	ENSMUSG00000048264	3640.65	-0.148476	0.0819602	-1.81156	0.0700536	0.681348
105348	Golm1	golgi membrane protein 1	ENSMUSG00000021556	2622.29	0.133643	0.0738355	1.81001	0.0702949	0.681348
224129	Adcy5	adenylate cyclase 5	ENSMUSG00000022840	3876.58	-0.193531	0.106951	-1.80954	0.0703674	0.681348
11964	Atp6v1a	ATPase, H+ transporting, lysosomal V1 subunit A	ENSMUSG00000052459	26994.7	0.110599	0.0610994	1.81014	0.0702738	0.681348
20807	Srf	serum response factor	ENSMUSG00000015605	1869.33	-0.139324	0.0770275	-1.80875	0.0704898	0.681348
107272	Psat1	phosphoserine aminotransferase 1	ENSMUSG00000024640	960.443	0.149759	0.0827396	1.81	0.0702952	0.681348
382089	Ripply2	ripply transcriptional repressor 2	ENSMUSG00000047897	80.6423	-0.191072	0.105682	-1.80799	0.0706084	0.68198
57438	2021-03-07	membrane-associated ring finger (C3HC4) 7	ENSMUSG00000026977	1076.29	0.152095	0.0842075	1.80619	0.0708889	0.683659
238799	Tnpo1	transportin 1	ENSMUSG00000009470	634.934	0.167543	0.0927478	1.80644	0.0708504	0.683659
13349	Ackr1	atypical chemokine receptor 1 (Duffy blood group)	ENSMUSG00000037872	2030.95	0.13447	0.0744639	1.80584	0.0709431	0.683668
66634	Mcm8	minichromosome maintenance 8 homologous recombination repair factor	ENSMUSG00000027353	149.933	0.194056	0.107537	1.80455	0.0711455	0.684588
242443	Grin3a	glutamate receptor ionotropic, NMDA3A	ENSMUSG00000039579	1477.35	-0.14582	0.080799	-1.80473	0.0711174	0.684588
244650	Phlpp2	PH domain and leucine rich repeat protein phosphatase 2	ENSMUSG00000031732	1291.04	-0.162496	0.0901855	-1.8018	0.0715769	0.687366
75475	Oplah	5-oxoprolinase (ATP-hydrolysing)	ENSMUSG00000022562	257.358	0.189962	0.10541	1.80213	0.0715251	0.687366
74197	Gtf2e1	general transcription factor II E, polypeptide 1 (alpha subunit)	ENSMUSG00000022828	453.732	0.171617	0.0952535	1.80168	0.071595	0.687366
11545	Parp1	poly (ADP-ribose) polymerase family, member 1	ENSMUSG00000026496	5602.57	-0.156704	0.087024	-1.8007	0.0717505	0.687388
54636	Wdr45	WD repeat domain 45	ENSMUSG00000039382	437.37	0.177715	0.0986588	1.80131	0.0716543	0.687388
107476	Acaca	acetyl-Coenzyme A carboxylase alpha	ENSMUSG00000020532	2289.57	-0.159008	0.0883058	-1.80065	0.0717582	0.687388
330863	Trim67	tripartite motif-containing 67	ENSMUSG00000036913	188.169	0.191116	0.106159	1.80028	0.0718157	0.687424
208628	Kntc1	kinetochore associated 1	ENSMUSG00000029414	48.9069	0.170425	0.0947654	1.79839	0.0721149	0.688813
66337	Fam229b	family with sequence similarity 229, member B	ENSMUSG00000051736	127.587	-0.193801	0.107754	-1.79855	0.07209	0.688813
14682	Gnaq	guanine nucleotide binding protein, alpha q polypeptide	ENSMUSG00000024639	10111.6	-0.125588	0.0698354	-1.79835	0.0721219	0.688813
270120	Fat3	FAT atypical cadherin 3	ENSMUSG00000074505	1494.43	-0.171774	0.0955572	-1.79761	0.0722394	0.689421
18682	Phkg1	phosphorylase kinase gamma 1	ENSMUSG00000025537	40.2473	0.163575	0.0910176	1.79718	0.0723065	0.689548
214290	Zcchc6	zinc finger, CCHC domain containing 6	ENSMUSG00000035248	1604.04	-0.134756	0.074998	-1.79679	0.0723689	0.68963
13990	Smarcad1	SWI/SNF-related, matrix-associated actin-dependent regulator of chromatin, subfamily a, containing DEAD/H box 1	ENSMUSG00000029920	673.601	0.155074	0.0863472	1.79594	0.0725044	0.690133
80981	Arl4d	ADP-ribosylation factor-like 4D	ENSMUSG00000034936	270.15	-0.187011	0.104139	-1.79578	0.0725293	0.690133
20744	Strbp	spermatid perinuclear RNA binding protein	ENSMUSG00000026915	3469.31	-0.129096	0.0720184	-1.79254	0.0730461	0.690748
77032	Tstd3	thiosulfate sulfurtransferase (rhodanese)-like domain containing 3	ENSMUSG00000028251	483.187	-0.167159	0.0933092	-1.79146	0.0732201	0.690748
71817	Tmem50a	transmembrane protein 50A	ENSMUSG00000028822	2491.93	-0.129453	0.0722236	-1.79239	0.0730698	0.690748
14190	Fgl2	fibrinogen-like protein 2	ENSMUSG00000039899	100.635	0.192497	0.107434	1.79177	0.0731691	0.690748
NA	NA	NA	ENSMUSG00000107134	55.4112	-0.17763	0.0990451	-1.79342	0.072905	0.690748
233879	Asphd1	aspartate beta-hydroxylase domain containing 1	ENSMUSG00000046378	764.082	0.15891	0.0886025	1.79352	0.0728899	0.690748
53325	Banp	BTG3 associated nuclear protein	ENSMUSG00000025316	984.578	0.148407	0.0828312	1.79168	0.0731849	0.690748
380684	Nefh	neurofilament, heavy polypeptide	ENSMUSG00000020396	2653.21	-0.154275	0.0861393	-1.79099	0.0732946	0.690748
11840	Arf1	ADP-ribosylation factor 1	ENSMUSG00000048076	16925.4	-0.119519	0.0666948	-1.79203	0.0731284	0.690748
18023	Nfe2l1	nuclear factor, erythroid derived 2,-like 1	ENSMUSG00000038615	9065.15	-0.113173	0.0630918	-1.79379	0.0728475	0.690748
106504	Stk38	serine/threonine kinase 38	ENSMUSG00000024006	257.616	0.187988	0.104862	1.79271	0.0730188	0.690748
108013	Celf4	CUGBP, Elav-like family member 4	ENSMUSG00000024268	20060.8	0.116033	0.0646471	1.79487	0.0726746	0.690748
NA	NA	NA	ENSMUSG00000054178	50.2645	-0.172692	0.0964126	-1.79117	0.0732657	0.690748
67283	Slc25a19	solute carrier family 25 (mitochondrial thiamine pyrophosphate carrier), member 19	ENSMUSG00000020744	1116.39	-0.144511	0.0807083	-1.79053	0.073368	0.690931
208618	Etl4	enhancer trap locus 4	ENSMUSG00000036617	2429	-0.143415	0.0802917	-1.78618	0.0740708	0.691527
17754	Map1a	microtubule-associated protein 1 A	ENSMUSG00000027254	27351.8	-0.15602	0.0873179	-1.7868	0.0739693	0.691527
NA	NA	NA	ENSMUSG00000086606	153.718	-0.192239	0.107636	-1.78602	0.074096	0.691527
74096	Hvcn1	hydrogen voltage-gated channel 1	ENSMUSG00000064267	67.7904	-0.186016	0.103992	-1.78876	0.0736531	0.691527
104263	Kdm3a	lysine (K)-specific demethylase 3A	ENSMUSG00000053470	668.139	0.154369	0.086472	1.78519	0.0742308	0.691527
68472	Tmem126b	transmembrane protein 126B	ENSMUSG00000030614	952.809	-0.146142	0.0816716	-1.78939	0.0735528	0.691527
20887	Sult1a1	sulfotransferase family 1A, phenol-preferring, member 1	ENSMUSG00000030711	105.144	0.191942	0.107497	1.78556	0.0741711	0.691527
76965	Slitrk1	SLIT and NTRK-like family, member 1	ENSMUSG00000075478	2574.08	-0.125962	0.0703884	-1.78953	0.0735295	0.691527
67776	Vwa5a	von Willebrand factor A domain containing 5A	ENSMUSG00000023186	102.852	0.190232	0.106468	1.78676	0.0739766	0.691527
26934	Racgap1	Rac GTPase-activating protein 1	ENSMUSG00000023015	117.721	0.191877	0.107291	1.78838	0.0737146	0.691527
12737	Cldn1	claudin 1	ENSMUSG00000022512	75.2818	-0.18814	0.105387	-1.78522	0.0742254	0.691527
239796	Mb21d2	Mab-21 domain containing 2	ENSMUSG00000051065	775.204	-0.151161	0.0846781	-1.78513	0.0742405	0.691527
93724	Pcdhga12	protocadherin gamma subfamily A, 12	ENSMUSG00000102428	499.811	-0.178402	0.0998697	-1.78635	0.0740433	0.691527
623279	Dok6	docking protein 6	ENSMUSG00000073514	169.549	-0.191831	0.107422	-1.78576	0.0741373	0.691527
18569	Pdcd4	programmed cell death 4	ENSMUSG00000024975	3338.93	0.147923	0.0828445	1.78556	0.0741713	0.691527
17309	Mgat3	mannoside acetylglucosaminyltransferase 3	ENSMUSG00000042428	5690.24	-0.121315	0.0680047	-1.78392	0.074437	0.692511
NA	NA	NA	ENSMUSG00000117284	275.331	0.181709	0.101865	1.78381	0.0744543	0.692511
547176	Zc3h12b	zinc finger CCCH-type containing 12B	ENSMUSG00000035045	816.906	-0.147968	0.0830454	-1.78178	0.0747859	0.693626
107449	Unc5b	unc-5 netrin receptor B	ENSMUSG00000020099	203.337	0.188867	0.105965	1.78235	0.0746928	0.693626
66083	Setd6	SET domain containing 6	ENSMUSG00000031671	177.182	-0.190959	0.107212	-1.78113	0.074891	0.693626
66148	Dnajc15	DnaJ heat shock protein family (Hsp40) member C15	ENSMUSG00000022013	952.702	-0.147022	0.0825153	-1.78175	0.0747898	0.693626
333433	Gpd1l	glycerol-3-phosphate dehydrogenase 1-like	ENSMUSG00000050627	5307.49	-0.116917	0.0656356	-1.78131	0.0748619	0.693626
218038	Amph	amphiphysin	ENSMUSG00000021314	12862.2	0.115018	0.0645777	1.78108	0.0748989	0.693626
94282	Sfxn5	sideroflexin 5	ENSMUSG00000033720	1254.45	-0.15704	0.0882446	-1.7796	0.075141	0.695366
58186	Rad18	RAD18 E3 ubiquitin protein ligase	ENSMUSG00000030254	186.271	0.188092	0.10576	1.77847	0.075326	0.696575
237711	Eml6	echinoderm microtubule associated protein like 6	ENSMUSG00000044072	1230.43	0.157431	0.0885551	1.77777	0.075441	0.697136
14236	Foxn2	forkhead box N2	ENSMUSG00000034998	471.511	0.16413	0.0923561	1.77714	0.0755447	0.697591
20402	Zfp106	zinc finger protein 106	ENSMUSG00000027288	4331.51	-0.139414	0.0785972	-1.77378	0.0760999	0.702145
171486	Cd99l2	CD99 antigen-like 2	ENSMUSG00000035776	2368.69	-0.135262	0.0762832	-1.77316	0.0762022	0.702145
231841	Brat1	BRCA1-associated ATM activator 1	ENSMUSG00000000148	686.771	0.154678	0.0872311	1.7732	0.0761958	0.702145
225655	Prelid3a	PRELI domain containing 3A	ENSMUSG00000024530	853.392	-0.147182	0.0830247	-1.77275	0.0762707	0.702271
68126	Fahd2a	fumarylacetoacetate hydrolase domain containing 2A	ENSMUSG00000027371	339.793	0.176043	0.0993501	1.77195	0.076403	0.702984
11790	Speg	SPEG complex locus	ENSMUSG00000026207	6269.39	-0.113193	0.0639153	-1.77099	0.076563	0.703447
320244	Ttll5	tubulin tyrosine ligase-like family, member 5	ENSMUSG00000012609	702.579	-0.167068	0.0943316	-1.77107	0.0765497	0.703447
NA	NA	NA	ENSMUSG00000082329	163.89	-0.0510685	0.0288521	-1.77001	0.0767252	0.704432
55983	Pdzrn3	PDZ domain containing RING finger 3	ENSMUSG00000035357	270.016	-0.183128	0.103486	-1.76958	0.0767966	0.704582
12283	Cab39	calcium binding protein 39	ENSMUSG00000036707	5151.94	-0.121002	0.0684085	-1.76881	0.0769248	0.70475
227446	2310035C23Rik	RIKEN cDNA 2310035C23 gene	ENSMUSG00000026319	1876.57	0.136592	0.077222	1.76882	0.0769241	0.70475
73242	Atat1	alpha tubulin acetyltransferase 1	ENSMUSG00000024426	1719.24	0.131568	0.0743975	1.76844	0.076987	0.704816
18548	Pcsk1	proprotein convertase subtilisin/kexin type 1	ENSMUSG00000021587	1257.15	0.148421	0.0839781	1.76738	0.0771644	0.705936
13170	Dbp	D site albumin promoter binding protein	ENSMUSG00000059824	1422.92	-0.141428	0.0800377	-1.76702	0.0772251	0.705987
71687	Tmem25	transmembrane protein 25	ENSMUSG00000002032	1003.4	-0.140666	0.0797277	-1.76433	0.0776757	0.7096
74178	Stk40	serine/threonine kinase 40	ENSMUSG00000042608	606.172	0.159912	0.0906677	1.76371	0.0777808	0.710055
17921	Myo7a	myosin VIIA	ENSMUSG00000030761	459.899	0.171609	0.0974077	1.76176	0.0781102	0.710415
17748	Mt1	metallothionein 1	ENSMUSG00000031765	819.304	0.1618	0.0918403	1.76175	0.0781115	0.710415
235567	Dnajc13	DnaJ heat shock protein family (Hsp40) member C13	ENSMUSG00000032560	1506.54	-0.140835	0.0799512	-1.76151	0.0781528	0.710415
224997	Dlgap1	DLG associated protein 1	ENSMUSG00000003279	20855.3	-0.127801	0.0725183	-1.76233	0.0780134	0.710415
170942	Erdr1	erythroid differentiation regulator 1	ENSMUSG00000096768	208.705	0.189637	0.107639	1.76179	0.0781046	0.710415
66060	Cystm1	cysteine-rich transmembrane module containing 1	ENSMUSG00000046727	809.838	0.155156	0.0880603	1.76193	0.0780819	0.710415
16536	Kcnq2	potassium voltage-gated channel, subfamily Q, member 2	ENSMUSG00000016346	15348.9	-0.134171	0.076218	-1.76036	0.0783462	0.711182
240514	Ccdc85b	coiled-coil domain containing 85B	ENSMUSG00000095098	3647.92	-0.135662	0.0770653	-1.76035	0.0783482	0.711182
210982	Bicral	BRD4 interacting chromatin remodeling complex associated protein like	ENSMUSG00000036568	1106.55	-0.146215	0.0830861	-1.7598	0.0784422	0.711531
72033	Tsc22d2	TSC22 domain family, member 2	ENSMUSG00000027806	1204.32	0.140518	0.079879	1.75913	0.0785553	0.712053
18124	Nr4a3	nuclear receptor subfamily 4, group A, member 3	ENSMUSG00000028341	7187.74	0.11625	0.0660993	1.75872	0.0786254	0.712185
71532	Fam217b	family with sequence similarity 217, member B	ENSMUSG00000070476	1697.17	-0.129465	0.0736979	-1.7567	0.0789695	0.71338
269643	Ppp2r2c	protein phosphatase 2, regulatory subunit B, gamma	ENSMUSG00000029120	19496.5	-0.12096	0.0689098	-1.75533	0.0792026	0.71338
381677	Vgf	VGF nerve growth factor inducible	ENSMUSG00000037428	16696	0.110889	0.0630929	1.75755	0.0788241	0.71338
77582	Mboat7	membrane bound O-acyltransferase domain containing 7	ENSMUSG00000035596	3474.16	-0.125655	0.0715461	-1.75629	0.0790394	0.71338
NA	NA	NA	ENSMUSG00000110631	29.4877	0.143245	0.0816054	1.75534	0.0792019	0.71338
72821	Scn2b	sodium channel, voltage-gated, type II, beta	ENSMUSG00000070304	9954.33	-0.107995	0.0615138	-1.75563	0.079152	0.71338
18458	Pabpc1	poly(A) binding protein, cytoplasmic 1	ENSMUSG00000022283	6286.79	0.115404	0.0657423	1.7554	0.0791917	0.71338
223739	5031439G07Rik	RIKEN cDNA 5031439G07 gene	ENSMUSG00000036046	3316.77	0.135485	0.0771539	1.75603	0.0790824	0.71338
14897	Trip12	thyroid hormone receptor interactor 12	ENSMUSG00000026219	2124.52	-0.134548	0.0766968	-1.75428	0.079382	0.714494
NA	NA	NA	ENSMUSG00000082896	66.7385	0.177555	0.101398	1.75108	0.079933	0.715348
242274	Lrrc7	leucine rich repeat containing 7	ENSMUSG00000028176	2476.58	-0.138027	0.0787638	-1.75242	0.079701	0.715348
333789	N4bp2	NEDD4 binding protein 2	ENSMUSG00000037795	98.8942	0.186874	0.106663	1.75201	0.0797728	0.715348
14701	Gng12	guanine nucleotide binding protein (G protein), gamma 12	ENSMUSG00000036402	958.51	-0.149401	0.0853247	-1.75097	0.0799516	0.715348
54446	Nfat5	nuclear factor of activated T cells 5	ENSMUSG00000003847	1236.45	-0.145633	0.0831038	-1.75243	0.0797006	0.715348
17758	Map4	microtubule-associated protein 4	ENSMUSG00000032479	23459.6	-0.128923	0.0736365	-1.75081	0.0799792	0.715348
23969	Pacsin1	protein kinase C and casein kinase substrate in neurons 1	ENSMUSG00000040276	16703.2	-0.120146	0.0685843	-1.7518	0.0798089	0.715348
224647	D17Wsu92e	DNA segment, Chr 17, Wayne State University 92, expressed	ENSMUSG00000056692	5361.72	-0.138333	0.0790091	-1.75085	0.0799711	0.715348
20405	Sh3gl1	SH3-domain GRB2-like 1	ENSMUSG00000003200	1553.12	0.130878	0.0746865	1.75236	0.0797113	0.715348
217480	Dgkb	diacylglycerol kinase, beta	ENSMUSG00000036095	7530.48	0.133543	0.0763205	1.74977	0.0801579	0.716446
71599	Senp8	SUMO/sentrin specific peptidase 8	ENSMUSG00000051705	177.601	0.186124	0.106418	1.749	0.0802918	0.717143
18802	Plcd4	phospholipase C, delta 4	ENSMUSG00000026173	37.1307	0.161433	0.0923276	1.74848	0.0803813	0.717442
330171	Kctd10	potassium channel tetramerisation domain containing 10	ENSMUSG00000001098	1566.52	-0.133949	0.0767638	-1.74495	0.0809939	0.721904
218232	Ptpdc1	protein tyrosine phosphatase domain containing 1	ENSMUSG00000038042	826.735	0.144363	0.0827201	1.7452	0.0809493	0.721904
12626	Cetn3	centrin 3	ENSMUSG00000021537	823.91	0.161316	0.0924885	1.74417	0.0811294	0.72261
239650	Ccdc184	coiled-coil domain containing 184	ENSMUSG00000029875	833.93	0.161602	0.0926724	1.7438	0.0811946	0.722689
56194	Prpf40a	pre-mRNA processing factor 40A	ENSMUSG00000061136	980.123	0.147497	0.084621	1.74303	0.0813288	0.722879
320910	Itgb8	integrin beta 8	ENSMUSG00000025321	203.472	0.184091	0.10561	1.74311	0.0813138	0.722879
13002	Dnajc5	DnaJ heat shock protein family (Hsp40) member C5	ENSMUSG00000000826	13112.6	-0.114624	0.0658343	-1.7411	0.0816655	0.72404
83398	Ndst3	N-deacetylase/N-sulfotransferase (heparan glucosaminyl) 3	ENSMUSG00000027977	648.286	-0.156319	0.0898167	-1.74042	0.0817848	0.72404
66259	Camk2n1	calcium/calmodulin-dependent protein kinase II inhibitor 1	ENSMUSG00000046447	14743.1	-0.150084	0.0862673	-1.73975	0.0819024	0.72404
14548	Mrps33	mitochondrial ribosomal protein S33	ENSMUSG00000029918	735.295	-0.158602	0.0911869	-1.73931	0.0819803	0.72404
319783	A730056A06Rik	RIKEN cDNA A730056A06 gene	ENSMUSG00000097756	39.3389	-0.164198	0.094435	-1.73874	0.0820809	0.72404
57437	Golga7	golgi autoantigen, golgin subfamily a, 7	ENSMUSG00000015341	1141.99	-0.142744	0.0820761	-1.73917	0.0820052	0.72404
436090	Gpr62	G protein-coupled receptor 62	ENSMUSG00000091735	136.503	-0.186269	0.107119	-1.7389	0.0820529	0.72404
11764	Ap1b1	adaptor protein complex AP-1, beta 1 subunit	ENSMUSG00000009090	5866.54	0.111652	0.0642072	1.73894	0.0820462	0.72404
67846	Tmem39a	transmembrane protein 39a	ENSMUSG00000002845	73.3686	0.182641	0.104901	1.74109	0.0816682	0.72404
68655	Fndc1	fibronectin type III domain containing 1	ENSMUSG00000071984	223.201	0.187258	0.107596	1.74037	0.0817937	0.72404
12393	Runx2	runt related transcription factor 2	ENSMUSG00000039153	254.112	-0.182301	0.104766	-1.74009	0.0818436	0.72404
69080	Gmppa	GDP-mannose pyrophosphorylase A	ENSMUSG00000033021	989.019	0.147102	0.0847333	1.73606	0.0825524	0.724072
12269	C4bp	complement component 4 binding protein	ENSMUSG00000026405	49.4081	0.170817	0.0984604	1.73488	0.0827624	0.724072
319909	Ism1	isthmin 1, angiogenesis inhibitor	ENSMUSG00000074766	260.649	-0.182805	0.105355	-1.73513	0.0827173	0.724072
433904	Ociad2	OCIA domain containing 2	ENSMUSG00000029153	3342.91	-0.132511	0.0762986	-1.73674	0.0824338	0.724072
12315	Calm3	calmodulin 3	ENSMUSG00000019370	92068.9	-0.108203	0.0622635	-1.73782	0.082242	0.724072
20866	Stim1	stromal interaction molecule 1	ENSMUSG00000030987	2145.7	-0.13026	0.0750692	-1.7352	0.0827046	0.724072
140742	Sesn1	sestrin 1	ENSMUSG00000038332	1345.14	-0.131264	0.0755982	-1.73633	0.0825047	0.724072
12867	Cox7c	cytochrome c oxidase subunit VIIc	ENSMUSG00000017778	1725.26	-0.140318	0.0808718	-1.73506	0.0827294	0.724072
NA	NA	NA	ENSMUSG00000032846	979.379	0.145799	0.0839204	1.73735	0.0823262	0.724072
208715	Hmgcs1	3-hydroxy-3-methylglutaryl-Coenzyme A synthase 1	ENSMUSG00000093930	12116.5	-0.110078	0.0633685	-1.7371	0.0823689	0.724072
14904	Gtpbp1	GTP binding protein 1	ENSMUSG00000042535	1832.48	-0.128797	0.0741037	-1.73807	0.0821984	0.724072
104174	Gldc	glycine decarboxylase	ENSMUSG00000024827	37.5641	0.160573	0.0925429	1.73512	0.0827194	0.724072
240756	Klhl12	kelch-like 12	ENSMUSG00000026455	1551.93	0.133869	0.0772537	1.73285	0.0831231	0.724134
75426	Igfbpl1	insulin-like growth factor binding protein-like 1	ENSMUSG00000035551	87.1453	0.184409	0.106463	1.73213	0.0832496	0.724134
55942	Sertad1	SERTA domain containing 1	ENSMUSG00000008384	231.722	0.18689	0.107797	1.73373	0.0829668	0.724134
239027	Arhgap22	Rho GTPase activating protein 22	ENSMUSG00000063506	106.732	-0.186148	0.107371	-1.73368	0.0829743	0.724134
54214	Golga4	golgi autoantigen, golgin subfamily a, 4	ENSMUSG00000038708	1281.34	-0.137929	0.079608	-1.7326	0.0831661	0.724134
17755	Map1b	microtubule-associated protein 1B	ENSMUSG00000052727	27717	-0.141768	0.08181	-1.73289	0.0831147	0.724134
328133	Slc39a9	solute carrier family 39 (zinc transporter), member 9	ENSMUSG00000048833	1449.9	-0.132383	0.0763459	-1.73399	0.0829197	0.724134
27660	1700088E04Rik	RIKEN cDNA 1700088E04 gene	ENSMUSG00000033029	112.477	-0.186278	0.107552	-1.73198	0.083278	0.724134
93873	Pcdhb2	protocadherin beta 2	ENSMUSG00000051599	49.1967	-0.168858	0.0974135	-1.73342	0.0830213	0.724134
71860	Cfap52	cilia and flagella associated protein 52	ENSMUSG00000020904	30.9467	-0.148994	0.0860703	-1.73108	0.083438	0.725033
76089	Rapgef2	Rap guanine nucleotide exchange factor (GEF) 2	ENSMUSG00000062232	7239.88	0.129677	0.0749822	1.72944	0.0837312	0.72666
272322	Arntl2	aryl hydrocarbon receptor nuclear translocator-like 2	ENSMUSG00000040187	72.6992	0.181086	0.104711	1.72939	0.0837385	0.72666
109241	Mbd5	methyl-CpG binding domain protein 5	ENSMUSG00000036792	2074.58	-0.14727	0.0851884	-1.72876	0.0838525	0.726665
75710	Rbm12	RNA binding motif protein 12	ENSMUSG00000089824	466.909	0.162621	0.0940566	1.72897	0.0838148	0.726665
100040294	Gm2694	predicted gene 2694	ENSMUSG00000097248	39.3083	-0.155682	0.0900815	-1.72824	0.0839455	0.726979
74117	Actr3	ARP3 actin-related protein 3	ENSMUSG00000026341	9019.65	-0.1082	0.0627684	-1.7238	0.0847437	0.727171
228359	Arhgap1	Rho GTPase activating protein 1	ENSMUSG00000027247	2667.85	0.124054	0.0718653	1.7262	0.0843113	0.727171
12361	Cask	calcium/calmodulin-dependent serine protein kinase (MAGUK family)	ENSMUSG00000031012	2223.18	-0.134173	0.0776656	-1.72757	0.0840645	0.727171
67437	Ssr3	signal sequence receptor, gamma	ENSMUSG00000027828	2068.25	0.125074	0.0725155	1.72479	0.0845647	0.727171
666938	Bend4	BEN domain containing 4	ENSMUSG00000092060	332.117	0.177646	0.102915	1.72615	0.084321	0.727171
77630	Prdm8	PR domain containing 8	ENSMUSG00000035456	5289.28	-0.127233	0.0738274	-1.72339	0.0848186	0.727171
629378	Dact3	dishevelled-binding antagonist of beta-catenin 3	ENSMUSG00000078794	4303.73	-0.139237	0.0807687	-1.7239	0.0847259	0.727171
NA	NA	NA	ENSMUSG00000097509	29.2687	0.148061	0.0859058	1.72352	0.084794	0.727171
21929	Tnfaip3	tumor necrosis factor, alpha-induced protein 3	ENSMUSG00000019850	330.136	0.171865	0.0997193	1.72349	0.0847999	0.727171
211329	Ncoa7	nuclear receptor coactivator 7	ENSMUSG00000039697	2817.75	-0.14012	0.0812541	-1.72447	0.0846232	0.727171
14388	Gab1	growth factor receptor bound protein 2-associated protein 1	ENSMUSG00000031714	87.4548	0.183038	0.106027	1.72634	0.0842867	0.727171
56012	Pgam2	phosphoglycerate mutase 2	ENSMUSG00000020475	394.923	-0.179066	0.103768	-1.72565	0.0844104	0.727171
75607	Wnk2	WNK lysine deficient protein kinase 2	ENSMUSG00000037989	4066.04	-0.147878	0.0857911	-1.7237	0.0847625	0.727171
268595	D430019H16Rik	RIKEN cDNA D430019H16 gene	ENSMUSG00000094910	8087.4	-0.109537	0.0635493	-1.72366	0.0847695	0.727171
66168	Grina	glutamate receptor, ionotropic, N-methyl D-aspartate-associated protein 1 (glutamate binding)	ENSMUSG00000022564	21149.1	-0.107818	0.0625398	-1.72399	0.0847092	0.727171
19165	Psen2	presenilin 2	ENSMUSG00000010609	678.366	0.151042	0.0877389	1.72149	0.0851621	0.727883
12447	Ccne1	cyclin E1	ENSMUSG00000002068	383.655	-0.166424	0.0966409	-1.72209	0.0850534	0.727883
17022	Lum	lumican	ENSMUSG00000036446	99.0499	0.180149	0.104609	1.72211	0.0850495	0.727883
12362	Casp1	caspase 1	ENSMUSG00000025888	40.5091	-0.162268	0.0942795	-1.72114	0.0852257	0.727883
14432	Gap43	growth associated protein 43	ENSMUSG00000047261	11482	0.120302	0.0699002	1.72105	0.0852425	0.727883
52004	Cdk2ap2	CDK2-associated protein 2	ENSMUSG00000024856	421.784	0.16433	0.0954793	1.7211	0.0852321	0.727883
69064	Fuom	fucose mutarotase	ENSMUSG00000025466	282.691	-0.179418	0.104281	-1.72052	0.0853372	0.728186
107513	Ssr1	signal sequence receptor, alpha	ENSMUSG00000021427	3233.99	-0.116548	0.0677518	-1.72022	0.0853916	0.728186
226304	Npbwr1	neuropeptides B/W receptor 1	ENSMUSG00000033774	109.066	0.182855	0.106462	1.71756	0.0858772	0.72845
70652	Tmem144	transmembrane protein 144	ENSMUSG00000027956	310.262	0.174026	0.101277	1.71832	0.0857381	0.72845
78977	Popdc3	popeye domain containing 3	ENSMUSG00000019848	273.497	0.175058	0.101863	1.71856	0.0856954	0.72845
219140	Spata13	spermatogenesis associated 13	ENSMUSG00000021990	294.445	0.181836	0.105865	1.71761	0.0858669	0.72845
240068	Zfp563	zinc finger protein 563	ENSMUSG00000067424	146.434	0.185064	0.107682	1.71861	0.0856846	0.72845
65960	Twsg1	twisted gastrulation BMP signaling modulator 1	ENSMUSG00000024098	631.574	0.153859	0.0895157	1.7188	0.085651	0.72845
225631	Onecut2	one cut domain, family member 2	ENSMUSG00000045991	59.1573	-0.17304	0.100739	-1.71771	0.0858496	0.72845
71653	Shtn1	shootin 1	ENSMUSG00000041362	1084.2	0.143975	0.0837685	1.71872	0.0856648	0.72845
56443	Arpc1a	actin related protein 2/3 complex, subunit 1A	ENSMUSG00000029621	7144.64	-0.107557	0.0626493	-1.71681	0.0860131	0.72912
14586	Gfra2	glial cell line derived neurotrophic factor family receptor alpha 2	ENSMUSG00000022103	969.304	-0.167261	0.0974766	-1.71591	0.0861781	0.730037
69171	Cnppd1	cyclin Pas1/PHO80 domain containing 1	ENSMUSG00000033159	631.775	0.149963	0.0875482	1.71293	0.0867263	0.731551
227746	Rabepk	Rab9 effector protein with kelch motifs	ENSMUSG00000070953	602.381	-0.153719	0.0897494	-1.71276	0.0867565	0.731551
77578	Bcl9	B cell CLL/lymphoma 9	ENSMUSG00000038256	1973.21	-0.139751	0.0815327	-1.71405	0.0865192	0.731551
230393	Focad	focadhesin	ENSMUSG00000038368	1091.45	0.140523	0.081964	1.71445	0.0864459	0.731551
24055	Sh3bp2	SH3-domain binding protein 2	ENSMUSG00000054520	127.131	0.184551	0.10775	1.71277	0.0867552	0.731551
320534	Tmem104	transmembrane protein 104	ENSMUSG00000045980	647.991	-0.153535	0.0896397	-1.7128	0.0867496	0.731551
67264	Ndufb8	NADH dehydrogenase (ubiquinone) 1 beta subcomplex 8	ENSMUSG00000025204	2515.82	-0.139407	0.0813888	-1.71286	0.0867387	0.731551
78688	Nol3	nucleolar protein 3 (apoptosis repressor with CARD domain)	ENSMUSG00000014776	465.321	-0.169782	0.0991736	-1.71197	0.0869023	0.731818
105663	Thtpa	thiamine triphosphatase	ENSMUSG00000045691	295.635	-0.174992	0.102201	-1.71223	0.0868547	0.731818
20745	Spock1	sparc/osteonectin, cwcv and kazal-like domains proteoglycan 1	ENSMUSG00000056222	12585.6	0.114907	0.0671585	1.71099	0.0870834	0.732381
239408	Tmem74	transmembrane protein 74	ENSMUSG00000054409	966.637	-0.139704	0.0816371	-1.71128	0.0870301	0.732381
20646	Snrpn	small nuclear ribonucleoprotein N	ENSMUSG00000102252	22165.5	-0.123649	0.0722817	-1.71066	0.0871448	0.732416
100043272	Inafm2	InaF motif containing 2	ENSMUSG00000074918	1430.67	-0.145078	0.0849894	-1.70701	0.0878203	0.732573
192216	Tmem47	transmembrane protein 47	ENSMUSG00000025666	795.564	0.143499	0.084118	1.70593	0.0880213	0.732573
19273	Ptpru	protein tyrosine phosphatase, receptor type, U	ENSMUSG00000028909	2427.09	-0.122613	0.0717252	-1.70948	0.0873621	0.732573
381668	Fbrsl1	fibrosin-like 1	ENSMUSG00000043323	1719.88	-0.137067	0.0804148	-1.70449	0.0882887	0.732573
117146	Ube3b	ubiquitin protein ligase E3B	ENSMUSG00000029577	3283.49	-0.116899	0.0683825	-1.70949	0.0873596	0.732573
330369	Fbxo41	F-box protein 41	ENSMUSG00000047013	6832.15	-0.131456	0.0770547	-1.70601	0.0880063	0.732573
56353	Rybp	RING1 and YY1 binding protein	ENSMUSG00000072872	821.828	0.150161	0.0881244	1.70397	0.0883876	0.732573
108705	Pttg1ip	pituitary tumor-transforming 1 interacting protein	ENSMUSG00000009291	457.542	0.159328	0.093461	1.70476	0.0882396	0.732573
327812	Gm15663	predicted gene 15663	ENSMUSG00000085282	83.99	-0.181437	0.106253	-1.70759	0.0877119	0.732573
432508	Cpsf6	cleavage and polyadenylation specific factor 6	ENSMUSG00000055531	2119.6	0.121983	0.0714422	1.70744	0.0877409	0.732573
12552	Cdh11	cadherin 11	ENSMUSG00000031673	3954.14	0.115694	0.0678969	1.70397	0.0883865	0.732573
12325	Camk2g	calcium/calmodulin-dependent protein kinase II gamma	ENSMUSG00000021820	4383.98	-0.139297	0.081733	-1.70429	0.0883261	0.732573
69890	Zfp219	zinc finger protein 219	ENSMUSG00000049295	403.906	0.166944	0.0979411	1.70453	0.0882813	0.732573
18039	Nefl	neurofilament, light polypeptide	ENSMUSG00000022055	35178	-0.112982	0.0662638	-1.70503	0.0881879	0.732573
14027	Evpl	envoplakin	ENSMUSG00000034282	74.0644	0.177339	0.104085	1.70379	0.0884208	0.732573
15228	Foxg1	forkhead box G1	ENSMUSG00000020950	3774.52	-0.135291	0.0792561	-1.70701	0.087821	0.732573
13132	Dab2	disabled 2, mitogen-responsive phosphoprotein	ENSMUSG00000022150	32.2813	0.152979	0.0897465	1.70457	0.088275	0.732573
18100	Mrpl40	mitochondrial ribosomal protein L40	ENSMUSG00000022706	619.433	-0.153291	0.0899261	-1.70463	0.0882632	0.732573
56297	Arl6	ADP-ribosylation factor-like 6	ENSMUSG00000022722	524.715	0.159486	0.0933232	1.70897	0.0874573	0.732573
11957	Atp5j	ATP synthase, H+ transporting, mitochondrial F0 complex, subunit F	ENSMUSG00000022890	2367.67	-0.129552	0.0759698	-1.70531	0.0881362	0.732573
12575	Cdkn1a	cyclin-dependent kinase inhibitor 1A (P21)	ENSMUSG00000023067	755.539	-0.149658	0.0877551	-1.70541	0.0881187	0.732573
18797	Plcb3	phospholipase C, beta 3	ENSMUSG00000024960	49.9605	0.166871	0.0976403	1.70903	0.0874445	0.732573
20348	Sema3c	sema domain, immunoglobulin domain (Ig), short basic domain, secreted, (semaphorin) 3C	ENSMUSG00000028780	636.573	0.164309	0.0964945	1.70278	0.0886088	0.732709
320528	Vps13c	vacuolar protein sorting 13C	ENSMUSG00000035284	1773.88	-0.129002	0.0757368	-1.70329	0.0885135	0.732709
170930	Sumo2	small ubiquitin-like modifier 2	ENSMUSG00000020738	860.163	-0.141079	0.0828492	-1.70284	0.0885978	0.732709
241494	Zfp385b	zinc finger protein 385B	ENSMUSG00000027016	1735.97	-0.128427	0.0754451	-1.70226	0.0887065	0.733044
71306	Mfap3l	microfibrillar-associated protein 3-like	ENSMUSG00000031647	928.733	-0.146052	0.0858696	-1.70085	0.0889707	0.733619
105439	Slain1	SLAIN motif family, member 1	ENSMUSG00000055717	1109.48	-0.134251	0.0789404	-1.70067	0.089005	0.733619
70357	Kcnip1	Kv channel-interacting protein 1	ENSMUSG00000053519	272.612	0.179386	0.10546	1.70098	0.0889472	0.733619
16515	Kcnj12	potassium inwardly-rectifying channel, subfamily J, member 12	ENSMUSG00000042529	199.616	-0.180605	0.106167	-1.70114	0.0889172	0.733619
330286	D630045J12Rik	RIKEN cDNA D630045J12 gene	ENSMUSG00000063455	2162.05	-0.153445	0.0902446	-1.70032	0.089071	0.733691
70997	Spef1	sperm flagellar 1	ENSMUSG00000027329	339.71	-0.168623	0.0992679	-1.69866	0.0893827	0.733861
54637	Praf2	PRA1 domain family 2	ENSMUSG00000031149	1314.92	-0.134428	0.0791069	-1.69932	0.0892587	0.733861
15903	Id3	inhibitor of DNA binding 3	ENSMUSG00000007872	43.9481	0.163803	0.0964639	1.69808	0.0894925	0.733861
103236	Csnk1g2	casein kinase 1, gamma 2	ENSMUSG00000003345	3959.94	-0.124166	0.0731047	-1.69847	0.08942	0.733861
14457	Gas7	growth arrest specific 7	ENSMUSG00000033066	18433.3	-0.139588	0.0821632	-1.69891	0.0893361	0.733861
13612	Edil3	EGF-like repeats and discoidin I-like domains 3	ENSMUSG00000034488	2345.92	0.123257	0.0725826	1.69816	0.0894772	0.733861
213988	Tnrc6b	trinucleotide repeat containing 6b	ENSMUSG00000047888	2757.94	-0.135494	0.0797759	-1.69844	0.0894256	0.733861
108760	Galnt16	polypeptide N-acetylgalactosaminyltransferase 16	ENSMUSG00000021130	8890.46	0.108597	0.0639795	1.69737	0.0896259	0.734042
19252	Dusp1	dual specificity phosphatase 1	ENSMUSG00000024190	825.885	0.159564	0.0940071	1.69736	0.089629	0.734042
23939	Mapk7	mitogen-activated protein kinase 7	ENSMUSG00000001034	711.348	0.148321	0.0874263	1.69652	0.0897867	0.734395
72349	Dusp3	dual specificity phosphatase 3 (vaccinia virus phosphatase VH1-related)	ENSMUSG00000003518	6544.11	-0.112607	0.0663651	-1.69678	0.0897386	0.734395
16764	Aff3	AF4/FMR2 family, member 3	ENSMUSG00000037138	2200.94	-0.147857	0.0873278	-1.69312	0.0904321	0.734983
76969	Chst1	carbohydrate (keratan sulfate Gal-6) sulfotransferase 1	ENSMUSG00000027221	10251	-0.106324	0.062788	-1.69338	0.0903836	0.734983
18619	Penk	preproenkephalin	ENSMUSG00000045573	469.112	-0.177467	0.104689	-1.69519	0.0900394	0.734983
108655	Foxp1	forkhead box P1	ENSMUSG00000030067	2767.18	-0.127246	0.0751495	-1.69324	0.090409	0.734983
73032	Ttc9b	tetratricopeptide repeat domain 9B	ENSMUSG00000007944	3296.16	-0.144953	0.0855284	-1.69479	0.0901146	0.734983
13206	Ddx4	DEAD (Asp-Glu-Ala-Asp) box polypeptide 4	ENSMUSG00000021758	72.6891	-0.176836	0.104395	-1.69391	0.0902816	0.734983
208846	Daam1	dishevelled associated activator of morphogenesis 1	ENSMUSG00000034574	2154.58	0.132214	0.0780727	1.69347	0.0903655	0.734983
15512	Hspa2	heat shock protein 2	ENSMUSG00000059970	3965.42	0.120792	0.0713298	1.69342	0.0903749	0.734983
NA	NA	NA	ENSMUSG00000097451	4491.52	-0.1464	0.0863856	-1.69473	0.0901268	0.734983
12234	Btrc	beta-transducin repeat containing protein	ENSMUSG00000025217	2789.5	-0.116179	0.0686116	-1.69328	0.0904012	0.734983
NA	NA	NA	ENSMUSG00000109946	816.268	-0.153186	0.090846	-1.68622	0.0917534	0.735896
70239	Gtf3c5	general transcription factor IIIC, polypeptide 5	ENSMUSG00000026816	523.791	0.152885	0.0905879	1.6877	0.0914685	0.735896
58521	Eid1	EP300 interacting inhibitor of differentiation 1	ENSMUSG00000091337	9857.57	0.125568	0.0744485	1.68664	0.0916727	0.735896
228714	Kat14	lysine acetyltransferase 14	ENSMUSG00000027425	904.695	-0.138793	0.0820781	-1.69099	0.0908383	0.735896
57815	Spata5	spermatogenesis associated 5	ENSMUSG00000027722	398.26	0.162754	0.0962321	1.69126	0.0907862	0.735896
20351	Sema4a	sema domain, immunoglobulin domain (Ig), transmembrane domain (TM) and short cytoplasmic domain, (semaphorin) 4A	ENSMUSG00000028064	972.951	0.13961	0.0827509	1.68712	0.0915807	0.735896
13445	Cdk2ap1	CDK2 (cyclin-dependent kinase 2)-associated protein 1	ENSMUSG00000029394	180.027	-0.181806	0.107797	-1.68655	0.0916891	0.735896
NA	NA	NA	ENSMUSG00000086804	44.3557	-0.15581	0.0923376	-1.68739	0.0915275	0.735896
66881	Pcyox1	prenylcysteine oxidase 1	ENSMUSG00000029998	4068.16	-0.112931	0.0670075	-1.68534	0.0919224	0.735896
12348	Car11	carbonic anhydrase 11	ENSMUSG00000003273	2470.33	-0.12638	0.0748273	-1.68896	0.0912271	0.735896
56847	Aldh1a3	aldehyde dehydrogenase family 1, subfamily A3	ENSMUSG00000015134	43.7757	0.158463	0.0937483	1.69031	0.0909692	0.735896
57342	Parva	parvin, alpha	ENSMUSG00000030770	2423.23	0.135336	0.0800366	1.69093	0.0908498	0.735896
76484	Kndc1	kinase non-catalytic C-lobe domain (KIND) containing 1	ENSMUSG00000066129	2989.69	0.128512	0.0759474	1.69212	0.090624	0.735896
237553	Trhde	TRH-degrading enzyme	ENSMUSG00000050663	1865.08	0.135813	0.0805784	1.68548	0.091896	0.735896
56495	Asna1	arsA arsenite transporter, ATP-binding, homolog 1 (bacterial)	ENSMUSG00000052456	2183.11	-0.134559	0.0797893	-1.68643	0.0917133	0.735896
244668	Sipa1l2	signal-induced proliferation-associated 1 like 2	ENSMUSG00000001995	1599.31	-0.158327	0.0938217	-1.68753	0.0915017	0.735896
69459	Ubl7	ubiquitin-like 7 (bone marrow stromal cell-derived)	ENSMUSG00000055720	2828.76	-0.119558	0.0707391	-1.69013	0.0910037	0.735896
16661	Krt10	keratin 10	ENSMUSG00000019761	165.261	-0.180924	0.107143	-1.68862	0.0912929	0.735896
11858	Rnd2	Rho family GTPase 2	ENSMUSG00000001313	531.746	0.156833	0.0929937	1.68649	0.0917018	0.735896
108903	Tbcd	tubulin-specific chaperone d	ENSMUSG00000039230	1350.99	0.130192	0.0770801	1.68904	0.0912112	0.735896
11984	Atp6v0c	ATPase, H+ transporting, lysosomal V0 subunit C	ENSMUSG00000024121	6618.66	-0.113169	0.0671275	-1.68587	0.0918201	0.735896
381085	Tbc1d22b	TBC1 domain family, member 22B	ENSMUSG00000042203	2173.45	-0.125446	0.074344	-1.68737	0.0915321	0.735896
14296	Frat1	frequently rearranged in advanced T cell lymphomas	ENSMUSG00000067199	714.063	-0.149015	0.0882253	-1.68903	0.0912146	0.735896
226139	Cox15	cytochrome c oxidase assembly protein 15	ENSMUSG00000040018	895.246	0.144943	0.0858356	1.68861	0.0912948	0.735896
227937	Pkp4	plakophilin 4	ENSMUSG00000026991	8834.59	-0.114159	0.0677663	-1.6846	0.092066	0.735944
386750	Slitrk3	SLIT and NTRK-like family, member 3	ENSMUSG00000048304	2688.7	-0.131754	0.07831	-1.68247	0.0924784	0.735944
229714	Gpr61	G protein-coupled receptor 61	ENSMUSG00000046793	467.067	-0.158252	0.0940333	-1.68294	0.0923873	0.735944
58227	Fam184b	family with sequence similarity 184, member B	ENSMUSG00000015879	297.869	0.172557	0.102559	1.68251	0.09247	0.735944
50540	Igbp1b	immunoglobulin (CD79A) binding protein 1b	ENSMUSG00000046717	40.6436	-0.155614	0.0924167	-1.68383	0.0922149	0.735944
11652	Akt2	thymoma viral proto-oncogene 2	ENSMUSG00000004056	1586.64	-0.141109	0.0837487	-1.68491	0.0920057	0.735944
69683	Emc10	ER membrane protein complex subunit 10	ENSMUSG00000008140	7183.9	-0.114019	0.0677196	-1.68369	0.0922421	0.735944
68667	Trpm4	transient receptor potential cation channel, subfamily M, member 4	ENSMUSG00000038260	243.649	0.177642	0.105593	1.68233	0.0925047	0.735944
209776	Gpr139	G protein-coupled receptor 139	ENSMUSG00000066197	59.308	0.172033	0.102279	1.682	0.0925685	0.735944
15374	Jpt1	Jupiter microtubule associated homolog 1	ENSMUSG00000020737	3121.88	0.123473	0.0734322	1.68145	0.0926749	0.735944
72958	Zfp493	zinc finger protein 493	ENSMUSG00000090659	89.0581	0.178173	0.105948	1.6817	0.0926272	0.735944
57259	Tob2	transducer of ERBB2, 2	ENSMUSG00000048546	567.109	0.152613	0.090736	1.68195	0.0925784	0.735944
16551	Kif11	kinesin family member 11	ENSMUSG00000012443	31.0415	0.149512	0.088877	1.68224	0.0925233	0.735944
77569	Limch1	LIM and calponin homology domains 1	ENSMUSG00000037736	796.423	0.164207	0.0977104	1.68055	0.0928504	0.736882
108079	Prkaa2	protein kinase, AMP-activated, alpha 2 catalytic subunit	ENSMUSG00000028518	1046.5	-0.141643	0.0843032	-1.68017	0.0929251	0.737018
241520	Fam171b	family with sequence similarity 171, member B	ENSMUSG00000048388	9605.04	-0.112091	0.0667553	-1.67913	0.0931276	0.737027
231659	Gcn1l1	GCN1 general control of amino-acid synthesis 1-like 1 (yeast)	ENSMUSG00000041638	1674.9	0.135095	0.0804381	1.6795	0.0930554	0.737027
77521	Mtus2	microtubule associated tumor suppressor candidate 2	ENSMUSG00000029651	1700.02	-0.133499	0.0794749	-1.67976	0.0930043	0.737027
76429	Lhpp	phospholysine phosphohistidine inorganic pyrophosphate phosphatase	ENSMUSG00000030946	1177.75	0.142743	0.0850177	1.67898	0.0931563	0.737027
213811	BC002059	cDNA sequence BC002059	ENSMUSG00000060149	144.495	0.180873	0.107758	1.6785	0.093249	0.737306
217119	Xylt2	xylosyltransferase II	ENSMUSG00000020868	866.759	0.145816	0.0868907	1.67816	0.0933163	0.737383
595136	Ndufs5	NADH dehydrogenase (ubiquinone) Fe-S protein 5	ENSMUSG00000028648	833.931	-0.141638	0.084437	-1.67744	0.0934573	0.737587
18810	Plec	plectin	ENSMUSG00000022565	2425.09	-0.142701	0.0850621	-1.67761	0.0934228	0.737587
329502	Pla2g4e	phospholipase A2, group IVE	ENSMUSG00000050211	244.824	-0.178107	0.106297	-1.67556	0.0938242	0.739354
19159	Cyth3	cytohesin 3	ENSMUSG00000018001	1213.14	-0.130866	0.0781096	-1.67541	0.0938542	0.739354
67419	3632451O06Rik	RIKEN cDNA 3632451O06 gene	ENSMUSG00000036242	1301.71	-0.141086	0.0841931	-1.67575	0.0937874	0.739354
234736	Rfwd3	ring finger and WD repeat domain 3	ENSMUSG00000033596	684.905	0.148377	0.088581	1.67504	0.0939262	0.739467
26399	Map2k6	mitogen-activated protein kinase kinase 6	ENSMUSG00000020623	254.444	-0.173621	0.103671	-1.67472	0.0939885	0.739503
69399	1700025G04Rik	RIKEN cDNA 1700025G04 gene	ENSMUSG00000032666	1936.59	-0.128361	0.0766655	-1.6743	0.094072	0.739706
240752	Pik3c2b	phosphatidylinositol-4-phosphate 3-kinase catalytic subunit type 2 beta	ENSMUSG00000026447	444.134	-0.169789	0.101463	-1.67341	0.0942471	0.740628
54519	Apbb1ip	amyloid beta (A4) precursor protein-binding, family B, member 1 interacting protein	ENSMUSG00000026786	36.1352	-0.153327	0.0917386	-1.67134	0.0946543	0.740898
100043757	Zfp831	zinc finger protein 831	ENSMUSG00000050600	971.453	-0.156311	0.0934958	-1.67185	0.0945533	0.740898
51938	Ccdc39	coiled-coil domain containing 39	ENSMUSG00000027676	330.655	0.168242	0.100677	1.67111	0.0947005	0.740898
56706	Ccnl1	cyclin L1	ENSMUSG00000027829	339.022	0.16403	0.0981695	1.67089	0.0947438	0.740898
70797	Ankib1	ankyrin repeat and IBR domain containing 1	ENSMUSG00000040351	1525.93	0.12885	0.077104	1.67112	0.0946975	0.740898
320825	Samd5	sterile alpha motif domain containing 5	ENSMUSG00000060487	731.381	-0.149442	0.0894168	-1.67129	0.0946637	0.740898
11842	Arf3	ADP-ribosylation factor 3	ENSMUSG00000051853	54312.2	-0.0998064	0.0597093	-1.67154	0.0946152	0.740898
NA	NA	NA	ENSMUSG00000024571	2482.82	-0.144273	0.0863335	-1.67111	0.0946996	0.740898
114886	Cygb	cytoglobin	ENSMUSG00000020810	897.227	0.14389	0.0861366	1.67048	0.094824	0.741073
NA	NA	NA	ENSMUSG00000109130	64.1841	-0.17216	0.103104	-1.66976	0.094967	0.741738
12825	Col3a1	collagen, type III, alpha 1	ENSMUSG00000026043	46.6495	0.15151	0.0907617	1.66931	0.0950551	0.741974
231148	Ablim2	actin-binding LIM protein 2	ENSMUSG00000029095	3273.67	-0.121522	0.0728144	-1.66893	0.095131	0.742114
69352	Necab1	N-terminal EF-hand calcium binding protein 1	ENSMUSG00000040536	1744.36	-0.131374	0.0787901	-1.66739	0.0954362	0.743594
NA	NA	NA	ENSMUSG00000097566	52.6839	-0.166487	0.0998488	-1.66739	0.0954367	0.743594
68002	Sdhaf4	succinate dehydrogenase complex assembly factor 4	ENSMUSG00000026154	417.126	0.161097	0.0969067	1.66239	0.0964349	0.744313
11480	Acvr2a	activin receptor IIA	ENSMUSG00000052155	1503.89	0.140786	0.0847069	1.66204	0.0965044	0.744313
53310	Dlg3	discs large MAGUK scaffold protein 3	ENSMUSG00000000881	14467.1	-0.120707	0.0725483	-1.66381	0.0961501	0.744313
194590	Reps2	RALBP1 associated Eps domain containing protein 2	ENSMUSG00000040855	7745.98	-0.112828	0.067835	-1.66328	0.0962573	0.744313
18072	Nhlh2	nescient helix loop helix 2	ENSMUSG00000048540	51.802	0.164631	0.0991085	1.66111	0.0966905	0.744313
107684	Coro2a	coronin, actin binding protein 2A	ENSMUSG00000028337	1785.41	0.130371	0.0784614	1.66159	0.096595	0.744313
269585	Zscan20	zinc finger and SCAN domains 20	ENSMUSG00000061894	115.592	0.179071	0.107701	1.66268	0.0963774	0.744313
16826	Ldb2	LIM domain binding 2	ENSMUSG00000039706	2116.1	-0.121735	0.0730789	-1.66581	0.0957514	0.744313
17992	Ndufa4	NADH dehydrogenase (ubiquinone) 1 alpha subcomplex, 4	ENSMUSG00000029632	4892.26	-0.11746	0.0706746	-1.66199	0.0965156	0.744313
14609	Gja1	gap junction protein, alpha 1	ENSMUSG00000050953	157.926	0.177297	0.10662	1.66289	0.0963349	0.744313
12140	Fabp7	fatty acid binding protein 7, brain	ENSMUSG00000019874	78.7351	0.174039	0.104679	1.66259	0.0963937	0.744313
16969	Zbtb7a	zinc finger and BTB domain containing 7a	ENSMUSG00000035011	4413.73	-0.14505	0.0870998	-1.66533	0.095847	0.744313
330695	Ctxn1	cortexin 1	ENSMUSG00000048644	8891.92	-0.126988	0.0762883	-1.66458	0.0959974	0.744313
50724	Sap30l	SAP30-like	ENSMUSG00000020519	564.077	-0.17248	0.103507	-1.66637	0.0956404	0.744313
12009	Cep131	centrosomal protein 131	ENSMUSG00000039781	1230.64	0.134357	0.0808814	1.66115	0.0966824	0.744313
97884	B3galnt2	UDP-GalNAc:betaGlcNAc beta 1,3-galactosaminyltransferase, polypeptide 2	ENSMUSG00000039242	176.318	-0.178222	0.10712	-1.66375	0.096162	0.744313
11564	Adsl	adenylosuccinate lyase	ENSMUSG00000022407	396.927	0.160306	0.0964742	1.66165	0.0965829	0.744313
NA	NA	NA	ENSMUSG00000116564	441.666	0.160031	0.0962673	1.66236	0.09644	0.744313
69259	Kctd5	potassium channel tetramerisation domain containing 5	ENSMUSG00000016946	686.518	0.143092	0.0861042	1.66184	0.0965441	0.744313
74580	Pyroxd2	pyridine nucleotide-disulphide oxidoreductase domain 2	ENSMUSG00000060224	36.5207	-0.13837	0.0831463	-1.66417	0.0960777	0.744313
18128	Notch1	notch 1	ENSMUSG00000026923	92.4885	0.17739	0.106861	1.66001	0.0969134	0.744767
26385	Grk6	G protein-coupled receptor kinase 6	ENSMUSG00000074886	2319.92	-0.120173	0.0723727	-1.66048	0.0968179	0.744767
68565	Mrps18a	mitochondrial ribosomal protein S18A	ENSMUSG00000023967	881.453	-0.135954	0.0819023	-1.65995	0.0969237	0.744767
69807	Trim32	tripartite motif-containing 32	ENSMUSG00000051675	9926.1	0.102403	0.0617262	1.65899	0.0971181	0.745432
269639	Zfp512	zinc finger protein 512	ENSMUSG00000062761	1085.47	0.136282	0.0821495	1.65895	0.0971265	0.745432
12386	Ctnna2	catenin (cadherin associated protein), alpha 2	ENSMUSG00000063063	4481.97	-0.114738	0.0692028	-1.658	0.0973172	0.746002
72124	Seh1l	SEH1-like (S. cerevisiae	ENSMUSG00000079614	1128.04	-0.136812	0.0825163	-1.658	0.0973169	0.746002
77767	Ermn	ermin, ERM-like protein	ENSMUSG00000026830	29.2425	-0.144583	0.0872844	-1.65646	0.0976294	0.746089
72865	Rtl8c	retrotransposon Gag like 8C	ENSMUSG00000051851	1476.67	-0.135201	0.0815649	-1.65759	0.0973994	0.746089
75991	Slain2	SLAIN motif family, member 2	ENSMUSG00000036087	614.176	0.150064	0.0905931	1.65646	0.0976284	0.746089
387314	Tmtc1	transmembrane and tetratricopeptide repeat containing 1	ENSMUSG00000030306	1239.36	-0.137535	0.083056	-1.65593	0.097736	0.746089
64384	Sirt3	sirtuin 3	ENSMUSG00000025486	1008.94	-0.135419	0.0817724	-1.65605	0.0977116	0.746089
235300	Tmem136	transmembrane protein 136	ENSMUSG00000048503	430.657	-0.160102	0.0966348	-1.65678	0.0975649	0.746089
215445	Rab11fip3	RAB11 family interacting protein 3 (class II)	ENSMUSG00000037098	4761.55	-0.120141	0.0725175	-1.65672	0.0975768	0.746089
76273	Ndfip2	Nedd4 family interacting protein 2	ENSMUSG00000053253	3190.03	-0.114836	0.069362	-1.65561	0.0978014	0.746143
73884	Zdbf2	zinc finger, DBF-type containing 2	ENSMUSG00000027520	986.94	0.14716	0.0892953	1.64802	0.0993491	0.746955
18159	Nppc	natriuretic peptide type C	ENSMUSG00000026241	97.305	-0.174639	0.106029	-1.64709	0.0995396	0.746955
75605	Kdm5b	lysine (K)-specific demethylase 5B	ENSMUSG00000042207	2163.41	0.131713	0.0798897	1.64868	0.0992134	0.746955
226830	Smyd2	SET and MYND domain containing 2	ENSMUSG00000026603	1654.77	-0.138317	0.0838569	-1.64945	0.0990564	0.746955
12831	Col5a1	collagen, type V, alpha 1	ENSMUSG00000026837	98.7994	0.17285	0.104716	1.65065	0.0988103	0.746955
57249	Gabrq	gamma-aminobutyric acid (GABA) A receptor, subunit theta	ENSMUSG00000031344	53.0719	0.160746	0.0972615	1.65272	0.0983874	0.746955
70237	Bhlhb9	basic helix-loop-helix domain containing, class B9	ENSMUSG00000072964	1606.5	0.127883	0.0772867	1.65466	0.0979939	0.746955
229644	Trim45	tripartite motif-containing 45	ENSMUSG00000033233	270.38	-0.168061	0.101739	-1.65188	0.098559	0.746955
22784	Slc30a3	solute carrier family 30 (zinc transporter), member 3	ENSMUSG00000029151	2607.14	-0.114997	0.0698142	-1.64719	0.0995198	0.746955
69940	Exoc1	exocyst complex component 1	ENSMUSG00000036435	895.937	0.139764	0.0847834	1.64849	0.0992525	0.746955
11423	Ache	acetylcholinesterase	ENSMUSG00000023328	3719.4	0.115383	0.0699746	1.64893	0.0991622	0.746955
17295	Met	met proto-oncogene	ENSMUSG00000009376	398.579	-0.160734	0.0972409	-1.65294	0.0983425	0.746955
57896	Krcc1	lysine-rich coiled-coil 1	ENSMUSG00000053012	61.9173	0.168523	0.102259	1.648	0.099352	0.746955
NA	NA	NA	ENSMUSG00000085782	67.4081	-0.1702	0.103174	-1.64964	0.0990163	0.746955
19277	Ptpro	protein tyrosine phosphatase, receptor type, O	ENSMUSG00000030223	2061.27	0.141398	0.085464	1.65447	0.0980311	0.746955
77124	9130221H12Rik	RIKEN cDNA 9130221H12 gene	ENSMUSG00000090330	236.603	0.170639	0.103181	1.65379	0.0981701	0.746955
72580	Zufsp	zinc finger with UFM1-specific peptidase domain	ENSMUSG00000039531	106.088	0.177557	0.1076	1.65016	0.0989097	0.746955
21807	Tsc22d1	TSC22 domain family, member 1	ENSMUSG00000022010	12062.5	-0.102062	0.0617818	-1.65197	0.0985405	0.746955
19684	Rdx	radixin	ENSMUSG00000032050	1317.79	0.138169	0.0838662	1.64749	0.0994577	0.746955
235534	Pxylp1	2-phosphoxylose phosphatase 1	ENSMUSG00000043587	381.515	0.160348	0.0970078	1.65294	0.0983432	0.746955
13543	Dvl2	dishevelled segment polarity protein 2	ENSMUSG00000020888	293.995	0.166332	0.100981	1.64716	0.0995245	0.746955
19155	Npepps	aminopeptidase puromycin sensitive	ENSMUSG00000001441	5556.63	-0.114735	0.0694833	-1.65126	0.0986862	0.746955
238692	Zfp874a	zinc finger protein 874a	ENSMUSG00000069206	327.18	0.164036	0.099341	1.65124	0.0986894	0.746955
238123	Cog5	component of oligomeric golgi complex 5	ENSMUSG00000035933	2074.96	-0.121667	0.0738515	-1.64746	0.0994637	0.746955
NA	NA	NA	ENSMUSG00000023795	86.8721	-0.175591	0.106537	-1.64817	0.0993181	0.746955
12815	Col11a2	collagen, type XI, alpha 2	ENSMUSG00000024330	98.8492	0.174442	0.105622	1.65158	0.0986203	0.746955
15937	Ier3	immediate early response 3	ENSMUSG00000003541	56.8304	0.165624	0.100505	1.64792	0.0993695	0.746955
NA	NA	NA	ENSMUSG00000117172	37.1371	0.151039	0.09137	1.65305	0.0983207	0.746955
27643	Ubl4a	ubiquitin-like 4A	ENSMUSG00000015290	2060.54	-0.121194	0.0736133	-1.64636	0.0996894	0.747165
100169864	Gm44504	predicted readthrough transcript (NMD candidate), 44504	ENSMUSG00000015290	2060.54	-0.121194	0.0736133	-1.64636	0.0996894	0.747165
269473	Lrig2	leucine-rich repeats and immunoglobulin-like domains 2	ENSMUSG00000032913	840.638	0.139194	0.0845331	1.64662	0.0996369	0.747165
70791	Hars2	histidyl-tRNA synthetase 2	ENSMUSG00000019143	458.393	0.155882	0.0946977	1.6461	0.0997425	0.747165
229521	Syt11	synaptotagmin XI	ENSMUSG00000068923	30684.2	0.0982229	0.0597482	1.64395	0.100187	0.748783
27403	Abca7	ATP-binding cassette, sub-family A (ABC1), member 7	ENSMUSG00000035722	419.686	-0.163024	0.0991882	-1.64358	0.100262	0.748783
320183	Msrb3	methionine sulfoxide reductase B3	ENSMUSG00000051236	33.0524	-0.146579	0.0891319	-1.64452	0.100069	0.748783
16426	Itih3	inter-alpha trypsin inhibitor, heavy chain 3	ENSMUSG00000006522	30.5887	0.138839	0.0844783	1.64348	0.100283	0.748783
74388	Dpp8	dipeptidylpeptidase 8	ENSMUSG00000032393	4083.16	-0.135975	0.0827692	-1.64282	0.10042	0.748783
14555	Gpd1	glycerol-3-phosphate dehydrogenase 1 (soluble)	ENSMUSG00000023019	3713.66	-0.115802	0.0704811	-1.64302	0.100379	0.748783
30957	Mapk8ip3	mitogen-activated protein kinase 8 interacting protein 3	ENSMUSG00000024163	21753.9	-0.112117	0.0681992	-1.64396	0.100183	0.748783
320879	B230217O12Rik	RIKEN cDNA B230217O12 gene	ENSMUSG00000097785	225.538	-0.176601	0.1075	-1.64279	0.100426	0.748783
229363	Gmps	guanine monophosphate synthetase	ENSMUSG00000027823	2624.55	0.11626	0.0708923	1.63996	0.101014	0.748815
NA	NA	NA	ENSMUSG00000106917	94.1365	-0.175064	0.106741	-1.64008	0.100988	0.748815
100710	Pds5b	PDS5 cohesin associated factor B	ENSMUSG00000034021	2136.15	0.121473	0.0739654	1.64229	0.10053	0.748815
114875	Plcz1	phospholipase C, zeta 1	ENSMUSG00000030230	49.4362	-0.159996	0.0975198	-1.64065	0.10087	0.748815
78670	Plekhj1	pleckstrin homology domain containing, family J member 1	ENSMUSG00000035278	657.42	-0.150029	0.0914238	-1.64103	0.100792	0.748815
78787	Usp54	ubiquitin specific peptidase 54	ENSMUSG00000034235	337.703	-0.161495	0.0984058	-1.64112	0.100773	0.748815
665268	1600029O15Rik	ribosomal protein L17 pseudogene	ENSMUSG00000057818	61.24	-0.168655	0.102834	-1.64007	0.100991	0.748815
18197	Nsg2	neuron specific gene family member 2	ENSMUSG00000020297	28813	-0.101818	0.0620728	-1.6403	0.100943	0.748815
11688	Alox8	arachidonate 8-lipoxygenase	ENSMUSG00000020891	71.8544	0.171906	0.104703	1.64185	0.100621	0.748815
56551	Txn2	thioredoxin 2	ENSMUSG00000005354	2249.97	-0.134739	0.0821438	-1.64028	0.100947	0.748815
12505	Cd44	CD44 antigen	ENSMUSG00000005087	95.1397	0.174862	0.106772	1.63771	0.101483	0.750987
76338	Rab2b	RAB2B, member RAS oncogene family	ENSMUSG00000022159	995.518	0.132839	0.081111	1.63774	0.101476	0.750987
279766	Rhbdd3	rhomboid domain containing 3	ENSMUSG00000034175	324.893	0.163163	0.0996282	1.63772	0.10148	0.750987
75646	Rai14	retinoic acid induced 14	ENSMUSG00000022246	183.577	0.175266	0.107064	1.63702	0.101626	0.751607
20192	Ryr3	ryanodine receptor 3	ENSMUSG00000057378	1045.04	-0.144744	0.0885252	-1.63506	0.102037	0.753347
16918	Mycl	v-myc avian myelocytomatosis viral oncogene lung carcinoma derived	ENSMUSG00000028654	1391.6	0.141087	0.0862839	1.63515	0.102019	0.753347
64242	Ngb	neuroglobin	ENSMUSG00000021032	49.6442	0.161586	0.09882	1.63515	0.102017	0.753347
67484	Eepd1	endonuclease/exonuclease/phosphatase family domain containing 1	ENSMUSG00000036611	461.641	-0.161338	0.0987085	-1.63449	0.102157	0.753797
94227	Pi15	peptidase inhibitor 15	ENSMUSG00000067780	78.0524	0.17093	0.105068	1.62685	0.10377	0.75575
98710	Rabif	RAB interacting factor	ENSMUSG00000042229	1062.11	-0.1374	0.0844865	-1.6263	0.103887	0.75575
320404	Itpkb	inositol 1,4,5-trisphosphate 3-kinase B	ENSMUSG00000038855	353.591	-0.167881	0.103002	-1.62988	0.103127	0.75575
NA	NA	NA	ENSMUSG00000085385	68.5176	0.166896	0.102615	1.62643	0.103859	0.75575
229841	Cenpe	centromere protein E	ENSMUSG00000045328	83.5851	0.172952	0.106113	1.62989	0.103125	0.75575
72397	Rbm12b1	RNA binding motif protein 12 B1	ENSMUSG00000046667	123.394	0.173546	0.106548	1.62881	0.103352	0.75575
666048	Trabd2b	TraB domain containing 2B	ENSMUSG00000070867	65.5132	-0.154849	0.095073	-1.62873	0.103369	0.75575
12733	Clcnka	chloride channel, voltage-sensitive Ka	ENSMUSG00000033770	47.0742	-0.157345	0.0964271	-1.63175	0.102732	0.75575
100072	Camta1	calmodulin binding transcription activator 1	ENSMUSG00000014592	11700.9	0.107072	0.0656475	1.63102	0.102886	0.75575
22793	Zyx	zyxin	ENSMUSG00000029860	1940	0.122845	0.0752649	1.63216	0.102645	0.75575
13063	Cycs	cytochrome c, somatic	ENSMUSG00000063694	2315.4	-0.116571	0.0716486	-1.62698	0.103742	0.75575
22718	Zfp60	zinc finger protein 60	ENSMUSG00000037640	721.718	0.142788	0.0877641	1.62695	0.103747	0.75575
NA	NA	NA	ENSMUSG00000052629	202.287	-0.173239	0.106406	-1.62809	0.103505	0.75575
101490	Inpp5f	inositol polyphosphate-5-phosphatase F	ENSMUSG00000042105	4309.39	-0.131302	0.0806593	-1.62786	0.103554	0.75575
79196	Osbpl5	oxysterol binding protein-like 5	ENSMUSG00000037606	623.63	0.149401	0.0915874	1.63124	0.102839	0.75575
21376	Tbrg1	transforming growth factor beta regulated gene 1	ENSMUSG00000011114	1505.11	0.126181	0.0774403	1.62939	0.10323	0.75575
244853	Nxpe4	neurexophilin and PC-esterase domain family, member 4	ENSMUSG00000044229	100.434	0.174692	0.10742	1.62625	0.103896	0.75575
114716	Spred2	sprouty-related, EVH1 domain containing 2	ENSMUSG00000045671	3226.81	-0.120086	0.0738332	-1.62645	0.103853	0.75575
71956	Rnf135	ring finger protein 135	ENSMUSG00000020707	59.8997	0.16343	0.100186	1.63127	0.102833	0.75575
70422	Ints2	integrator complex subunit 2	ENSMUSG00000018068	431.774	0.155573	0.0953259	1.63201	0.102677	0.75575
76719	Kansl1	KAT8 regulatory NSL complex subunit 1	ENSMUSG00000018412	1861.79	-0.119993	0.0736016	-1.6303	0.103038	0.75575
217370	BC017643	cDNA sequence BC017643	ENSMUSG00000039294	527.545	-0.149934	0.0920909	-1.62811	0.103501	0.75575
30946	Abt1	activator of basal transcription 1	ENSMUSG00000036376	494.975	0.152517	0.0935234	1.63079	0.102935	0.75575
218194	Phactr1	phosphatase and actin regulator 1	ENSMUSG00000054728	13694.5	-0.1106	0.0677987	-1.63129	0.102828	0.75575
54375	Azin1	antizyme inhibitor 1	ENSMUSG00000037458	5498.82	0.108257	0.0665215	1.62739	0.103654	0.75575
93888	Pcdhb17	protocadherin beta 17	ENSMUSG00000046387	439.578	-0.159794	0.0982792	-1.62592	0.103967	0.755839
27062	Cadps	Ca2+-dependent secretion activator	ENSMUSG00000054423	8770.21	0.111816	0.0687921	1.62541	0.104074	0.75619
75687	Ripor1	RHO family interacting cell polarization regulator 1	ENSMUSG00000038604	5291.31	-0.12996	0.0799959	-1.62459	0.10425	0.757038
83797	Smarcd1	SWI/SNF related, matrix associated, actin dependent regulator of chromatin, subfamily d, member 1	ENSMUSG00000023018	4431.19	-0.105089	0.0647303	-1.62349	0.104485	0.758314
11737	Anp32a	acidic (leucine-rich) nuclear phosphoprotein 32 family, member A	ENSMUSG00000032249	4945.36	0.119957	0.0739269	1.62265	0.104665	0.759191
213417	Klhdc8a	kelch domain containing 8A	ENSMUSG00000042115	277.507	-0.171762	0.105874	-1.62232	0.104736	0.759274
26896	Med14	mediator complex subunit 14	ENSMUSG00000064127	2594.04	-0.126191	0.0778805	-1.62032	0.105164	0.76082
20585	Hltf	helicase-like transcription factor	ENSMUSG00000002428	396.4	0.15534	0.0959255	1.61939	0.105364	0.76082
277854	Depdc5	DEP domain containing 5	ENSMUSG00000037426	1592.46	-0.146659	0.0905355	-1.61991	0.105252	0.76082
13008	Csrp2	cysteine and glycine-rich protein 2	ENSMUSG00000020186	103.313	0.174172	0.107508	1.62009	0.105214	0.76082
71946	Endod1	endonuclease domain containing 1	ENSMUSG00000037419	1454.04	-0.129349	0.0798639	-1.61962	0.105315	0.76082
18854	Pml	promyelocytic leukemia	ENSMUSG00000036986	159.448	0.173864	0.107343	1.61971	0.105295	0.76082
106326	Osbpl11	oxysterol binding protein-like 11	ENSMUSG00000022807	913.521	-0.151443	0.0934755	-1.62013	0.105204	0.76082
216166	Plk5	polo like kinase 5	ENSMUSG00000035486	70.9905	-0.166367	0.102758	-1.61902	0.105444	0.760963
81489	Dnajb1	DnaJ heat shock protein family (Hsp40) member B1	ENSMUSG00000005483	1850.68	-0.11944	0.0738033	-1.61835	0.105587	0.761232
66910	Tmem107	transmembrane protein 107	ENSMUSG00000020895	81.8749	-0.171595	0.106034	-1.61829	0.1056	0.761232
210933	Adgrb3	adhesion G protein-coupled receptor B3	ENSMUSG00000033569	4045.48	-0.112651	0.0696778	-1.61675	0.105933	0.763203
19275	Ptprn	protein tyrosine phosphatase, receptor type, N	ENSMUSG00000026204	26222.6	0.0975535	0.060365	1.61606	0.106082	0.763498
72649	Tmem209	transmembrane protein 209	ENSMUSG00000029782	478.66	0.153253	0.0948345	1.61601	0.106093	0.763498
77065	Ints7	integrator complex subunit 7	ENSMUSG00000037461	620.184	0.142637	0.0883732	1.61403	0.106522	0.763626
230657	Tmem69	transmembrane protein 69	ENSMUSG00000055900	214.66	-0.170717	0.105707	-1.615	0.10631	0.763626
76071	Jakmip1	janus kinase and microtubule interacting protein 1	ENSMUSG00000063646	692.603	-0.138729	0.0859534	-1.614	0.106528	0.763626
21750	Terf2	telomeric repeat binding factor 2	ENSMUSG00000031921	1263.53	0.123241	0.0763191	1.61481	0.106352	0.763626
11891	Rab27a	RAB27A, member RAS oncogene family	ENSMUSG00000032202	175.159	0.171416	0.106187	1.61428	0.106466	0.763626
56322	Timm22	translocase of inner mitochondrial membrane 22	ENSMUSG00000020843	435.466	-0.152426	0.0944297	-1.61417	0.10649	0.763626
78251	Zfp712	zinc finger protein 712	ENSMUSG00000090641	137.231	0.173618	0.107566	1.61407	0.106513	0.763626
98403	Zfp451	zinc finger protein 451	ENSMUSG00000042197	1443.36	0.122419	0.0759404	1.61204	0.106952	0.764398
12304	Pdia4	protein disulfide isomerase associated 4	ENSMUSG00000025823	1456.9	0.128053	0.0793944	1.61287	0.106773	0.764398
54200	Sult2b1	sulfotransferase family, cytosolic, 2B, member 1	ENSMUSG00000003271	465.4	0.151546	0.0940192	1.61186	0.106993	0.764398
330998	Ankrd34c	ankyrin repeat domain 34C	ENSMUSG00000047606	42.4509	-0.143038	0.0887345	-1.61198	0.106967	0.764398
140721	Caskin2	CASK-interacting protein 2	ENSMUSG00000034471	59.3454	0.161836	0.100388	1.61211	0.106939	0.764398
78834	Zfp623	zinc finger protein 623	ENSMUSG00000050846	319.833	0.160843	0.0997778	1.61201	0.10696	0.764398
16538	Kcns1	K+ voltage-gated channel, subfamily S, 1	ENSMUSG00000040164	582.777	-0.144785	0.0898867	-1.61075	0.107233	0.764835
69878	Snrpf	small nuclear ribonucleoprotein polypeptide F	ENSMUSG00000020018	369.466	-0.166191	0.103155	-1.61107	0.107164	0.764835
66904	Pccb	propionyl Coenzyme A carboxylase, beta polypeptide	ENSMUSG00000032527	1962.01	0.126208	0.0783404	1.61102	0.107175	0.764835
13347	Dffa	DNA fragmentation factor, alpha subunit	ENSMUSG00000028974	1547.41	-0.120919	0.0750911	-1.6103	0.107332	0.765113
26875	Pclo	piccolo (presynaptic cytomatrix protein)	ENSMUSG00000061601	2803.55	-0.141829	0.0881084	-1.60971	0.107461	0.765608
26398	Map2k4	mitogen-activated protein kinase kinase 4	ENSMUSG00000033352	9542.29	-0.10546	0.0655316	-1.60931	0.10755	0.765812
26431	Git2	G protein-coupled receptor kinase-interactor 2	ENSMUSG00000041890	862.705	0.14276	0.088747	1.60862	0.1077	0.766035
104069	Sncb	synuclein, beta	ENSMUSG00000034891	15869	-0.112844	0.0701439	-1.60875	0.10767	0.766035
65247	Asb1	ankyrin repeat and SOCS box-containing 1	ENSMUSG00000026311	1791.59	-0.11875	0.073862	-1.60773	0.107894	0.766985
232984	B3gnt8	UDP-GlcNAc:betaGal beta-1,3-N-acetylglucosaminyltransferase 8	ENSMUSG00000059479	37.0569	-0.145901	0.0907678	-1.60741	0.107964	0.767058
15194	Htt	huntingtin	ENSMUSG00000029104	3573.65	0.120024	0.0747323	1.60606	0.108262	0.768323
268445	Ankrd13b	ankyrin repeat domain 13b	ENSMUSG00000037907	4249.18	-0.113879	0.0708946	-1.60631	0.108206	0.768323
239706	Mettl22	methyltransferase like 22	ENSMUSG00000039345	505.143	0.152158	0.0947721	1.60551	0.108381	0.768743
116914	Slc19a2	solute carrier family 19 (thiamine transporter), member 2	ENSMUSG00000040918	316.9	0.160074	0.099722	1.6052	0.10845	0.768805
27205	Podxl	podocalyxin-like	ENSMUSG00000025608	268.479	0.167185	0.10417	1.60493	0.10851	0.768805
70082	Lysmd2	LysM, putative peptidoglycan-binding, domain containing 2	ENSMUSG00000032184	1455.05	-0.125692	0.0783354	-1.60453	0.108597	0.769001
67455	Klhl13	kelch-like 13	ENSMUSG00000036782	820.887	-0.140755	0.0878137	-1.60288	0.108962	0.770716
245666	Iqsec2	IQ motif and Sec7 domain 2	ENSMUSG00000041115	8273.97	-0.172395	0.107779	-1.59952	0.109706	0.770716
20360	Sema6c	sema domain, transmembrane domain (TM), and cytoplasmic domain, (semaphorin) 6C	ENSMUSG00000038777	1101.74	-0.136441	0.0852688	-1.60012	0.109571	0.770716
242667	Dlgap3	DLG associated protein 3	ENSMUSG00000042388	13179.2	-0.101368	0.06332	-1.60088	0.109403	0.770716
70433	Draxin	dorsal inhibitory axon guidance protein	ENSMUSG00000029005	35.4152	0.141349	0.0883474	1.59993	0.109615	0.770716
17347	Mknk2	MAP kinase-interacting serine/threonine kinase 2	ENSMUSG00000020190	1800.61	0.122909	0.0768345	1.59966	0.109675	0.770716
218756	Slc4a7	solute carrier family 4, sodium bicarbonate cotransporter, member 7	ENSMUSG00000021733	1230.33	0.135499	0.0846554	1.60059	0.109468	0.770716
56419	Diaph3	diaphanous related formin 3	ENSMUSG00000022021	61.7458	-0.160138	0.100029	-1.60091	0.109396	0.770716
15165	Hcn1	hyperpolarization-activated, cyclic nucleotide-gated K+ 1	ENSMUSG00000021730	2317.15	-0.114348	0.0714965	-1.59936	0.109742	0.770716
11845	Arf6	ADP-ribosylation factor 6	ENSMUSG00000044147	800.737	-0.143739	0.0898511	-1.59975	0.109654	0.770716
11515	Adcy9	adenylate cyclase 9	ENSMUSG00000005580	1911.97	-0.172628	0.107681	-1.60313	0.108905	0.770716
57738	Slc15a2	solute carrier family 15 (H+/peptide transporter), member 2	ENSMUSG00000022899	81.9815	0.167638	0.104721	1.60081	0.109418	0.770716
NA	NA	NA	ENSMUSG00000109836	703.781	-0.151835	0.0949195	-1.59962	0.109683	0.770716
93707	Pcdhgc4	protocadherin gamma subfamily C, 4	ENSMUSG00000023036	194.558	0.171534	0.107173	1.60053	0.109481	0.770716
67160	Eef1g	eukaryotic translation elongation factor 1 gamma	ENSMUSG00000071644	3106.7	-0.108433	0.0677448	-1.60061	0.109464	0.770716
15550	Htr1a	5-hydroxytryptamine (serotonin) receptor 1A	ENSMUSG00000021721	978.702	-0.134243	0.0839524	-1.59904	0.109812	0.77079
53599	Cd164	CD164 antigen	ENSMUSG00000019818	714.349	0.136008	0.0850822	1.59855	0.109921	0.770969
12669	Chrm1	cholinergic receptor, muscarinic 1, CNS	ENSMUSG00000032773	11622.4	-0.106909	0.0668859	-1.59838	0.109958	0.770969
69601	Dab2ip	disabled 2 interacting protein	ENSMUSG00000026883	4115.06	-0.11174	0.0699264	-1.59797	0.11005	0.771189
270066	Slc35e1	solute carrier family 35, member E1	ENSMUSG00000019731	1792.55	-0.124777	0.0780981	-1.59769	0.110112	0.771202
13875	Erf	Ets2 repressor factor	ENSMUSG00000040857	1489.05	-0.123721	0.077485	-1.59671	0.110331	0.77232
100502736	Gm19345	predicted gene, 19345	ENSMUSG00000092216	51.5187	-0.159579	0.099968	-1.5963	0.110421	0.772527
20536	Slc4a3	solute carrier family 4 (anion exchanger), member 3	ENSMUSG00000006576	3745.83	-0.133364	0.0836381	-1.59454	0.110816	0.774402
278097	Armcx6	armadillo repeat containing, X-linked 6	ENSMUSG00000050394	49.5001	0.157929	0.0991038	1.59357	0.111033	0.774402
22689	Zfp27	zinc finger protein 27	ENSMUSG00000062040	574.607	0.146151	0.0916552	1.59458	0.110807	0.774402
56542	Ick	intestinal cell kinase	ENSMUSG00000009828	522.337	0.144537	0.0907045	1.59349	0.111051	0.774402
105853	Mal2	mal, T cell differentiation protein 2	ENSMUSG00000024479	5754.96	-0.124587	0.078162	-1.59396	0.110946	0.774402
57315	Wdr46	WD repeat domain 46	ENSMUSG00000024312	297.344	-0.161956	0.101637	-1.59348	0.111052	0.774402
22629	Ywhah	tyrosine 3-monooxygenase/tryptophan 5-monooxygenase activation protein, eta polypeptide	ENSMUSG00000018965	52955.8	0.100545	0.0631098	1.59318	0.11112	0.77446
229725	Clcc1	chloride channel CLIC-like 1	ENSMUSG00000027884	381.952	0.1541	0.0967986	1.59196	0.111394	0.775662
30841	Kdm2b	lysine (K)-specific demethylase 2B	ENSMUSG00000029475	1016.67	0.140575	0.0883081	1.59187	0.111414	0.775662
226422	Rab29	RAB29, member RAS oncogene family	ENSMUSG00000026433	87.0098	0.169341	0.106441	1.59094	0.111624	0.776281
14407	Gabrg3	gamma-aminobutyric acid (GABA) A receptor, subunit gamma 3	ENSMUSG00000055026	736.31	-0.145573	0.0914913	-1.59112	0.111583	0.776281
66181	Nop10	NOP10 ribonucleoprotein	ENSMUSG00000027133	751.286	-0.144122	0.0906178	-1.59044	0.111736	0.776404
54391	Rfk	riboflavin kinase	ENSMUSG00000024712	1440.27	-0.126605	0.0796098	-1.59032	0.111763	0.776404
77794	Adamtsl2	ADAMTS-like 2	ENSMUSG00000036040	137.797	-0.171071	0.107637	-1.58933	0.111986	0.77725
76438	Rftn1	raftlin lipid raft linker 1	ENSMUSG00000039316	450.643	0.149444	0.0940505	1.58897	0.112067	0.77725
83921	Tmem2	transmembrane protein 2	ENSMUSG00000024754	354.493	-0.163276	0.102754	-1.58901	0.112058	0.77725
22026	Nr2c2	nuclear receptor subfamily 2, group C, member 2	ENSMUSG00000005893	3099.41	-0.109722	0.0691027	-1.58781	0.112329	0.778227
20743	Sptbn2	spectrin beta, non-erythrocytic 2	ENSMUSG00000067889	23950.5	-0.135649	0.0854276	-1.58788	0.112313	0.778227
227700	Sh3glb2	SH3-domain GRB2-like endophilin B2	ENSMUSG00000026860	4234.58	-0.107216	0.0675814	-1.58647	0.112632	0.778545
100042194	Gm13446	predicted gene 13446	ENSMUSG00000086555	186.823	-0.171063	0.107772	-1.58726	0.112453	0.778545
12258	Serping1	serine (or cysteine) peptidase inhibitor, clade G, member 1	ENSMUSG00000023224	77.2068	0.167665	0.105647	1.58703	0.112506	0.778545
69504	Zfp932	zinc finger protein 932	ENSMUSG00000066613	276.014	0.16546	0.104325	1.586	0.112739	0.778545
15500	Hsf2	heat shock factor 2	ENSMUSG00000019878	822.326	0.134106	0.0845529	1.58605	0.112727	0.778545
83561	Tdrd1	tudor domain containing 1	ENSMUSG00000025081	42.9097	0.148873	0.093862	1.58608	0.11272	0.778545
211253	Mtrf1	mitochondrial translational release factor 1	ENSMUSG00000022022	182.857	0.168096	0.106117	1.58406	0.113179	0.7811
26420	Mapk9	mitogen-activated protein kinase 9	ENSMUSG00000020366	5017.45	-0.114888	0.0725591	-1.58338	0.113336	0.7811
NA	NA	NA	ENSMUSG00000022639	206.801	-0.166588	0.105216	-1.5833	0.113353	0.7811
75296	Fgfr1op	Fgfr1 oncogene partner	ENSMUSG00000069135	350.288	0.159706	0.100868	1.58332	0.113348	0.7811
71198	Otud1	OTU domain containing 1	ENSMUSG00000043415	455.331	-0.150984	0.095393	-1.58276	0.113477	0.781116
333050	Ksr2	kinase suppressor of ras 2	ENSMUSG00000061578	2281.57	-0.134783	0.085143	-1.58302	0.113417	0.781116
226359	C1ql2	complement component 1, q subcomponent-like 2	ENSMUSG00000036907	1451.04	0.138875	0.0878301	1.58117	0.113838	0.781383
59026	Huwe1	HECT, UBA and WWE domain containing 1	ENSMUSG00000025261	6551.44	-0.131898	0.0834235	-1.58106	0.113863	0.781383
635253	Usp51	ubiquitin specific protease 51	ENSMUSG00000067215	43.769	-0.152001	0.0961016	-1.58167	0.113724	0.781383
69863	Ttc39b	tetratricopeptide repeat domain 39B	ENSMUSG00000038172	1028.56	-0.13351	0.0844336	-1.58124	0.113823	0.781383
26466	Zfp260	zinc finger protein 260	ENSMUSG00000049421	1975.87	-0.115895	0.0732789	-1.58156	0.113751	0.781383
17171	Mas1	MAS1 oncogene	ENSMUSG00000068037	1505.56	0.126538	0.0800375	1.58098	0.113882	0.781383
226856	Lpgat1	lysophosphatidylglycerol acyltransferase 1	ENSMUSG00000026623	4769.56	-0.109663	0.0694377	-1.57929	0.114269	0.783619
214253	Etnk2	ethanolamine kinase 2	ENSMUSG00000070644	30.9897	0.138927	0.0879855	1.57897	0.114342	0.783702
224703	2021-03-02	membrane-associated ring finger (C3HC4) 2	ENSMUSG00000079557	791.8	-0.142183	0.0900813	-1.57838	0.114478	0.784213
77938	Fam53b	family with sequence similarity 53, member B	ENSMUSG00000030956	708.921	-0.150095	0.0951154	-1.57803	0.114558	0.784342
94229	Slc4a10	solute carrier family 4, sodium bicarbonate cotransporter-like, member 10	ENSMUSG00000026904	6371.94	0.104561	0.0662963	1.57717	0.114755	0.784438
66552	Sppl2a	signal peptide peptidase like 2A	ENSMUSG00000027366	637.171	0.144326	0.091494	1.57744	0.114695	0.784438
28015	Polr2m	polymerase (RNA) II (DNA directed) polypeptide M	ENSMUSG00000032199	3440.11	-0.118816	0.0753108	-1.57767	0.114641	0.784438
57778	Fmnl1	formin-like 1	ENSMUSG00000055805	5752.57	-0.111398	0.0706574	-1.57659	0.114889	0.784931
67399	Pdlim7	PDZ and LIM domain 7	ENSMUSG00000021493	990.977	-0.12906	0.081878	-1.57625	0.114969	0.784957
223922	Atf7	activating transcription factor 7	ENSMUSG00000099083	363.808	-0.160494	0.101833	-1.57605	0.115015	0.784957
NA	NA	NA	ENSMUSG00000043903	60.6761	0.159914	0.101501	1.57549	0.115142	0.785406
22145	Tuba4a	tubulin, alpha 4A	ENSMUSG00000026202	26859.9	-0.100846	0.0640325	-1.57492	0.115275	0.785475
66871	Cpne8	copine VIII	ENSMUSG00000052560	1138.02	-0.128355	0.0814942	-1.57502	0.115251	0.785475
67426	Coq8a	coenzyme Q8A	ENSMUSG00000026489	2119.12	0.127717	0.0811415	1.574	0.115486	0.785664
93759	Sirt1	sirtuin 1	ENSMUSG00000020063	247.252	0.164886	0.104748	1.57412	0.11546	0.785664
58801	Pmaip1	phorbol-12-myristate-13-acetate-induced protein 1	ENSMUSG00000024521	34.6374	0.134528	0.0854455	1.57443	0.115389	0.785664
11928	Atp1a1	ATPase, Na+/K+ transporting, alpha 1 polypeptide	ENSMUSG00000033161	25555.9	0.0941147	0.0598039	1.57372	0.115552	0.785667
230379	Acer2	alkaline ceramidase 2	ENSMUSG00000038007	56.8195	-0.15823	0.100561	-1.57347	0.11561	0.785667
433485	Syndig1	synapse differentiation inducing 1	ENSMUSG00000074736	1502.15	-0.124568	0.0791981	-1.57286	0.11575	0.78574
59035	Carm1	coactivator-associated arginine methyltransferase 1	ENSMUSG00000032185	2469.74	-0.115689	0.0735639	-1.57263	0.115804	0.78574
71991	Ercc8	excision repaiross-complementing rodent repair deficiency, complementation group 8	ENSMUSG00000021694	212.374	-0.165795	0.105391	-1.57315	0.115685	0.78574
13193	Dcx	doublecortin	ENSMUSG00000031285	653.097	0.154224	0.0981004	1.57211	0.115925	0.786147
67388	1110008F13Rik	RIKEN cDNA 1110008F13 gene	ENSMUSG00000027637	1108.64	-0.135708	0.0863409	-1.57177	0.116004	0.786147
19259	Ptpn5	protein tyrosine phosphatase, non-receptor type 5	ENSMUSG00000030854	4162.87	-0.105159	0.0669127	-1.57158	0.116048	0.786147
214742	Rcor3	REST corepressor 3	ENSMUSG00000037395	407.208	0.149387	0.095172	1.56965	0.116496	0.787359
26877	B3galt1	UDP-Gal:betaGlcNAc beta 1,3-galactosyltransferase, polypeptide 1	ENSMUSG00000034780	1235.18	-0.128392	0.0817597	-1.57035	0.116333	0.787359
21894	Tln1	talin 1	ENSMUSG00000028465	330.095	0.156172	0.0994789	1.5699	0.116439	0.787359
69094	Tmem160	transmembrane protein 160	ENSMUSG00000019158	865.818	-0.140779	0.0897041	-1.56937	0.116562	0.787359
217473	Ankmy2	ankyrin repeat and MYND domain containing 2	ENSMUSG00000036188	1686.88	0.119991	0.0764649	1.56922	0.116596	0.787359
74720	Tmem114	transmembrane protein 114	ENSMUSG00000022715	443.75	0.154421	0.0983936	1.56943	0.116549	0.787359
66914	Vps28	vacuolar protein sorting 28	ENSMUSG00000059323	171.867	-0.167656	0.106872	-1.56876	0.116704	0.787676
72749	Tonsl	tonsoku-like, DNA repair protein	ENSMUSG00000059323	171.867	-0.167656	0.106872	-1.56876	0.116704	0.787676
320799	Zhx3	zinc fingers and homeoboxes 3	ENSMUSG00000035877	2135.72	-0.122819	0.0783065	-1.56844	0.116779	0.787765
66467	Gtf2h5	general transcription factor IIH, polypeptide 5	ENSMUSG00000034345	2018.5	-0.120711	0.0769833	-1.56802	0.116878	0.788017
14617	Gjd2	gap junction protein, delta 2	ENSMUSG00000068615	140.284	0.168673	0.107685	1.56636	0.117265	0.788142
80892	Zfhx4	zinc finger homeodomain 4	ENSMUSG00000025255	74.0035	-0.162336	0.103611	-1.56679	0.117164	0.788142
269113	Nup54	nucleoporin 54	ENSMUSG00000034826	358.684	0.15404	0.0983326	1.56652	0.117228	0.788142
56449	Ybx3	Y box protein 3	ENSMUSG00000030189	763.455	-0.137717	0.0879024	-1.5667	0.117184	0.788142
74187	Katnb1	katanin p80 (WD40-containing) subunit B 1	ENSMUSG00000031787	1502.12	-0.123147	0.0785861	-1.56703	0.117108	0.788142
18163	Ctnnd2	catenin (cadherin associated protein), delta 2	ENSMUSG00000022240	9275.98	-0.107975	0.0689184	-1.5667	0.117185	0.788142
320632	Snrnp200	small nuclear ribonucleoprotein 200 (U5)	ENSMUSG00000003660	2521.09	0.115304	0.0736299	1.56599	0.11735	0.788302
71514	Sfpq	splicing factor proline/glutamine rich (polypyrimidine tract binding protein associated)	ENSMUSG00000028820	6447.04	0.108487	0.0692902	1.5657	0.11742	0.788353
269295	Rtn4rl2	reticulon 4 receptor-like 2	ENSMUSG00000050896	3693.44	0.119664	0.0765225	1.56378	0.117869	0.788482
72425	Katnbl1	katanin p80 subunit B like 1	ENSMUSG00000027132	152.962	0.168144	0.107458	1.56474	0.117643	0.788482
20527	Slc2a3	solute carrier family 2 (facilitated glucose transporter), member 3	ENSMUSG00000003153	7994.94	0.104556	0.0668534	1.56396	0.117827	0.788482
105651	Ppp1r3e	protein phosphatase 1, regulatory (inhibitor) subunit 3E	ENSMUSG00000072494	193.905	-0.167896	0.107317	-1.56449	0.117702	0.788482
105670	Rcbtb2	regulator of chromosome condensation (RCC1) and BTB (POZ) domain containing protein 2	ENSMUSG00000022106	703.605	0.136411	0.0872229	1.56394	0.117832	0.788482
102502	Pls1	plastin 1 (I-isoform)	ENSMUSG00000049493	49.8127	-0.153762	0.0983065	-1.5641	0.117793	0.788482
54152	Dnal4	dynein, axonemal, light chain 4	ENSMUSG00000022420	851.767	0.129785	0.0829928	1.56381	0.117863	0.788482
66495	Ndufb3	NADH dehydrogenase (ubiquinone) 1 beta subcomplex 3	ENSMUSG00000026032	1318.9	-0.125554	0.0803433	-1.56272	0.118118	0.788852
14221	Fjx1	four jointed box 1	ENSMUSG00000075012	1382.54	0.124636	0.0797941	1.56198	0.118294	0.788852
76763	Mospd2	motile sperm domain containing 2	ENSMUSG00000061778	181.381	0.16705	0.106948	1.56197	0.118294	0.788852
72961	Slc17a7	solute carrier family 17 (sodium-dependent inorganic phosphate cotransporter), member 7	ENSMUSG00000070570	50305.9	-0.116298	0.0744376	-1.56235	0.118206	0.788852
93961	B3galt5	UDP-Gal:betaGlcNAc beta 1,3-galactosyltransferase, polypeptide 5	ENSMUSG00000074892	1472.93	0.127378	0.0815361	1.56223	0.118233	0.788852
107182	Btaf1	B-TFIID TATA-box binding protein associated factor 1	ENSMUSG00000040565	407.812	0.138671	0.0887639	1.56225	0.11823	0.788852
19248	Ptpn12	protein tyrosine phosphatase, non-receptor type 12	ENSMUSG00000028771	648.254	0.141269	0.0904998	1.56099	0.118527	0.789173
215335	Slc36a1	solute carrier family 36 (proton/amino acid symporter), member 1	ENSMUSG00000020261	4152.16	-0.115547	0.0740094	-1.56124	0.118467	0.789173
69562	Cdk13	cyclin-dependent kinase 13	ENSMUSG00000041297	978.279	-0.132726	0.0850062	-1.56137	0.118436	0.789173
20257	Stmn2	stathmin-like 2	ENSMUSG00000027500	29087.3	0.098754	0.0633549	1.55874	0.119057	0.791173
73750	Whrn	whirlin	ENSMUSG00000039137	576.725	-0.160743	0.103151	-1.55833	0.119154	0.791173
16979	Lrrn1	leucine rich repeat protein 1, neuronal	ENSMUSG00000034648	2369.99	-0.126032	0.080885	-1.55817	0.119194	0.791173
NA	NA	NA	ENSMUSG00000108616	432.479	-0.153653	0.0986122	-1.55815	0.119198	0.791173
105675	Ppif	peptidylprolyl isomerase F (cyclophilin F)	ENSMUSG00000021868	639.416	-0.138427	0.0888342	-1.55826	0.119171	0.791173
72825	Mon1a	MON1 homolog A, secretory traffciking associated	ENSMUSG00000032583	722.291	-0.135114	0.0866835	-1.5587	0.119067	0.791173
101489	Ric8a	RIC8 guanine nucleotide exchange factor A	ENSMUSG00000025485	2487.81	0.11017	0.0707258	1.55771	0.119302	0.791455
432582	Ccdc92b	coiled-coil domain containing 92B	ENSMUSG00000069814	1287.13	-0.120116	0.0771459	-1.557	0.11947	0.792161
56079	Astn2	astrotactin 2	ENSMUSG00000028373	855.105	-0.164087	0.10541	-1.55665	0.119553	0.79227
67036	Mrpl45	mitochondrial ribosomal protein L45	ENSMUSG00000018882	989.964	-0.12721	0.0817328	-1.55641	0.11961	0.79227
320111	Prr18	proline rich 18	ENSMUSG00000055945	129.434	0.167605	0.107712	1.55604	0.119698	0.792444
19099	Mapk8ip1	mitogen-activated protein kinase 8 interacting protein 1	ENSMUSG00000027223	13384.4	0.103044	0.0662686	1.55494	0.11996	0.793361
225724	Mapk4	mitogen-activated protein kinase 4	ENSMUSG00000024558	1080.69	-0.133971	0.0861508	-1.55507	0.119928	0.793361
213484	Nudt18	nudix (nucleoside diphosphate linked moiety X)-type motif 18	ENSMUSG00000045211	1065.59	0.130933	0.0842649	1.55383	0.120225	0.794525
16779	Lamb2	laminin, beta 2	ENSMUSG00000052911	38.0274	0.144872	0.0932446	1.55368	0.12026	0.794525
67916	Plpp3	phospholipid phosphatase 3	ENSMUSG00000028517	286.218	0.164861	0.106233	1.55189	0.120689	0.795307
11548	Adra1b	adrenergic receptor, alpha 1b	ENSMUSG00000050541	89.6352	-0.159821	0.10294	-1.55257	0.120527	0.795307
238871	Pde4d	phosphodiesterase 4D, cAMP specific	ENSMUSG00000021699	823.219	-0.148229	0.0955103	-1.55197	0.120668	0.795307
75302	Asxl2	additional sex combs like 2, transcriptional regulator	ENSMUSG00000037486	321.063	-0.154131	0.0993156	-1.55193	0.120678	0.795307
319670	Eml5	echinoderm microtubule associated protein like 5	ENSMUSG00000051166	950.501	0.13033	0.0839292	1.55286	0.120457	0.795307
19092	Prkg2	protein kinase, cGMP-dependent, type II	ENSMUSG00000029334	37.7639	-0.14271	0.0920235	-1.5508	0.120951	0.795804
NA	NA	NA	ENSMUSG00000110080	63.561	0.154252	0.0994414	1.55118	0.120858	0.795804
67285	Cwc27	CWC27 spliceosome-associated protein	ENSMUSG00000021715	371.49	0.150383	0.0969561	1.55104	0.120892	0.795804
30050	Fbxw2	F-box and WD-40 domain protein 2	ENSMUSG00000035949	1690.84	-0.112863	0.0728674	-1.54888	0.121412	0.797607
207212	Arhgef17	Rho guanine nucleotide exchange factor (GEF) 17	ENSMUSG00000032875	9177.4	-0.12003	0.0774945	-1.54888	0.12141	0.797607
NA	NA	NA	ENSMUSG00000038152	70.7075	-0.161294	0.104136	-1.54888	0.12141	0.797607
27354	Nbn	nibrin	ENSMUSG00000028224	344.629	-0.152484	0.0984862	-1.54827	0.121556	0.79815
331392	Gm5124	nucleolar and coiled-body phosphoprotein 1 pseudogene	ENSMUSG00000051537	671.911	-0.14487	0.0936555	-1.54684	0.121901	0.798367
68659	Fam198b	family with sequence similarity 198, member B	ENSMUSG00000027955	138.799	-0.166067	0.107352	-1.54694	0.121879	0.798367
99586	Dpyd	dihydropyrimidine dehydrogenase	ENSMUSG00000033308	338.193	0.154669	0.0999628	1.54727	0.121799	0.798367
15569	Elavl2	ELAV like RNA binding protein 1	ENSMUSG00000008489	2835.92	0.112392	0.0726415	1.54722	0.12181	0.798367
104027	Synpo	synaptopodin	ENSMUSG00000043079	8638.85	-0.111001	0.0717538	-1.54696	0.121872	0.798367
68948	Fam216a	family with sequence similarity 216, member A	ENSMUSG00000029463	2105.05	-0.110844	0.0717031	-1.54588	0.122134	0.798879
75914	Exoc6b	exocyst complex component 6B	ENSMUSG00000033769	3351.51	-0.112865	0.0730164	-1.54575	0.122166	0.798879
217517	Stxbp6	syntaxin binding protein 6 (amisyn)	ENSMUSG00000046314	1239.68	0.127255	0.0823218	1.54583	0.122146	0.798879
12816	Col12a1	collagen, type XII, alpha 1	ENSMUSG00000032332	123.131	0.166137	0.10751	1.54532	0.12227	0.799149
327655	Ppip5k1	diphosphoinositol pentakisphosphate kinase 1	ENSMUSG00000033526	2855.84	-0.110296	0.0714286	-1.54414	0.122555	0.79979
235472	Prtg	protogenin	ENSMUSG00000036030	30.1118	0.134671	0.0872019	1.54436	0.122501	0.79979
20379	Sfrp4	secreted frizzled-related protein 4	ENSMUSG00000021319	39.4055	0.138785	0.0898626	1.54441	0.122489	0.79979
NA	NA	NA	ENSMUSG00000088246	61.0991	-0.146055	0.0946329	-1.54339	0.122737	0.800572
108958	Miga2	mitoguardin 2	ENSMUSG00000026858	2439.83	-0.107912	0.0699479	-1.54275	0.122892	0.801172
18798	Plcb4	phospholipase C, beta 4	ENSMUSG00000039943	332.307	-0.15716	0.101895	-1.54237	0.122983	0.801197
67248	Rpl39	ribosomal protein L39	ENSMUSG00000079641	339.515	-0.15371	0.0996679	-1.54222	0.123021	0.801197
60599	Trp53inp1	transformation related protein 53 inducible nuclear protein 1	ENSMUSG00000028211	119.635	0.165867	0.107579	1.54181	0.123119	0.80143
74440	Cmip	c-Maf inducing protein	ENSMUSG00000034390	7349.5	-0.136582	0.0886054	-1.54147	0.123203	0.801572
51801	Ramp1	receptor (calcitonin) activity modifying protein 1	ENSMUSG00000034353	1151.95	-0.13844	0.0898897	-1.54011	0.123533	0.801906
329575	Gm14325	predicted gene 14325	ENSMUSG00000095362	197.782	0.164358	0.106746	1.53971	0.12363	0.801906
213498	Arhgef11	Rho guanine nucleotide exchange factor (GEF) 11	ENSMUSG00000041977	3826.51	-0.120093	0.0779927	-1.5398	0.12361	0.801906
56401	P3h1	prolyl 3-hydroxylase 1	ENSMUSG00000028641	84.066	0.16253	0.105544	1.53993	0.123577	0.801906
67441	Isoc2b	isochorismatase domain containing 2b	ENSMUSG00000052605	76.8622	-0.159955	0.103881	-1.53979	0.123611	0.801906
26356	Ing1	inhibitor of growth family, member 1	ENSMUSG00000045969	573.156	-0.136703	0.088783	-1.53974	0.123623	0.801906
53416	Stk39	serine/threonine kinase 39	ENSMUSG00000027030	1700.95	-0.120474	0.0782584	-1.53943	0.123699	0.801945
233011	Itpkc	inositol 1,4,5-trisphosphate 3-kinase C	ENSMUSG00000003752	285.49	0.155577	0.101081	1.53914	0.123771	0.802008
70730	6330409D20Rik	RIKEN cDNA 6330409D20 gene	ENSMUSG00000009551	65.2255	0.159189	0.103541	1.53745	0.124184	0.803648
12877	Cpeb1	cytoplasmic polyadenylation element binding protein 1	ENSMUSG00000025586	1657.47	0.116465	0.0757658	1.53717	0.124252	0.803648
20442	St3gal1	ST3 beta-galactoside alpha-2,3-sialyltransferase 1	ENSMUSG00000013846	757.539	-0.145061	0.0943748	-1.53708	0.124275	0.803648
56149	Grasp	GRP1 (general receptor for phosphoinositides 1)-associated scaffold protein	ENSMUSG00000000531	3401.31	-0.111955	0.0728017	-1.53781	0.124094	0.803648
17855	Mvk	mevalonate kinase	ENSMUSG00000041939	563.226	-0.139866	0.0910201	-1.53665	0.124379	0.803918
56219	Extl1	exostoses (multiple)-like 1	ENSMUSG00000028838	2968.46	-0.107238	0.0698244	-1.53582	0.124582	0.804825
[truncated: 53,198 more rows]

## Sheet: All DEGs
ENTREZID	SYMBOL	GENENAME	GeneID	Base mean	log2(FC)	StdErr	Wald-Stats	pvalue	padj	Alternative name/Ortholog
26404	Map3k12	mitogen-activated protein kinase kinase kinase 12	ENSMUSG00000023050	10426.2	1.63653	0.0732556	22.34	1.50993e-110	1.93528e-106
16010	Igfbp4	insulin-like growth factor binding protein 4	ENSMUSG00000017493	3208.67	-0.993324	0.0687465	-14.4491	2.54025e-47	1.62792e-43
16476	Jun	jun proto-oncogene	ENSMUSG00000052684	5743.09	0.694441	0.0640659	10.8395	2.23743e-27	9.55904e-24
70686	Dusp16	dual specificity phosphatase 16	ENSMUSG00000030203	265.976	1.02649	0.102801	9.98518	1.76973e-23	5.67066e-20
27387	Sh2d3c	SH2 domain containing 3C	ENSMUSG00000059013	1269.54	0.782581	0.0789831	9.90821	3.8345e-23	9.82935e-20
NA	NA	NA	ENSMUSG00000084349	186.438	-1.03229	0.107362	-9.61501	6.91039e-22	1.47618e-18	Rpl3-ps1
56471	Stmn4	stathmin-like 4	ENSMUSG00000022044	12463.9	0.58679	0.0627636	9.3492	8.83115e-21	1.61698e-17
16949	Loxl1	lysyl oxidase-like 1	ENSMUSG00000032334	522.182	0.886821	0.0959193	9.2455	2.34146e-20	3.75131e-17
12062	Bdkrb2	bradykinin receptor, beta 2	ENSMUSG00000021070	109.688	0.957102	0.105759	9.04986	1.43151e-19	2.03863e-16
214855	Arid5a	AT rich interactive domain 5A (MRF1-like)	ENSMUSG00000037447	337.725	0.850101	0.0997778	8.51994	1.59636e-17	2.04606e-14
12123	Hrk	harakiri, BCL2 interacting protein (contains only BH3 domain)	ENSMUSG00000046607	3374.89	0.650782	0.0867644	7.50056	6.35446e-14	7.40411e-11
67445	C1qtnf4	C1q and tumor necrosis factor related protein 4	ENSMUSG00000040794	6358.22	-0.548959	0.074307	-7.38771	1.49375e-13	1.47273e-10
228550	Itpka	inositol 1,4,5-trisphosphate 3-kinase A	ENSMUSG00000027296	8351.91	-0.472075	0.0638659	-7.39165	1.45013e-13	1.47273e-10
54132	Pdlim1	PDZ and LIM domain 1 (elfin)	ENSMUSG00000055044	418.949	0.743131	0.103021	7.21342	5.45653e-13	4.99545e-10
105005	Fam84a	family with sequence similarity 84, member A	ENSMUSG00000020607	2261.23	-0.5404	0.0762551	-7.08673	1.37314e-12	1.1733e-09
232943	Klc3	kinesin light chain 3	ENSMUSG00000040714	132.3	0.752602	0.10745	7.00423	2.48349e-12	1.98943e-09
18791	Plat	plasminogen activator, tissue	ENSMUSG00000031538	1246.37	0.574221	0.0823722	6.97105	3.14575e-12	2.37171e-09
242259	Slc44a5	solute carrier family 44, member 5	ENSMUSG00000028360	1299.57	0.522832	0.0793758	6.58679	4.49422e-11	3.20014e-08
12351	Car4	carbonic anhydrase 4	ENSMUSG00000000805	1265.92	0.497336	0.0775592	6.41234	1.43305e-10	9.66705e-08
70713	Gpr137c	G protein-coupled receptor 137C	ENSMUSG00000049092	950.133	0.522828	0.0818105	6.39072	1.65111e-10	1.05811e-07
76161	Lamp5	lysosomal-associated membrane protein family, member 5	ENSMUSG00000027270	668.891	-0.556314	0.0877493	-6.33981	2.30042e-10	1.3402e-07
NA	Ctxnd1	NA	ENSMUSG00000097789	4371.28	-0.481668	0.0758975	-6.3463	2.20558e-10	1.3402e-07	Ctxnd1
66297	Pantr1	POU domain, class 3, transcription factor 3 adjacent noncoding transcript 1	ENSMUSG00000060424	513.863	-0.573529	0.0913542	-6.27808	3.42781e-10	1.91018e-07
12308	Calb2	calbindin 2	ENSMUSG00000003657	2580.09	0.440932	0.0707971	6.22811	4.72091e-10	2.52116e-07	calretinin
276829	Smtnl2	smoothelin-like 2	ENSMUSG00000045667	344.943	0.641621	0.103248	6.21436	5.15356e-10	2.64212e-07
12444	Ccnd2	cyclin D2	ENSMUSG00000000184	6242.12	0.440411	0.0710467	6.19889	5.68628e-10	2.80311e-07
18710	Pik3r3	phosphoinositide-3-kinase regulatory subunit 3	ENSMUSG00000028698	1478.89	0.482688	0.0783069	6.16405	7.09081e-10	3.36604e-07
12367	Casp3	caspase 3	ENSMUSG00000031628	431.515	0.620963	0.101142	6.1395	8.27801e-10	3.78926e-07
13052	Cxadr	coxsackie virus and adenovirus receptor	ENSMUSG00000022865	1404.55	0.503304	0.0822369	6.12017	9.34729e-10	4.13118e-07
21808	Tgfb2	transforming growth factor, beta 2	ENSMUSG00000039239	2636.56	0.474379	0.0779872	6.08278	1.18116e-09	5.04629e-07
12443	Ccnd1	cyclin D1	ENSMUSG00000070348	1278.46	0.477028	0.0787699	6.05597	1.39572e-09	5.77064e-07
74596	Cds1	CDP-diacylglycerol synthase 1	ENSMUSG00000029330	2770.35	-0.46985	0.0788084	-5.96192	2.49285e-09	9.98463e-07
12833	Col6a1	collagen, type VI, alpha 1	ENSMUSG00000001119	425.679	0.56078	0.0968081	5.7927	6.92653e-09	2.69022e-06
399548	Scn4b	sodium channel, type IV, beta	ENSMUSG00000046480	529.774	-0.527645	0.0912569	-5.78197	7.38301e-09	2.78318e-06
14395	Gabra2	gamma-aminobutyric acid (GABA) A receptor, subunit alpha 2	ENSMUSG00000000560	7562.6	0.502596	0.0875361	5.74159	9.37942e-09	3.43474e-06
84004	Mcam	melanoma cell adhesion molecule	ENSMUSG00000032135	200.83	0.599826	0.105765	5.67133	1.41693e-08	5.04467e-06
54139	Irf6	interferon regulatory factor 6	ENSMUSG00000026638	54.4809	0.529744	0.0940163	5.6346	1.75465e-08	6.0782e-06
98970	Fibcd1	fibrinogen C domain containing 1	ENSMUSG00000026841	9710.19	-0.406398	0.0732255	-5.54995	2.8575e-08	8.93283e-06
NA	NA	NA	ENSMUSG00000107272	183.525	-0.593419	0.106904	-5.55098	2.84079e-08	8.93283e-06	Gm34583
18708	Pik3r1	phosphoinositide-3-kinase regulatory subunit 1	ENSMUSG00000041417	3814.36	0.396736	0.0714705	5.55105	2.83963e-08	8.93283e-06
75415	Arhgap12	Rho GTPase activating protein 12	ENSMUSG00000041225	2033.42	-0.439387	0.079151	-5.55125	2.83632e-08	8.93283e-06
13590	Lefty1	left right determination factor 1	ENSMUSG00000038793	305.363	-0.55609	0.101322	-5.48833	4.05746e-08	1.2382e-05
383787	Ankrd63	ankyrin repeat domain 63	ENSMUSG00000078137	1142.69	-0.475472	0.0874362	-5.43793	5.39044e-08	1.60673e-05
18991	Pou3f1	POU domain, class 3, transcription factor 1	ENSMUSG00000090125	3565.93	-0.470021	0.0870821	-5.39744	6.75991e-08	1.96913e-05
15511	Hspa1b	heat shock protein 1B	ENSMUSG00000090877	610.927	0.483818	0.0906262	5.33861	9.36623e-08	2.66771e-05
17155	Man1a	mannosidase 1, alpha	ENSMUSG00000003746	1733.34	-0.411607	0.0798646	-5.15381	2.55244e-07	7.11186e-05
13199	Ddn	dendrin	ENSMUSG00000059213	35590.6	-0.363199	0.070913	-5.12176	3.02702e-07	8.25475e-05
14766	Adgrg1	adhesion G protein-coupled receptor G1	ENSMUSG00000031785	1176.29	0.428788	0.0842142	5.09164	3.54983e-07	9.28533e-05	Gpr56
223726	Mpped1	metallophosphoesterase domain containing 1	ENSMUSG00000041708	6989.75	-0.349236	0.06856	-5.09387	3.5083e-07	9.28533e-05
17260	Mef2c	myocyte enhancer factor 2C	ENSMUSG00000005583	2047.17	-0.445901	0.0877609	-5.08086	3.75734e-07	9.63157e-05
27981	Rsrp1	arginine/serine rich protein 1	ENSMUSG00000037266	3462.65	0.370393	0.073038	5.07123	3.95246e-07	9.93307e-05
11639	Ak4	adenylate kinase 4	ENSMUSG00000028527	3573.36	0.352176	0.0699668	5.03348	4.81668e-07	0.000118722
58869	Pex5l	peroxisomal biogenesis factor 5-like	ENSMUSG00000027674	6024.18	-0.386927	0.077028	-5.02319	5.08191e-07	0.000122404
64074	Smoc2	SPARC related modular calcium binding 2	ENSMUSG00000023886	1156.09	0.405472	0.0807653	5.02038	5.15706e-07	0.000122404
98402	Sh3bp4	SH3-domain binding protein 4	ENSMUSG00000036206	1221.11	-0.427651	0.0853949	-5.00792	5.50203e-07	0.000128217
50723	Icosl	icos ligand	ENSMUSG00000000732	260.638	0.511773	0.102625	4.98683	6.13781e-07	0.000140479
16497	Kcnab1	potassium voltage-gated channel, shaker-related subfamily, beta member 1	ENSMUSG00000027827	3372.73	-0.331368	0.0671586	-4.93411	8.05177e-07	0.000181052
399603	Fam84b	family with sequence similarity 84, member B	ENSMUSG00000072568	365.985	-0.481068	0.0980574	-4.90599	9.29589e-07	0.000205423
19242	Ptn	pleiotrophin	ENSMUSG00000029838	2804.03	-0.334794	0.0685241	-4.88579	1.03017e-06	0.000223791
56338	Txnip	thioredoxin interacting protein	ENSMUSG00000038393	254.08	0.511919	0.104981	4.87628	1.08105e-06	0.000230931
237403	Lingo3	leucine rich repeat and Ig domain containing 3	ENSMUSG00000051067	2179.48	-0.387051	0.079814	-4.84941	1.23828e-06	0.000260181
14580	Gfap	glial fibrillary acidic protein	ENSMUSG00000020932	382.451	0.494825	0.102255	4.83912	1.30418e-06	0.000269609
30806	Adamts8	a disintegrin-like and metallopeptidase (reprolysin type) with thrombospondin type 1 motif, 8	ENSMUSG00000031994	304.556	0.496444	0.103024	4.81871	1.44486e-06	0.00029395
12747	Clk1	CDC-like kinase 1	ENSMUSG00000026034	572.657	0.469024	0.0975357	4.80874	1.51884e-06	0.000304171
67784	Plxnd1	plexin D1	ENSMUSG00000030123	1470.89	-0.435545	0.0909458	-4.78907	1.67558e-06	0.000330398
18530	Pcdh8	protocadherin 8	ENSMUSG00000036422	3626.96	0.339076	0.0711216	4.76756	1.86474e-06	0.000362128
13447	Doc2b	double C2, beta	ENSMUSG00000020848	5134.11	-0.320289	0.0678282	-4.72206	2.33473e-06	0.00044663
353342	Peg13	paternally expressed 13	ENSMUSG00000106847	5894.64	-0.311065	0.0662788	-4.69328	2.68858e-06	0.000506758
106759	Ticam1	toll-like receptor adaptor molecule 1	ENSMUSG00000047123	127.95	0.504859	0.107736	4.68608	2.78487e-06	0.0005173
230784	Sesn2	sestrin 2	ENSMUSG00000028893	1003.78	0.40866	0.0878816	4.65012	3.31734e-06	0.00059885
13717	Eln	elastin	ENSMUSG00000029675	522.296	0.430518	0.0925584	4.65131	3.29838e-06	0.00059885
74012	Rap2b	RAP2B, member of RAS oncogene family	ENSMUSG00000036894	3257.23	-0.309808	0.0668662	-4.63325	3.59969e-06	0.000640795
18611	Pea15a	phosphoprotein enriched in astrocytes 15A	ENSMUSG00000013698	10765.3	0.302635	0.0657386	4.60361	4.15225e-06	0.000707307
232174	Cyp26b1	cytochrome P450, family 26, subfamily b, polypeptide 1	ENSMUSG00000063415	1271.79	-0.377532	0.0819311	-4.60792	4.06715e-06	0.000707307
93688	Klhl1	kelch-like 1	ENSMUSG00000022076	85.5654	0.483807	0.105062	4.60498	4.12499e-06	0.000707307
27367	Rpl3	ribosomal protein L3	ENSMUSG00000060036	6166.58	0.326742	0.0710072	4.60153	4.19406e-06	0.000707307
11303	Abca1	ATP-binding cassette, sub-family A (ABC1), member 1	ENSMUSG00000015243	216.746	0.480908	0.1046	4.5976	4.2739e-06	0.000711411
14812	Grin2b	glutamate receptor, ionotropic, NMDA2B (epsilon 2)	ENSMUSG00000030209	19304.4	-0.376915	0.0828367	-4.55009	5.36226e-06	0.00088113
241514	Zfp804a	zinc finger protein 804A	ENSMUSG00000070866	1002.05	-0.400366	0.0884872	-4.52457	6.05197e-06	0.000981044
72693	Zcchc12	zinc finger, CCHC domain containing 12	ENSMUSG00000036699	792.272	0.396352	0.0876481	4.52208	6.12339e-06	0.000981044
72978	Cnih3	cornichon family AMPA receptor auxiliary protein 3	ENSMUSG00000026514	1783.13	-0.354756	0.0788245	-4.50059	6.77667e-06	0.00106338
11744	Anxa11	annexin A11	ENSMUSG00000021866	1209.69	-0.407222	0.0904988	-4.49975	6.80326e-06	0.00106338
72585	Lypd1	Ly6/Plaur domain containing 1	ENSMUSG00000026344	4175.05	-0.321735	0.0717756	-4.48251	7.37702e-06	0.00112913
216505	Pik3ip1	phosphoinositide-3-kinase interacting protein 1	ENSMUSG00000034614	626.237	0.448908	0.100161	4.48184	7.40009e-06	0.00112913
104582	Rprml	reprimo-like	ENSMUSG00000046215	3874.09	-0.305106	0.0683931	-4.46107	8.15525e-06	0.00122972
66425	Pcp4l1	Purkinje cell protein 4-like 1	ENSMUSG00000038370	238.277	-0.470017	0.105488	-4.45564	8.36422e-06	0.00124656
73340	Nptxr	neuronal pentraxin receptor	ENSMUSG00000022421	88450.3	0.267584	0.0603634	4.43289	9.2979e-06	0.00136978
20501	Slc16a1	solute carrier family 16 (monocarboxylic acid transporters), member 1	ENSMUSG00000032902	1101.36	0.370173	0.0836624	4.4246	9.6621e-06	0.00140726
15564	Htr5b	5-hydroxytryptamine (serotonin) receptor 5B	ENSMUSG00000050534	315.069	-0.461843	0.105254	-4.38789	1.14458e-05	0.00164832
16782	Lamc2	laminin, gamma 2	ENSMUSG00000026479	214.507	0.469796	0.107187	4.38295	1.17085e-05	0.00166742
217944	Rapgef5	Rap guanine nucleotide exchange factor (GEF) 5	ENSMUSG00000041992	5535.03	-0.330872	0.0756333	-4.37468	1.21609e-05	0.00171281
16499	Kcnab3	potassium voltage-gated channel, shaker-related subfamily, beta member 3	ENSMUSG00000018470	347.897	-0.430892	0.0988981	-4.35693	1.31897e-05	0.00181776
98170	Tmem132a	transmembrane protein 132A	ENSMUSG00000024736	14662.6	0.285669	0.0655449	4.35837	1.31034e-05	0.00181776
71685	Galnt14	polypeptide N-acetylgalactosaminyltransferase 14	ENSMUSG00000024064	828.083	0.36593	0.0840748	4.35243	1.34637e-05	0.00183579
140743	Rem2	rad and gem related GTP binding protein 2	ENSMUSG00000022176	1738.95	0.330714	0.0764877	4.32376	1.53392e-05	0.0020695
14735	Gpc4	glypican 4	ENSMUSG00000031119	868.48	-0.376262	0.0872324	-4.31333	1.60815e-05	0.00214704
109050	Fam212b	family with sequence similarity 212, member B	ENSMUSG00000048458	3968.03	-0.292012	0.0678584	-4.30326	1.68303e-05	0.00222385
19736	Rgs4	regulator of G-protein signaling 4	ENSMUSG00000038530	11400.1	0.27916	0.0649097	4.30074	1.70229e-05	0.00222635
51791	Rgs14	regulator of G-protein signaling 14	ENSMUSG00000052087	4262.23	-0.29143	0.0679992	-4.28579	1.82095e-05	0.00235749
67516	Kctd4	potassium channel tetramerisation domain containing 4	ENSMUSG00000046523	2216.56	0.331106	0.0778703	4.25202	2.11855e-05	0.00271535
26558	Homer3	homer scaffolding protein 3	ENSMUSG00000003573	3196.03	0.303388	0.0713899	4.24973	2.14025e-05	0.002716
21834	Thrb	thyroid hormone receptor beta	ENSMUSG00000021779	776.178	-0.382764	0.0901221	-4.24718	2.16482e-05	0.00272025
234577	Cpne2	copine II	ENSMUSG00000034361	1964.18	0.314978	0.0742628	4.24139	2.22138e-05	0.00273763
NA	9930014A18RIK	RIKEN cDNA 9930014A18 gene	ENSMUSG00000097493	125.463	-0.457375	0.107794	-4.24305	2.20499e-05	0.00273763
104418	Dgkz	diacylglycerol kinase zeta	ENSMUSG00000040479	19684.8	-0.286907	0.0681208	-4.21173	2.53418e-05	0.00309338
21885	Tle1	transducin-like enhancer of split 1	ENSMUSG00000008305	1541.21	-0.316482	0.0751962	-4.20875	2.5679e-05	0.00310498
105246	Brd9	bromodomain containing 9	ENSMUSG00000057649	2441.21	-0.29364	0.0699924	-4.19531	2.72494e-05	0.00325505
20524	Slc25a17	solute carrier family 25 (mitochondrial carrier, peroxisomal membrane protein), member 17	ENSMUSG00000022404	716.545	0.368903	0.0879632	4.19383	2.7428e-05	0.00325505
83669	Wdr6	WD repeat domain 6	ENSMUSG00000066357	9490.76	0.309214	0.0740983	4.17302	3.00591e-05	0.00353456
18526	Pcdh10	protocadherin 10	ENSMUSG00000049100	2771.16	-0.299723	0.0718986	-4.1687	3.06346e-05	0.00356949
56349	Net1	neuroepithelial cell transforming gene 1	ENSMUSG00000021215	539.41	-0.413352	0.100097	-4.12954	3.63496e-05	0.00419723
224090	Tmem44	transmembrane protein 44	ENSMUSG00000022537	707.277	-0.371908	0.0904312	-4.11261	3.91214e-05	0.00447696
216795	Wnt9a	wingless-type MMTV integration site family, member 9A	ENSMUSG00000000126	231.69	-0.431788	0.105459	-4.09439	4.23288e-05	0.00480114
235542	Ppp2r3a	protein phosphatase 2, regulatory subunit B'', alpha	ENSMUSG00000043154	685.599	0.349973	0.0858209	4.07795	4.54351e-05	0.00510826
382571	Kcnf1	potassium voltage-gated channel, subfamily F, member 1	ENSMUSG00000051726	3580.5	-0.270643	0.066418	-4.07484	4.60459e-05	0.00513192
101056001	A830036E02Rik	RIKEN cDNA A830036E02 gene	ENSMUSG00000084890	248.313	-0.431951	0.106155	-4.06905	4.72048e-05	0.00521573
238323	Rps6kl1	ribosomal protein S6 kinase-like 1	ENSMUSG00000019235	2643.28	0.293795	0.0724994	4.05237	5.07011e-05	0.00555416
11853	Rhoc	ras homolog family member C	ENSMUSG00000002233	40.4444	0.379135	0.093615	4.04993	5.1232e-05	0.00556476
18111	Nnat	neuronatin	ENSMUSG00000067786	23728.3	0.32471	0.0802788	4.04478	5.23721e-05	0.00564079
12633	Cflar	CASP8 and FADD-like apoptosis regulator	ENSMUSG00000026031	313.178	0.406083	0.100656	4.03437	5.475e-05	0.00584709
170738	Kcnh7	potassium voltage-gated channel, subfamily H (eag-related), member 7	ENSMUSG00000059742	1279.55	-0.336135	0.0833578	-4.03244	5.52e-05	0.00584709
76459	Car12	carbonic anhydrase 12	ENSMUSG00000032373	1666.58	0.314317	0.0785765	4.00014	6.33056e-05	0.00665072
269389	Tox2	TOX high mobility group box family member 2	ENSMUSG00000074607	860.618	-0.332177	0.0831135	-3.99667	6.42396e-05	0.00666696
75985	Rab30	RAB30, member RAS oncogene family	ENSMUSG00000030643	922.751	0.333582	0.0834851	3.99571	6.45005e-05	0.00666696
17919	Myo5b	myosin VB	ENSMUSG00000025885	6765.95	0.280806	0.0704709	3.98471	6.75636e-05	0.0069277
213436	Rtl3	retrotransposon Gag like 3	ENSMUSG00000047686	99.4691	-0.421604	0.106313	-3.96568	7.31874e-05	0.00744479	zcchc5
74718	Snx16	sorting nexin 16	ENSMUSG00000027534	897.396	0.353372	0.0894226	3.95171	7.75963e-05	0.00776994
231605	Galnt9	polypeptide N-acetylgalactosaminyltransferase 9	ENSMUSG00000033316	6216.29	-0.261712	0.0662036	-3.95314	7.71313e-05	0.00776994
23965	Tenm3	teneurin transmembrane protein 3	ENSMUSG00000031561	2768.32	-0.353921	0.0896171	-3.94926	7.8394e-05	0.00778896
81703	Jdp2	Jun dimerization protein 2	ENSMUSG00000034271	891.109	-0.33477	0.0848225	-3.94672	7.92304e-05	0.00781151
14200	Fhl2	four and a half LIM domains 2	ENSMUSG00000008136	1293.87	-0.303084	0.0768713	-3.94275	8.05527e-05	0.00788126
74211	1700017B05Rik	RIKEN cDNA 1700017B05 gene	ENSMUSG00000032300	1102.46	0.359578	0.0912615	3.94009	8.1452e-05	0.00790832	C15orf39
13196	Asap1	ArfGAP with SH3 domain, ankyrin repeat and PH domain1	ENSMUSG00000022377	3706.96	-0.337928	0.0858058	-3.93829	8.20634e-05	0.00790832
320046	F730043M19Rik	RIKEN cDNA F730043M19 gene	ENSMUSG00000052125	843.849	-0.335413	0.0852936	-3.93246	8.40823e-05	0.00804241
15444	Hpca	hippocalcin	ENSMUSG00000028785	70748.3	-0.245104	0.0624009	-3.92789	8.56954e-05	0.00804367
108151	Sema3d	sema domain, immunoglobulin domain (Ig), short basic domain, secreted, (semaphorin) 3D	ENSMUSG00000040254	166.956	0.42213	0.107473	3.92778	8.57342e-05	0.00804367
105244162	Gm39822	predicted gene, 39822	ENSMUSG00000110618	124.841	-0.423296	0.107789	-3.92709	8.59783e-05	0.00804367
56695	Pnkd	paroxysmal nonkinesiogenic dyskinesia	ENSMUSG00000026179	6310.64	-0.255354	0.0655367	-3.89636	9.76506e-05	0.00906947
15118	Has3	hyaluronan synthase 3	ENSMUSG00000031910	207.74	-0.409186	0.105098	-3.89339	9.88515e-05	0.00909689
15551	Htr1b	5-hydroxytryptamine (serotonin) receptor 1B	ENSMUSG00000049511	397.429	-0.371174	0.095365	-3.89214	9.93652e-05	0.00909689
72003	Synpr	synaptoporin	ENSMUSG00000056296	2717.91	0.32757	0.0842145	3.8897	0.000100367	0.00912342
13198	Ddit3	DNA-damage inducible transcript 3	ENSMUSG00000025408	232.456	0.410614	0.10563	3.88729	0.000101371	0.0091423
26559	Hunk	hormonally upregulated Neu-associated kinase	ENSMUSG00000053414	1130.34	-0.329559	0.0848114	-3.88578	0.000102001	0.0091423
218454	Lhfpl2	lipoma HMGIC fusion partner-like 2	ENSMUSG00000045312	880.449	0.330714	0.0853461	3.87497	0.000106637	0.00942601
74199	Vit	vitrin	ENSMUSG00000024076	377.407	-0.375909	0.0969971	-3.87547	0.000106421	0.00942601
108699	Chn1	chimerin 1	ENSMUSG00000056486	42986.8	-0.258421	0.0668247	-3.86715	0.000110114	0.00960088
193740	Hspa1a	heat shock protein 1A	ENSMUSG00000091971	482.79	0.370564	0.0957992	3.86814	0.00010967	0.00960088
233651	Dchs1	dachsous cadherin related 1	ENSMUSG00000036862	405.42	0.391131	0.10127	3.86226	0.000112342	0.009729
15114	Hap1	huntingtin-associated protein 1	ENSMUSG00000006930	5061.58	0.272212	0.0705416	3.85888	0.000113908	0.00979837
18767	Pkia	protein kinase inhibitor, alpha	ENSMUSG00000027499	4779.87	0.303666	0.0788276	3.85227	0.000117026	0.00999945
67468	Mmd	monocyte to macrophage differentiation-associated	ENSMUSG00000003948	10884	0.286919	0.0747748	3.83711	0.000124488	0.0105667
64580	Ndst4	N-deacetylase/N-sulfotransferase (heparin glucosaminyl) 4	ENSMUSG00000027971	687.859	-0.328183	0.0857474	-3.82733	0.000129543	0.0108519
21338	Tacr3	tachykinin receptor 3	ENSMUSG00000028172	175.639	0.407161	0.106361	3.82811	0.000129129	0.0108519
21912	Tspan7	tetraspanin 7	ENSMUSG00000058254	23152	0.237886	0.062325	3.81686	0.000135161	0.0112491
213006	Mfsd4a	major facilitator superfamily domain containing 4A	ENSMUSG00000059149	1422.43	-0.310172	0.0815454	-3.80367	0.000142568	0.011789	mfsd4
74186	Ccdc3	coiled-coil domain containing 3	ENSMUSG00000026676	709.65	-0.350881	0.0923899	-3.79783	0.00014597	0.0119165
242594	Fyb2	FYN binding protein 2	ENSMUSG00000078612	163.562	-0.408001	0.107408	-3.79861	0.000145509	0.0119165	1700024P16Rik
71436	Flrt3	fibronectin leucine rich transmembrane protein 3	ENSMUSG00000051379	1378.85	0.307155	0.0809767	3.79312	0.000148764	0.0120678
106393	Srl	sarcalumenin	ENSMUSG00000022519	697.973	-0.356856	0.0942025	-3.78818	0.000151753	0.0122328
215378	Brinp3	bone morphogenetic protein/retinoic acid inducible neural specific 3	ENSMUSG00000035131	402.906	-0.386721	0.102186	-3.78447	0.000154035	0.0122963
99296	Hrh3	histamine receptor H3	ENSMUSG00000039059	1701.75	-0.307098	0.0811616	-3.78379	0.00015446	0.0122963
NA	A730060N03Rik	RIKEN cDNA A730060N03 gene	ENSMUSG00000092375	83.7471	-0.401001	0.106075	-3.78037	0.000156599	0.0123896
18753	Prkcd	protein kinase C, delta	ENSMUSG00000021948	1381.35	-0.328189	0.0872363	-3.76208	0.000168509	0.0131694
74411	Plpp6	phospholipid phosphatase 6	ENSMUSG00000040105	2331.96	-0.282875	0.0751805	-3.76261	0.000168148	0.0131694	ppapdc2
13134	Dach1	dachshund family transcription factor 1	ENSMUSG00000055639	66.6264	-0.383393	0.102318	-3.74706	0.00017892	0.0138983
76820	Fam49a	family with sequence similarity 49, member A	ENSMUSG00000020589	8846.14	-0.247276	0.0661258	-3.73947	0.000184407	0.0142383
72747	Ttc39c	tetratricopeptide repeat domain 39C	ENSMUSG00000024424	1077.61	0.294598	0.078906	3.73353	0.000188813	0.0144912
53376	Usp2	ubiquitin specific peptidase 2	ENSMUSG00000032010	1785.01	-0.311881	0.0836489	-3.72845	0.000192661	0.0146114
67295	Rab3c	RAB3C, member RAS oncogene family	ENSMUSG00000021700	17012	-0.26391	0.0707675	-3.72925	0.000192051	0.0146114
58208	Bcl11b	B cell leukemia/lymphoma 11B	ENSMUSG00000048251	5513.07	-0.269756	0.0725392	-3.71876	0.000200203	0.0150059
11838	Arc	activity regulated cytoskeletal-associated protein	ENSMUSG00000022602	7588.09	-0.245781	0.0660795	-3.71948	0.000199634	0.0150059
14828	Hspa5	heat shock protein 5	ENSMUSG00000026864	12487.3	0.225546	0.0608428	3.70703	0.000209707	0.0156268
78929	Polr3h	polymerase (RNA) III (DNA directed) polypeptide H	ENSMUSG00000022476	789.195	-0.321866	0.0869588	-3.70136	0.000214448	0.0158877
54376	Cacng3	calcium channel, voltage-dependent, gamma subunit 3	ENSMUSG00000066189	1840.62	-0.318902	0.0862107	-3.6991	0.000216369	0.0159379
244954	Prss35	protease, serine 35	ENSMUSG00000033491	770.952	0.324176	0.0876902	3.69683	0.000218311	0.0159891
109205	Sobp	sine oculis binding protein	ENSMUSG00000038248	5188.92	-0.292599	0.0794261	-3.68391	0.000229683	0.0167264
330450	Far2	fatty acyl CoA reductase 2	ENSMUSG00000030303	692.692	-0.324618	0.0885562	-3.66568	0.000246686	0.0178631
NA	4921539H07Rik	RIKEN cDNA 4921539H07 gene	ENSMUSG00000104586	236.635	-0.381003	0.104125	-3.6591	0.000253101	0.0180527
56433	Vps29	VPS29 retromer complex component	ENSMUSG00000029462	3486.77	-0.243607	0.0665835	-3.65867	0.000253529	0.0180527
320405	Cadps2	Ca2+-dependent activator protein for secretion 2	ENSMUSG00000017978	3992.45	-0.244627	0.0668255	-3.66068	0.000251543	0.0180527
16480	Jup	junction plakoglobin	ENSMUSG00000001552	1445.74	0.28886	0.0790272	3.6552	0.000256981	0.0181973
102141	Snx25	sorting nexin 25	ENSMUSG00000038291	1529.77	-0.274528	0.0753123	-3.6452	0.000267187	0.0188161
18563	Pcx	pyruvate carboxylase	ENSMUSG00000024892	1528.49	-0.320449	0.0879786	-3.64234	0.000270166	0.018922
55963	Slc1a4	solute carrier family 1 (glutamate/neutral amino acid transporter), member 4	ENSMUSG00000020142	1831.41	0.276209	0.0759407	3.63717	0.000275654	0.0192014
18993	Pou3f3	POU domain, class 3, transcription factor 3	ENSMUSG00000045515	2111.89	-0.275081	0.0756607	-3.63572	0.000277202	0.0192048
228012	Tlk1	tousled-like kinase 1	ENSMUSG00000041997	2740.58	-0.283228	0.0779541	-3.63327	0.000279851	0.0192842
12798	Cnn2	calponin 2	ENSMUSG00000004665	98.7013	-0.375217	0.103349	-3.63058	0.000282783	0.019382
18164	Nptx1	neuronal pentraxin 1	ENSMUSG00000025582	27437.3	0.240476	0.0663637	3.62361	0.000290514	0.019806
13730	Emp1	epithelial membrane protein 1	ENSMUSG00000030208	33.271	-0.308155	0.0851202	-3.62024	0.000294334	0.0199602
73047	Camk2n2	calcium/calmodulin-dependent protein kinase II inhibitor 2	ENSMUSG00000051146	2396.69	0.336563	0.0930506	3.61698	0.000298055	0.0201061
228942	Cbln4	cerebellin 4 precursor protein	ENSMUSG00000067578	197.173	-0.389575	0.107788	-3.61427	0.0003012	0.0201067
103551	Epop	elongin BC and polycomb repressive complex 2 associated protein	ENSMUSG00000043439	891.068	-0.325704	0.0900942	-3.61515	0.000300178	0.0201067	E130012A19Rik
12476	Cd151	CD151 antigen	ENSMUSG00000025510	189.093	0.383647	0.106423	3.60491	0.000312262	0.0207371
81905	Cacng8	calcium channel, voltage-dependent, gamma subunit 8	ENSMUSG00000053395	7950.8	-0.270614	0.0750999	-3.60339	0.000314092	0.0207511
68497	Arel1	apoptosis resistant E3 ubiquitin protein ligase 1	ENSMUSG00000042350	6013.71	-0.263336	0.0732515	-3.59496	0.000324448	0.0213254
22339	Vegfa	vascular endothelial growth factor A	ENSMUSG00000023951	529.927	0.326816	0.090955	3.59316	0.000326693	0.0213634
67145	Tomm34	translocase of outer mitochondrial membrane 34	ENSMUSG00000018322	3000.25	-0.242291	0.0676683	-3.58058	0.000342839	0.0222187
18160	Npr1	natriuretic peptide receptor 1	ENSMUSG00000027931	95.0395	0.381324	0.106546	3.57895	0.000344973	0.0222187
320495	Ipcef1	interaction protein for cytohesin exchange factors 1	ENSMUSG00000064065	1065.66	-0.340886	0.0952149	-3.58018	0.000343362	0.0222187
213262	Fstl5	follistatin-like 5	ENSMUSG00000034098	1745.32	0.27668	0.077536	3.56841	0.000359148	0.0227881
67220	Plekho1	pleckstrin homology domain containing, family O member 1	ENSMUSG00000015745	360.879	-0.351286	0.098438	-3.5686	0.000358889	0.0227881
14166	Fgf11	fibroblast growth factor 11	ENSMUSG00000042826	828.798	-0.296889	0.0831648	-3.56988	0.000357139	0.0227881
230085	Phf24	PHD finger protein 24	ENSMUSG00000036062	6348.79	-0.259935	0.0729585	-3.56277	0.000366955	0.0231688
114128	Laptm4b	lysosomal-associated protein transmembrane 4B	ENSMUSG00000022257	967.893	0.287377	0.0809458	3.55025	0.000384872	0.0241809
12832	Col5a2	collagen, type V, alpha 2	ENSMUSG00000026042	69.0177	0.357306	0.101045	3.53611	0.000406069	0.0252098
67603	Dusp6	dual specificity phosphatase 6	ENSMUSG00000019960	2843.51	-0.291864	0.0825546	-3.53541	0.000407148	0.0252098
14608	Gpr83	G protein-coupled receptor 83	ENSMUSG00000031932	489.097	0.334412	0.0945752	3.53594	0.000406333	0.0252098
22413	Wnt2	wingless-type MMTV integration site family, member 2	ENSMUSG00000010797	245.549	-0.36383	0.103281	-3.52272	0.000427135	0.0263202
74901	Kbtbd11	kelch repeat and BTB (POZ) domain containing 11	ENSMUSG00000055675	7284.98	-0.295084	0.0839975	-3.513	0.00044307	0.0271715
99633	Adgrl2	adhesion G protein-coupled receptor L2	ENSMUSG00000028184	1370.32	-0.280123	0.0801026	-3.49705	0.000470435	0.0285141	lphn2
23967	Osr1	odd-skipped related transcription factor 1	ENSMUSG00000048387	234.272	0.368095	0.105252	3.49726	0.000470061	0.0285141
69480	Ttc9	tetratricopeptide repeat domain 9	ENSMUSG00000042734	1254.58	-0.291098	0.0832572	-3.49637	0.000471639	0.0285141
12778	Ackr3	atypical chemokine receptor 3	ENSMUSG00000044337	376.758	0.350039	0.100184	3.49396	0.000475918	0.0285664
15519	Hsp90aa1	heat shock protein 90, alpha (cytosolic), class A member 1	ENSMUSG00000021270	38716	0.220116	0.0630096	3.49337	0.00047696	0.0285664
245386	Tmem255a	transmembrane protein 255A	ENSMUSG00000036502	554.068	0.348894	0.100137	3.48418	0.000493642	0.0294279
223626	Them6	thioesterase superfamily member 6	ENSMUSG00000056665	1225.91	-0.280174	0.0804912	-3.4808	0.000499916	0.029664
12576	Cdkn1b	cyclin-dependent kinase inhibitor 1B	ENSMUSG00000003031	1417.82	0.274814	0.0790391	3.47693	0.000507181	0.0299564
12354	Car7	carbonic anhydrase 7	ENSMUSG00000031883	497.34	-0.324841	0.0934613	-3.47567	0.000509585	0.0299603
18143	Npas2	neuronal PAS domain protein 2	ENSMUSG00000026077	818.169	-0.326195	0.0939385	-3.47243	0.000515773	0.0301857
NA	NA	NA	ENSMUSG00000091421	280.515	-0.369922	0.106638	-3.46895	0.000522495	0.0304255	Gm4202
170770	Bbc3	BCL2 binding component 3	ENSMUSG00000002083	523.905	0.34019	0.0980979	3.46786	0.000524619	0.0304255
384061	Fndc5	fibronectin type III domain containing 5	ENSMUSG00000001334	2337.75	-0.243396	0.0702431	-3.46505	0.000530128	0.0305183
70584	Pak4	p21 protein (Cdc42/Rac)-activated kinase 4	ENSMUSG00000030602	211.261	0.362857	0.104732	3.46462	0.000530982	0.0305183
225288	Fhod3	formin homology 2 domain containing 3	ENSMUSG00000034295	503.503	-0.347435	0.100396	-3.46064	0.00053889	0.0308346
74480	Samd4	sterile alpha motif domain containing 4	ENSMUSG00000021838	386.209	0.350237	0.101355	3.45554	0.0005492	0.0312849
69952	Tunar	Tcl1 upstream neural differentiation associated RNA	ENSMUSG00000097929	854.603	-0.306643	0.0888028	-3.45308	0.000554228	0.0314316
330941	AI593442	expressed sequence AI593442	ENSMUSG00000078307	3665.41	-0.238534	0.0693242	-3.44085	0.000579886	0.0327419
20449	St8sia1	ST8 alpha-N-acetyl-neuraminide alpha-2,8-sialyltransferase 1	ENSMUSG00000030283	1697.71	-0.264631	0.0770992	-3.43235	0.000598383	0.0335886
74747	Ddit4	DNA-damage-inducible transcript 4	ENSMUSG00000020108	2496.78	0.241854	0.0704793	3.43156	0.000600124	0.0335886
66152	Uqcr10	ubiquinol-cytochrome c reductase, complex III subunit X	ENSMUSG00000059534	1765.17	-0.257184	0.0751292	-3.42322	0.000618847	0.0344482
67434	Ankrd33b	ankyrin repeat domain 33B	ENSMUSG00000022237	1592.2	-0.286235	0.0836373	-3.42234	0.000620857	0.0344482
50875	Tmod3	tropomodulin 3	ENSMUSG00000058587	932.898	0.34228	0.100076	3.42022	0.000625711	0.0345678
242083	Ppm1l	protein phosphatase 1 (formerly 2C)-like	ENSMUSG00000027784	4138.76	-0.239588	0.0700979	-3.41791	0.000631034	0.0347123
100502846	Gm19410	predicted gene, 19410	ENSMUSG00000109372	1098.46	0.301957	0.0887424	3.40262	0.000667432	0.0365048
13653	Egr1	early growth response 1	ENSMUSG00000038418	9517.64	-0.223076	0.065575	-3.40185	0.000669316	0.0365048
66895	Pxdc1	PX domain containing 1	ENSMUSG00000021411	214.609	0.36159	0.106823	3.38494	0.000711938	0.0385017
240185	Jcad	junctional cadherin 5 associated	ENSMUSG00000033960	1714.9	-0.296504	0.0875873	-3.38524	0.000711169	0.0385017
19731	Rgl1	ral guanine nucleotide dissociation stimulator,-like 1	ENSMUSG00000026482	3925.3	-0.24697	0.073049	-3.38088	0.000722541	0.0389109
11600	Angpt1	angiopoietin 1	ENSMUSG00000022309	98.677	-0.356765	0.10594	-3.36763	0.000758183	0.0406596
20265	Scn1a	sodium channel, voltage-gated, type I, alpha	ENSMUSG00000064329	1348.19	-0.280928	0.083547	-3.36251	0.000772368	0.0412477
81006	Gpr63	G protein-coupled receptor 63	ENSMUSG00000040372	334.691	-0.349699	0.104213	-3.35562	0.000791881	0.0418352
330319	Wipf3	WAS/WASL interacting protein family, member 3	ENSMUSG00000086040	30685.9	-0.274262	0.0817432	-3.35517	0.000793163	0.0418352
108800	Ston2	stonin 2	ENSMUSG00000020961	275.191	0.349408	0.104085	3.35694	0.000788115	0.0418352
214058	Megf11	multiple EGF-like-domains 11	ENSMUSG00000036466	755.044	0.294431	0.0880223	3.34496	0.000822936	0.0432277
73707	Gucy2g	guanylate cyclase 2g	ENSMUSG00000055523	110.022	-0.356051	0.106516	-3.3427	0.00082969	0.0434046
212531	Sh3bgrl2	SH3 domain binding glutamic acid-rich protein like 2	ENSMUSG00000032261	813.154	-0.288633	0.0864451	-3.33892	0.000841049	0.04382
211586	Tfdp2	transcription factor Dp 2	ENSMUSG00000032411	722.085	-0.29465	0.0882979	-3.33701	0.000846863	0.0439443
12822	Col18a1	collagen, type XVIII, alpha 1	ENSMUSG00000001435	80.8724	0.35075	0.105207	3.33392	0.000856308	0.0442552
12570	Cdk5r2	cyclin-dependent kinase 5, regulatory subunit 2 (p39)	ENSMUSG00000090071	14862.2	-0.291685	0.0875311	-3.33236	0.000861138	0.0443262
67017	Fam210b	family with sequence similarity 210, member B	ENSMUSG00000027495	985.197	-0.274877	0.0827271	-3.32269	0.000891525	0.0456454
19276	Ptprn2	protein tyrosine phosphatase, receptor type, N polypeptide 2	ENSMUSG00000056553	11237.7	-0.26337	0.0792816	-3.32196	0.00089389	0.0456454
58235	Nectin1	nectin cell adhesion molecule 1	ENSMUSG00000032012	4676.29	0.239663	0.0721734	3.32065	0.000898074	0.045677	pvrl1
57436	Gabarapl1	gamma-aminobutyric acid (GABA) A receptor-associated protein-like 1	ENSMUSG00000030161	15760.3	-0.222305	0.0672126	-3.30749	0.000941361	0.0476894
244810	AW551984	expressed sequence AW551984	ENSMUSG00000038112	228.425	0.342669	0.103696	3.30456	0.000951244	0.0480004
68729	Trim37	tripartite motif-containing 37	ENSMUSG00000018548	12294.1	-0.235271	0.0712537	-3.30188	0.000960378	0.0480827
12609	Cebpd	CCAAT/enhancer binding protein (C/EBP), delta	ENSMUSG00000071637	402.591	-0.321898	0.0974751	-3.30236	0.000958749	0.0480827
14137	Fdft1	farnesyl diphosphate farnesyl transferase 1	ENSMUSG00000021273	2356.11	-0.255373	0.0774781	-3.29607	0.000980474	0.0488245
16777	Lamb1	laminin B1	ENSMUSG00000002900	1553.88	0.267743	0.0812474	3.2954	0.000982813	0.0488245
19894	Rph3a	rabphilin 3A	ENSMUSG00000029608	13323.9	-0.284045	0.0862519	-3.2932	0.000990535	0.0490181
66274	Lyrm9	LYR motif containing 9	ENSMUSG00000072640	798.319	-0.28651	0.087109	-3.28909	0.0010051	0.0495477

## Sheet: Region specific expression
No region differences		CA1 enriched		CA3 enriched		DG enriched		CA1 and CA3 enriched		CA1 and DG enriched		CA3 and DG enriched		Not clear or No		Most expressed elsewhere in hippocampus		Note: if 2 regions show different expression levels but are two levels above third region, considered as both enriched. If only one, (ie, a 3, a 2, a 1, considered as 3 enriched). Most expressed elsewhere in hippocampus used when the strongest expression is found in another region/cell type, and other descriptions don't explain where most of the signal is.
Map3k12	ENSMUSG00000023050	Stmn4	ENSMUSG00000022044	Sh2d3c	ENSMUSG00000059013	Hrk	ENSMUSG00000046607	Klc3	ENSMUSG00000040714	Pik3r1	ENSMUSG00000041417	Cxadr	ENSMUSG00000022865	Gm19410	ENSMUSG00000109372	Gfap	ENSMUSG00000020932	Green is upregulated, red is downregulated
Jun	ENSMUSG00000052684	Ccnd1	ENSMUSG00000070348	Pdlim1	ENSMUSG00000055044	Slc44a5	ENSMUSG00000028360	Car4	ENSMUSG00000000805	Lamc2	ENSMUSG00000026479	Tgfb2	ENSMUSG00000039239	Rpl3-ps1	ENSMUSG00000084349	Rgs4	ENSMUSG00000038530
Dusp16	ENSMUSG00000030203	Slc16a1	ENSMUSG00000032902	Ccnd2	ENSMUSG00000000184	Col6a1	ENSMUSG00000001119	Gpr137c	ENSMUSG00000049092	Cpne2	ENSMUSG00000034361	Smoc2	ENSMUSG00000023886	Gm34583	ENSMUSG00000107272	Tacr3	ENSMUSG00000028172
Loxl1	ENSMUSG00000032334	Igfbp4	ENSMUSG00000017493	Ak4	ENSMUSG00000028527	Pcdh8	ENSMUSG00000036422	Rem2	ENSMUSG00000022176	Tmem255a	ENSMUSG00000036502	Galnt14	ENSMUSG00000024064	Gm39822	ENSMUSG00000110618	Vit	ENSMUSG00000024076
Bdkrb2	ENSMUSG00000021070	Lamp5	ENSMUSG00000027270	Adamts8	ENSMUSG00000031994	Pik3ip1	ENSMUSG00000034614	Myo5b	ENSMUSG00000025885	C1qtnf4	ENSMUSG00000040794	Kctd4	ENSMUSG00000046523	Gm4202	ENSMUSG00000091421	Fyb2	ENSMUSG00000078612
Arid5a	ENSMUSG00000037447	Ctxnd1	ENSMUSG00000097789	Homer3	ENSMUSG00000003573	Car12	ENSMUSG00000032373	1700017B05Rik	ENSMUSG00000032300	Itpka	ENSMUSG00000027296	Ppp2r3a	ENSMUSG00000043154			Srl	ENSMUSG00000022519
Plat	ENSMUSG00000031538	Pantr1	ENSMUSG00000060424	Rps6kl1	ENSMUSG00000019235	Lhfpl2	ENSMUSG00000045312	Ddit3	ENSMUSG00000025408	Fam84a	ENSMUSG00000020607	Nnat	ENSMUSG00000067786			Fhod3	ENSMUSG00000034295
Calb2	ENSMUSG00000003657	Cds1	ENSMUSG00000029330	Flrt3	ENSMUSG00000051379	Hap1	ENSMUSG00000006930	Hspa5	ENSMUSG00000026864	Doc2b	ENSMUSG00000020848	Synpr	ENSMUSG00000056296
Smtnl2	ENSMUSG00000045667	Scn4b	ENSMUSG00000046480	Prss35	ENSMUSG00000033491	Pkia	ENSMUSG00000027499	Laptm4b	ENSMUSG00000022257	Rapgef5	ENSMUSG00000041992	Ttc39c	ENSMUSG00000024424
Pik3r3	ENSMUSG00000028698	Fibcd1	ENSMUSG00000026841	Npr1	ENSMUSG00000027931	Pxdc1	ENSMUSG00000021411	Hsp90aa1	ENSMUSG00000021270	9930014A18RIK	ENSMUSG00000097493	Jup	ENSMUSG00000001552
Casp3	ENSMUSG00000031628	Arhgap12	ENSMUSG00000041225	Fstl5	ENSMUSG00000034098	Ston2	ENSMUSG00000020961	Bbc3	ENSMUSG00000002083	Tle1	ENSMUSG00000008305	Ackr3	ENSMUSG00000044337
Gabra2	ENSMUSG00000000560	Lefty1	ENSMUSG00000038793	Gpr83	ENSMUSG00000031932	Mef2c	ENSMUSG00000005583	Rap2b	ENSMUSG00000036894	Dach1	ENSMUSG00000055639	Anxa11	ENSMUSG00000021866
Mcam	ENSMUSG00000032135	Ankrd63	ENSMUSG00000078137	Osr1	ENSMUSG00000048387	Gpc4	ENSMUSG00000031119	Rprml	ENSMUSG00000046215	Fam49a	ENSMUSG00000020589	Kcnf1	ENSMUSG00000051726
Irf6	ENSMUSG00000026638	Pou3f1	ENSMUSG00000090125	Nectin1	ENSMUSG00000032012	Net1	ENSMUSG00000021215	Dgkz	ENSMUSG00000040479	Bcl11b	ENSMUSG00000048251	Rph3a	ENSMUSG00000029608
Hspa1b	ENSMUSG00000090877	Man1a	ENSMUSG00000003746	Lamb1	ENSMUSG00000002900	A830036E02Rik	ENSMUSG00000084890	Brd9	ENSMUSG00000057649	Snx25	ENSMUSG00000038291
Adgrg1	ENSMUSG00000031785	Mpped1	ENSMUSG00000041708	Cyp26b1	ENSMUSG00000063415	Rtl3	ENSMUSG00000047686	Pcdh10	ENSMUSG00000049100	Pou3f3	ENSMUSG00000045515
Rsrp1	ENSMUSG00000037266	Pex5l	ENSMUSG00000027674	Ccdc3	ENSMUSG00000026676	F730043M19Rik	ENSMUSG00000052125	Fhl2	ENSMUSG00000008136	AI593442	ENSMUSG00000078307
Icosl	ENSMUSG00000000732	Sh3bp4	ENSMUSG00000036206	Prkcd	ENSMUSG00000021948	Ipcef1	ENSMUSG00000064065	Pnkd	ENSMUSG00000026179	Sh3bgrl2	ENSMUSG00000032261
Txnip	ENSMUSG00000038393	Kcnab1	ENSMUSG00000027827	Them6	ENSMUSG00000056665			Rab3c	ENSMUSG00000021700	Cebpd	ENSMUSG00000071637
Clk1	ENSMUSG00000026034	Fam84b	ENSMUSG00000072568	Ppm1l	ENSMUSG00000027784			Arc	ENSMUSG00000022602
Ticam1	ENSMUSG00000047123	Ptn	ENSMUSG00000029838	Fdft1	ENSMUSG00000021273			4921539H07Rik	ENSMUSG00000104586
Sesn2	ENSMUSG00000028893	Plxnd1	ENSMUSG00000030123					Tlk1	ENSMUSG00000041997
Eln	ENSMUSG00000029675	Zfp804a	ENSMUSG00000070866					Cbln4	ENSMUSG00000067578
Pea15a	ENSMUSG00000013698	Lypd1	ENSMUSG00000026344					Arel1	ENSMUSG00000042350
Klhl1	ENSMUSG00000022076	Htr5b	ENSMUSG00000050534					Tomm34	ENSMUSG00000018322
Rpl3	ENSMUSG00000060036	Kcnab3	ENSMUSG00000018470					Fndc5	ENSMUSG00000001334
Abca1	ENSMUSG00000015243	Rgs14	ENSMUSG00000052087					Uqcr10	ENSMUSG00000059534
Zcchc12	ENSMUSG00000036699	Thrb	ENSMUSG00000021779					Egr1	ENSMUSG00000038418
Nptxr	ENSMUSG00000022421	Kcnh7	ENSMUSG00000059742					Rgl1	ENSMUSG00000026482
Tmem132a	ENSMUSG00000024736	Tox2	ENSMUSG00000074607					Cdk5r2	ENSMUSG00000090071
Slc25a17	ENSMUSG00000022404	Galnt9	ENSMUSG00000033316					Ptprn2	ENSMUSG00000056553
Wdr6	ENSMUSG00000066357	Tenm3	ENSMUSG00000031561					Trim37	ENSMUSG00000018548
Rhoc	ENSMUSG00000002233	Asap1	ENSMUSG00000022377
Cflar	ENSMUSG00000026031	Htr1b	ENSMUSG00000049511
Rab30	ENSMUSG00000030643	Hunk	ENSMUSG00000053414
Snx16	ENSMUSG00000027534	Ndst4	ENSMUSG00000027971
Sema3d	ENSMUSG00000040254	Mfsd4a	ENSMUSG00000059149
Hspa1a	ENSMUSG00000091971	Plpp6	ENSMUSG00000040105
Dchs1	ENSMUSG00000036862	Cacng3	ENSMUSG00000066189
Mmd	ENSMUSG00000003948	Far2	ENSMUSG00000030303
Tspan7	ENSMUSG00000058254	Cadps2	ENSMUSG00000017978
Slc1a4	ENSMUSG00000020142	Epop	ENSMUSG00000043439
Nptx1	ENSMUSG00000025582	Fgf11	ENSMUSG00000042826
Camk2n2	ENSMUSG00000051146	Dusp6	ENSMUSG00000019960
Cd151	ENSMUSG00000025510	Wnt2	ENSMUSG00000010797
Vegfa	ENSMUSG00000023951	Adgrl2	ENSMUSG00000028184
Col5a2	ENSMUSG00000026042	Ttc9	ENSMUSG00000042734
Cdkn1b	ENSMUSG00000003031	Car7	ENSMUSG00000031883
Pak4	ENSMUSG00000030602	Npas2	ENSMUSG00000026077
Samd4	ENSMUSG00000021838	St8sia1	ENSMUSG00000030283
Ddit4	ENSMUSG00000020108	Jcad	ENSMUSG00000033960
Tmod3	ENSMUSG00000058587	Gpr63	ENSMUSG00000040372
Megf11	ENSMUSG00000036466	Tfdp2	ENSMUSG00000032411
Col18a1	ENSMUSG00000001435
AW551984	ENSMUSG00000038112
Ddn	ENSMUSG00000059213
Lingo3	ENSMUSG00000051067
Peg13	ENSMUSG00000106847
Grin2b	ENSMUSG00000030209
Cnih3	ENSMUSG00000026514
Pcp4l1	ENSMUSG00000038370
Fam212b	ENSMUSG00000048458
Tmem44	ENSMUSG00000022537
Wnt9a	ENSMUSG00000000126
Jdp2	ENSMUSG00000034271
Hpca	ENSMUSG00000028785
Has3	ENSMUSG00000031910
Chn1	ENSMUSG00000056486
Brinp3	ENSMUSG00000035131
Hrh3	ENSMUSG00000039059
A730060N03Rik	ENSMUSG00000092375
Usp2	ENSMUSG00000032010
Polr3h	ENSMUSG00000022476
Sobp	ENSMUSG00000038248
Vps29	ENSMUSG00000029462
Pcx	ENSMUSG00000024892
Cnn2	ENSMUSG00000004665
Emp1	ENSMUSG00000030208
Cacng8	ENSMUSG00000053395
Plekho1	ENSMUSG00000015745
Phf24	ENSMUSG00000036062
Kbtbd11	ENSMUSG00000055675
Tunar	ENSMUSG00000097929
Ankrd33b	ENSMUSG00000022237
Angpt1	ENSMUSG00000022309
Scn1a	ENSMUSG00000064329
Wipf3	ENSMUSG00000086040
Gucy2g	ENSMUSG00000055523
Fam210b	ENSMUSG00000027495
Gabarapl1	ENSMUSG00000030161
Lyrm9	ENSMUSG00000072640

## Sheet: Upregulated
ENTREZID	SYMBOL	GENENAME	GeneID	Base mean	log2(FC)	StdErr	Wald-Stats	pvalue	padj	Alternative name/Ortholog	Expression patterns based on ABA	CA1	CA3	DG	Other notes
26404	Map3k12	mitogen-activated protein kinase kinase kinase 12	ENSMUSG00000023050	10426.2	1.63653	0.0732556	22.34	1.50993e-110	1.93528e-106		no apparent region differences	3	3	3
16476	Jun	jun proto-oncogene	ENSMUSG00000052684	5743.09	0.694441	0.0640659	10.8395	2.23743e-27	9.55904e-24		no apparent region differences	3	3	3
70686	Dusp16	dual specificity phosphatase 16	ENSMUSG00000030203	265.976	1.02649	0.102801	9.98518	1.76973e-23	5.67066e-20		no apparent region differences	1	1	1	based on Habib et al., 2016/Zeisel et al., 2018
27387	Sh2d3c	SH2 domain containing 3C	ENSMUSG00000059013	1269.54	0.782581	0.0789831	9.90821	3.8345e-23	9.82935e-20		CA3 enriched	1	2	1
56471	Stmn4	stathmin-like 4	ENSMUSG00000022044	12463.9	0.58679	0.0627636	9.3492	8.83115e-21	1.61698e-17		CA1 enriched	3	2	2
16949	Loxl1	lysyl oxidase-like 1	ENSMUSG00000032334	522.182	0.886821	0.0959193	9.2455	2.34146e-20	3.75131e-17		no apparent region differences	1	1	1
12062	Bdkrb2	bradykinin receptor, beta 2	ENSMUSG00000021070	109.688	0.957102	0.105759	9.04986	1.43151e-19	2.03863e-16		no apparent region differences	1	1	1
214855	Arid5a	AT rich interactive domain 5A (MRF1-like)	ENSMUSG00000037447	337.725	0.850101	0.0997778	8.51994	1.59636e-17	2.04606e-14		no apparent region differences	1	1	1
12123	Hrk	harakiri, BCL2 interacting protein (contains only BH3 domain)	ENSMUSG00000046607	3374.89	0.650782	0.0867644	7.50056	6.35446e-14	7.40411e-11		DG enriched	1	1	2
54132	Pdlim1	PDZ and LIM domain 1 (elfin)	ENSMUSG00000055044	418.949	0.743131	0.103021	7.21342	5.45653e-13	4.99545e-10		CA3 enriched	0	1	0
232943	Klc3	kinesin light chain 3	ENSMUSG00000040714	132.3	0.752602	0.10745	7.00423	2.48349e-12	1.98943e-09		CA1 and CA3 enriched	3	3	2
18791	Plat	plasminogen activator, tissue	ENSMUSG00000031538	1246.37	0.574221	0.0823722	6.97105	3.14575e-12	2.37171e-09		no apparent region differences	2	2	2
242259	Slc44a5	solute carrier family 44, member 5	ENSMUSG00000028360	1299.57	0.522832	0.0793758	6.58679	4.49422e-11	3.20014e-08		DG enriched	0	0	1
12351	Car4	carbonic anhydrase 4	ENSMUSG00000000805	1265.92	0.497336	0.0775592	6.41234	1.43305e-10	9.66705e-08		CA1 and CA3 enriched	3	3	2
70713	Gpr137c	G protein-coupled receptor 137C	ENSMUSG00000049092	950.133	0.522828	0.0818105	6.39072	1.65111e-10	1.05811e-07		CA1 and CA3 enriched	3	3	2
12308	Calb2	calbindin 2	ENSMUSG00000003657	2580.09	0.440932	0.0707971	6.22811	4.72091e-10	2.52116e-07	calretinin	no apparent region differences	1	1	1
276829	Smtnl2	smoothelin-like 2	ENSMUSG00000045667	344.943	0.641621	0.103248	6.21436	5.15356e-10	2.64212e-07		no apparent region differences	1	1	1
12444	Ccnd2	cyclin D2	ENSMUSG00000000184	6242.12	0.440411	0.0710467	6.19889	5.68628e-10	2.80311e-07		CA3 enriched	0	3	1
18710	Pik3r3	phosphoinositide-3-kinase regulatory subunit 3	ENSMUSG00000028698	1478.89	0.482688	0.0783069	6.16405	7.09081e-10	3.36604e-07		no apparent region differences	1	1	1
12367	Casp3	caspase 3	ENSMUSG00000031628	431.515	0.620963	0.101142	6.1395	8.27801e-10	3.78926e-07		no apparent region differences	2	2	2
13052	Cxadr	coxsackie virus and adenovirus receptor	ENSMUSG00000022865	1404.55	0.503304	0.0822369	6.12017	9.34729e-10	4.13118e-07		CA3 and DG enriched	1	2	2
21808	Tgfb2	transforming growth factor, beta 2	ENSMUSG00000039239	2636.56	0.474379	0.0779872	6.08278	1.18116e-09	5.04629e-07		CA3 and DG enriched	0	3	2
12443	Ccnd1	cyclin D1	ENSMUSG00000070348	1278.46	0.477028	0.0787699	6.05597	1.39572e-09	5.77064e-07		CA1 enriched	3	2	2
12833	Col6a1	collagen, type VI, alpha 1	ENSMUSG00000001119	425.679	0.56078	0.0968081	5.7927	6.92653e-09	2.69022e-06		DG enriched	1	2	3
14395	Gabra2	gamma-aminobutyric acid (GABA) A receptor, subunit alpha 2	ENSMUSG00000000560	7562.6	0.502596	0.0875361	5.74159	9.37942e-09	3.43474e-06		no apparent region differences	1	1	1
84004	Mcam	melanoma cell adhesion molecule	ENSMUSG00000032135	200.83	0.599826	0.105765	5.67133	1.41693e-08	5.04467e-06		no apparent region differences	1	1	1
54139	Irf6	interferon regulatory factor 6	ENSMUSG00000026638	54.4809	0.529744	0.0940163	5.6346	1.75465e-08	6.0782e-06		no apparent region differences	1	1	1	based on Habib et al., 2016/Zeisel et al., 2018
18708	Pik3r1	phosphoinositide-3-kinase regulatory subunit 1	ENSMUSG00000041417	3814.36	0.396736	0.0714705	5.55105	2.83963e-08	8.93283e-06		CA1 and DG enriched	2	1	2
15511	Hspa1b	heat shock protein 1B	ENSMUSG00000090877	610.927	0.483818	0.0906262	5.33861	9.36623e-08	2.66771e-05		no apparent region differences	1	1	1	based on Habib et al., 2016/Zeisel et al., 2018
14766	Adgrg1	adhesion G protein-coupled receptor G1	ENSMUSG00000031785	1176.29	0.428788	0.0842142	5.09164	3.54983e-07	9.28533e-05	Gpr56	no apparent region differences	1	1	2
27981	Rsrp1	arginine/serine rich protein 1	ENSMUSG00000037266	3462.65	0.370393	0.073038	5.07123	3.95246e-07	9.93307e-05		no apparent region differences	3	3	3
11639	Ak4	adenylate kinase 4	ENSMUSG00000028527	3573.36	0.352176	0.0699668	5.03348	4.81668e-07	0.000118722		CA3 enriched	0	2	0
64074	Smoc2	SPARC related modular calcium binding 2	ENSMUSG00000023886	1156.09	0.405472	0.0807653	5.02038	5.15706e-07	0.000122404		CA3 and DG enriched	0	2	2
50723	Icosl	icos ligand	ENSMUSG00000000732	260.638	0.511773	0.102625	4.98683	6.13781e-07	0.000140479		no apparent region differences	1	1	1
56338	Txnip	thioredoxin interacting protein	ENSMUSG00000038393	254.08	0.511919	0.104981	4.87628	1.08105e-06	0.000230931		no apparent region differences	0	0	0
14580	Gfap	glial fibrillary acidic protein	ENSMUSG00000020932	382.451	0.494825	0.102255	4.83912	1.30418e-06	0.000269609		Most expressed elsewhere in hippocampus	0	0	0	Maybe residual astrocyte contamination
30806	Adamts8	a disintegrin-like and metallopeptidase (reprolysin type) with thrombospondin type 1 motif, 8	ENSMUSG00000031994	304.556	0.496444	0.103024	4.81871	1.44486e-06	0.00029395		CA3 enriched	0	1	0
12747	Clk1	CDC-like kinase 1	ENSMUSG00000026034	572.657	0.469024	0.0975357	4.80874	1.51884e-06	0.000304171		no apparent region differences	3	3	3
18530	Pcdh8	protocadherin 8	ENSMUSG00000036422	3626.96	0.339076	0.0711216	4.76756	1.86474e-06	0.000362128		DG enriched	1	1	2
106759	Ticam1	toll-like receptor adaptor molecule 1	ENSMUSG00000047123	127.95	0.504859	0.107736	4.68608	2.78487e-06	0.0005173		no apparent region differences	1	1	1
230784	Sesn2	sestrin 2	ENSMUSG00000028893	1003.78	0.40866	0.0878816	4.65012	3.31734e-06	0.00059885		no apparent region differences	1	1	1	based on Habib et al., 2016/Zeisel et al., 2018
13717	Eln	elastin	ENSMUSG00000029675	522.296	0.430518	0.0925584	4.65131	3.29838e-06	0.00059885		no apparent region differences	1	1	1
18611	Pea15a	phosphoprotein enriched in astrocytes 15A	ENSMUSG00000013698	10765.3	0.302635	0.0657386	4.60361	4.15225e-06	0.000707307		no apparent region differences	3	3	3
93688	Klhl1	kelch-like 1	ENSMUSG00000022076	85.5654	0.483807	0.105062	4.60498	4.12499e-06	0.000707307		no apparent region differences	0	0	0
27367	Rpl3	ribosomal protein L3	ENSMUSG00000060036	6166.58	0.326742	0.0710072	4.60153	4.19406e-06	0.000707307		no apparent region differences	3	3	3	based on Habib et al., 2016/Zeisel et al., 2018
11303	Abca1	ATP-binding cassette, sub-family A (ABC1), member 1	ENSMUSG00000015243	216.746	0.480908	0.1046	4.5976	4.2739e-06	0.000711411		no apparent region differences	1	1	1
72693	Zcchc12	zinc finger, CCHC domain containing 12	ENSMUSG00000036699	792.272	0.396352	0.0876481	4.52208	6.12339e-06	0.000981044		no apparent region differences	1	1	1
216505	Pik3ip1	phosphoinositide-3-kinase interacting protein 1	ENSMUSG00000034614	626.237	0.448908	0.100161	4.48184	7.40009e-06	0.00112913		DG enriched	1	1	3
73340	Nptxr	neuronal pentraxin receptor	ENSMUSG00000022421	88450.3	0.267584	0.0603634	4.43289	9.2979e-06	0.00136978		no apparent region differences	3	3	3	based on Habib et al., 2016/Zeisel et al., 2018
20501	Slc16a1	solute carrier family 16 (monocarboxylic acid transporters), member 1	ENSMUSG00000032902	1101.36	0.370173	0.0836624	4.4246	9.6621e-06	0.00140726		CA1 enriched	2	1	0
16782	Lamc2	laminin, gamma 2	ENSMUSG00000026479	214.507	0.469796	0.107187	4.38295	1.17085e-05	0.00166742		CA1 and DG enriched	1	0	1	based on Habib et al., 2016/Zeisel et al., 2018
98170	Tmem132a	transmembrane protein 132A	ENSMUSG00000024736	14662.6	0.285669	0.0655449	4.35837	1.31034e-05	0.00181776		no apparent region differences	3	3	3
71685	Galnt14	polypeptide N-acetylgalactosaminyltransferase 14	ENSMUSG00000024064	828.083	0.36593	0.0840748	4.35243	1.34637e-05	0.00183579		CA3 and DG enriched	1	2	2
140743	Rem2	rad and gem related GTP binding protein 2	ENSMUSG00000022176	1738.95	0.330714	0.0764877	4.32376	1.53392e-05	0.0020695		CA1 and CA3 enriched	2	2	1
19736	Rgs4	regulator of G-protein signaling 4	ENSMUSG00000038530	11400.1	0.27916	0.0649097	4.30074	1.70229e-05	0.00222635		Most expressed elsewhere in hippocampus	1	1	1	CA2 is 3
67516	Kctd4	potassium channel tetramerisation domain containing 4	ENSMUSG00000046523	2216.56	0.331106	0.0778703	4.25202	2.11855e-05	0.00271535		CA3 and DG enriched	0	3	3
26558	Homer3	homer scaffolding protein 3	ENSMUSG00000003573	3196.03	0.303388	0.0713899	4.24973	2.14025e-05	0.002716		CA3 enriched	2	3	2
234577	Cpne2	copine II	ENSMUSG00000034361	1964.18	0.314978	0.0742628	4.24139	2.22138e-05	0.00273763		CA1 and DG enriched	2	1	2
20524	Slc25a17	solute carrier family 25 (mitochondrial carrier, peroxisomal membrane protein), member 17	ENSMUSG00000022404	716.545	0.368903	0.0879632	4.19383	2.7428e-05	0.00325505		no apparent region differences	2	2	2
83669	Wdr6	WD repeat domain 6	ENSMUSG00000066357	9490.76	0.309214	0.0740983	4.17302	3.00591e-05	0.00353456		no apparent region differences	2	2	2
235542	Ppp2r3a	protein phosphatase 2, regulatory subunit B'', alpha	ENSMUSG00000043154	685.599	0.349973	0.0858209	4.07795	4.54351e-05	0.00510826		CA3 and DG enriched	0	1	1
238323	Rps6kl1	ribosomal protein S6 kinase-like 1	ENSMUSG00000019235	2643.28	0.293795	0.0724994	4.05237	5.07011e-05	0.00555416		CA3 enriched	2	3	1
11853	Rhoc	ras homolog family member C	ENSMUSG00000002233	40.4444	0.379135	0.093615	4.04993	5.1232e-05	0.00556476		no apparent region differences	0	0	0
18111	Nnat	neuronatin	ENSMUSG00000067786	23728.3	0.32471	0.0802788	4.04478	5.23721e-05	0.00564079		CA3 and DG enriched	1	3	3
12633	Cflar	CASP8 and FADD-like apoptosis regulator	ENSMUSG00000026031	313.178	0.406083	0.100656	4.03437	5.475e-05	0.00584709		no apparent region differences	1	1	1
76459	Car12	carbonic anhydrase 12	ENSMUSG00000032373	1666.58	0.314317	0.0785765	4.00014	6.33056e-05	0.00665072		DG enriched	1	1	2
75985	Rab30	RAB30, member RAS oncogene family	ENSMUSG00000030643	922.751	0.333582	0.0834851	3.99571	6.45005e-05	0.00666696		no apparent region differences	1	1	1
17919	Myo5b	myosin VB	ENSMUSG00000025885	6765.95	0.280806	0.0704709	3.98471	6.75636e-05	0.0069277		CA1 and CA3 enriched	3	3	2
74718	Snx16	sorting nexin 16	ENSMUSG00000027534	897.396	0.353372	0.0894226	3.95171	7.75963e-05	0.00776994		no apparent region differences	1	1	1
74211	1700017B05Rik	RIKEN cDNA 1700017B05 gene	ENSMUSG00000032300	1102.46	0.359578	0.0912615	3.94009	8.1452e-05	0.00790832	C15orf39	CA1 and CA3 enriched	3	3	2
108151	Sema3d	sema domain, immunoglobulin domain (Ig), short basic domain, secreted, (semaphorin) 3D	ENSMUSG00000040254	166.956	0.42213	0.107473	3.92778	8.57342e-05	0.00804367		no apparent region differences	1	1	1	based on Habib et al., 2016/Zeisel et al., 2018
72003	Synpr	synaptoporin	ENSMUSG00000056296	2717.91	0.32757	0.0842145	3.8897	0.000100367	0.00912342		CA3 and DG enriched	1	3	3
13198	Ddit3	DNA-damage inducible transcript 3	ENSMUSG00000025408	232.456	0.410614	0.10563	3.88729	0.000101371	0.0091423	CHOP	CA1 and CA3 enriched	3	3	2
218454	Lhfpl2	lipoma HMGIC fusion partner-like 2	ENSMUSG00000045312	880.449	0.330714	0.0853461	3.87497	0.000106637	0.00942601		DG enriched	0	1	2
193740	Hspa1a	heat shock protein 1A	ENSMUSG00000091971	482.79	0.370564	0.0957992	3.86814	0.00010967	0.00960088		no apparent region differences	1	1	1	based on Habib et al., 2016/Zeisel et al., 2018
233651	Dchs1	dachsous cadherin related 1	ENSMUSG00000036862	405.42	0.391131	0.10127	3.86226	0.000112342	0.009729		no apparent region differences	1	1	1
15114	Hap1	huntingtin-associated protein 1	ENSMUSG00000006930	5061.58	0.272212	0.0705416	3.85888	0.000113908	0.00979837		DG enriched	1	2	3
18767	Pkia	protein kinase inhibitor, alpha	ENSMUSG00000027499	4779.87	0.303666	0.0788276	3.85227	0.000117026	0.00999945		DG enriched	1	2	3
67468	Mmd	monocyte to macrophage differentiation-associated	ENSMUSG00000003948	10884	0.286919	0.0747748	3.83711	0.000124488	0.0105667		no apparent region differences	3	3	3
21338	Tacr3	tachykinin receptor 3	ENSMUSG00000028172	175.639	0.407161	0.106361	3.82811	0.000129129	0.0108519		Most expressed elsewhere in hippocampus	0	0	0	Ventral subiculum
21912	Tspan7	tetraspanin 7	ENSMUSG00000058254	23152	0.237886	0.062325	3.81686	0.000135161	0.0112491		no apparent region differences	3	3	3
71436	Flrt3	fibronectin leucine rich transmembrane protein 3	ENSMUSG00000051379	1378.85	0.307155	0.0809767	3.79312	0.000148764	0.0120678		CA3 enriched	1	3	2
72747	Ttc39c	tetratricopeptide repeat domain 39C	ENSMUSG00000024424	1077.61	0.294598	0.078906	3.73353	0.000188813	0.0144912		CA3 and DG enriched	1	3	3
14828	Hspa5	heat shock protein 5	ENSMUSG00000026864	12487.3	0.225546	0.0608428	3.70703	0.000209707	0.0156268	BiP(ER stress related)	CA1 and CA3 enriched	3	3	2
244954	Prss35	protease, serine 35	ENSMUSG00000033491	770.952	0.324176	0.0876902	3.69683	0.000218311	0.0159891		CA3 enriched	0	1	0
16480	Jup	junction plakoglobin	ENSMUSG00000001552	1445.74	0.28886	0.0790272	3.6552	0.000256981	0.0181973		CA3 and DG enriched	0	1	1
55963	Slc1a4	solute carrier family 1 (glutamate/neutral amino acid transporter), member 4	ENSMUSG00000020142	1831.41	0.276209	0.0759407	3.63717	0.000275654	0.0192014		no apparent region differences	1	1	1
18164	Nptx1	neuronal pentraxin 1	ENSMUSG00000025582	27437.3	0.240476	0.0663637	3.62361	0.000290514	0.019806		no apparent region differences	3	3	3	Absent CA2
73047	Camk2n2	calcium/calmodulin-dependent protein kinase II inhibitor 2	ENSMUSG00000051146	2396.69	0.336563	0.0930506	3.61698	0.000298055	0.0201061		no apparent region differences	1	1	1	based on Habib et al., 2016/Zeisel et al., 2018
12476	Cd151	CD151 antigen	ENSMUSG00000025510	189.093	0.383647	0.106423	3.60491	0.000312262	0.0207371		no apparent region differences	1	1	1
22339	Vegfa	vascular endothelial growth factor A	ENSMUSG00000023951	529.927	0.326816	0.090955	3.59316	0.000326693	0.0213634		no apparent region differences	2	2	2
18160	Npr1	natriuretic peptide receptor 1	ENSMUSG00000027931	95.0395	0.381324	0.106546	3.57895	0.000344973	0.0222187		CA3 enriched	0	1	0
213262	Fstl5	follistatin-like 5	ENSMUSG00000034098	1745.32	0.27668	0.077536	3.56841	0.000359148	0.0227881		CA3 enriched	0	1	0
114128	Laptm4b	lysosomal-associated protein transmembrane 4B	ENSMUSG00000022257	967.893	0.287377	0.0809458	3.55025	0.000384872	0.0241809		CA1 and CA3 enriched	3	3	2
12832	Col5a2	collagen, type V, alpha 2	ENSMUSG00000026042	69.0177	0.357306	0.101045	3.53611	0.000406069	0.0252098		no apparent region differences	1	1	1
14608	Gpr83	G protein-coupled receptor 83	ENSMUSG00000031932	489.097	0.334412	0.0945752	3.53594	0.000406333	0.0252098		CA3 enriched	1	2	0
23967	Osr1	odd-skipped related transcription factor 1	ENSMUSG00000048387	234.272	0.368095	0.105252	3.49726	0.000470061	0.0285141		CA3 enriched	0	1	0
12778	Ackr3	atypical chemokine receptor 3	ENSMUSG00000044337	376.758	0.350039	0.100184	3.49396	0.000475918	0.0285664		CA3 and DG enriched	0	1	1
15519	Hsp90aa1	heat shock protein 90, alpha (cytosolic), class A member 1	ENSMUSG00000021270	38716	0.220116	0.0630096	3.49337	0.00047696	0.0285664		CA1 and CA3 enriched	3	3	2
245386	Tmem255a	transmembrane protein 255A	ENSMUSG00000036502	554.068	0.348894	0.100137	3.48418	0.000493642	0.0294279		CA1 and DG enriched	2	1	2	based on Habib et al., 2016/Zeisel et al., 2018
12576	Cdkn1b	cyclin-dependent kinase inhibitor 1B	ENSMUSG00000003031	1417.82	0.274814	0.0790391	3.47693	0.000507181	0.0299564		no apparent region differences	2	2	2
170770	Bbc3	BCL2 binding component 3	ENSMUSG00000002083	523.905	0.34019	0.0980979	3.46786	0.000524619	0.0304255		CA1 and CA3 enriched	3	3	2
70584	Pak4	p21 protein (Cdc42/Rac)-activated kinase 4	ENSMUSG00000030602	211.261	0.362857	0.104732	3.46462	0.000530982	0.0305183		no apparent region differences	1	1	1
74480	Samd4	sterile alpha motif domain containing 4	ENSMUSG00000021838	386.209	0.350237	0.101355	3.45554	0.0005492	0.0312849		no apparent region differences	1	1	1
74747	Ddit4	DNA-damage-inducible transcript 4	ENSMUSG00000020108	2496.78	0.241854	0.0704793	3.43156	0.000600124	0.0335886		no apparent region differences	2	2	2
50875	Tmod3	tropomodulin 3	ENSMUSG00000058587	932.898	0.34228	0.100076	3.42022	0.000625711	0.0345678		no apparent region differences	1	1	1
100502846	Gm19410	predicted gene, 19410	ENSMUSG00000109372	1098.46	0.301957	0.0887424	3.40262	0.000667432	0.0365048		No data
66895	Pxdc1	PX domain containing 1	ENSMUSG00000021411	214.609	0.36159	0.106823	3.38494	0.000711938	0.0385017		DG enriched	1	1	2	based on Habib et al., 2016/Zeisel et al., 2018
108800	Ston2	stonin 2	ENSMUSG00000020961	275.191	0.349408	0.104085	3.35694	0.000788115	0.0418352		DG enriched	1	1	2	based on Habib et al., 2016/Zeisel et al., 2018
214058	Megf11	multiple EGF-like-domains 11	ENSMUSG00000036466	755.044	0.294431	0.0880223	3.34496	0.000822936	0.0432277		no apparent region differences	1	1	1
12822	Col18a1	collagen, type XVIII, alpha 1	ENSMUSG00000001435	80.8724	0.35075	0.105207	3.33392	0.000856308	0.0442552		no apparent region differences	0	0	0
58235	Nectin1	nectin cell adhesion molecule 1	ENSMUSG00000032012	4676.29	0.239663	0.0721734	3.32065	0.000898074	0.045677	Pvrl1	CA3 enriched	2	3	2
244810	AW551984	expressed sequence AW551984	ENSMUSG00000038112	228.425	0.342669	0.103696	3.30456	0.000951244	0.0480004		no apparent region differences	0	0	0
16777	Lamb1	laminin B1	ENSMUSG00000002900	1553.88	0.267743	0.0812474	3.2954	0.000982813	0.0488245		CA3 enriched	1	2	1

## Sheet: Downregulated
ENTREZID	SYMBOL	GENENAME	GeneID	Base mean	log2(FC)	StdErr	Wald-Stats	pvalue	padj	Alternative name/Ortholog	Expression patterns based on ABA	CA1	CA3	DG	Other notes
16010	Igfbp4	insulin-like growth factor binding protein 4	ENSMUSG00000017493	3208.67	-0.993324	0.0687465	-14.4491	2.54025e-47	1.62792e-43		CA1 enriched	3	1	1
NA	Rpl3-ps1	NA	ENSMUSG00000084349	186.438	-1.03229	0.107362	-9.61501	6.91039e-22	1.47618e-18	Rpl3-ps1	No data
67445	C1qtnf4	C1q and tumor necrosis factor related protein 4	ENSMUSG00000040794	6358.22	-0.548959	0.074307	-7.38771	1.49375e-13	1.47273e-10		CA1 and DG enriched	2	0	2
228550	Itpka	inositol 1,4,5-trisphosphate 3-kinase A	ENSMUSG00000027296	8351.91	-0.472075	0.0638659	-7.39165	1.45013e-13	1.47273e-10		CA1 and DG enriched	3	2	3
105005	Fam84a	family with sequence similarity 84, member A	ENSMUSG00000020607	2261.23	-0.5404	0.0762551	-7.08673	1.37314e-12	1.1733e-09		CA1 and DG enriched	3	1	3
76161	Lamp5	lysosomal-associated membrane protein family, member 5	ENSMUSG00000027270	668.891	-0.556314	0.0877493	-6.33981	2.30042e-10	1.3402e-07		CA1 enriched	3	2	1
NA	Ctxnd1	NA	ENSMUSG00000097789	4371.28	-0.481668	0.0758975	-6.3463	2.20558e-10	1.3402e-07	Ctxnd1, gm2115	CA1 enriched	2	1	1	based on Habib et al., 2016/Zeisel et al., 2018
66297	Pantr1	POU domain, class 3, transcription factor 3 adjacent noncoding transcript 1	ENSMUSG00000060424	513.863	-0.573529	0.0913542	-6.27808	3.42781e-10	1.91018e-07		CA1 enriched	2	0	0
74596	Cds1	CDP-diacylglycerol synthase 1	ENSMUSG00000029330	2770.35	-0.46985	0.0788084	-5.96192	2.49285e-09	9.98463e-07		CA1 enriched	3	1	1
399548	Scn4b	sodium channel, type IV, beta	ENSMUSG00000046480	529.774	-0.527645	0.0912569	-5.78197	7.38301e-09	2.78318e-06		CA1 enriched	2	1	0
98970	Fibcd1	fibrinogen C domain containing 1	ENSMUSG00000026841	9710.19	-0.406398	0.0732255	-5.54995	2.8575e-08	8.93283e-06		CA1 enriched	3	1	1
NA	Gm34583	NA	ENSMUSG00000107272	183.525	-0.593419	0.106904	-5.55098	2.84079e-08	8.93283e-06	Gm34583	No data
75415	Arhgap12	Rho GTPase activating protein 12	ENSMUSG00000041225	2033.42	-0.439387	0.079151	-5.55125	2.83632e-08	8.93283e-06		CA1 enriched	3	1	2
13590	Lefty1	left right determination factor 1	ENSMUSG00000038793	305.363	-0.55609	0.101322	-5.48833	4.05746e-08	1.2382e-05		CA1 enriched	2	1	1
383787	Ankrd63	ankyrin repeat domain 63	ENSMUSG00000078137	1142.69	-0.475472	0.0874362	-5.43793	5.39044e-08	1.60673e-05		CA1 enriched	1	0	0	based on Habib et al., 2016/Zeisel et al., 2018
18991	Pou3f1	POU domain, class 3, transcription factor 1	ENSMUSG00000090125	3565.93	-0.470021	0.0870821	-5.39744	6.75991e-08	1.96913e-05		CA1 enriched	2	0	1	based on Habib et al., 2016/Zeisel et al., 2018
17155	Man1a	mannosidase 1, alpha	ENSMUSG00000003746	1733.34	-0.411607	0.0798646	-5.15381	2.55244e-07	7.11186e-05		CA1 enriched	3	1	0
13199	Ddn	dendrin	ENSMUSG00000059213	35590.6	-0.363199	0.070913	-5.12176	3.02702e-07	8.25475e-05		no apparent region differences	3	3	3
223726	Mpped1	metallophosphoesterase domain containing 1	ENSMUSG00000041708	6989.75	-0.349236	0.06856	-5.09387	3.5083e-07	9.28533e-05		CA1 enriched	3	1	0
17260	Mef2c	myocyte enhancer factor 2C	ENSMUSG00000005583	2047.17	-0.445901	0.0877609	-5.08086	3.75734e-07	9.63157e-05		DG enriched	1	1	3
58869	Pex5l	peroxisomal biogenesis factor 5-like	ENSMUSG00000027674	6024.18	-0.386927	0.077028	-5.02319	5.08191e-07	0.000122404		CA1 enriched	3	1	1
98402	Sh3bp4	SH3-domain binding protein 4	ENSMUSG00000036206	1221.11	-0.427651	0.0853949	-5.00792	5.50203e-07	0.000128217		CA1 enriched	2	1	1
16497	Kcnab1	potassium voltage-gated channel, shaker-related subfamily, beta member 1	ENSMUSG00000027827	3372.73	-0.331368	0.0671586	-4.93411	8.05177e-07	0.000181052		CA1 enriched	3	2	2
399603	Fam84b	family with sequence similarity 84, member B	ENSMUSG00000072568	365.985	-0.481068	0.0980574	-4.90599	9.29589e-07	0.000205423		CA1 enriched	2	1	1
19242	Ptn	pleiotrophin	ENSMUSG00000029838	2804.03	-0.334794	0.0685241	-4.88579	1.03017e-06	0.000223791		CA1 enriched	3	1	1
237403	Lingo3	leucine rich repeat and Ig domain containing 3	ENSMUSG00000051067	2179.48	-0.387051	0.079814	-4.84941	1.23828e-06	0.000260181		no apparent region differences	2	2	2
67784	Plxnd1	plexin D1	ENSMUSG00000030123	1470.89	-0.435545	0.0909458	-4.78907	1.67558e-06	0.000330398		CA1 enriched	1	0	0
13447	Doc2b	double C2, beta	ENSMUSG00000020848	5134.11	-0.320289	0.0678282	-4.72206	2.33473e-06	0.00044663		CA1 and DG enriched	3	0	3
353342	Peg13	paternally expressed 13	ENSMUSG00000106847	5894.64	-0.311065	0.0662788	-4.69328	2.68858e-06	0.000506758		no apparent region differences	2	2	2	based on Habib et al., 2016/Zeisel et al., 2018
74012	Rap2b	RAP2B, member of RAS oncogene family	ENSMUSG00000036894	3257.23	-0.309808	0.0668662	-4.63325	3.59969e-06	0.000640795		CA1 and CA3 enriched	3	3	2
232174	Cyp26b1	cytochrome P450, family 26, subfamily b, polypeptide 1	ENSMUSG00000063415	1271.79	-0.377532	0.0819311	-4.60792	4.06715e-06	0.000707307		CA3 enriched	1	3	0
14812	Grin2b	glutamate receptor, ionotropic, NMDA2B (epsilon 2)	ENSMUSG00000030209	19304.4	-0.376915	0.0828367	-4.55009	5.36226e-06	0.00088113		no apparent region differences	3	3	3
241514	Zfp804a	zinc finger protein 804A	ENSMUSG00000070866	1002.05	-0.400366	0.0884872	-4.52457	6.05197e-06	0.000981044		CA1 enriched	3	1	1
72978	Cnih3	cornichon family AMPA receptor auxiliary protein 3	ENSMUSG00000026514	1783.13	-0.354756	0.0788245	-4.50059	6.77667e-06	0.00106338		no apparent region differences	3	3	3
11744	Anxa11	annexin A11	ENSMUSG00000021866	1209.69	-0.407222	0.0904988	-4.49975	6.80326e-06	0.00106338		CA3 and DG enriched	1	3	3
72585	Lypd1	Ly6/Plaur domain containing 1	ENSMUSG00000026344	4175.05	-0.321735	0.0717756	-4.48251	7.37702e-06	0.00112913		CA1 enriched	3	1	2
104582	Rprml	reprimo-like	ENSMUSG00000046215	3874.09	-0.305106	0.0683931	-4.46107	8.15525e-06	0.00122972		CA1 and CA3 enriched	3	3	1	based on Habib et al., 2016/Zeisel et al., 2018
66425	Pcp4l1	Purkinje cell protein 4-like 1	ENSMUSG00000038370	238.277	-0.470017	0.105488	-4.45564	8.36422e-06	0.00124656		no apparent region differences	2	2	2
15564	Htr5b	5-hydroxytryptamine (serotonin) receptor 5B	ENSMUSG00000050534	315.069	-0.461843	0.105254	-4.38789	1.14458e-05	0.00164832		CA1 enriched	1	0	0
217944	Rapgef5	Rap guanine nucleotide exchange factor (GEF) 5	ENSMUSG00000041992	5535.03	-0.330872	0.0756333	-4.37468	1.21609e-05	0.00171281		CA1 and DG enriched	3	2	3
16499	Kcnab3	potassium voltage-gated channel, shaker-related subfamily, beta member 3	ENSMUSG00000018470	347.897	-0.430892	0.0988981	-4.35693	1.31897e-05	0.00181776		CA1 enriched	2	1	1
14735	Gpc4	glypican 4	ENSMUSG00000031119	868.48	-0.376262	0.0872324	-4.31333	1.60815e-05	0.00214704		DG enriched	1	0	3
109050	Fam212b	family with sequence similarity 212, member B	ENSMUSG00000048458	3968.03	-0.292012	0.0678584	-4.30326	1.68303e-05	0.00222385		no apparent region differences	3	3	3
51791	Rgs14	regulator of G-protein signaling 14	ENSMUSG00000052087	4262.23	-0.29143	0.0679992	-4.28579	1.82095e-05	0.00235749		CA1 enriched	2	1	1
21834	Thrb	thyroid hormone receptor beta	ENSMUSG00000021779	776.178	-0.382764	0.0901221	-4.24718	2.16482e-05	0.00272025		CA1 enriched	2	1	1
NA	9930014A18RIK	RIKEN cDNA 9930014A18 gene	ENSMUSG00000097493	125.463	-0.457375	0.107794	-4.24305	2.20499e-05	0.00273763		CA1 and DG enriched	1	0	1
104418	Dgkz	diacylglycerol kinase zeta	ENSMUSG00000040479	19684.8	-0.286907	0.0681208	-4.21173	2.53418e-05	0.00309338		CA1 and CA3 enriched	3	3	2
21885	Tle1	transducin-like enhancer of split 1	ENSMUSG00000008305	1541.21	-0.316482	0.0751962	-4.20875	2.5679e-05	0.00310498		CA1 and DG enriched	3	1	3
105246	Brd9	bromodomain containing 9	ENSMUSG00000057649	2441.21	-0.29364	0.0699924	-4.19531	2.72494e-05	0.00325505		CA1 and CA3 enriched	3	3	2
18526	Pcdh10	protocadherin 10	ENSMUSG00000049100	2771.16	-0.299723	0.0718986	-4.1687	3.06346e-05	0.00356949		CA1 and CA3 enriched	3	3	2
56349	Net1	neuroepithelial cell transforming gene 1	ENSMUSG00000021215	539.41	-0.413352	0.100097	-4.12954	3.63496e-05	0.00419723		DG enriched	2	1	3
224090	Tmem44	transmembrane protein 44	ENSMUSG00000022537	707.277	-0.371908	0.0904312	-4.11261	3.91214e-05	0.00447696		no apparent region differences	1	1	1
216795	Wnt9a	wingless-type MMTV integration site family, member 9A	ENSMUSG00000000126	231.69	-0.431788	0.105459	-4.09439	4.23288e-05	0.00480114		no apparent region differences	2	2	2
382571	Kcnf1	potassium voltage-gated channel, subfamily F, member 1	ENSMUSG00000051726	3580.5	-0.270643	0.066418	-4.07484	4.60459e-05	0.00513192		CA3 and DG enriched	1	2	2
101056001	A830036E02Rik	RIKEN cDNA A830036E02 gene	ENSMUSG00000084890	248.313	-0.431951	0.106155	-4.06905	4.72048e-05	0.00521573		DG enriched	1	0	2
170738	Kcnh7	potassium voltage-gated channel, subfamily H (eag-related), member 7	ENSMUSG00000059742	1279.55	-0.336135	0.0833578	-4.03244	5.52e-05	0.00584709		CA1 enriched	3	0	1
269389	Tox2	TOX high mobility group box family member 2	ENSMUSG00000074607	860.618	-0.332177	0.0831135	-3.99667	6.42396e-05	0.00666696		CA1 enriched	1	0	0	based on Habib et al., 2016/Zeisel et al., 2018
213436	Rtl3	retrotransposon Gag like 3	ENSMUSG00000047686	99.4691	-0.421604	0.106313	-3.96568	7.31874e-05	0.00744479	zcchc5	DG enriched	1	1	2
231605	Galnt9	polypeptide N-acetylgalactosaminyltransferase 9	ENSMUSG00000033316	6216.29	-0.261712	0.0662036	-3.95314	7.71313e-05	0.00776994		CA1 enriched	3	2	1
23965	Tenm3	teneurin transmembrane protein 3	ENSMUSG00000031561	2768.32	-0.353921	0.0896171	-3.94926	7.8394e-05	0.00778896		CA1 enriched	1	0	0
81703	Jdp2	Jun dimerization protein 2	ENSMUSG00000034271	891.109	-0.33477	0.0848225	-3.94672	7.92304e-05	0.00781151		no apparent region differences	3	3	3
14200	Fhl2	four and a half LIM domains 2	ENSMUSG00000008136	1293.87	-0.303084	0.0768713	-3.94275	8.05527e-05	0.00788126		CA1 and CA3 enriched	3	3	1
13196	Asap1	ArfGAP with SH3 domain, ankyrin repeat and PH domain1	ENSMUSG00000022377	3706.96	-0.337928	0.0858058	-3.93829	8.20634e-05	0.00790832		CA1 enriched	3	2	1
320046	F730043M19Rik	RIKEN cDNA F730043M19 gene	ENSMUSG00000052125	843.849	-0.335413	0.0852936	-3.93246	8.40823e-05	0.00804241		DG enriched	0	0	2
15444	Hpca	hippocalcin	ENSMUSG00000028785	70748.3	-0.245104	0.0624009	-3.92789	8.56954e-05	0.00804367		no apparent region differences	3	3	3
105244162	Gm39822	predicted gene, 39822	ENSMUSG00000110618	124.841	-0.423296	0.107789	-3.92709	8.59783e-05	0.00804367		No data
56695	Pnkd	paroxysmal nonkinesiogenic dyskinesia	ENSMUSG00000026179	6310.64	-0.255354	0.0655367	-3.89636	9.76506e-05	0.00906947		CA1 and CA3 enriched	3	3	2
15118	Has3	hyaluronan synthase 3	ENSMUSG00000031910	207.74	-0.409186	0.105098	-3.89339	9.88515e-05	0.00909689		no apparent region differences	1	1	1	based on Habib et al., 2016/Zeisel et al., 2018
15551	Htr1b	5-hydroxytryptamine (serotonin) receptor 1B	ENSMUSG00000049511	397.429	-0.371174	0.095365	-3.89214	9.93652e-05	0.00909689		CA1 enriched	1	0	0
26559	Hunk	hormonally upregulated Neu-associated kinase	ENSMUSG00000053414	1130.34	-0.329559	0.0848114	-3.88578	0.000102001	0.0091423		CA1 enriched	3	1	1
74199	Vit	vitrin	ENSMUSG00000024076	377.407	-0.375909	0.0969971	-3.87547	0.000106421	0.00942601		Most expressed elsewhere in hippocampus	0	1	0	CA2 is 2
108699	Chn1	chimerin 1	ENSMUSG00000056486	42986.8	-0.258421	0.0668247	-3.86715	0.000110114	0.00960088		no apparent region differences	3	3	3
64580	Ndst4	N-deacetylase/N-sulfotransferase (heparin glucosaminyl) 4	ENSMUSG00000027971	687.859	-0.328183	0.0857474	-3.82733	0.000129543	0.0108519		CA1 enriched	3	0	1
213006	Mfsd4a	major facilitator superfamily domain containing 4A	ENSMUSG00000059149	1422.43	-0.310172	0.0815454	-3.80367	0.000142568	0.011789	Mfsd4	CA1 enriched	2	1	1
74186	Ccdc3	coiled-coil domain containing 3	ENSMUSG00000026676	709.65	-0.350881	0.0923899	-3.79783	0.00014597	0.0119165		CA3 enriched	0	3	0
242594	Fyb2	FYN binding protein 2	ENSMUSG00000078612	163.562	-0.408001	0.107408	-3.79861	0.000145509	0.0119165	1700024P16Rik	Most expressed elsewhere in hippocampus	1	0	0	CA2 is 3
106393	Srl	sarcalumenin	ENSMUSG00000022519	697.973	-0.356856	0.0942025	-3.78818	0.000151753	0.0122328		Most expressed elsewhere in hippocampus	1	1	1	CA2 is 2
215378	Brinp3	bone morphogenetic protein/retinoic acid inducible neural specific 3	ENSMUSG00000035131	402.906	-0.386721	0.102186	-3.78447	0.000154035	0.0122963		no apparent region differences	1	1	1
99296	Hrh3	histamine receptor H3	ENSMUSG00000039059	1701.75	-0.307098	0.0811616	-3.78379	0.00015446	0.0122963		no apparent region differences	1	1	1
NA	A730060N03Rik	RIKEN cDNA A730060N03 gene	ENSMUSG00000092375	83.7471	-0.401001	0.106075	-3.78037	0.000156599	0.0123896		no apparent region differences	1	1	1	based on Habib et al., 2016/Zeisel et al., 2018
18753	Prkcd	protein kinase C, delta	ENSMUSG00000021948	1381.35	-0.328189	0.0872363	-3.76208	0.000168509	0.0131694		CA3 enriched	1	3	0
74411	Plpp6	phospholipid phosphatase 6	ENSMUSG00000040105	2331.96	-0.282875	0.0751805	-3.76261	0.000168148	0.0131694	Ppapdc2	CA1 enriched	3	1	1
13134	Dach1	dachshund family transcription factor 1	ENSMUSG00000055639	66.6264	-0.383393	0.102318	-3.74706	0.00017892	0.0138983		CA1 and DG enriched	2	1	2	CA2 is 3
76820	Fam49a	family with sequence similarity 49, member A	ENSMUSG00000020589	8846.14	-0.247276	0.0661258	-3.73947	0.000184407	0.0142383		CA1 and DG enriched	3	1	3
53376	Usp2	ubiquitin specific peptidase 2	ENSMUSG00000032010	1785.01	-0.311881	0.0836489	-3.72845	0.000192661	0.0146114		no apparent region differences	2	2	2
67295	Rab3c	RAB3C, member RAS oncogene family	ENSMUSG00000021700	17012	-0.26391	0.0707675	-3.72925	0.000192051	0.0146114		CA1 and CA3 enriched	3	3	0
58208	Bcl11b	B cell leukemia/lymphoma 11B	ENSMUSG00000048251	5513.07	-0.269756	0.0725392	-3.71876	0.000200203	0.0150059		CA1 and DG enriched	2	0	2
11838	Arc	activity regulated cytoskeletal-associated protein	ENSMUSG00000022602	7588.09	-0.245781	0.0660795	-3.71948	0.000199634	0.0150059		CA1 and CA3 enriched	3	3	1
78929	Polr3h	polymerase (RNA) III (DNA directed) polypeptide H	ENSMUSG00000022476	789.195	-0.321866	0.0869588	-3.70136	0.000214448	0.0158877		no apparent region differences	2	2	2
54376	Cacng3	calcium channel, voltage-dependent, gamma subunit 3	ENSMUSG00000066189	1840.62	-0.318902	0.0862107	-3.6991	0.000216369	0.0159379		CA1 enriched	2	1	1
109205	Sobp	sine oculis binding protein	ENSMUSG00000038248	5188.92	-0.292599	0.0794261	-3.68391	0.000229683	0.0167264		no apparent region differences	3	3	3
330450	Far2	fatty acyl CoA reductase 2	ENSMUSG00000030303	692.692	-0.324618	0.0885562	-3.66568	0.000246686	0.0178631		CA1 enriched	2	0	0
NA	4921539H07Rik	RIKEN cDNA 4921539H07 gene	ENSMUSG00000104586	236.635	-0.381003	0.104125	-3.6591	0.000253101	0.0180527		CA1 and CA3 enriched	2	2	0	based on Habib et al., 2016/Zeisel et al., 2018
56433	Vps29	VPS29 retromer complex component	ENSMUSG00000029462	3486.77	-0.243607	0.0665835	-3.65867	0.000253529	0.0180527		no apparent region differences	2	2	2	CA2 is 3
320405	Cadps2	Ca2+-dependent activator protein for secretion 2	ENSMUSG00000017978	3992.45	-0.244627	0.0668255	-3.66068	0.000251543	0.0180527		CA1 enriched	3	1	1
102141	Snx25	sorting nexin 25	ENSMUSG00000038291	1529.77	-0.274528	0.0753123	-3.6452	0.000267187	0.0188161		CA1 and DG enriched	2	1	2
18563	Pcx	pyruvate carboxylase	ENSMUSG00000024892	1528.49	-0.320449	0.0879786	-3.64234	0.000270166	0.018922		no apparent region differences	1	1	1
18993	Pou3f3	POU domain, class 3, transcription factor 3	ENSMUSG00000045515	2111.89	-0.275081	0.0756607	-3.63572	0.000277202	0.0192048		CA1 and DG enriched	1	0	1	based on Habib et al., 2016/Zeisel et al., 2018
228012	Tlk1	tousled-like kinase 1	ENSMUSG00000041997	2740.58	-0.283228	0.0779541	-3.63327	0.000279851	0.0192842		CA1 and CA3 enriched	3	3	2
12798	Cnn2	calponin 2	ENSMUSG00000004665	98.7013	-0.375217	0.103349	-3.63058	0.000282783	0.019382		no apparent region differences	1	1	1
13730	Emp1	epithelial membrane protein 1	ENSMUSG00000030208	33.271	-0.308155	0.0851202	-3.62024	0.000294334	0.0199602		no apparent region differences	0	0	0
228942	Cbln4	cerebellin 4 precursor protein	ENSMUSG00000067578	197.173	-0.389575	0.107788	-3.61427	0.0003012	0.0201067		CA1 and CA3 enriched	1	1	0
103551	Epop	elongin BC and polycomb repressive complex 2 associated protein	ENSMUSG00000043439	891.068	-0.325704	0.0900942	-3.61515	0.000300178	0.0201067	E130012A19Rik	CA1 enriched	2	1	1
81905	Cacng8	calcium channel, voltage-dependent, gamma subunit 8	ENSMUSG00000053395	7950.8	-0.270614	0.0750999	-3.60339	0.000314092	0.0207511		no apparent region differences	3	3	3
68497	Arel1	apoptosis resistant E3 ubiquitin protein ligase 1	ENSMUSG00000042350	6013.71	-0.263336	0.0732515	-3.59496	0.000324448	0.0213254		CA1 and CA3 enriched	3	3	2
67145	Tomm34	translocase of outer mitochondrial membrane 34	ENSMUSG00000018322	3000.25	-0.242291	0.0676683	-3.58058	0.000342839	0.0222187		CA1 and CA3 enriched	3	3	2
320495	Ipcef1	interaction protein for cytohesin exchange factors 1	ENSMUSG00000064065	1065.66	-0.340886	0.0952149	-3.58018	0.000343362	0.0222187		DG enriched	1	1	2	based on Habib et al., 2016/Zeisel et al., 2018
67220	Plekho1	pleckstrin homology domain containing, family O member 1	ENSMUSG00000015745	360.879	-0.351286	0.098438	-3.5686	0.000358889	0.0227881		no apparent region differences	2	2	2
14166	Fgf11	fibroblast growth factor 11	ENSMUSG00000042826	828.798	-0.296889	0.0831648	-3.56988	0.000357139	0.0227881		CA1 enriched	2	1	1	based on Habib et al., 2016/Zeisel et al., 2018
230085	Phf24	PHD finger protein 24	ENSMUSG00000036062	6348.79	-0.259935	0.0729585	-3.56277	0.000366955	0.0231688		no apparent region differences	3	3	3
67603	Dusp6	dual specificity phosphatase 6	ENSMUSG00000019960	2843.51	-0.291864	0.0825546	-3.53541	0.000407148	0.0252098		CA1 enriched	3	2	0
22413	Wnt2	wingless-type MMTV integration site family, member 2	ENSMUSG00000010797	245.549	-0.36383	0.103281	-3.52272	0.000427135	0.0263202		CA1 enriched	1	0	0
74901	Kbtbd11	kelch repeat and BTB (POZ) domain containing 11	ENSMUSG00000055675	7284.98	-0.295084	0.0839975	-3.513	0.00044307	0.0271715		no apparent region differences	3	3	3
99633	Adgrl2	adhesion G protein-coupled receptor L2	ENSMUSG00000028184	1370.32	-0.280123	0.0801026	-3.49705	0.000470435	0.0285141	Lphn2	CA1 enriched	3	2	2
69480	Ttc9	tetratricopeptide repeat domain 9	ENSMUSG00000042734	1254.58	-0.291098	0.0832572	-3.49637	0.000471639	0.0285141		CA1 enriched	2	1	1
223626	Them6	thioesterase superfamily member 6	ENSMUSG00000056665	1225.91	-0.280174	0.0804912	-3.4808	0.000499916	0.029664		CA3 enriched	1	3	2
12354	Car7	carbonic anhydrase 7	ENSMUSG00000031883	497.34	-0.324841	0.0934613	-3.47567	0.000509585	0.0299603		CA1 enriched	1	0	0
18143	Npas2	neuronal PAS domain protein 2	ENSMUSG00000026077	818.169	-0.326195	0.0939385	-3.47243	0.000515773	0.0301857		CA1 enriched	1	0	0
NA	Gm4202	NA	ENSMUSG00000091421	280.515	-0.369922	0.106638	-3.46895	0.000522495	0.0304255	Gm4202	No data
384061	Fndc5	fibronectin type III domain containing 5	ENSMUSG00000001334	2337.75	-0.243396	0.0702431	-3.46505	0.000530128	0.0305183		CA1 and CA3 enriched	3	3	1
225288	Fhod3	formin homology 2 domain containing 3	ENSMUSG00000034295	503.503	-0.347435	0.100396	-3.46064	0.00053889	0.0308346		Most expressed elsewhere in hippocampus	1	1	0	CA2 is 3
69952	Tunar	Tcl1 upstream neural differentiation associated RNA	ENSMUSG00000097929	854.603	-0.306643	0.0888028	-3.45308	0.000554228	0.0314316		no apparent region differences	1	1	1	based on Habib et al., 2016/Zeisel et al., 2018
330941	AI593442	expressed sequence AI593442	ENSMUSG00000078307	3665.41	-0.238534	0.0693242	-3.44085	0.000579886	0.0327419		CA1 and DG enriched	3	2	3
20449	St8sia1	ST8 alpha-N-acetyl-neuraminide alpha-2,8-sialyltransferase 1	ENSMUSG00000030283	1697.71	-0.264631	0.0770992	-3.43235	0.000598383	0.0335886		CA1 enriched	3	2	2
66152	Uqcr10	ubiquinol-cytochrome c reductase, complex III subunit X	ENSMUSG00000059534	1765.17	-0.257184	0.0751292	-3.42322	0.000618847	0.0344482		CA1 and CA3 enriched	1	1	0
67434	Ankrd33b	ankyrin repeat domain 33B	ENSMUSG00000022237	1592.2	-0.286235	0.0836373	-3.42234	0.000620857	0.0344482		no apparent region differences	1	1	1
242083	Ppm1l	protein phosphatase 1 (formerly 2C)-like	ENSMUSG00000027784	4138.76	-0.239588	0.0700979	-3.41791	0.000631034	0.0347123		CA3 enriched	1	2	1
13653	Egr1	early growth response 1	ENSMUSG00000038418	9517.64	-0.223076	0.065575	-3.40185	0.000669316	0.0365048		CA1 and CA3 enriched	3	3	2
240185	Jcad	junctional cadherin 5 associated	ENSMUSG00000033960	1714.9	-0.296504	0.0875873	-3.38524	0.000711169	0.0385017		CA1 enriched	2	1	1
19731	Rgl1	ral guanine nucleotide dissociation stimulator,-like 1	ENSMUSG00000026482	3925.3	-0.24697	0.073049	-3.38088	0.000722541	0.0389109		CA1 and CA3 enriched	3	3	2
11600	Angpt1	angiopoietin 1	ENSMUSG00000022309	98.677	-0.356765	0.10594	-3.36763	0.000758183	0.0406596		no apparent region differences	0	0	0	based on Habib et al., 2016/Zeisel et al., 2018
20265	Scn1a	sodium channel, voltage-gated, type I, alpha	ENSMUSG00000064329	1348.19	-0.280928	0.083547	-3.36251	0.000772368	0.0412477		no apparent region differences	1	1	1
81006	Gpr63	G protein-coupled receptor 63	ENSMUSG00000040372	334.691	-0.349699	0.104213	-3.35562	0.000791881	0.0418352		CA1 enriched	2	1	0
330319	Wipf3	WAS/WASL interacting protein family, member 3	ENSMUSG00000086040	30685.9	-0.274262	0.0817432	-3.35517	0.000793163	0.0418352		no apparent region differences	3	3	3	based on Habib et al., 2016/Zeisel et al., 2018
73707	Gucy2g	guanylate cyclase 2g	ENSMUSG00000055523	110.022	-0.356051	0.106516	-3.3427	0.00082969	0.0434046		no apparent region differences	1	1	1
212531	Sh3bgrl2	SH3 domain binding glutamic acid-rich protein like 2	ENSMUSG00000032261	813.154	-0.288633	0.0864451	-3.33892	0.000841049	0.04382		CA1 and DG enriched	1	0	1
211586	Tfdp2	transcription factor Dp 2	ENSMUSG00000032411	722.085	-0.29465	0.0882979	-3.33701	0.000846863	0.0439443		CA1 enriched	2	1	1
12570	Cdk5r2	cyclin-dependent kinase 5, regulatory subunit 2 (p39)	ENSMUSG00000090071	14862.2	-0.291685	0.0875311	-3.33236	0.000861138	0.0443262		CA1 and CA3 enriched	3	3	2
67017	Fam210b	family with sequence similarity 210, member B	ENSMUSG00000027495	985.197	-0.274877	0.0827271	-3.32269	0.000891525	0.0456454		no apparent region differences	1	1	1
19276	Ptprn2	protein tyrosine phosphatase, receptor type, N polypeptide 2	ENSMUSG00000056553	11237.7	-0.26337	0.0792816	-3.32196	0.00089389	0.0456454		CA1 and CA3 enriched	3	3	2
57436	Gabarapl1	gamma-aminobutyric acid (GABA) A receptor-associated protein-like 1	ENSMUSG00000030161	15760.3	-0.222305	0.0672126	-3.30749	0.000941361	0.0476894		no apparent region differences	3	3	3
68729	Trim37	tripartite motif-containing 37	ENSMUSG00000018548	12294.1	-0.235271	0.0712537	-3.30188	0.000960378	0.0480827		CA1 and CA3 enriched	2	2	1
12609	Cebpd	CCAAT/enhancer binding protein (C/EBP), delta	ENSMUSG00000071637	402.591	-0.321898	0.0974751	-3.30236	0.000958749	0.0480827		CA1 and DG enriched	2	1	2
14137	Fdft1	farnesyl diphosphate farnesyl transferase 1	ENSMUSG00000021273	2356.11	-0.255373	0.0774781	-3.29607	0.000980474	0.0488245		CA3 enriched	1	2	1
19894	Rph3a	rabphilin 3A	ENSMUSG00000029608	13323.9	-0.284045	0.0862519	-3.2932	0.000990535	0.0490181		CA3 and DG enriched	1	3	3
66274	Lyrm9	LYR motif containing 9	ENSMUSG00000072640	798.319	-0.28651	0.087109	-3.28909	0.0010051	0.0495477		no apparent region differences	2	2	2	based on Habib et al., 2016/Zeisel et al., 2018

## Sheet: Synaptic genes
Synaptic gene	Gene Name	Regional Expression	Direction of change
Calb2	calbindin 2	no apparent region differences	up
Nptx1	neuronal pentraxin 1	no apparent region differences	up
Nptxr	neuronal pentraxin receptor	no apparent region differences	up
Plat	plasminogen activator, tissue	no apparent region differences	up
Rpl3	ribosomal protein L3	no apparent region differences	up
Snx16	sorting nexin 16	no apparent region differences	up
Tspan7	tetraspanin 7	no apparent region differences	up
Slc16a1	solute carrier family 16 (monocarboxylic acid transporters), member 1	CA1 enriched	up
Hsp90aa1	heat shock protein 90, alpha (cytosolic), class A member 1	CA1 and CA3 enriched	up
Myo5b	myosin VB	CA1 and CA3 enriched	up
Nectin1	nectin cell adhesion molecule 1	CA3 enriched	up
Flrt3	fibronectin leucine rich transmembrane protein 3	CA3 enriched	up
Homer3	homer scaffolding protein 3	CA3 enriched	up
Synpr	synaptoporin	CA3 and DG enriched	up
Hap1	huntingtin-associated protein 1	DG enriched	up
Ston2	stonin 2	DG enriched	up
Pcdh8	protocadherin 8	DG enriched	up
Cacng8	calcium channel, voltage-dependent, gamma subunit 8	no apparent region differences	down
Grin2b	glutamate receptor, ionotropic, NMDA2B (epsilon 2)	no apparent region differences	down
Scn1a	sodium channel, voltage-gated, type I, alpha	no apparent region differences	down
Cnih3	cornichon family AMPA receptor auxiliary protein 3	no apparent region differences	down
Hpca	hippocalcin	no apparent region differences	down
Vps29	VPS29 retromer complex component	no apparent region differences	down
Adgrl2 (Lphn2)	adhesion G protein-coupled receptor L2	CA1 enriched	down
Asap1	ArfGAP with SH3 domain, ankyrin repeat and PH domain1	CA1 enriched	down
Cacng3	calcium channel, voltage-dependent, gamma subunit 3	CA1 enriched	down
Cadps2	Ca2+-dependent activator protein for secretion 2	CA1 enriched	down
Htr1b	5-hydroxytryptamine (serotonin) receptor 1B	CA1 enriched	down
Plxnd1	plexin D1	CA1 enriched	down
Ptn	pleiotrophin	CA1 enriched	down
Rgs14	regulator of G-protein signaling 14	CA1 enriched	down
Tenm3	teneurin transmembrane protein 3	CA1 enriched	down
Arc	activity regulated cytoskeletal-associated protein	CA1 and CA3 enriched	down
Dgkz	diacylglycerol kinase zeta	CA1 and CA3 enriched	down
Pnkd	paroxysmal nonkinesiogenic dyskinesia	CA1 and CA3 enriched	down
Ptprn2	protein tyrosine phosphatase, receptor type, N polypeptide 2	CA1 and CA3 enriched	down
Rab3c	RAB3C, member RAS oncogene family	CA1 and CA3 enriched	down
Doc2b	double C2, beta	CA1 and DG enriched	down
Itpka	inositol 1,4,5-trisphosphate 3-kinase A	CA1 and DG enriched	down
Prkcd	protein kinase C, delta	CA3 enriched	down
Rph3a	rabphilin 3A	CA3 and DG enriched	down
Gpc4	glypican 4	DG enriched	down
